# Supplementary material for: Single-cell-level spatial gene expression in the embryonic neural differentiation niche
Source: HighWire-hosted journal article supplement (doi:10.1101/gr.181966.114), 2015-01-09
Supplement: Supplemental_Tables.xlsx [file Supplemental_Tables.xlsx]

## Sheet: Table S1
Table S1. EMAP IDs and the corresponding tissues that are specific to telencephalon development.
EMAP ID	Tissue	Child node of
EMAP:7469	brain	central nervous system
EMAP:7470	forebrain	brain
EMAP:7536	telencephalon (syn: cerebral hemisphere)	forebrain
EMAP:7537	cerebral cortex (syn: neopallium)	telencephalon (syn: cerebral hemisphere)
EMAP:7538	mantle layer	cerebral cortex (syn: neopallium)
EMAP:7539	marginal layer	cerebral cortex (syn: neopallium)
EMAP:7540	ventricular layer	cerebral cortex (syn: neopallium)
EMAP:7557	mantle layer	telencephalon (syn: cerebral hemisphere)
EMAP:7558	marginal layer	telencephalon (syn: cerebral hemisphere)
EMAP:7569	ventricular layer	telencephalon (syn: cerebral hemisphere)

## Sheet: Table S2
Table S2. Commonly-used neural development markers included in the image curation.
Symbol	Description	Reference
Abcg2(CDw338/Bcrp1)	express in a wide variety of stem cells, a molecular determinant of the side-population phenotype	1
Ascl1	ventral-associated neuronal commitment marker	2
Aspm	affect cortical size	3
Bcl11b(CTIP2)	neuronal marker, subcerebral neuron of layer V	2, 4
Bmi1	maintenance of postnatal stem cells	5
Btg2(Tis21)	anti-proliferative gene selectively expressed in the cell cycle just before neurogenic division, progenitor cells undergoing a neuron-producing division	3, 4
Calb2	ventral-associated marker relevant for the generation of inhibitory neurons	2
Casz1(castor)	expressed in the late neuroblasts and late-born neurons, Drosophila	3
Cd24a	differentiated neurons	6
Cd44	astrocyte-restricted precursor cells	7
Cd81	expressed by multipotent human and mouse neural progenitor cells	8
Cdh1(CD324)	cadherin, required at GABAergic synapses in cultured cortical neurons	9
Cdh2	maintains the integrity of neuroepithelial cells during development of the brain and regulates the function of synaptic functions	2, 49, 50
Cdkn1a(p21)	regulate neural stem cells	5
Cdkn1b(p27)	regulate restricted progenitor proliferation	5
Cdkn2a(p16)	age-related decline in stem cell function	5
Chat	specific indicator for monitoring the functional state of cholinergic neurons in the central and peripheral nervous systems	10
Crabp2	upregulated in differentiating motor neurons but were downregulated in mature motor neurons	11
Ctnna1	epithelium polarity	2
Ctnnb1	central regulator of proliferation versus differentiation in rodent neural progenitor cells	2, 3
Cutl1(Cux1)	expressed in embryonic SVZ precursor cells that generate upper cortical layer neurons	3, 4
Cutl2(Cux2)	expressed in embryonic SVZ precursor cells that generate upper cortical layer neurons, marker of CP layer II-IV	3, 4
Cxcr4	expressed by NSCs, direct their migration to sites of CNS injury	12
Dctn1	expressed in human neurons	13
Dcx	required for proper cortical neuronal migration and differentiation in humans	14
Dlg4	required for activity-driven synapse stabilization.	15
Dlx2	ventral-associated marker relevant for the generation of inhibitory neurons	2
Emx1	by neuronal precursor cells in the VZ and SVZ and neruons they generate (mid)	3, 16
Emx2	by neuronal precursor cells in the VZ and SVZ and neruons they generate (early), induce neuroepithelial cells to RGs	3
Eomes(TBR2)	TF in rodent to be a selective marker for IP cells, function required for SVZ neurogenesis	2, 3, 16
Etv1(ER81)	expressed in cortico-cortical and subcerebral projection neuron of layer V	4
Fas(CD95)	expressed by multipotent human and mouse neural progenitor cells	8
Fezf2	by neuronal precursor cells in the VZ and SVZ and neruons they generate (early)	3, 4
Fgf10	neuroepithelial cells	2
Foxa2	involved in specification and differentiation of mDA neurons	17
Foxg1	suppress the fate of early-born neurons to permit the later born ones, induce neuroepithelial cells to RGs	3
Foxo1	regulate gene expression prefrontal cortex	18
Foxo3	the most important FoxO for stem cell function	5
Foxo4	regulate neuroblastoma differentiation	19
Foxp2	Marker of CP layer VI	4
Fut4(Ssea-1/CD15/Lewis X)	expressed by multipotent human and mouse neural progenitor cells	8
Gap43	dual role in the development of the human nervous system	20
Gfap	glial marker	2
Glul	glutamine synthetase	21
Gpr6	marker of CP layer II-IV	4
Gria2/GluR2	glutamate receptor	22
Grid2	glutamate receptor	22
Grik1	glutamate receptor	22
Grik2	glutamate receptor	22
Grik3	glutamate receptor	22
Grm1	glutamate receptor	22
Gsk3a	neocortical development, target b-catenin for degradation	2
Gsk3b	neocortical development, target b-catenin for degradation	2
Hes1	Notch signaling,repress Ascl1 and Neurog2	2
Hes3	Notch signaling	2
Hes5	Notch signaling,repress Ascl1 and Neurog3	2
Hif1a	TF that is stablized in response to hypoxic stress	5
Htr2a	5-hydroxytryptamine (serotonin) receptor	23
Htr2b	5-hydroxytryptamine (serotonin) receptor	23
Ifaprc2(RC2)	all progenitor within the VZ	4
Igf1	diverse roles in the CNS, including regulation of synaptic plasticity, dendritic outgrowth, and involvement in neuronal survival, learning and memory, and neurological disorders	5, 51
Igf2	diverse roles in the CNS, including regulation of synaptic plasticity, dendritic outgrowth, and involvement in neuronal survival, learning and memory, and neurological disorders	5, 51
Itga4	expressed in a subset of cranial neural crest cells and in epicardial progenitor cells during early mouse development, important for normal neural crest cell migration	24, 52
Itga6	neuronal migration, neurite outgrowth, and axon guidance during olfactory development.	25
Itgb1	related to NPCs proliferation	26
Kitl	marker of CP layer II-IV	4
Lhx2	induce neuroepithelial cells to RGs and marker of layer II-IV	4
Lmo4	expressed in callosal neurons of layers II/III and V	4
Marcks	RG polarity	2
Mcph1	affect cortical size, expressed in proliferative zones, VZ and SVZ	3
Mdga1	required for layer II/III projection neurons to migrate	4
Mib1	neuronally committed TBR2-positive cells	2
Mki67(Ki67)	Inner part of SVZ	27
Mll1	required for neurogenesis by CNS stem cells, but not gliogenesis	5
Msi1	marker for CNS progenitor cells including neural stem cells	28
Mtap2(MAP2)	microtubule-associated protein	29
Nanog	required to maintain the pluripotency and self-renewal of embryonic stem cells	30
Ncam1	signaling coreceptors in neuronal migration and process outgrowth	31
Nes	Radial glia Identifier	16
Neurog1	key roles in regulating deep-layer neurogenesis	4
Neurog2	key roles in regulating deep-layer neurogenesis	4
Ngfr	nerve growth factor receptor	32
Nkx2-1(Titf1)	ventral-associated marker relevant for the generation of inhibitory neurons	2
Nog	secreted neural inducing factors	33
Nr2e1(Tlx)	VZ progenitor proliferation duringg SVZ establishment and expansion	4
Nrp2	neuropilin, migration of gonadotropin-releasing hormone neurons	34
Ntrk2	neurotrophic tyrosine kinase	35
Numb	determinant of cell fate in dividing neuroblast. Locate asymmetrically to the basal pole and promote differentiation of the basal daughter cell by inhibiting the Notch pathway	2
Opn3(encephalopsin)	Marker of CP layer V	4
Otx1	by neuronal precursor cells in the VZ and SVZ and neruons they generate (early)	3, 4
Pard3(PAR3)	epithelium polarity	2
Pard6a(PAR6)	epithelium polarity	2
Pax1(hunchback)	expressed in the early neuroblasts and early-born neurons, Drosophila	3
Pax6	oRG cells marker, VZ progenitor proliferation duringg SVZ establishment and expansion, induce neuroepithelial cells to RGs	2, 4, 16
Pdgfra	identifies a population of highly myelinogenic, migration-competent and efficiently engrafting human oligodendrocyte progenitor cells	36
Podxl	multiple roles in neural development and synapse formation	37
Pou2f1(pdm1/2)	expressed in the mid neuroblasts and mid-born neurons, Drosophila	3
Pou2f2(pdm1/2)	expressed in the mid neuroblasts and mid-born neurons, Drosophila	3
Pou2f3(pdm1/2)	expressed in the mid neuroblasts and mid-born neurons, Drosophila	3
Pou3f1(Scip)	expressed in subcerebral projection neuron in layer V and low in VI	4
Pou3f2(Brn2)	by neuronal precursor cells in the VZ and SVZ and neruons they generate (mid)	3
Pou3f3(Brn1)	by neuronal precursor cells in the VZ and SVZ and neruons they generate (mid)	3
Pou5f1	required to maintain the pluripotency and self-renewal of embryonic stem cells	30
Prdm16	required by stem cells in the nervous systems	5
Prkci	RG polarity	2
Prom1(CD133)	maintaining stem cell properties by suppressing differentiation	38
Pten	negatively regulate self renewal of CNS stem cell	3, 5
Rbfox3(NeuN)	neuronal marker	2
Rbpsuh(CBF1)	NICD signaling mediator	2
Reln(reelin)	expressed by Cajal-Retzius cells to terminate the migration of cortical neurons setting the upper boundary of CP	27
S100b	astrocyte specific protein	39
Shh	catenin signaling	2
Slc1a3(GLAST)	all progenitor within the VZ	4
Smn1	survival of motor neurons	40
Snca	neurotransmission and synaptic plasticity	41, 53, 54
Sox2	progenitor cell marker	2, 5
Sox9	CNS stem cell development	5
Stk11(Lkb1)	tumor suppressor, negatively regulate cell division; required for axon specification during neuronal polarization in the mammalian cerebral cortex	5, 55
Stx4a	synaptic plasticity	42
Svet1	expressed in embryonic SVZ precursor cells that generate upper cortical layer neurons	3, 4, 16
Syn1	synapsin, synaptic vesicle-specific proteins	43
Syp	synaptophysin, a marker protein for neuroendocrine cells and neoplasms	44
Tbr1	expressed in embryonic SVZ precursor cells that generate upper cortical layer neurons	3
Tcf4	complex with b-catenin	2
Th	only be detected in axons and terminals in the dopaminergic system	45
Thy1(CD90)	a developmentally regulated cell surface glycoprotein, found at high levels in nerve and certain other tissues	46
Tle4	marker of CP layer VI/V	4
Tnfrsf8(CD30)	a survival factor and a biomarker for transformed human pluripotent stem cells	47
Vim	Radial glia Identifier, also IP cells	16
Zfp42	a zinc finger protein expressed primarily in undifferentiated stem cells	48
Reference:
[1] Zhou, S. et al. The ABC transporter Bcrp1/ABCG2 is expressed in a wide variety of stem cells and is a molecular determinant of the side-population phenotype. Nat Med 7, 1028-1034 (2001).
[2] Lui, J.H., Hansen, D.V. & Kriegstein, A.R. Development and evolution of the human neocortex. Cell 146, 18-36 (2011).
[3] Kriegstein, A., Noctor, S. & Martinez-Cerdeno, V. Patterns of neural stem and progenitor cell division may underlie evolutionary cortical expansion. Nat Rev Neurosci 7, 883-890 (2006).
[4] Molyneaux, B.J., Arlotta, P., Menezes, J.R.L. & Macklis, J.D. Neuronal subtype specification in the cerebral cortex. Nat Rev Neurosci 8, 427-437 (2007).
[5] Nakada, D., Levi, B.P. & Morrison, S.J. Integrating physiological regulation with stem cell and tissue homeostasis. Neuron 70, 703-718 (2011).
[6] Pruszak, J., Sonntag, K.C., Aung, M.H., Sanchez-Pernaute, R. & Isacson, O. Markers and methods for cell sorting of human embryonic stem cell-derived neural cell populations. Stem Cells 25, 2257-2268 (2007).
[7] Liu, Y. et al. CD44 expression identifies astrocyte-restricted precursor cells. Developmental biology 276, 31-46 (2004).
[8] Klassen, H., Schwartz, M.R., Bailey, A.H. & Young, M.J. Surface markers expressed by multipotent human and mouse neural progenitor cells include tetraspanins and non-protein epitopes. Neuroscience letters 312, 180-182 (2001).
[9] Fiederling, A., Ewert, R., Andreyeva, A., Jungling, K. & Gottmann, K. E-cadherin is required at GABAergic synapses in cultured cortical neurons. Neuroscience letters 501, 167-172 (2011).
[10] Oda, Y. Choline acetyltransferase: the structure, distribution and pathologic changes in the central nervous system. Pathology international 49, 921-937 (1999).
[11] Chaerkady, R. et al. Temporal Analysis of Neural Differentiation Using Quantitative Proteomics. J Proteome Res 8, 1315-1326 (2009).
[12] Imitola, J. et al. Directed migration of neural stem cells to sites of CNS injury by the stromal cell-derived factor 1alpha/CXC chemokine receptor 4 pathway. Proceedings of the National Academy of Sciences of the United States of America 101, 18117-18122 (2004).
[13] Tokito, M.K., Howland, D.S., Lee, V.M.Y. & Holzbaur, E.L.F. Functionally distinct isoforms of dynactin are expressed in human neurons. Mol Biol Cell 7, 1167-1180 (1996).
[14] Meyer, G., Perez-Garcia, C.G. & Gleeson, J.G. Selective expression of doublecortin and LIS1 in developing human cortex suggests unique modes of neuronal movement. Cereb Cortex 12, 1225-1236 (2002).
[15] Ehrlich, I., Klein, M., Rumpel, S. & Malinow, R. PSD-95 is required for activity-driven synapse stabilization. Proceedings of the National Academy of Sciences of the United States of America 104, 4176-4181 (2007).
[16] Noctor, S.C., Martinez-Cerdeno, V. & Kriegstein, A.R. Contribution of intermediate progenitor cells to cortical histogenesis. Arch Neurol-Chicago 64, 639-642 (2007).
[17] Ferri, A.L.M. et al. Foxa1 and Foxa2 regulate multiple phases of midbrain dopaminergic neuron development in a dosage-dependent manner. Development 134, 2761-2769 (2007).
[18] Dumitriu, A. et al. Gene Expression Profiles in Parkinson Disease Prefrontal Cortex Implicate FOXO1 and Genes under Its Transcriptional Regulation. Plos Genet 8 (2012).
[19] Mei, Y. et al. Regulation of neuroblastoma differentiation by forkhead transcription factors FOXO1/3/4 through the receptor tyrosine kinase PDGFRA. Proceedings of the National Academy of Sciences of the United States of America 109, 4898-4903 (2012).
[20] Kanazir, S. et al. GAP-43 mRNA expression in early development of human nervous system. Mol Brain Res 38, 145-155 (1996).
[21] Miyake, T. & Kitamura, T. Glutamine synthetase immunoreactivity in two types of mouse brain glial cells. Brain research 586, 53-60 (1992).
[22] Waxman, S.G. Molecular neurology. (Elsevier Academic Press, Burlington, MA; 2007).
[23] Brady, S.T., Siegel, G.J., Albers, R.W., Price, D.L. & Benjamins, J. Basic neurochemistry : principles of molecular, cellular, and medical neurobiology, Edn. 8th. (Elsevier/Academic Press, Amsterdam ; Boston; 2012).
[24] Pinco, K.A., Liu, S. & Yang, J.T. alpha4 integrin is expressed in a subset of cranial neural crest cells and in epicardial progenitor cells during early mouse development. Mechanisms of development 100, 99-103 (2001).
[25] Whitley, M., Treloar, H., De Arcangelis, A., Georges Labouesse, E. & Greer, C.A. The alpha6 integrin subunit in the developing mouse olfactory bulb. Journal of neurocytology 34, 81-96 (2005).
[26] Wang, Y. et al. The promotion of neural progenitor cells proliferation by aligned and randomly oriented collagen nanofibers through beta1 integrin/MAPK signaling pathway. Biomaterials 32, 6737-6744 (2011).
[27] Bystron, I., Blakemore, C. & Rakic, P. Development of the human cerebral cortex: Boulder Committee revisited. Nat Rev Neurosci 9, 110-122 (2008).
[28] Kaneko, Y. et al. Musashi1: an evolutionally conserved marker for CNS progenitor cells including neural stem cells. Dev Neurosci 22, 139-153 (2000).
[29] Shafit-Zagardo, B. & Kalcheva, N. Making sense of the multiple MAP-2 transcripts and their role in the neuron. Mol Neurobiol 16, 149-162 (1998).
[30] Loh, Y.-H. et al. The Oct4 and Nanog transcription network regulates pluripotency in mouse embryonic stem cells. Nat Genet 38, 431-440 (2006).
[31] Schmid, R.S. & Maness, P.F. L1 and NCAM adhesion molecules as signaling coreceptors in neuronal migration and process outgrowth. Curr Opin Neurobiol 18, 245-250 (2008).
[32] Gillen, C., Korfhage, C. & Muller, H.W. Gene expression in nerve regeneration. Neuroscientist 3, 112-122 (1997).
[33] Hemmati-Brivanlou, A. & Melton, D. Vertebrate embryonic cells will become nerve cells unless told otherwise. Cell 88, 13-17 (1997).
[34] Cariboni, A. et al. Neuropilins and their ligands are important in the migration of gonadotropin-releasing hormone neurons. The Journal of neuroscience : the official journal of the Society for Neuroscience 27, 2387-2395 (2007).
[35] Klein, R. Role of neurotrophins in mouse neuronal development. FASEB journal : official publication of the Federation of American Societies for Experimental Biology 8, 738-744 (1994).
[36] Sim, F.J. et al. CD140a identifies a population of highly myelinogenic, migration-competent and efficiently engrafting human oligodendrocyte progenitor cells. Nature biotechnology 29, 934-941 (2011).
[37] Vitureira, N. et al. Podocalyxin is a novel polysialylated neural adhesion protein with multiple roles in neural development and synapse formation. PloS one 5, e12003 (2010).
[38] Coskun, V. et al. CD133+ neural stem cells in the ependyma of mammalian postnatal forebrain. Proceedings of the National Academy of Sciences of the United States of America 105, 1026-1031 (2008).
[39] Tateishi, N., Shimoda, T., Yada, N., Shinagawa, R. & Kagamiishi, Y. [S100B: astrocyte specific protein]. Nihon shinkei seishin yakurigaku zasshi = Japanese journal of psychopharmacology 26, 11-16 (2006).
[40] Paushkin, S., Gubitz, A.K., Massenet, S. & Dreyfuss, G. The SMN complex, an assemblyosome of ribonucleoproteins. Current opinion in cell biology 14, 305-312 (2002).
[41] George, J.M. The synucleins. Genome biology 3, REVIEWS3002 (2002).
[42] Mohanasundaram, P. & Shanmugam, M.M. Role of syntaxin 4 in activity-dependent exocytosis and synaptic plasticity in hippocampal neurons. Science signaling 3, jc7 (2010).
[43] Fornasiero, E.F., Bonanomi, D., Benfenati, F. & Valtorta, F. The role of synapsins in neuronal development. Cellular and molecular life sciences : CMLS 67, 1383-1396 (2010).
[44] Wiedenmann, B., Franke, W.W., Kuhn, C., Moll, R. & Gould, V.E. Synaptophysin: a marker protein for neuroendocrine cells and neoplasms. Proceedings of the National Academy of Sciences of the United States of America 83, 3500-3504 (1986).
[45] Pickel, V.M., Joh, T.H., Field, P.M., Becker, C.G. & Reis, D.J. Cellular localization of tyrosine hydroxylase by immunohistochemistry. The journal of histochemistry and cytochemistry : official journal of the Histochemistry Society 23, 1-12 (1975).
[46] Morris, R. Thy-1 in developing nervous tissue. Dev Neurosci 7, 133-160 (1985).
[47] Herszfeld, D. et al. CD30 is a survival factor and a biomarker for transformed human pluripotent stem cells. Nature biotechnology 24, 351-357 (2006).
[48] Scotland, K.B., Chen, S., Sylvester, R. & Gudas, L.J. Analysis of Rex1 (zfp42) function in embryonic stem cell differentiation. Developmental dynamics : an official publication of the American Association of Anatomists 238, 1863-1877 (2009).
[49] Suzuki, S.C. & Takeichi, M. Cadherins in neuronal morphogenesis and function. Development, growth & differentiation 50 Suppl 1, S119-130 (2008).
[50] Takeichi, M. The cadherin superfamily in neuronal connections and interactions. Nat Rev Neurosci 8, 11-20 (2007).
[51] Chiu, S.L. & Cline, H.T. Insulin receptor signaling in the development of neuronal structure and function. Neural development 5, 7 (2010).
[52] Kil, S.H., Krull, C.E., Cann, G., Clegg, D. & Bronner-Fraser, M. The alpha4 subunit of integrin is important for neural crest cell migration. Developmental biology 202, 29-42 (1998).
[53] Clayton, D.F. & George, J.M. The synucleins: a family of proteins involved in synaptic function, plasticity, neurodegeneration and disease. Trends Neurosci 21, 249-254 (1998).
[54] Cheng, F., Vivacqua, G. & Yu, S. The role of alpha-synuclein in neurotransmission and synaptic plasticity. J Chem Neuroanat 42, 242-248 (2011).
[55] Barnes, A.P. et al. LKB1 and SAD kinases define a pathway required for the polarization of cortical neurons. Cell 129, 549-563 (2007).

## Sheet: Table S3
Table S3. Raw and normalized gene expressions extracted from Eurexpress by our image analysis pipeline.
Cluster *	Eurexpress image ID	RefSeq ID	Entrez ID	Gene symbol	Gene synonyms	Relevant EMAP ID **	Marker ***	Mouse TF ****	MiRNA *****	Number of sections curated ******	L1_1	L1_2	L1_3	L1_4	L1_5	L1_6	L1_7	L1_8	L1_9	L1_10	L1_11	L1_12	L1_13	L1_14	L1_15	L1_16	L1_17	L1_18	L1_19	L1_20	L2_1	L2_2	L2_3	L2_4	L2_5	L2_6	L2_7	L2_8	L2_9	L2_10	L2_11	L2_12	L2_13	L2_14	L2_15	L2_16	L2_17	L2_18	L2_19
1	euxassay_014019_14.jpg	NM_001013577	66209	1110054O05Rik	2610312O17Rik|AA399876|Ssbip1	7569				1	4.4267	4.28222	4.58572	4.67157	4.60396	4.9333	4.56809	4.5165	4.37785	4.51475	4.5957	4.90282	5.25524	5.28484	5.5348	5.32988	5.48557	5.53264	5.51303	5.08387	3.74133	4.17094	4.64218	4.67471	4.72407	4.75927	4.43732	4.32983	4.78129	4.44102	4.78929	4.84194	5.62202	5.35702	5.07141	5.03337	5.68708	5.31089	4.97313
1	euxassay_007417_11.jpg	NM_025427	66214	1190002H23Rik	Rgc-32|Rgc32	7569				1	5.36119	4.74854	5.34551	4.73914	5.39642	5.26263	5.09655	5.09989	5.36231	5.241	6.90852	6.84021	6.32351	6.39491	6.38755	6.47458	6.95853	6.55618	6.71654	7.10313	4.77251	4.96956	5.12176	5.01249	5.31304	5.15041	5.20916	5.1433	5.15492	5.54262	5.82424	6.1525	6.92218	6.43569	6.78126	6.5351	6.57167	6.31663	6.2529
1	euxassay_001949_11.jpg	NM_028077	72056	1810055G02Rik	AI256204	7469				1	4.87782	4.99052	5.01551	4.97531	4.9075	4.81086	4.70729	4.74663	4.91017	5.04495	5.23995	5.34819	5.28997	5.3403	5.28997	5.40415	5.28587	5.30221	5.07854	4.92343	4.94441	5.12522	5.148	5.05944	5.00806	4.9075	4.69497	4.58572	4.75556	4.9522	4.95478	5.1615	5.28792	5.23144	5.20344	5.43227	5.5029	5.58534	5.44888
1	euxassay_012294_14.jpg	NM_173750	212772	2700007P21Rik	4930448O08Rik	7569				2	3.91146	4.27565	4.27657	4.12161	4.18797	4.04599	3.84314	4.45698	4.28264	4.1647	4.1365	4.25457	4.47962	4.12161	4.27335	4.23662	4.58105	4.49124	4.29902	4.01906	3.8912	4.03503	4.05767	4.1418	4.07838	3.91928	3.93115	4.12621	4.26503	4.12965	4.3676	4.45607	4.35297	4.39643	4.19784	4.19674	4.28778	4.40307	4.2152
1	euxassay_002064_14.jpg	NM_026515	68026	2810417H13Rik	AA409629|MGC29306|Ns5apt9|Ns5atp9|Paf|mKIAA0101|p15(PAF)	7569				2	5.84386	6.20927	6.41441	5.97014	6.07407	5.94769	5.91048	6.06623	5.87814	5.85656	5.89748	6.28288	7.06957	7.15577	6.931	7.13588	6.58506	6.56101	6.41407	6.88272	6.05749	6.13566	6.17751	5.80209	6.06199	5.912	6.0778	6.20167	6.15744	6.61702	5.99297	6.51968	6.95851	6.95796	7.05707	6.84836	7.06513	7.19365	6.62157
1	euxassay_013607_11.jpg	NM_175264	77592	4931406H21Rik	-	7569				1	5.59275	5.82538	5.34973	5.19277	5.12395	5.08197	5.07009	5.28131	5.19058	5.2675	5.38468	5.69118	5.77894	6.15951	5.89438	6.11395	6.10155	5.84318	5.93905	5.9844	4.72579	5.53942	5.6854	5.34692	5.25396	5.35757	5.18702	5.2407	5.18639	5.09555	5.49796	5.35757	5.79154	6.11124	6.0645	6.2199	6.22204	5.97856	6.03384
1	euxassay_001503_11.jpg	NM_197981	72440	5930416I19Rik	2510047L19Rik	7569				1	5.94652	5.74995	5.57066	5.81233	5.86828	6.19452	6.01926	6.10373	6.49246	6.4153	6.79606	6.80038	7.20613	6.77367	6.74227	6.47274	6.05393	6.72389	7.00042	6.6133	5.70467	5.62082	5.41831	6.34329	6.32261	5.64045	5.78758	5.65643	5.97713	6.3186	6.45055	6.21408	6.7725	6.54456	6.71629	6.74497	6.58453	6.53422	6.6861
1	euxassay_006203_11.jpg	NM_015751	24015	Abce1	C79080|Oabp|RLI|RNS41|Rnaseli	7569				1	5.33151	5.47589	5.30569	5.48256	5.66242	5.358	5.44099	5.0927	5.52843	5.7235	6.08504	6.07929	5.77502	6.24545	6.24817	6.1243	6.17684	6.21474	5.99903	6.12304	5.20685	5.03381	5.39656	4.95331	5.36357	5.35128	5.12062	5.47846	5.73258	5.7746	5.84839	6.25178	6.01559	6.01523	6.16476	5.96008	6.17092	6.47083	6.32549
1	euxassay_018925_11.jpg	NM_133360	107476	Acaca	A530025K05Rik|Acac|Acc1|Gm738	7538|7569				1	6.13078	6.48409	6.62002	6.45076	6.83156	7.07426	6.38131	6.29289	6.86495	6.51667	7.03587	7.02299	6.90221	7.12269	7.10766	7.09569	6.95064	6.90154	6.4388	5.97601	6.17227	6.84668	6.8489	6.88299	6.82082	6.6433	6.50047	6.43972	6.09921	6.3354	6.94577	6.98995	7.15735	7.18845	6.96097	7.24688	7.22615	6.90221	6.62124
1	euxassay_005037_14.jpg	NM_007381	11363	Acadl	AA960361|AU018452|C79855|LCAD	7569				1	4.22015	4.36429	4.20175	4.12574	4.14059	4.14059	4.13489	3.92007	5.32938	4.55792	4.5086	4.80155	5.01481	5.4117	6.14192	5.66378	4.73421	4.80391	4.78991	4.70026	3.72627	4.20393	4.29044	4.37785	4.08381	4.10026	4.21152	3.84815	4.04913	4.10842	4.05999	4.19739	4.44194	5.2869	5.11195	5.18868	4.7414	4.73238	4.57147
1	euxassay_003190_11.jpg	NM_012006	26897	Acot1	ACH2|CTE-1|CTE-I|Cte1|D12Ucla1	7569				1	4.08851	3.94683	3.9304	4.11486	4.02487	3.85486	4.00504	3.98638	4.05136	4.16805	4.25937	4.42949	4.53203	4.81268	5.12044	4.75279	4.7053	4.57973	4.70442	4.42523	3.79178	4.00361	3.89236	3.87841	3.9289	3.91075	4.00647	3.93191	3.96307	4.11353	4.02206	4.44849	4.56723	5.10522	4.92399	4.62962	4.45163	4.47756	4.4631
1	euxassay_018932_11.jpg	NM_012006	26897	Acot1	ACH2|CTE-1|CTE-I|Cte1|D12Ucla1	7569				1	5.84522	5.64087	5.86277	5.90244	5.79856	5.90565	5.76181	6.05441	6.04181	5.92583	6.11209	6.55857	7.0727	6.85679	7.04408	6.71903	7.0171	7.09116	7.11933	7.1703	5.85356	5.75609	6.0006	6.01347	5.87238	5.82321	5.94937	5.76653	5.75054	5.90512	6.14236	6.43359	7.07341	7.00392	6.98076	7.11448	7.22597	7.04286	6.7836
1	euxassay_001099_11.jpg	NM_021330	11431	Acp1	4632432E04Rik|AI427468|Acp-1|LMW-PTP|MGC103115|MGC132904	7569				1	5.55332	5.86412	6.22759	6.39122	6.27721	6.19339	6.22245	6.06424	6.25933	6.44777	6.68218	6.89027	6.75433	6.77965	6.80961	6.93608	6.78874	6.74719	6.63554	6.71322	5.42934	5.57836	5.62588	6.12476	6.35956	6.14845	6.29814	6.35408	6.37509	6.64902	6.68561	7.12794	7.09431	7.15293	7.12851	6.76314	6.96332	6.84281	6.63836
1	euxassay_004135_11.jpg	NM_001004365	242894	Actr3b	9630005C02|ARP11|AW047569|Arp3b|Arp3beta|MGC91290	7569				1	3.27946	3.4015	3.6184	3.43577	3.4123	3.51403	3.51803	3.54378	3.49993	3.39499	3.70699	3.86621	3.9337	3.94861	4.05715	3.81018	3.83285	3.81018	3.70172	3.66006	3.44631	3.73821	3.56522	3.62026	3.44	3.52202	3.63324	3.44	3.49181	3.4166	3.43999	3.53788	3.84565	3.80035	3.85518	3.83606	3.7888	3.83285	3.58857
1	euxassay_000998_11.jpg	NM_013758	27360	Add3	AI463285|R75380	7569				1	5.79763	5.70796	5.4501	4.95392	5.08249	5.25402	5.71764	5.44029	5.43289	5.92419	6.24437	6.84314	7.08713	6.47089	6.53763	6.48778	6.12404	6.05194	6.51852	6.60505	5.68166	6.17166	5.87387	5.36644	5.16448	5.17414	5.21499	5.09505	4.87327	5.20053	5.71764	6.0479	6.39158	6.44806	6.55535	6.39381	6.5932	6.45927	6.63536
1	euxassay_002919_11.jpg	NM_013758	27360	Add3	AI463285|R75380	7569				1	5.52744	5.66701	5.20633	5.2927	5.04252	4.85861	5.16954	5.35251	5.60984	5.48655	6.19621	6.15091	6.2123	6.22863	6.46908	6.40356	6.26202	6.68387	6.58682	6.69876	5.3819	5.41296	5.2728	5.33766	4.9668	5.12522	6.00578	5.35565	5.45181	5.40718	6.0976	6.11435	6.55068	6.76747	6.73563	6.45197	6.40053	6.63504	6.84788
1	euxassay_002250_11.jpg	NM_145144	108897	Aif1l	2810003C17Rik|AI043124|C87647|Iba2|MGC30545	7569				1	3.57503	3.69865	3.69659	3.36179	3.56507	3.60953	3.43278	3.5122	3.52386	3.65901	3.59633	4.59398	4.92822	4.51673	4.42767	4.6006	4.15969	4.14466	4.2354	4.43879	3.11763	3.39264	3.46217	3.41536	3.30074	3.53312	3.48859	3.48859	3.66745	3.67792	3.83594	4.47288	4.63219	4.19074	5.03394	5.17298	4.50501	4.7401	4.8627
1	euxassay_001711_11.jpg	NM_016895	11637	Ak2	Ak-2|D4Ertd220e	7569				1	3.82222	4.11301	4.49046	4.05081	4.57456	4.22868	4.43895	4.819	4.55488	4.59744	5.19877	5.4202	5.30463	5.683	5.73509	5.0591	5.22686	4.9257	5.24811	4.71603	4.41285	3.946	4.36698	4.81521	4.34611	4.09882	4.20549	4.52502	4.64626	5.3026	5.75105	5.37713	5.45594	5.62192	5.48606	5.15969	5.19001	5.25652	4.79129
1	euxassay_003106_11.jpg	NM_021299	56248	Ak3	AA407498|AI506714|AK-3|Ak3l|Ak3l1|Akl3l	7569				2	5.69638	6.01311	5.67458	5.95486	5.46918	5.79247	6.51552	5.9967	6.57398	6.77934	7.00577	7.04028	6.8001	6.70498	6.92782	6.91747	7.11811	6.68382	7.00244	6.88121	5.12653	5.89685	6.26999	6.47697	6.32244	6.14516	6.57053	6.15483	6.65203	7.21159	6.8754	6.82479	6.76856	7.10134	6.72463	7.09836	6.67627	6.80561	6.69727
1	euxassay_012626_14.jpg	NM_019764	56332	Amotl2	AW549739|C79691|Lccp|MASCOT|mKIAA0989	7569				1	5.04841	5.15058	5.70255	5.85869	5.48767	5.2025	5.58248	5.0359	5.78502	5.11798	5.00557	5.89146	5.63457	5.42456	5.60618	5.59153	6.001	5.85751	5.33945	5.10872	4.75927	5.14064	5.54299	5.60647	5.47691	5.35967	5.56517	5.84839	5.48512	5.62486	5.22961	5.2622	5.60147	5.6244	5.79701	5.49022	6.23181	6.12529	6.64335
1	euxassay_004352_11.jpg	NM_028390	68743	Anln	1110037A17Rik|2900037I21Rik|C78101|Scraps	7569				1	4.05509	3.87562	4.28318	3.91334	3.89998	4.09198	4.06829	4.50501	5.39129	6.26831	6.26857	5.1457	4.94185	5.87734	6.16877	5.03978	4.79451	4.99308	4.96109	4.90411	4.66126	3.81995	3.86052	3.90935	3.79563	3.95399	3.99604	4.21253	4.3107	4.90678	5.44517	5.95995	6.43783	6.66905	6.05794	6.16486	6.77893	6.34672	5.76265
1	euxassay_000187_11.jpg	NM_145220	216190	Appl2	Dip3b	7540				1	4.81079	4.83121	5.447	5.25634	4.90689	4.84911	5.06274	5.3839	6.01644	6.32992	6.38121	6.40448	6.52391	6.31912	6.42999	6.41804	6.34804	6.30763	6.41579	6.56884	5.25214	5.33708	4.82556	4.43741	5.05021	5.23862	5.43445	5.34893	5.92178	5.90475	6.23309	6.17637	6.61373	6.74394	6.53597	6.4524	6.59063	6.57558	6.64169
1	euxassay_011620_11.jpg	NM_022989	65103	Arl6ip6	2310057C01Rik|2610529A11Rik|Aip-6	7569				1	4.5665	4.53524	4.48192	4.72989	4.77742	4.63814	4.86568	4.56843	4.95107	5.06833	5.42827	5.57528	5.59957	5.42774	5.55643	6.01735	5.45306	5.10716	4.74719	4.82748	4.33194	4.7247	4.74277	4.88905	4.64182	4.73506	4.56069	4.54214	4.68341	5.59484	5.48962	5.19438	5.60389	5.23751	5.10017	5.35444	5.15743	5.0845	5.37648
1	euxassay_001950_11.jpg	NM_028809	74192	Arpc5l	2010015J01Rik|AI852867|ARC16-2|AW555592|AW742746	7569				1	4.80801	5.24841	5.55327	5.41359	5.15252	5.20778	5.20126	5.22931	5.40226	5.66964	6.00404	6.21618	6.19336	6.15113	6.03737	5.80482	5.71612	5.71612	5.59864	5.56855	4.75556	5.09973	5.22503	5.0303	5.01304	5.27969	5.46348	5.47614	5.35408	5.53091	5.77292	5.93366	5.90586	6.01771	6.08064	5.84998	5.89916	5.91253	5.98265
1	euxassay_018148_11.jpg	NM_007492	11878	Arx	-	7538|7557|7569		mouseTF		1	5.45931	5.84623	6.04066	5.68484	5.62843	5.70033	5.61868	5.87574	6.52872	6.5824	6.84962	7.00589	7.2542	7.0486	6.96798	7.08654	6.87305	7.03124	7.20481	7.30324	5.4358	5.58685	5.47308	5.44833	5.41039	5.47831	5.67702	5.87095	6.12174	6.59074	7.16877	7.26519	6.95059	6.80659	6.7027	7.08654	6.86414	7.32714	7.16738
1	euxassay_006843_11.jpg	NM_025541	66403	Asf1a	2310079C17Rik|C79052	7569				1	6.05957	6.30773	5.97842	6.46721	6.15788	6.18127	6.35419	6.28769	6.23049	6.182	6.39793	6.94288	6.70318	6.69366	6.79747	6.9322	6.7132	6.413	6.39292	6.35699	5.67853	6.01688	5.93104	6.08695	6.40803	6.40236	6.63224	6.34468	6.40015	6.36848	6.43762	6.59071	6.6498	7.07671	6.79631	6.95046	6.95279	6.59812	6.32855
1	euxassay_009229_11.jpg	NM_172421	75302	Asxl2	4930556B16Rik|MGC176101|mKIAA1685	7569				1	4.33422	4.03084	3.93677	4.05996	3.99107	4.00824	4.05031	3.87568	3.85367	4.26801	4.05721	4.42122	4.40942	4.63077	5.0027	4.95698	4.95625	5.20808	4.79155	5.22777	3.64436	3.50003	3.80207	4.04478	3.94869	4.26444	3.86629	3.91416	4.47884	4.29042	4.06407	4.06271	4.77491	4.96727	4.92115	4.95181	4.93843	4.87038	4.9029
1	euxassay_003464_11.jpg	NM_178050	56298	Atl2	2010110I21Rik|AA407293|AV334690|Aip-2|Arl6ip2	7569				1	5.5545	6.11443	5.90338	5.471	5.5421	5.84741	5.69484	5.35568	5.48479	6.01294	6.03551	6.07726	6.18804	6.31158	6.3273	6.34844	5.99964	6.16774	5.74153	5.61587	4.74195	5.63043	6.12824	6.02652	5.68397	5.74588	5.64606	5.68397	5.58448	5.5108	5.67511	6.11089	5.96925	6.25289	6.43991	6.10081	6.50313	5.95683	5.80932
1	euxassay_001705_14.jpg	NM_146091	109168	Atl3	4633402C03Rik|5730596K20Rik|AI465397|AW228836|MGC28761	7569				2	5.60853	5.39783	5.33303	5.35212	5.69925	5.92313	5.72826	5.56855	5.63296	5.71916	5.72675	6.00653	6.05796	6.24606	6.30401	6.24817	6.47954	6.63761	6.44039	6.25133	5.62919	5.5029	5.56065	5.50408	5.35408	5.49226	5.44336	5.1044	5.17266	5.3851	5.90452	6.16013	6.19446	6.27429	6.19117	6.31513	6.21726	6.04224	6.08537
1	euxassay_000840_11.jpg	NM_007530	12033	Bcap29	AW208404|Bap29	7569				1	4.91889	5.26716	5.00045	5.48622	5.04806	4.88421	4.72483	4.85016	5.21804	5.02083	5.41349	5.16542	5.28371	5.64382	5.40822	5.55864	5.77549	5.5277	5.55045	5.28124	4.88638	5.296	5.10242	5.46883	5.46521	4.91642	4.77955	4.8755	4.84459	4.8755	5.12097	5.44915	5.68989	5.6874	5.6604	5.35829	5.28946	5.16631	5.69299
1	euxassay_006212_11.jpg	NM_025392	66165	Bccip	1110013J05Rik|TOK-1	7569				1	4.62523	5.09539	5.43888	5.45463	5.50543	5.8779	5.82838	5.77752	5.74416	5.73988	5.7497	6.09109	6.62838	5.9389	6.43175	6.26841	6.39793	6.63681	6.28392	6.503	4.62151	5.19939	5.06287	5.95744	5.87048	5.88644	5.95227	5.91481	5.7248	5.6104	5.8476	6.25718	6.46224	6.15323	6.55649	6.88861	6.62537	6.96024	6.34304
1	euxassay_012575_11.jpg	NM_001039179	76895	Bicd2	0610027D24Rik|1110005D12Rik|AA408834|KIAA0699|mKIAA0699	7569				1	3.87514	3.89836	4.24724	4.46818	4.1692	4.45884	4.463	4.38184	4.11605	4.40617	4.59045	4.32984	4.40238	4.44348	4.45449	4.41245	4.34963	4.31112	4.79002	5.93246	4.08939	3.99632	4.59583	4.522	4.75356	4.26522	4.38513	4.50091	4.91711	4.92617	4.37524	4.4315	4.22374	4.04105	4.16686	4.32319	5.26674	6.1193	6.67686
1	euxassay_005272_11.jpg	NM_172506	117606	Boc	4732455C11|DKFZp434L072|mFLJ00376	7569				1	4.62144	4.46571	4.55271	4.71562	5.16536	4.93978	5.18917	5.07432	5.81121	6.08652	6.17875	6.27685	6.44819	6.51127	6.54814	6.65001	6.59138	6.88244	6.74741	6.71878	5.17031	4.7554	4.77049	4.99374	4.96722	5.02307	4.86459	5.17031	5.70924	5.72043	6.16888	6.1995	6.17764	6.64702	6.62607	6.54514	7.12582	7.0314	6.78278
1	euxassay_009769_14.jpg	XM_903112	207165	Bptf	9430093H17Rik|Falz|MGC54978	7569		mouseTF		1	4.55877	5.48971	5.31722	4.97749	5.26696	4.87053	5.1998	5.53322	4.85122	5.34557	5.30694	5.15552	5.52512	5.22574	5.2617	6.12266	5.83461	5.66859	6.07985	6.02183	4.48808	4.80964	4.96508	5.13568	5.00699	5.20064	4.93171	4.9075	5.62903	5.38236	5.20499	5.35632	5.34847	5.31971	5.116	5.55042	5.67749	5.81434	5.63619
1	euxassay_019531_11.jpg	NM_009764	12189	Brca1	-	7569				1	4.20486	4.49317	4.55293	4.38224	4.35677	4.57231	4.55293	4.50532	4.48706	4.82669	4.74876	4.95109	5.58009	5.66964	6.04259	5.54716	5.43474	5.23215	5.15402	4.95823	3.9664	4.40512	4.60749	4.30093	4.74706	4.58572	4.51437	4.36457	4.359	4.45296	4.52833	4.77326	5.16916	5.56565	5.92878	6.06362	5.31147	5.45307	5.26518
1	euxassay_000263_11.jpg	NM_007570	12227	Btg2	AA959598|APRO1|Pc3|TIS21	7569	marker			1	5.20962	5.57638	5.7627	5.70855	5.48771	5.58509	6.08425	7.00978	6.48371	6.64328	6.70604	6.4961	7.32332	7.42919	7.55875	7.76792	7.29118	6.91374	6.77791	6.49521	5.13403	5.12211	5.54239	5.55813	5.82	5.28967	5.53273	5.94131	6.51454	6.73612	6.56417	5.9086	6.48719	7.52629	7.48148	7.39555	7.00549	6.57514	6.46559
1	euxassay_003361_14.jpg	NM_009772	12235	Bub1	AL022991|Bub1a|C80208|D2Xrf87	7569				1	5.11214	4.87162	4.85842	5.02818	5.25919	5.34215	5.26754	5.50349	5.77517	6.19876	6.83974	7.23104	6.9784	7.20672	7.07667	7.05556	6.84894	6.67436	6.7031	6.87547	4.89156	5.04349	5.08737	5.40112	5.3126	5.27749	5.93933	5.92937	5.83761	6.4357	6.9387	7.4002	7.3202	7.03107	6.67192	6.64527	6.63337	6.74936	6.8691
1	euxassay_011420_11.jpg	NM_009773	12236	Bub1b	AU045529|BUBR1|MGC36092	7569				1	5.4146	5.57508	5.51091	5.36814	5.46386	6.00554	5.70981	6.51052	6.379	7.04951	6.87363	6.88384	7.01108	6.68969	6.5764	6.95081	7.14924	7.08854	7.18929	7.07624	5.42468	5.35197	5.32937	5.43636	5.66884	5.38523	6.69537	6.35532	6.80552	7.07013	7.05072	6.70641	6.9858	7.27876	6.61043	6.89892	6.30287	6.90629	7.12896
1	euxassay_002685_11.jpg	NM_007573	12261	C1qbp	AA407365|AA986492|D11Wsu182e|HABP1|P32|gC1qBP	7569				1	4.99304	4.92431	4.66999	4.95994	4.84473	4.73564	5.15702	5.11677	5.16448	4.92958	4.82884	4.53937	5.10983	5.15026	5.13817	5.95793	5.56911	5.24911	5.63672	4.78299	5.38071	4.99627	5.57913	5.7695	5.38702	5.29611	4.97021	5.00474	4.79459	4.61654	4.77911	4.98125	5.80242	5.66385	5.63296	5.72322	5.37483	5.59256	5.58701
1	euxassay_001714_11.jpg	NM_030888	81799	C1qtnf3	2310005P21Rik|CORS-26|CTRP3|Corcs|Cors	7569				2	4.39756	4.23398	4.64933	4.57617	4.92822	4.2053	4.12489	4.2467	4.14315	4.63757	5.50963	5.23956	5.83623	5.72192	5.05177	5.59833	5.41161	4.60412	4.39604	4.23	3.72919	4.5984	4.57505	4.31003	4.43139	4.03159	4.06709	3.96848	4.43509	5.93202	4.72664	5.24407	5.38577	5.42435	5.32628	5.36258	4.26043	4.30652	4.19016
1	euxassay_006310_14.jpg	NM_198037	320508	Cachd1	1190007F10Rik|AI852726|B430218L07Rik|Vwcd1|mKIAA1573	7540				1	4.37201	4.36869	4.14102	4.14707	4.7772	4.35979	4.84011	4.75065	5.09117	4.7772	4.85496	4.79751	5.56124	5.24562	6.11344	5.24068	5.00144	5.17194	5.38064	4.99391	3.95125	4.57107	4.04856	4.42947	4.50099	4.58465	4.58688	4.79943	4.9574	5.03442	5.38896	5.36193	5.18302	5.42982	5.49169	5.47316	5.82194	5.22076	4.82793
1	euxassay_006213_11.jpg	NM_009786	12301	Cacybp	SIP	7536				1	6.39144	6.74527	6.79664	6.58515	6.32559	6.05332	6.07318	6.04015	6.27592	6.42301	7.15599	6.45386	7.17283	6.93831	6.72355	6.61871	7.02866	6.81537	6.7134	6.55705	6.30256	6.57414	6.2698	6.59983	6.27429	6.03084	5.94325	6.22299	5.94888	6.34073	6.59015	6.64137	6.47293	6.83679	6.90169	6.74861	6.3992	6.61571	6.71085
1	euxassay_010500_14.jpg	NM_023813	108058	Camk2d	2810011D23Rik|8030469K03Rik|KIAA4163|MGC60852|[d]-CaMKII|mKIAA4163	7557				1	4.26732	3.6103	3.82005	3.85149	3.81094	3.94188	3.99713	4.53684	4.17981	3.95227	4.21993	4.08098	4.05999	4.00713	3.90168	3.95227	4.03869	3.91024	4.51317	4.26732	4.23703	4.24382	4.04064	3.80408	3.35855	3.95227	4.01112	4.35296	4.00912	4.00114	4.05806	4.34194	4.03282	4.3132	4.42786	4.26398	4.0455	4.65893	4.74065
1	euxassay_011212_11.jpg	NM_025958	67088	Cand2	2210404G23Rik|Tp120b|mKIAA0667	7569				1	5.15894	5.87705	5.96351	5.74629	5.51405	5.98729	5.93453	5.92005	5.96351	6.01482	6.44836	6.76393	7.04756	6.62981	6.95757	6.59955	6.72935	6.79338	6.32216	6.12228	5.31377	6.02511	5.75819	5.52843	5.4881	5.69976	5.85784	5.8825	5.7338	6.12534	6.49887	6.65839	6.28083	6.42617	6.85353	6.94092	6.65123	6.80561	6.72532
1	euxassay_000872_11.jpg	NM_011997	26885	Casp8ap2	AA387232|D4Ertd659e|FLASH|mKIAA1315	7569				1	4.57834	4.92394	4.95632	5.6154	5.44188	5.37855	5.57427	5.7982	6.19073	6.75905	6.4833	6.64195	6.90108	6.73908	6.7221	5.94358	5.65236	6.11874	6.12162	6.32125	5.18239	5.7394	5.70232	5.56414	5.19644	5.46311	5.59166	5.14119	5.91278	5.98137	6.2034	6.54262	6.94305	6.76584	6.8165	6.79789	6.61456	6.11122	6.13764
1	euxassay_002768_11.jpg	NM_011997	26885	Casp8ap2	AA387232|D4Ertd659e|FLASH|mKIAA1315	7569				1	4.87562	5.37392	5.42407	5.588	5.4147	5.42407	5.73745	5.62582	6.11064	6.29699	6.88558	6.55912	6.50808	6.83065	6.85371	6.84048	6.54288	6.21251	6.52428	6.28779	5.15655	5.43966	5.72856	5.54847	5.29283	5.76084	5.88267	5.46093	6.17838	6.22156	6.50464	6.90343	6.6809	6.77868	6.87264	6.90376	6.77685	6.54974	5.88918
1	euxassay_003300_11.jpg	NM_027411	70385	Ccdc99	1700018I02Rik|2600001J17Rik|2810049B11Rik|AA409762|Spdl1	7569				1	4.21967	4.03154	4.06864	4.15215	4.01379	4.15365	4.28444	4.59018	5.31302	5.94586	5.10052	5.17518	5.31543	5.30574	5.78306	5.45572	5.06169	5.22917	5.62509	5.85849	4.42265	4.06065	4.08447	4.11563	4.00516	4.02991	4.40435	4.65397	5.07317	5.58491	5.30412	5.79812	5.75067	5.18403	5.32426	5.46881	5.54769	5.10705	5.32346
1	euxassay_004323_11.jpg	NM_007630	12442	Ccnb2	CycB2	7569				1	3.71408	4.14578	4.04936	3.77155	3.78091	3.82003	4.34666	4.28468	5.016	5.24544	5.46638	5.24126	4.92213	4.74616	5.18655	5.1589	5.90029	6.06577	6.51206	5.56997	3.75027	3.95845	4.11559	3.86583	3.75977	3.98906	3.98299	4.39011	5.07758	5.21513	5.74778	5.14387	4.97971	5.59745	5.42287	5.93651	6.62337	5.90861	5.95558
1	euxassay_002325_11.jpg	NM_007634	12449	Ccnf	CycF|Fbxo1	7569				1	4.05628	4.65762	4.40869	4.7163	4.50765	4.49043	4.39134	4.39461	4.88699	5.9671	5.1719	5.75874	5.48783	5.42259	6.56867	6.26205	5.94646	5.2713	5.41822	5.61421	5.0007	4.23001	4.33501	4.54184	4.30245	4.4301	4.32548	4.46058	4.35711	5.13066	5.6439	5.79301	5.92626	5.7814	5.13783	5.05415	4.78353	4.88699	5.81026
1	euxassay_001933_11.jpg	NM_007657	12527	Cd9	Tspan29	7569				1	5.00043	4.95378	5.22633	5.09882	4.68236	5.04885	5.02361	5.39582	5.43402	5.36711	5.20534	6.11097	5.2532	5.23629	5.88983	6.82733	5.82288	5.78093	6.01508	6.48731	4.03711	4.25706	4.25006	4.53803	5.11972	4.60872	5.08157	4.66456	4.5125	5.24969	5.41724	5.74472	5.5227	5.63771	5.29327	5.20693	5.73622	5.60635	6.34233
1	euxassay_000814_14.jpg	NM_023223	107995	Cdc20	2310042N09Rik|C87100|p55CDC	7569				1	5.96803	6.05402	5.74109	5.60675	5.7059	5.59154	6.00444	6.27587	6.64766	7.08531	6.78242	6.51522	6.39322	6.70463	6.80302	7.0211	6.60606	7.02172	7.14746	7.60608	5.54835	5.68798	5.72239	5.66983	5.46661	5.61659	6.99495	7.16052	7.26301	7.13793	6.95855	7.06893	7.57846	7.40677	7.45576	7.10268	6.26933	6.59325	7.04679
1	euxassay_006791_14.jpg	NM_009862	12544	Cdc45	Cdc45l	7569				1	5.96633	5.8997	6.18038	5.92577	5.79099	5.72342	5.37818	5.73791	5.86106	6.06205	6.52932	6.40734	6.85924	6.97641	6.9489	6.60932	6.21575	6.1125	5.9532	5.68919	6.01895	6.18494	6.10064	5.96094	5.84162	5.79849	5.79907	5.75463	5.90077	6.51186	6.46219	6.51572	6.87899	6.63568	6.87079	6.62695	6.42834	6.43502	6.25532
1	euxassay_003467_14.jpg	NM_146040	217946	Cdca7l	BC006933|JPO2|MGC11998	7569				1	4.13489	4.17627	4.4588	4.49622	4.50472	4.59769	4.61872	4.65607	5.09927	5.65253	6.32216	6.36751	6.3117	6.55137	6.37603	6.11111	5.99527	5.97043	5.66095	5.12637	4.49503	4.58439	4.45734	4.35766	4.30511	4.30673	4.46897	4.49053	4.91389	5.82475	6.48169	6.04078	6.0882	6.50376	6.41713	6.02166	5.97451	5.64678	5.28258
1	euxassay_012131_11.jpg	NM_009864	12550	Cdh1	AA960649|Ecad|L-CAM|MGC107495|UVO|Um	7469	marker			1	5.56323	5.79701	5.98192	5.36134	5.07243	4.99627	5.06766	5.83789	5.93147	6.18458	6.52492	6.48521	6.40866	6.54566	6.64591	6.12419	5.8205	6.26529	6.54251	5.92885	4.97386	5.86499	6.12627	5.46141	5.51397	5.38318	5.23853	5.20995	5.79523	5.15327	5.79523	6.57566	6.42989	6.68694	6.31915	6.62657	6.60038	6.75999	6.36492
1	euxassay_011118_11.jpg	NM_001014996	219103	Cenpj	4932437H03Rik|CPAP|Gm81|LAP|LIP1|MGC102215	7569				1	5.57721	5.93254	6.525	6.37084	6.04779	6.08672	5.91177	6.15901	5.89762	6.38214	5.82637	6.21803	6.27946	6.21279	6.15772	6.02652	6.00956	6.32182	6.36978	6.02716	4.94366	5.79289	5.69284	5.66739	6.2208	6.21926	5.88295	5.70563	5.48716	5.66874	5.85038	5.46193	5.76326	6.15258	6.16891	6.42807	6.78215	6.37333	6.4215
1	euxassay_016548_11.jpg	XM_981952	26920	Cep110	6720467O09Rik|AA968343|Cep1|Cntrl|IB3/5|Ma2a8	7569				1	5.16536	5.46026	5.12401	4.9101	5.26795	5.35781	5.08305	5.09784	5.14585	5.36394	5.72941	5.6247	5.67218	6.2949	6.00267	5.38382	5.68292	5.85461	5.89365	5.66091	5.30607	5.05301	5.27033	5.00747	5.43818	5.59137	5.28743	5.08844	5.45707	5.37226	5.46642	5.71815	6.08896	5.79975	5.75169	6.22498	5.80672	5.73673	5.42509
1	euxassay_001440_11.jpg	NM_009805	12633	Cflar	2310024N18Rik|A430105C05Rik|CLARP|Cash|Casper|ENSMUSG00000072980|FLAME|FLAME-1|Flip|Gm9845|I-FLICE|MGC103395|MRIT|c-Flip	7557				1	5.03479	4.88416	4.89296	4.53159	4.51628	4.5022	4.40934	4.4007	4.52427	4.96575	4.99836	5.24835	5.39869	4.80712	4.88125	4.6627	5.30795	5.21606	4.48901	4.30199	4.75284	4.97169	4.62422	4.96135	4.58564	4.54403	4.3193	4.39853	4.62607	4.57222	4.98901	4.89054	5.06896	4.88977	4.98396	5.33487	4.92186	4.825	4.95398
1	euxassay_010758_11.jpg	XM_985866	320790	Chd7	A730019I05Rik|Cycn|Cyn|Dz|Edy|Flo|Lda|Mt|Obt|Todo|WBE1|Whi	7569				2	3.50587	3.47196	3.40166	3.32175	3.42423	3.47968	3.81029	3.88504	3.96933	3.75029	3.93081	4.25129	4.03506	4.01537	5.30105	4.91814	4.64824	5.0289	4.63632	4.14658	3.40166	3.40166	3.40166	3.40166	3.40166	3.40166	3.61129	3.53209	3.54072	3.6848	3.70184	3.99738	4.21969	4.34892	4.92268	4.54117	4.22214	5.1647	4.87743
1	euxassay_010758_14.jpg	XM_985866	320790	Chd7	A730019I05Rik|Cycn|Cyn|Dz|Edy|Flo|Lda|Mt|Obt|Todo|WBE1|Whi	7569				2	3.87298	4.00364	3.69257	3.96347	3.74005	4.00827	4.09123	4.1046	4.19239	4.62708	4.04064	4.37122	4.81616	4.72904	4.93321	4.93021	5.12915	4.77242	5.0799	5.07651	3.72324	4.00114	3.80723	3.95168	4.0448	4.04064	4.37454	4.12574	4.44457	4.59333	4.56362	4.75217	4.66097	4.49622	4.74279	4.92645	5.3451	4.90979	4.93994
1	euxassay_001955_11.jpg	NM_026885	68953	Chmp2a	1500016L11Rik	7469				1	5.88702	5.90586	5.50113	5.42482	5.39656	5.39656	5.51697	5.62648	5.81197	6.00404	6.11343	6.18127	6.38488	6.51151	6.44315	6.30806	6.25448	6.23758	6.21186	6.11574	5.46711	5.61345	5.66016	5.77877	5.84022	5.70079	5.52744	5.79763	5.98011	5.99652	5.94931	6.05314	6.19555	6.27429	6.10879	5.96479	5.98518	6.09244	5.96992
1	euxassay_005070_11.jpg	NM_025844	66917	Chordc1	1110001O09Rik|AA409036|Chp-1|morgana	7469				1	5.29046	5.33255	5.13035	5.05657	4.7773	4.8426	4.94948	5.05658	5.02316	5.224	5.60422	5.79797	5.77376	6.06145	6.35833	5.80229	5.89903	5.70833	5.90885	5.35846	5.0899	5.45036	5.13426	4.73665	5.05175	5.27161	4.96423	4.92331	5.20302	5.25312	5.37676	5.76782	6.16087	6.2232	5.96424	5.76396	6.13553	6.20272	6.35931
1	euxassay_001740_11.jpg	NM_001004140	80986	Ckap2	AI461656|AW228814|LB1	7569				2	3.84526	3.94924	4.02668	4.29513	3.94751	4.02996	4.05589	3.93184	4.64078	4.61594	5.26131	5.53117	5.44425	5.57218	5.41387	5.22019	4.87822	5.39036	5.8488	5.79669	3.6139	3.89819	3.91776	4.23114	4.24951	4.19804	4.42394	3.86006	4.04622	4.5973	5.69123	4.9326	5.2081	4.74509	5.01836	5.04093	4.42617	4.37456	5.04482
1	euxassay_001740_14.jpg	NM_001004140	80986	Ckap2	AI461656|AW228814|LB1	7569				2	4.09091	4.05921	3.9267	4.27743	4.29659	3.9805	4.18997	4.44968	3.99866	4.25522	4.71678	5.25242	5.20192	5.13507	4.93161	5.3484	5.55686	5.43469	4.54477	4.66085	3.98691	4.29251	4.04471	4.18645	4.08147	4.73917	4.56951	4.13111	5.23394	4.61492	4.36171	5.35311	5.41604	5.15949	5.33018	5.6299	5.51751	5.83026	4.56523
1	euxassay_011048_11.jpg	NM_029437	75786	Ckap5	3110043H24Rik|4930432B04Rik|D730027C18Rik|T25636|mKIAA0097	7569				1	4.55165	5.04068	5.26082	5.06482	5.26915	5.21982	5.36497	4.9844	5.25453	5.15607	5.26569	5.06067	5.58553	5.87875	5.82208	5.78767	5.85458	5.73024	6.19239	6.44215	4.64109	5.35064	5.3202	5.07199	5.03661	4.8314	5.11271	5.78205	5.54284	5.53595	5.50039	5.61526	5.68173	5.95412	6.01834	5.71079	5.98785	5.80555	6.51337
1	euxassay_011493_14.jpg	NM_021273	12709	Ckb	B-CK|Bck|Ck-3|Ck3|Ckbb	7569				1	6.7632	6.66604	6.5488	6.8916	6.41788	6.27574	6.09338	6.17018	6.53071	6.74791	7.28655	7.47638	7.49676	7.5797	7.59305	7.61054	7.47656	7.46861	7.34786	6.8476	6.11843	6.45538	6.82105	6.83422	6.62169	6.27153	6.2255	6.26146	6.47983	6.99492	7.36546	7.45025	7.44642	7.36124	7.44749	7.43603	7.33996	7.32804	7.3909
1	euxassay_009018_11.jpg	NM_007710	12715	Ckm	Ckmm|M-CK|MCK	7569				1	4.87522	5.31904	5.13579	5.11743	4.95269	4.65659	4.81114	4.90419	5.07402	5.55343	5.45577	5.61742	5.72942	5.76817	5.68025	5.68441	5.62122	5.66506	5.89884	5.62285	4.77423	4.57535	5.19638	5.80448	4.46459	4.80896	4.61794	4.6901	4.81304	5.83569	5.49599	5.44538	6.05205	5.76473	5.61742	5.85658	5.43121	5.64704	5.49717
1	euxassay_003864_11.jpg	NM_009929	12822	Col18a1	-	7469				1	7.46499	7.04904	5.66378	5.2929	4.66549	4.28927	4.63263	4.80719	4.49723	4.79487	5.9167	6.47877	6.31037	6.39988	6.01452	6.12069	6.12036	5.80482	6.26554	5.99131	6.64964	5.46711	4.80944	4.52037	4.69231	4.42231	4.30325	4.82426	4.69054	5.37078	6.25837	6.47594	6.7309	6.07658	6.37498	6.26017	6.03108	6.01877	5.50391
1	euxassay_013804_14.jpg	NM_031163	12824	Col2a1	Col2|Col2a|Col2a-1|Del1|Dmm|M100856|MGC90638|Rgsc856	7569				1	4.97531	5.09606	5.14477	5.08733	5.13307	4.60279	4.66188	5.06287	4.88365	5.116	5.15926	5.82664	5.45985	5.58868	5.57753	6.21834	5.7095	5.90986	6.13791	5.94064	4.76317	5.42935	5.52346	5.19064	5.15187	5.06561	5.04703	4.97895	5.31262	5.45359	5.55741	5.34791	5.72999	6.15868	6.46768	6.52997	6.54083	6.40286	6.41766
1	euxassay_000557_11.jpg	NM_010926	18117	Cox4nb	Fam158b|Noc4	7569				1	6.0148	5.90137	5.75708	5.59871	6.03596	5.88302	5.79221	5.93896	6.33338	6.08354	6.0291	6.3663	6.31336	6.35557	6.12122	6.24737	6.4443	6.63095	6.442	6.48692	5.96177	5.97151	6.02468	5.77417	5.72288	5.52543	5.78874	5.83707	6.05344	6.21807	6.37839	6.10966	6.19637	6.39991	6.28692	6.49317	6.53223	6.34575	6.72904
1	euxassay_009558_14.jpg	NM_170684	102278	Cpne7	AW047065	7557				1	4.74604	4.91496	4.32604	4.58839	4.65735	4.79189	4.66621	4.39319	4.64843	4.80342	4.97735	4.29861	4.8729	5.01452	4.92765	5.44594	5.16776	5.3407	5.01254	4.94649	5.08988	4.92765	4.58439	4.99957	4.43529	4.81599	4.72073	4.63688	4.40987	4.87071	4.90857	5.02834	4.55605	4.69125	4.99052	4.86192	4.70606	4.50189	5.17043
1	euxassay_019497_11.jpg	NM_145151	233490	Crebzf	1110034C16Rik|6330417B10Rik|LAZip|LAZipII|SMILE|Zf	7569				1	5.69538	6.16329	5.58227	5.92511	6.10471	6.14785	6.45827	6.31542	6.46118	7.34436	7.12695	7.32509	7.39609	7.17099	6.98939	7.23241	7.03068	7.31707	7.12051	6.84683	5.56939	5.86724	6.02613	6.18439	5.77706	5.83203	6.18071	6.01585	6.12093	7.11107	7.33724	7.22796	7.05692	7.09592	7.30685	7.25546	7.20919	6.76075	6.89072
1	euxassay_000112_11.jpg	NM_023565	110750	Cse1l	2610100P18Rik|AA407533|Capts|Cas|Xpo2	7540				2	4.97373	5.29513	5.63495	5.59571	5.32457	5.38281	6.13145	5.91056	5.64093	5.56363	5.60091	6.14413	6.51373	6.402	6.53676	6.38488	5.95492	6.13145	6.24816	5.57808	5.19342	5.33482	5.3668	5.57232	5.04065	6.08632	5.82427	5.25491	5.53922	5.45193	5.67539	6.23449	6.63596	6.70695	6.46401	6.54521	6.2964	6.41225	6.28147
1	euxassay_000112_14.jpg	NM_023565	110750	Cse1l	2610100P18Rik|AA407533|Capts|Cas|Xpo2	7540				2	5.02102	5.42711	5.78832	6.11947	6.19032	5.77326	5.74165	6.10696	5.65002	6.15948	6.36015	6.3085	6.91505	7.19325	6.55549	6.48279	6.30971	6.72932	6.2799	6.26996	4.91077	5.32617	5.92343	5.95047	6.00057	5.49918	5.5582	5.69754	5.96808	6.61099	6.66016	6.42545	6.74495	6.76248	6.88797	6.63796	6.49422	6.08918	6.26872
1	euxassay_013347_11.jpg	AK220272	329942	Csmd2	B230311I21|B230378I17|Gm139|mKIAA1884	7469				1	3.67885	3.77371	4.02905	4.05339	3.59068	3.69956	3.7698	3.82739	4.31734	4.4686	4.45039	4.62359	4.59071	4.07098	4.10305	4.36817	4.34469	4.76708	4.51841	4.18993	3.26907	3.83677	3.51324	3.8918	3.65784	3.5929	3.81036	3.88096	4.47582	4.2431	3.98653	4.7659	4.67219	4.05949	3.99259	4.22978	3.96822	3.92243	4.46425
1	euxassay_011574_14.jpg	XM_129366	211660	Cspp1	2310020J12Rik|4930413O22Rik|AA387550|BC055915|Cspp2|Cspp3	7469				1	5.55351	6.04015	5.49835	5.46452	5.70957	6.12987	6.32101	6.34149	6.38232	6.06676	5.91961	5.81766	5.67853	5.86656	6.33413	6.52027	6.44775	6.20355	6.00778	6.28735	5.5708	5.65963	5.62756	5.43598	5.41546	5.80051	6.0394	5.88114	6.13791	6.0759	6.04427	5.72473	6.10141	6.06357	6.40268	6.31513	6.4118	6.52202	6.39666
1	euxassay_002070_14.jpg	NM_031249	83410	Cstf2t	64kDa|C77975|tCstF-64|tauCstF-64	7469				1	6.15483	6.72376	6.38488	6.11942	6.12019	6.28205	6.24625	6.84531	6.56259	6.74626	6.4806	6.88902	7.06034	6.94863	6.88338	7.07884	6.86539	6.65457	6.78627	6.98536	5.7555	6.45342	6.70307	6.27793	5.97186	6.34454	5.7164	5.93303	6.12517	6.59998	7.06972	6.67353	6.94842	7.06414	7.15711	6.72293	6.91028	6.49353	6.92117
1	euxassay_005276_14.jpg	NM_009818	12385	Ctnna1	2010010M04Rik|AA517462|AI988031|Catna1		marker			1	5.70343	5.48333	5.12292	5.27763	5.80434	5.33435	6.3121	6.26425	5.42109	6.80441	5.88521	6.19992	6.7506	6.95456	6.11072	6.36848	7.06802	6.62927	6.85676	6.48849	5.27526	5.42349	5.26518	5.35474	5.43844	5.41734	6.18311	6.33114	6.60313	6.37236	6.4165	6.16087	6.85445	6.86572	6.42834	6.56074	6.17166	6.94635	6.65521
1	euxassay_008607_11.jpg	NM_001004367	319478	Cxxc4	9330210J02Rik|C030003J12Rik|Idax|MGC90862	7469				1	4.92817	5.56143	5.18033	4.98748	4.42137	4.85065	4.46436	4.8608	5.41758	5.7692	5.68809	5.60325	6.0871	6.31089	5.35629	5.31327	5.7365	5.87468	6.08812	6.63336	4.82166	5.41383	4.93167	4.86356	4.74303	4.95684	5.12704	5.39871	5.83536	6.41029	5.66384	5.93252	6.22642	6.52056	5.77223	5.98306	5.57315	5.81386	6.24683
1	euxassay_005119_11.jpg	NM_025967	67102	D16Ertd472e	1700010I10Rik|2310009O17Rik|AI256766|AW536354|E330003K22Rik|Eurl	7569				1	3.95778	4.10477	4.10166	4.0018	3.97826	4.16558	4.63537	4.23646	4.34929	4.71666	4.65819	4.47138	4.54876	5.17989	5.28559	5.12858	5.23966	5.29705	4.99923	4.84603	3.61815	3.67573	3.94395	4.35505	4.34719	4.03966	4.25924	4.59835	4.28551	4.43504	4.73102	5.16329	4.95599	5.09333	5.09802	5.61748	5.23966	4.92096	4.78338
1	euxassay_001001_11.jpg	NM_011873	23994	Dazap2	AI314727|Brbp|Gcap28|MGC25222|Prtb|gt6-12|mKIAA0058	7569				1	6.34007	5.9389	5.77975	6.27325	6.4873	6.80298	6.97573	6.42772	6.64884	6.6507	6.76982	7.06163	7.16336	7.13079	6.99964	7.04623	6.90784	6.70031	6.49597	6.66694	6.65336	5.77195	6.12534	6.48372	6.58543	6.21403	6.87029	6.5765	6.96572	6.92628	6.69444	6.80513	6.82261	7.05301	6.80981	6.95434	6.88089	7.12253	7.05711
1	euxassay_012740_14.jpg	NM_013726	27214	Dbf4	AA545217|Ask	7569				1	4.18665	4.0188	4.46693	4.61912	4.64589	4.50272	4.41098	4.17909	4.54748	4.78307	5.0651	5.37553	5.73584	5.69775	5.41175	5.3443	5.11683	4.99897	4.65425	4.4652	4.30838	4.86995	4.84308	5.11143	4.32161	4.48443	4.70225	4.56226	4.42472	4.67636	5.07385	5.24212	5.41677	5.69929	5.45442	5.55104	5.0442	5.15032	5.44402
1	euxassay_007838_14.jpg	NM_023203	66422	Dctpp1	2410015N17Rik|AI854235|RS21-C6	7569				1	4.39647	4.47305	4.53774	4.95873	4.73923	4.59524	4.8973	5.03649	5.09707	5.97612	6.03516	5.71642	6.137	6.34652	6.03231	6.44701	6.37834	5.86774	5.2422	5.33089	4.44511	4.25391	4.48264	4.80951	4.93622	4.80283	5.0567	4.87471	4.92307	5.48009	5.80462	6.26514	6.07335	6.27	5.32677	6.46738	6.15795	6.0205	5.75026
1	euxassay_003952_11.jpg	NM_026993	69219	Ddah1	2410006N07Rik|2510015N06Rik|AI987801|AW050362	7569				1	3.53209	3.47763	3.51416	3.53209	3.56922	3.6626	3.71061	3.54784	3.79717	4.53526	4.62151	4.57423	5.04495	5.14875	4.80991	4.60561	5.84162	5.06584	4.7664	5.39593	3.47557	3.32375	3.50814	3.43168	3.39296	3.66981	3.55175	3.73662	3.96787	4.18485	4.65098	5.32638	4.83554	5.24981	5.28792	5.10518	5.15402	5.13969	4.85215
1	euxassay_009581_11.jpg	NM_178681	217480	Dgkb	6430574F24|90kda|C630029D13Rik|DAGK2|DGK|DGK-beta|mKIAA0718	7569				1	4.12432	3.94563	3.6286	3.60684	3.98473	3.97457	3.98135	3.78795	3.94191	4.21795	4.15486	4.26039	4.36003	4.30026	4.03937	4.25899	4.2921	4.41491	4.39854	3.94364	3.57132	3.95575	4.35481	3.85411	3.84112	3.65429	3.50932	3.34551	3.91382	3.87064	4.15185	4.20642	4.14281	4.41742	4.32313	4.17718	3.93494	4.34117	4.22082
1	euxassay_011628_11.jpg	NM_053272	74754	Dhcr24	2310076D10Rik|5830417J06Rik|mKIAA0018	7569				1	4.49585	4.95452	4.58271	4.542	5.32778	5.31495	5.2278	4.87372	4.95038	4.79622	5.07164	5.21145	5.6994	5.92141	5.87136	5.88932	5.73053	5.53004	5.2873	5.48851	4.75169	4.68471	4.81456	4.74094	5.11206	5.17109	5.00631	4.85501	5.14505	5.15409	5.20365	5.58517	5.74554	5.76749	5.58717	5.55957	5.65746	5.99124	6.04138
1	euxassay_001502_14.jpg	NM_028315	72662	Dis3	2810028N01Rik	7569				1	6.15965	5.7771	5.94634	6.09009	6.30633	6.7576	6.68066	6.23576	6.35134	6.03213	6.11111	6.46949	7.01208	6.68267	6.93949	6.81489	6.97954	6.77836	6.63358	6.77276	6.40512	6.00653	6.5503	6.2923	6.32541	6.50403	6.11277	6.12134	6.28652	6.68823	6.20939	6.52625	6.79561	6.61419	6.79045	7.21066	6.68557	6.52575	6.31297
1	euxassay_002042_11.jpg	NM_153530	208718	Dis3l2	4930429A22Rik|8030493P09Rik|MGC37640	7469				1	5.97807	6.05161	5.63198	5.04024	5.40238	5.16313	5.07948	5.05075	5.00656	5.54939	5.7424	5.87304	6.21229	6.28364	6.73793	6.93966	6.38877	5.89341	5.84961	6.10413	6.18076	5.99241	5.3756	5.17871	5.48404	5.30707	4.86796	5.18386	5.44593	5.95758	6.06404	6.28364	6.13912	6.21445	6.44382	6.61413	6.54285	6.53394	6.66846
1	euxassay_004715_11.jpg	NM_007865	13388	Dll1	Delta1	7569				1	4.97604	5.0853	5.60288	5.48971	5.16086	6.05263	5.95707	5.84082	6.49798	5.89378	5.89288	5.77292	6.07827	6.1192	7.24805	6.98145	6.74762	7.01406	7.38221	6.95585	4.87353	5.17361	5.32981	5.54029	5.53684	6.32387	6.44421	6.30922	5.9174	5.5123	5.12369	5.03194	5.67905	6.68018	7.07438	7.14705	7.4392	7.24012	6.85998
1	euxassay_008973_11.jpg	NM_175647	242523	Dmrta1	Dmrt4	7540		mouseTF		1	3.76521	3.44291	3.92677	3.65924	3.55626	3.57656	3.58549	3.55171	3.69269	3.70708	3.76128	4.31286	4.2871	4.51452	4.51918	4.51685	4.66848	4.67058	4.50866	3.64008	3.64008	3.51713	3.74344	3.56983	3.52875	3.49123	3.65288	3.75931	4.05124	3.91265	4.32758	4.13513	4.31502	4.11677	4.31018	4.30532	3.82261	4.36254	4.45168
1	euxassay_000078_11.jpg	NM_170778	99586	Dpyd	AI315208|DPD|E330028L06Rik|MGC37940	7540				1	5.14897	5.08523	4.9631	5.27603	5.27686	5.09277	5.26023	5.7186	6.00831	6.64566	6.62567	6.54934	6.36599	6.52169	6.14098	6.13369	6.29794	6.27194	6.44198	6.19252	4.99947	4.80388	5.18128	5.38975	5.3136	5.51772	5.31279	5.73615	5.61578	5.92317	6.39713	6.87464	6.32018	6.47668	6.58484	6.3826	6.40963	6.23846	6.1051
1	euxassay_001243_11.jpg	NM_023136	21915	Dtymk	AU044245|CDC8|D10Ertd203e|TMPK|TYPK|Tmk|mtmk	7569				1	4.93398	5.41816	5.35857	5.44837	5.37246	5.58766	5.38329	5.38521	5.63413	5.75283	5.96144	6.22591	6.45147	6.34704	6.5715	6.45696	6.37403	6.08583	5.61735	5.82105	5.21614	5.54767	5.48411	5.58774	5.52497	5.62209	5.71002	5.21182	5.21552	5.4128	6.29355	6.39091	6.25749	5.9318	6.1828	6.05039	5.87167	5.53792	5.66605
1	euxassay_003137_11.jpg	NM_023136	21915	Dtymk	AU044245|CDC8|D10Ertd203e|TMPK|TYPK|Tmk|mtmk	7569				1	5.28581	5.30368	5.3501	5.37687	5.44377	5.37832	5.42477	5.33975	5.47654	5.73989	5.80483	6.24365	6.4573	6.54893	6.23941	6.04016	5.99886	5.92314	5.81666	5.61743	5.07134	5.52956	5.34321	5.54724	5.36914	5.73	5.51499	5.43678	5.47281	5.72871	6.32388	6.42302	6.57583	6.35806	5.93853	5.82638	6.19697	6.20599	5.81503
1	euxassay_000304_11.jpg	NM_183389	278672	Duxbl	1110051B16Rik|Duxl|MGC67567	7469		mouseTF		1	6.15877	6.49365	6.26055	6.30217	6.18721	5.94904	5.93692	5.77291	6.08772	6.39062	6.60339	6.66709	6.57173	6.96913	6.79168	6.8362	6.60463	6.48759	6.62182	6.27996	6.18015	6.31068	6.35444	5.93391	5.84356	6.00252	6.0856	5.83348	6.10529	6.18732	6.36216	6.69984	6.59761	6.58306	6.52723	6.41289	6.43158	6.61366	6.77348
1	euxassay_014017_14.jpg	NM_029851	110350	Dync2h1	4432416O06Rik|AI448217|D030010H02Rik|D330044F14Rik|DHC1b|DHC2|Dnchc2|mKIAA1997	7569				1	5.06081	5.01905	5.02117	5.01197	5.26875	5.11534	5.2622	5.53487	5.49378	5.60571	5.98349	5.8205	5.96051	5.93628	5.86519	6.03899	5.54757	5.64742	5.22788	4.88778	4.79734	4.99985	5.04633	5.20747	5.13438	5.25612	5.32572	5.13285	5.27487	5.60359	5.42917	5.65487	5.51756	5.57753	6.00445	5.73731	5.76361	5.82003	5.69152
1	euxassay_009274_14.jpg	NM_198299	102124	E130303B06Rik	AI606951	7569				1	4.82014	4.85472	5.01037	5.30409	5.29119	4.92939	5.37147	5.44446	5.5377	5.96256	6.65648	6.71995	6.45074	6.45593	6.32142	6.31203	6.38065	5.7358	6.02437	6.23949	5.47026	5.16283	5.06885	5.01037	5.3907	5.17988	5.19163	5.28092	5.30206	5.81519	6.27076	6.2502	7.14852	6.72375	6.5635	6.10483	6.21503	6.37808	6.42081
1	euxassay_011832_11.jpg	NM_178609	52679	E2f7	A630014C11Rik|D10Ertd739e	7569		mouseTF		1	3.62819	3.8049	3.82765	3.82765	3.82577	4.18867	4.22227	4.49246	4.52346	4.65144	4.81754	4.72238	4.91001	4.96443	4.80956	4.82661	4.75123	4.67296	4.61003	4.34408	3.82389	3.67914	4.01778	4.05361	3.98272	4.1042	4.1042	4.28364	4.32288	4.72359	4.83543	4.9767	4.97975	4.96031	5.07032	4.83562	4.72116	4.51507	4.4269
1	euxassay_001897_14.jpg	NM_053119	93747	Echs1	C80529	7569				1	4.2836	4.7994	4.76738	4.57567	4.36494	4.42214	4.30267	4.71443	4.93396	5.10362	5.78412	6.34073	6.20572	5.91625	6.15136	6.02018	5.88675	5.79272	6.08112	5.91943	4.14096	4.39064	4.45052	4.4554	4.45418	4.5313	4.55536	4.60999	4.35453	4.87418	5.09192	5.71358	5.80482	5.9005	5.74729	6.42523	6.1646	6.02511	5.8835
1	euxassay_006215_11.jpg	NM_053119	93747	Echs1	C80529	7569				1	4.44982	4.84194	5.36801	4.95823	5.46772	5.29066	5.3177	5.2293	5.57361	5.78654	5.97502	6.28803	6.35614	6.86526	6.7769	6.69366	6.18898	6.25098	6.19519	5.71256	4.15303	4.55488	4.83634	5.50391	5.52645	5.00557	5.32105	5.46953	5.60139	5.61889	6.48103	6.66156	6.95305	6.4074	6.30671	6.36751	6.71594	6.59624	6.41525
1	euxassay_000978_11.jpg	NM_007904	13618	Ednrb	AU022549|ET-B|ET>B<|ETR-b|ETb|Sox10m1|s	7569				2	4.98232	5.17529	5.67487	5.6949	5.53913	5.65	5.64498	5.72205	5.95473	6.41516	7.23953	7.46209	7.15962	7.30065	7.11844	6.95966	6.8479	6.71689	6.7463	6.55185	5.14325	5.56307	5.66813	5.56935	5.4281	5.46538	5.79068	5.83588	5.92149	6.7484	7.28415	6.92612	7.1495	7.1719	7.0838	7.03757	6.75968	6.78945	6.62973
1	euxassay_000978_14.jpg	NM_007904	13618	Ednrb	AU022549|ET-B|ET>B<|ETR-b|ETb|Sox10m1|s	7569				2	5.86129	6.02384	5.75131	5.75057	5.87049	5.71668	5.72882	5.7446	5.85742	6.03231	6.55339	6.88101	7.14358	7.27824	7.14867	7.32198	6.99912	6.92091	6.79773	6.68112	4.82101	5.26802	5.4768	5.41352	5.57826	5.60946	5.66612	5.64192	5.67367	5.76139	6.14567	7.04318	7.15121	7.35221	7.2294	7.44759	7.29365	6.98843	7.09867
1	euxassay_002855_14.jpg	NM_007904	13618	Ednrb	AU022549|ET-B|ET>B<|ETR-b|ETb|Sox10m1|s	7569				2	5.36456	5.41878	5.31226	5.28785	5.61862	5.56342	5.41653	5.56206	5.71759	5.60023	5.87173	6.45468	7.18189	7.4468	6.95057	7.2196	7.23713	7.08274	6.85943	6.85701	5.28731	5.37168	5.40485	5.39345	5.35832	5.56477	5.43665	5.58829	5.71271	6.36379	7.08226	6.96398	6.95368	6.98337	7.19836	7.2755	7.16725	6.93073	7.16635
1	euxassay_018017_14.jpg	NM_010110	13641	Efnb1	Cek5-L|EFL-3|Elk-L|Epl2|Eplg2|LERK-2|Lerk2|Stra1	7569				1	5.41872	5.54974	6.05789	5.85128	5.84516	5.99694	6.11543	6.12695	6.23475	6.6964	7.01468	7.2498	7.45357	7.42214	7.47675	7.13458	7.43313	7.52302	7.3518	7.30948	5.2266	5.85128	5.85848	5.84516	5.64123	6.11913	5.78014	5.82946	5.7877	6.07463	7.06654	7.39982	7.34812	7.47698	7.58005	7.06475	7.27626	7.50615	7.51362
1	euxassay_019479_11.jpg	NM_010132	13797	Emx2	Pdo	7569	marker	mouseTF		1	5.88961	5.9186	5.88374	5.82179	5.76052	5.82651	5.82557	5.92873	6.01925	5.68412	6.24209	6.568	6.50439	6.40196	6.74357	6.70209	6.70311	6.70157	6.83697	6.72853	5.93747	5.90797	5.99892	5.79462	5.8373	5.59462	5.90797	6.04173	6.0754	6.06266	5.92829	6.40038	6.31033	6.50085	6.7743	6.66986	6.60646	6.57014	6.43439
1	euxassay_001555_11.jpg	NM_145951	209224	Enox2	AI314192|APK1|Cova1|MGC32453|tNOX	7569				1	5.07189	4.86082	4.83746	4.76856	5.23655	5.37355	5.57058	5.52047	5.79965	6.22049	6.03786	6.24775	5.89755	6.38776	6.14095	6.68044	5.65062	6.42461	7.03019	6.40204	4.62523	4.83858	4.82281	4.74005	4.86192	4.75912	5.30221	5.3828	5.45474	6.19139	6.08301	5.89108	5.98417	6.58382	6.18656	6.12266	6.78763	6.23928	6.41488
1	euxassay_005655_14.jpg	NM_007943	13858	Eps15	2410112D09Rik	7569				1	4.15303	4.82507	4.55877	4.83297	4.68752	4.01707	4.26732	5.77658	5.17488	5.42482	5.4878	4.90349	5.25786	5.41359	5.33037	5.44888	5.6378	5.46621	5.12751	5.34425	4.71708	4.6433	4.7861	4.99455	4.752	4.38247	4.51877	5.43227	5.04373	5.30526	5.83461	5.18923	4.9418	5.0352	5.04979	5.18703	5.6281	5.34622	5.1969
1	euxassay_001758_11.jpg	NM_007951	13877	Erh	MGC103398|MGC130271|MGC130272|Mer|Prei1	7569				1	5.73365	5.32152	5.63549	5.08934	5.42153	5.18718	5.64032	5.30133	5.34406	5.21549	5.84567	6.30019	6.11022	6.43598	6.59339	6.25312	6.49659	6.17451	5.2708	5.9108	5.19886	5.19522	5.5203	5.69704	5.5474	5.04632	5.25451	5.60573	5.07165	5.64854	5.35937	5.565	6.29944	6.18953	6.36625	6.37013	5.87464	6.09842	5.83812
1	euxassay_001929_11.jpg	XM_619731	208618	Etl4	6620402G01Rik|9430077C05Rik|BC026657|E330027G05Rik|Etl-4|Skt	7540				1	4.33196	3.90963	3.86475	3.93381	3.72107	3.76216	3.76216	3.76216	3.92227	4.02759	4.40962	4.21332	4.5946	4.64672	4.41839	4.26704	4.34536	3.97759	4.13793	4.39953	3.61853	3.76216	3.76216	3.76553	3.84417	3.64257	3.65716	3.74689	3.84576	4.1006	4.27633	4.68253	4.30132	4.13185	4.32017	4.68565	4.02267	4.15603	4.40962
1	euxassay_009157_14.jpg	NM_010171	14066	F3	AA409063|CD142|Cf-3|Cf3|TF	7569				1	4.29279	4.06958	4.12072	4.17201	4.35155	4.6718	4.44283	4.17793	4.41805	4.28047	4.95023	4.8602	4.72934	5.31416	4.92846	4.83233	5.02844	5.19085	4.81914	4.88663	4.05587	4.44668	4.09794	4.13099	3.95907	4.18529	4.46477	4.24568	4.31175	4.3198	4.67703	5.74616	5.25242	4.9433	5.08935	5.29592	5.18352	4.72024	5.19815
1	euxassay_008461_11.jpg	NM_021416	58227	Fam184b	9630031F12Rik|AB041544|KIAA1276	7557|7569				1	4.16053	4.59682	5.551	4.72155	4.34668	4.43801	4.6328	4.28361	4.30485	4.23165	4.1813	4.712	5.52594	5.55077	5.14424	5.28738	5.3711	5.41459	4.4903	4.76248	4.64673	5.03276	5.35735	4.32018	4.32818	4.48076	4.47236	4.89229	4.67483	5.01536	4.73866	5.92093	5.90818	6.12074	5.67895	5.44214	5.49499	5.3796	5.0477
1	euxassay_003359_11.jpg	NM_146261	245622	Fam199x	MGC19245	7569				2	5.23722	5.20369	5.22356	5.46261	5.51332	5.56164	5.10932	5.11118	5.12319	5.2227	5.55415	5.95438	6.11934	5.98254	6.30108	6.33603	6.25439	6.10823	6.32087	6.25271	5.19846	5.13692	5.2996	5.5084	5.15683	5.0878	5.18706	5.36407	5.43915	5.48783	5.44946	5.59717	5.8218	5.95954	6.13767	6.15217	6.06626	6.36899	6.12348
1	euxassay_007350_11.jpg	NM_144526	109212	Fam64a	2610008F03Rik|6720460F02Rik|AI115087|CATS	7569				1	3.69761	3.56844	3.71602	3.58635	3.52733	3.70172	3.72211	3.63232	3.86097	4.14239	4.96931	5.00801	5.80651	6.02656	4.98136	4.4098	5.22627	4.57493	5.28254	5.21509	3.72442	4.10451	3.70582	3.75216	3.69141	4.25021	3.65582	3.66006	3.59743	3.67896	5.20339	4.97441	4.98542	5.48329	6.36814	6.04505	5.84252	5.40348	5.37028
1	euxassay_013427_11.jpg	NM_173770	240479	Fam69c	B230399E16Rik	7569				1	4.11653	3.73145	3.68235	3.91571	4.12705	3.94872	4.08314	4.06956	4.15174	3.87883	4.31711	4.16966	4.31596	3.87102	4.28458	4.19156	4.48075	4.35583	4.13945	3.94673	4.12311	4.07637	3.98677	3.7806	3.61853	3.75369	3.88038	3.88504	4.11124	4.07773	4.05172	4.4191	4.13228	4.22337	4.27278	4.03506	4.04873	4.27534	4.11036
1	euxassay_005185_14.jpg	NM_134469	110196	Fdps	6030492I17Rik|AI256750|Fdpsl1|MGC107162|mKIAA1293	7469				1	4.74814	5.30797	5.57221	5.617	5.61917	6.13773	5.56264	5.63807	5.77024	5.34327	6.24483	6.60519	6.11671	6.57888	6.7848	6.15658	5.65673	6.05937	6.46585	5.74914	4.84521	4.9749	5.68556	5.78291	5.84372	5.55641	5.5632	5.58841	5.49256	5.91231	6.28238	6.03391	6.70996	6.50609	7.01375	6.16888	6.07134	6.16218	6.1888
1	euxassay_000173_11.jpg	NM_028263	72514	Fgfbp3	2610306H15Rik|Fgf-bp3	7540				2	4.21272	4.05451	3.9233	3.89843	4.41161	4.65902	4.71807	4.62738	4.46412	4.76344	5.80519	6.42336	6.93866	6.81028	6.5837	6.9781	6.92474	6.65288	6.81626	6.2756	4.61391	4.48503	4.70174	4.57184	4.4091	4.54325	4.30779	4.64286	4.77519	5.0839	5.88004	6.47076	6.53198	6.98748	7.26933	7.11876	7.29119	7.01897	6.45733
1	euxassay_000173_14.jpg	NM_028263	72514	Fgfbp3	2610306H15Rik|Fgf-bp3	7540				2	5.50633	5.6361	5.62985	5.46253	5.64082	5.63373	5.74551	5.55067	5.32694	5.57307	6.33281	6.73253	6.40117	6.65161	6.72679	6.94519	6.88841	6.87016	7.04906	6.81969	5.37408	5.81995	5.73872	5.84712	5.88106	5.61499	5.81853	5.99854	6.08294	6.847	6.99089	7.22231	6.9638	6.97097	6.92791	7.12361	7.03104	6.6769	6.76826
1	euxassay_008201_11.jpg	NM_054071	116701	Fgfrl1	FGFR5|FGFR5beta|FGFR5gamma	7569				1	5.35006	4.99543	5.23133	5.61936	5.40658	5.74223	5.38692	5.64147	5.63288	5.81617	6.65597	6.08807	6.26468	6.46196	6.48612	6.37888	6.25757	6.44219	6.1854	5.92544	4.20299	5.02773	5.14487	5.3592	5.26299	5.24408	5.26368	5.6079	5.51572	5.89954	6.37907	6.24001	6.43046	6.4255	6.48547	6.67335	6.70565	6.61926	6.13657
1	euxassay_002052_14.jpg	NM_010211	14199	Fhl1	KyoT	7469				1	5.55059	6.02933	5.37097	5.33236	5.43103	5.81861	5.69358	5.54871	5.358	6.04952	6.83352	6.46902	7.02045	6.98377	6.36135	6.39126	6.87644	6.80034	6.8907	7.2121	5.601	6.13997	5.61835	5.99599	5.93216	5.35464	5.23266	5.56348	5.36125	6.20028	6.34666	6.70804	6.4663	6.97318	7.14743	6.71289	6.8925	7.09855	7.13208
1	euxassay_003444_11.jpg	NM_011813	23877	Fiz1	AI790204|FLJ00416|MGC117900|mFLJ00416	7569				1	4.74405	5.42632	5.66617	5.51172	5.90853	5.78373	5.7573	6.03126	6.0337	5.93393	6.06229	6.18634	6.33948	6.13799	6.505	6.60851	6.66236	6.25763	5.92815	5.75374	4.76778	5.10782	5.46009	5.52941	5.7442	5.64326	5.77146	5.91811	5.63038	5.63683	5.97528	6.24711	6.5152	6.64772	6.57796	6.48151	6.17263	6.32316	6.1284
1	euxassay_014002_14.jpg	XM_977402	286940	Flnb	AL024016	7569				1	5.13669	5.30202	5.24726	5.06194	4.90961	4.80455	4.93341	4.92156	5.12302	5.09983	5.9278	6.26029	6.39781	6.31088	6.26967	6.43881	6.2764	6.48942	6.8554	6.72964	5.02843	4.94589	4.90486	4.80455	4.94777	5.19972	4.93341	4.96712	5.06374	5.06014	5.63262	6.17245	6.1155	5.99971	6.66278	6.68613	6.54841	6.46558	5.69468
1	euxassay_001464_11.jpg	NM_010233	14268	Fn1	E330027I09|Fn|Fn-1|MGC117493	7569				1	5.71239	5.73011	5.55365	5.81987	5.6403	5.45965	5.63923	5.15182	5.34088	6.49107	6.69883	6.59852	6.88828	7.22063	7.21697	6.7154	6.83845	6.63285	6.44912	6.59455	5.46631	5.18495	5.35778	5.6198	5.2774	5.74364	5.66579	5.52377	5.77715	5.77667	6.28161	6.65942	6.8187	7.0154	7.04045	7.12855	6.96111	7.10801	7.09775
1	euxassay_004217_11.jpg	NM_011817	23882	Gadd45g	AI327420|C86281|CR6|DDIT2|OIG37	7569				1	3.74235	3.43241	3.43241	3.43241	3.43241	3.27572	3.30845	3.43241	3.43241	3.43241	3.46906	3.70245	3.80541	3.67761	4.01657	4.48826	4.59934	4.52586	4.5013	3.9764	3.50682	3.52484	3.43241	3.43241	3.43241	3.43241	3.43241	3.43241	3.41963	3.69893	3.78617	3.69008	4.0248	3.63738	3.98317	4.27299	4.44599	4.99748	5.17952
1	euxassay_011719_11.jpg	XM_283069	108760	Galntl1	5730405L21Rik|AI415388|mpp-GalNAc-T16	7569				2	4.08944	4.11742	4.23761	4.03181	3.81464	3.87832	3.91976	3.64563	3.66742	3.9834	4.07185	4.462	4.43684	4.73994	4.65614	4.48876	4.63617	4.28517	4.50466	4.34292	3.78505	4.2509	4.32704	3.74974	3.88143	4.14227	4.12924	3.91976	4.19573	3.90761	4.1161	4.2712	4.5633	4.68847	4.45157	4.94788	4.35864	4.3716	4.33632
1	euxassay_007193_11.jpg	AY033907	67367	Gcfc1	1810007M14Rik|C21orf66|Gcfc	7469				1	6.26261	6.45102	6.53293	6.33071	6.3812	5.89696	6.13966	5.865	6.48121	6.54526	6.23638	6.40097	6.3155	6.08698	6.25224	5.97613	6.15155	6.58212	6.92883	6.43286	5.22238	6.29073	6.18454	6.02679	6.15109	6.0958	5.86225	5.8196	6.2101	6.33846	6.18498	6.70244	6.43749	6.64513	6.76605	6.92058	6.43054	6.07098	6.45176
1	euxassay_005077_11.jpg	NM_026572	68133	Gcsh	1100001L02Rik|5730591C18Rik	7569				1	4.41236	4.44532	4.28306	4.20947	4.23279	4.13713	4.08949	4.0841	4.26888	4.48779	4.67736	5.08094	5.04498	5.0841	5.02132	5.0031	5.04983	5.06427	4.96084	4.53481	4.461	4.17438	4.09218	4.46826	4.34409	3.97911	3.9878	4.11483	4.17438	4.42947	4.49593	4.59874	4.67333	5.41674	4.92698	4.96426	4.98887	4.809	4.89681
1	euxassay_003192_14.jpg	NM_010276	14579	Gem	AV020497	7569				1	4.95637	5.12019	4.8995	5.0406	4.8109	4.88439	4.92294	5.16913	5.40304	5.69711	5.85083	5.66034	5.68548	5.24019	5.45	5.85292	5.87494	5.34546	5.2199	5.2861	4.6155	4.77856	4.71529	4.63369	4.83694	4.75501	4.8995	5.2789	5.39087	5.67626	5.42783	5.23104	5.32601	5.41436	5.48979	5.7005	5.86025	5.52503	5.54834
1	euxassay_007703_11.jpg	NM_031408	57330	Gigyf1	KIAA4110|Perq1|mKIAA4110	7469				1	5.77856	5.46745	5.69851	5.44983	5.64932	5.52614	5.26612	5.58209	5.82426	5.87812	5.8299	5.68725	5.53515	5.70702	5.96332	6.1296	5.69097	5.83721	5.84113	5.89169	5.02256	5.31203	5.88366	5.20601	5.42455	5.36809	5.38354	5.62786	5.90477	5.8456	5.85283	5.78468	5.76771	6.09906	5.89492	6.02271	5.89385	6.03792	5.90833
1	euxassay_001245_11.jpg	NM_010290	14617	Gjd2	Gja9|connexin36|cx36	7557				1	5.74175	6.32712	6.21398	6.39536	6.27321	5.77287	5.63451	5.84017	6.17013	6.13977	6.0699	6.53241	6.63234	6.5128	6.38228	6.43573	6.58066	6.46808	6.28217	6.16791	5.64095	5.72972	5.6248	5.75591	5.67977	5.5343	5.82681	5.84366	5.81405	6.02198	6.118	6.44035	6.52067	6.87528	6.5717	6.49617	6.38995	6.54219	6.48845
1	euxassay_014439_14.jpg	NM_133236	170772	Glcci1	2310047L21Rik|A130036A18Rik|Fam117c|Gig18|Tssn1	7569				1	4.95374	4.23507	4.09335	4.79617	4.65151	4.6442	4.48629	4.81623	4.89735	4.96307	4.77779	4.92136	5.08615	4.87112	4.96563	4.98094	5.05916	5.0061	5.19882	5.40582	4.6202	4.95448	4.84719	4.67501	4.45462	4.49377	4.46191	4.6146	4.79232	5.01357	5.07747	5.28357	5.0061	5.25377	5.35123	4.77681	5.10878	5.52375	5.02428
1	euxassay_018378_11.jpg	NM_008130	14634	Gli3	AI854843|AU023367|Bph|GLI3-190|GLI3FL|Pdn|Xt|add	7569		mouseTF		2	4.31323	3.87494	4.27027	3.57381	3.36213	3.52417	3.92461	4.10976	3.41864	3.6127	3.60708	4.14901	4.24513	4.56737	4.58083	5.15244	5.57907	5.80313	5.86455	5.59858	3.72542	4.32727	3.73297	3.36213	3.46914	4.50104	3.72995	3.84398	4.2667	3.92762	3.97353	4.0612	4.63068	4.99043	5.25734	5.58481	5.50889	5.62109	5.81782
1	euxassay_018378_14.jpg	NM_008130	14634	Gli3	AI854843|AU023367|Bph|GLI3-190|GLI3FL|Pdn|Xt|add	7569		mouseTF		2	2.92459	4.20366	3.85429	4.0166	4.27025	3.46186	3.43494	3.78039	3.60046	4.28403	4.14598	4.13537	4.48829	5.10154	5.22739	5.49126	5.78136	5.37761	5.32393	4.9933	0	3.85982	4.28266	3.87629	4.31389	3.03953	4.02483	3.90154	3.89975	4.00333	4.13386	4.27302	4.43123	4.74794	5.21234	5.44294	5.37504	5.24793	5.37697
1	euxassay_011632_14.jpg	NM_008138	14678	Gnai2	C76432|Galphai2|Gia|Gnai-2	7569				1	5.8377	5.24164	5.48583	5.37895	5.46639	5.80882	5.32558	5.56042	5.71184	6.22735	6.36945	6.43872	6.76452	7.08877	7.13079	6.89389	6.54555	6.9299	7.0521	6.96208	6.01853	5.37045	5.45912	5.49226	5.46421	5.48798	5.20648	5.53783	6.04855	5.82079	6.33015	6.85676	6.7914	7.0141	7.08051	7.11422	6.65807	7.07291	7.18775
1	euxassay_006219_11.jpg	NM_153547	30877	Gnl3	BC037996|C77032|MGC46970|Ns	7569				1	4.59331	5.00127	5.18119	5.07785	5.57384	4.48601	4.65369	4.67357	4.97821	5.74856	6.22212	5.9586	5.65675	6.05015	5.57504	6.42509	6.04003	6.40537	6.05296	5.45532	4.66186	5.31549	5.4192	5.61133	5.43137	4.61279	4.83499	5.00935	4.97494	5.52718	5.87776	6.00427	6.22427	5.93172	5.78729	6.10202	6.68267	6.39557	6.02205
1	euxassay_007466_14.jpg	NM_016696	14733	Gpc1	AI462976	7569				1	5.57336	6.53417	6.63439	5.79988	5.61507	6.0667	6.60857	6.62258	6.33639	6.74655	6.86875	6.83271	6.83482	7.10799	6.65218	6.70178	7.03163	6.8474	7.06154	6.94083	6.57702	6.17936	5.80563	5.94075	6.31632	6.02821	6.25467	6.49459	6.54439	6.76161	6.78215	7.02221	7.15561	6.99984	6.79399	7.29738	7.30196	7.07131	6.64151
1	euxassay_011267_11.jpg	XM_142154	245607	Gprasp2	5330440H13Rik|GASP2|Prpl5	7557				1	4.25562	4.35766	4.41739	4.34982	4.27727	4.33719	4.36078	4.59238	4.47042	4.54235	4.74365	4.51877	4.73163	4.74065	4.63655	4.83353	4.67471	4.7994	4.67941	4.77472	4.07147	4.68129	4.91496	4.57635	4.08665	4.05228	4.06956	4.22165	4.23873	4.3561	4.78958	4.69867	4.61218	4.87727	4.50331	4.37939	4.71464	4.53684	4.69991
1	euxassay_003194_11.jpg	NM_173866	108682	Gpt2	4631422C05Rik|ALT2|AU014768|AU041193|C87201	7569				1	4.78359	4.767	5.18197	5.33939	5.14847	4.74625	4.99774	4.59085	4.80286	5.33608	5.58902	5.69235	5.77078	5.22403	5.1356	5.44128	5.51078	5.3906	5.08061	5.46507	4.39868	5.21553	5.00061	4.71171	4.94445	4.76237	4.68733	4.70485	4.6925	4.76406	5.29924	5.30533	5.25515	5.46204	5.41272	5.67572	5.09083	4.71302	4.73124
1	euxassay_003757_11.jpg	NM_027127	69590	Gpx8	2310016C16Rik|AU017063	7469				1	5.00304	4.87323	4.88684	5.13221	4.82353	4.73601	4.9039	4.76577	5.0052	5.2707	5.80461	6.32	6.20911	5.91711	5.88493	5.98853	6.13623	6.15794	6.56044	5.61941	5.04248	4.92955	4.80892	5.06772	5.0032	4.67205	4.58657	5.0658	5.37326	5.48557	6.32681	6.16198	6.12341	6.25391	6.43489	6.18243	6.34546	6.43748	6.50469
1	euxassay_011372_11.jpg	NM_010345	14783	Grb10	5730571D09Rik|AI325020|Meg1|mKIAA0207	7569				1	5.71099	5.75988	5.37727	5.67177	5.63584	5.7147	5.39316	6.0731	5.91699	6.37905	6.43305	6.94541	6.70056	7.05985	7.22783	7.23073	7.31943	7.27857	7.38789	7.4038	6.14111	5.54882	5.3849	5.4728	5.7521	5.71519	5.65483	5.88077	6.62966	6.70562	7.36501	7.2824	7.03474	7.3371	7.44433	7.03701	7.50937	7.29237	7.27162
1	euxassay_008176_11.jpg	XM_485455	72690	Grrp1	2810043G13Rik	7569				1	4.92943	4.81451	4.92152	5.06849	5.13956	5.161	5.43649	5.6606	5.86419	5.69039	5.80306	6.42487	6.65861	6.75637	6.62612	6.46534	6.37488	6.00563	5.90043	5.84014	4.76378	4.98617	5.29259	5.5833	5.60734	5.49719	5.68027	5.93009	5.8772	6.06968	6.19968	6.50118	6.4216	6.53009	6.29105	6.44525	6.39851	6.1801	6.35674
1	euxassay_001978_11.jpg	NM_010357	14860	Gsta4	GST5.7|mGsta4	7569				2	3.37786	3.02761	3.16798	3.43579	3.2489	3.35193	3.33878	3.47236	3.51037	3.46027	3.95134	4.00558	4.60304	4.52513	4.31865	4.3645	4.73931	4.88856	4.39225	4.40592	3.36495	3.17982	3.27949	3.2959	3.42339	3.54053	3.37013	3.2959	3.37786	3.76543	4.04819	4.58223	4.41947	4.65911	4.49393	4.33144	3.951	4.04139	4.16984
1	euxassay_001978_14.jpg	NM_010357	14860	Gsta4	GST5.7|mGsta4	7569				2	3.20451	2.92386	2.9168	3.15138	3.32404	3.28346	3.43195	3.2752	3.28346	3.56431	3.56205	3.69383	3.72245	3.5507	3.96585	4.14416	3.78387	3.95556	4.22923	4.04406	2.80656	2.77177	2.78346	2.93788	3.10244	3.0421	3.08681	3.14233	3.26412	3.33732	3.45162	3.61316	3.84091	3.88498	3.7916	3.80505	4.36378	3.93125	3.82968
1	euxassay_004740_11.jpg	NM_010357	14860	Gsta4	GST5.7|mGsta4	7569				2	3.51861	3.41972	3.36631	3.44937	3.49273	3.49273	3.44447	3.63501	3.5069	3.87787	4.00977	4.24774	3.86142	4.22507	5.59133	4.32762	4.06572	4.71706	4.44708	4.6586	3.43038	3.35852	3.57574	3.52558	3.54403	3.35852	3.37406	3.52326	3.59576	3.78402	4.17566	4.44952	3.94185	4.21071	3.88512	4.77832	4.96951	4.30022	3.95742
1	euxassay_004740_14.jpg	NM_010357	14860	Gsta4	GST5.7|mGsta4	7569				2	3.238	3.44646	3.53486	3.81778	3.79255	3.43761	3.40166	3.41974	3.39253	4.04453	4.50331	3.74791	4.08476	3.80866	4.13854	4.28057	3.52932	4.44709	4.04258	4.71036	3.31035	3.40166	3.40166	3.40166	3.40166	3.40166	3.40166	3.40166	3.66187	3.88225	3.94812	4.73645	4.30349	3.8381	3.71655	4.34824	4.12758	4.2472	4.03869
1	euxassay_006220_11.jpg	NM_010357	14860	Gsta4	GST5.7|mGsta4	7569				1	4.05196	3.93281	4.3295	4.93221	4.88145	4.30673	3.96909	4.59901	4.29453	4.36494	5.0064	4.81941	5.3495	5.87796	4.90839	5.14649	5.11985	5.62594	4.752	5.01154	4.47114	4.37913	4.14248	4.29996	4.47475	4.7859	4.37012	4.39953	4.41964	4.75556	4.84101	5.15327	5.41672	5.90541	5.21355	5.03602	5.22859	5.04495	5.09114
1	euxassay_018933_11.jpg	NM_010357	14860	Gsta4	GST5.7|mGsta4	7569				1	4.35658	4.39213	4.732	4.82993	4.6501	4.85563	4.89818	4.82429	4.93008	5.06358	5.10725	4.9835	4.80721	5.22229	5.43268	5.56385	5.79867	5.38457	5.47654	5.34272	4.2494	4.66281	4.97052	4.50515	4.47519	4.65774	4.551	4.90275	4.95794	5.17869	5.3555	5.03085	5.0767	5.10725	4.95665	5.28324	5.3437	5.57062	5.8586
1	euxassay_018935_11.jpg	NM_010360	14866	Gstm5	-	7569				1	5.33467	4.97573	5.22922	5.1393	5.26635	5.60616	5.53396	5.70596	5.99245	6.53267	6.64224	6.84792	6.90086	6.7039	6.55373	6.75451	7.01556	7.1146	6.8378	6.80556	5.25043	5.22323	5.273	5.48469	5.48755	6.10944	6.06272	5.9737	6.37155	6.46814	6.63646	6.60255	6.74625	6.57086	6.45577	6.5292	6.97536	6.96834	6.8223
1	euxassay_010704_11.jpg	XM_907680	77605	H2afv	C530002L11Rik|H2av	7569				1	3.81386	3.6575	3.73522	3.72832	4.51054	3.90075	4.09282	4.68537	4.22727	4.79433	5.01447	5.10186	4.87485	5.16726	4.72632	4.87303	4.53215	4.58654	4.08182	3.69098	4.37622	3.77535	3.84765	3.62322	3.41358	4.00902	4.21438	4.11303	4.2115	4.97509	4.54937	5.06801	5.15232	4.98524	5.53249	5.96767	4.93198	5.19451	4.55392
1	euxassay_009209_14.jpg	NM_019975	56794	Hacl1	1600020H07Rik|Hpcl|Phyh2	7569				1	4.22905	4.27709	4.57773	4.45989	5.15679	4.92241	4.4826	4.49484	4.76708	4.76048	4.7042	5.14497	5.57135	5.89242	5.60138	5.4671	5.54699	5.47433	5.18003	5.20993	4.07317	4.61652	4.62953	5.0188	4.48567	4.4442	4.48158	4.39171	4.82236	4.7696	5.14259	5.92902	5.98288	6.06658	5.55497	5.82474	5.69975	4.97954	5.38637
1	euxassay_001268_11.jpg	NM_146089	225745	Haus1	BC024400|Ccdc5|HEI-C|MGC36238	7569				1	4.96366	5.20223	5.46126	5.19568	5.51191	5.21739	5.23381	5.28199	5.49601	5.3834	5.41317	5.36795	5.53745	6.04966	6.3885	6.10737	6.05649	5.97814	5.7867	5.5311	5.19714	5.22384	5.37376	5.41693	5.11472	5.02485	4.99918	5.1293	4.995	5.2044	5.26541	5.66561	5.78815	6.41222	6.26436	6.80066	6.28095	6.42521	5.74785
1	euxassay_003161_11.jpg	NM_146089	225745	Haus1	BC024400|Ccdc5|HEI-C|MGC36238	7569				1	5.13789	5.29722	5.45049	5.11572	4.87385	5.20244	5.10567	5.18419	5.38487	5.13029	5.63706	5.73211	5.93874	6.40193	6.23993	6.39305	5.79409	6.20834	5.71298	4.97211	4.86379	5.14773	5.23118	5.36944	5.0932	5.28356	5.13789	5.27806	4.93276	5.25446	5.74063	5.33278	6.31929	6.33328	6.2519	6.12811	5.83426	5.92675	5.80588
1	euxassay_002405_11.jpg	NM_008231	15191	Hdgf	AI118077|D3Ertd299e	7569				2	4.41481	4.90367	5.21056	4.78907	4.63524	5.12773	5.48707	5.87764	5.60209	5.47451	5.11853	5.47451	5.81637	5.58772	6.17325	6.01245	5.55741	5.78909	5.59824	5.80543	5.01551	5.04008	5.13372	4.83312	4.88442	4.87274	5.34396	4.94886	5.11622	5.69682	5.78183	4.88623	5.87991	5.74743	5.71677	5.61251	5.90241	6.0004	5.7828
1	euxassay_002405_14.jpg	NM_008231	15191	Hdgf	AI118077|D3Ertd299e	7569				2	4.9256	5.05661	5.19213	5.18774	5.27829	5.00388	5.4695	5.60494	6.08043	5.95813	5.60494	6.6701	6.19754	5.46679	5.96328	5.90762	5.92488	5.56994	5.91318	5.85066	5.27395	5.58571	5.0619	5.14125	5.51876	5.58905	5.27829	5.41888	5.29165	5.40287	6.14131	5.63348	6.06794	6.36248	5.74304	6.17996	6.67482	6.74748	5.80241
1	euxassay_000061_11.jpg	NM_144835	217995	Heatr1	AA517551|B130016L12Rik|BC019693|MGC30806	7569				1	5.67294	5.95677	6.09958	6.50014	6.33588	6.32991	6.22739	6.3159	6.47513	6.25584	6.26796	6.48178	6.56405	6.63221	6.96881	6.9526	7.08033	6.97494	6.97672	6.50632	6.22632	6.15799	6.11932	6.43277	6.4247	6.51686	6.47362	6.63124	5.90242	6.07205	6.03423	6.52663	6.80013	6.79321	6.53253	6.42955	6.82041	6.8485	6.65561
1	euxassay_005510_11.jpg	NM_175256	77446	Heg1	4632417D23Rik|5530401I02Rik|9530025L16Rik|BC038614|Gm629|OTTMUSG00000027315	7569				1	4.5819	5.432	5.0799	5.38016	5.60618	5.96663	5.48971	6.35218	6.15194	6.19821	6.36862	6.36168	6.48364	6.37397	6.79121	6.50858	6.84867	6.40835	5.94325	6.05877	4.88675	5.65426	5.61415	5.33662	5.3496	6.03841	5.85197	6.13737	5.67816	6.23272	6.556	6.80942	6.53418	6.239	5.97969	6.66394	6.74189	6.33777	6.01317
1	euxassay_019489_11.jpg	NM_008235	15205	Hes1	Hry|bHLHb39	7569	marker	mouseTF		1	5.12898	5.1517	5.21694	5.29822	5.08148	4.94659	4.99866	5.02155	4.95798	5.04213	5.20917	6.03595	6.62015	6.3254	5.71068	6.27081	6.71993	6.55072	6.66128	6.04107	4.78388	4.73054	5.05183	5.11517	5.04213	5.01363	4.97643	4.83533	4.80468	4.95178	5.12439	5.89491	6.47669	6.33575	6.02023	6.01081	6.0538	5.99469	5.80917
1	euxassay_006639_14.jpg	NM_019479	55927	Hes6	AI326893|bHLHb41	7569				1	6.92762	6.67577	6.49001	6.67995	6.68073	6.67106	6.5993	6.64967	6.90907	6.91085	6.96724	6.99787	7.25543	7.26415	7.36532	7.33724	7.1329	7.31647	7.04484	6.92543	6.79147	6.78107	6.61629	6.73917	6.55368	6.68852	6.80348	6.92058	6.60672	6.75409	6.60535	7.10558	6.96082	6.76445	7.22085	6.71236	6.99343	7.07392	6.97341
1	euxassay_003865_11.jpg	NM_010441	15364	Hmga2	9430083A20Rik|HMGI-C|Hmgic|MGC103393|pg|pygmy	7569		mouseTF		1	4.78438	4.97919	4.85888	4.98064	5.10629	5.09561	4.79184	4.71806	4.86282	5.24981	5.95867	5.9379	6.12998	6.29568	5.61056	6.11519	6.78748	5.97144	5.99215	5.70621	4.84061	4.91308	4.80665	4.78853	4.89242	4.88314	5.01292	5.31166	5.61897	5.94014	6.02206	6.0838	5.96888	6.12671	6.60466	6.49667	5.82266	5.52777	5.51556
1	euxassay_006441_11.jpg	NM_011020	18415	Hspa4l	94kDa|AI461691|APG-1|MGC117843|Osp94	7557|7569				1	5.06424	5.52465	5.2957	4.86192	4.84974	5.34622	5.41321	5.72524	5.39504	6.18612	6.65712	6.77598	6.08348	6.71869	6.0976	6.31533	6.50482	6.30928	6.22992	5.85968	4.66474	6.06077	5.46227	5.40163	5.54127	5.52605	5.09082	6.0976	5.95449	6.42162	6.04758	6.03883	6.62338	6.44683	6.34797	5.72947	6.51887	5.99627	6.14458
1	euxassay_013741_14.jpg	NM_031156	15925	Ide	1300012G03Rik|4833415K22Rik|AA675336|AI507533	7569				1	4.03305	4.33061	4.41944	4.43619	4.67611	4.76132	4.41944	4.57717	4.66509	4.77895	4.92329	5.62233	6.00022	5.86992	5.63851	5.64654	5.81545	5.92636	5.78573	5.46005	4.55518	4.92461	4.74498	4.52591	4.57044	4.70559	4.41757	4.44726	4.67297	5.10311	5.09023	5.99457	5.90244	5.56761	5.55914	5.4368	5.71018	5.46005	5.33722
1	euxassay_007736_14.jpg	NM_020043	56741	Igdcc4	9330155G14Rik|DDM36|Nope|WI-16786|WI-18508|mKIAA1628	7569				1	5.99594	5.5099	5.53629	5.63267	5.7025	5.8945	5.64004	5.80681	6.1021	6.03418	6.24229	6.0593	6.46912	6.72969	6.49007	6.76451	6.63421	6.48262	6.21126	5.90734	5.44619	5.57523	5.51641	5.67363	5.77036	5.89681	5.84157	6.06837	5.97862	6.16568	6.11801	6.27795	6.19348	6.32193	6.39264	6.55743	6.73471	6.29326	6.39613
1	euxassay_006896_11.jpg	NM_175115	67143	Ikzf5	2610034F18Rik|MGC106439|PEGASUS|Zfpn1a5	7569				2	6.60222	6.33838	6.37443	6.7921	6.59063	6.63899	6.58205	6.29237	6.6081	6.66653	6.51927	7.07712	6.7576	7.22405	7.03827	6.98612	7.02356	6.90993	6.42958	6.57117	6.46483	6.39144	6.36446	6.63277	6.52127	6.30749	6.71529	6.54738	6.54537	6.83164	6.75109	6.98187	6.87166	7.12272	7.08228	7.28945	6.87121	7.15981	7.12502
1	euxassay_006896_14.jpg	NM_175115	67143	Ikzf5	2610034F18Rik|MGC106439|PEGASUS|Zfpn1a5	7569				2	5.7551	6.56519	6.95988	6.63351	6.43969	6.59589	6.59479	6.47958	6.20454	6.77981	6.81924	6.90868	6.73567	6.91214	7.11031	7.20418	6.87575	6.59318	6.82208	6.67515	5.43643	6.37871	6.37357	6.38288	6.27317	6.5601	6.54301	6.30156	6.44399	6.79644	6.87593	6.96459	7.00904	7.08342	6.9504	7.03045	6.92565	6.77015	6.63184
1	euxassay_011040_11.jpg	NM_153526	231070	Insig1	1810013C12Rik|Insig-1	7569				1	4.64006	4.52641	5.25973	5.56685	5.36461	5.53332	5.32036	4.7466	4.86685	4.91333	4.98088	5.14934	5.59032	5.08656	5.43373	5.43151	5.41582	5.41131	5.21317	5.39654	4.6036	4.25306	4.6036	5.37623	5.86077	5.75551	5.43522	5.13572	4.66175	4.79591	4.71032	4.57295	5.06565	5.06374	5.43225	5.46601	5.50182	5.75194	5.72734
1	euxassay_019598_11.jpg	NM_0168892	53626	Insm1	IA-1	7569		mouseTF		1	4.37012	4.49419	4.79569	4.75641	4.88597	5.40199	4.93471	4.82265	5.20001	5.62107	5.80529	6.05073	5.24136	5.42917	5.8583	6.30367	6.29315	5.77975	5.98011	5.41734	4.1375	4.8507	4.69938	4.49825	4.85624	5.14671	5.18938	5.78999	5.11402	5.26637	5.31502	5.43474	5.57305	5.80242	5.47013	6.62251	6.54966	6.01275	5.60524
1	euxassay_002731_11.jpg	NM_027256	101861	Ints4	2610034N24Rik|AA692684|AW493223	7569				1	4.79459	4.94961	5.48512	5.4452	5.43412	5.49226	5.45254	5.48691	5.3851	5.6281	5.92841	5.87887	5.68996	5.77146	6.01771	6.12036	6.13526	6.18568	6.12954	6.31814	5.14196	5.34228	5.45437	5.53264	5.5257	5.61998	5.6538	5.46892	5.40036	5.67749	5.71916	5.8205	5.87751	6.08419	6.3568	6.41149	6.27946	6.159	6.31311
1	euxassay_014216_11.jpg	XM_357863	384783	Irs2	Irs-2	7569				1	3.59727	4.22052	4.47442	4.35976	4.29007	4.36866	4.46253	3.75401	4.58335	4.08519	4.40063	4.89666	4.25991	4.51255	4.19575	4.15584	4.62075	4.50903	4.36477	4.328	3.85716	4.18551	4.49132	4.2599	4.08833	3.94304	3.84233	3.95343	4.20302	4.11016	4.33596	4.4082	4.27378	4.82683	4.44055	4.27792	4.64871	4.83622	4.56202
1	euxassay_009772_14.jpg	XM_895069	16396	Itch	6720481N21Rik|8030492O04Rik|A130065M08|AIP4|C230047C07Rik|KIAA4011	7558				1	4.99945	5.38808	5.162	5.12419	5.26703	5.43082	5.31815	5.51093	5.35125	5.81656	5.65734	5.84426	5.80752	5.72658	5.8382	5.88099	5.92694	5.28152	5.42275	5.4657	5.00766	4.76397	4.66964	4.83415	4.95794	5.04224	5.29179	5.3328	5.12878	5.43762	5.66578	5.90169	5.6419	5.94397	5.87554	6.00306	5.90214	5.98208	5.94136
1	euxassay_012071_11.jpg	NM_008397	16403	Itga6	5033401O05Rik|AI115430|Cd49f		marker			1	5.55993	4.41608	4.72054	4.54168	4.29045	4.96081	5.02047	4.83166	4.55424	5.25892	5.08722	5.62216	5.01717	5.69049	6.34173	5.1771	5.90542	5.23074	4.91727	5.02211	4.28713	4.26705	5.17118	4.76543	4.72053	4.58016	5.02294	4.53708	4.89768	4.68359	5.11909	5.02212	4.88689	4.95651	5.82145	5.61236	5.76361	5.62487	5.07618
1	euxassay_009584_11.jpg	NM_008402	16410	Itgav	1110004F14Rik|2610028E01Rik|CD51|D430040G12Rik	7469				1	4.05057	4.23554	3.98932	3.80664	3.88685	3.94629	3.66723	3.95665	4.09064	4.05829	4.26585	5.00569	4.46043	4.43842	4.9012	5.06627	5.40197	4.69139	4.62928	4.20283	4.40703	4.23554	4.07931	3.7144	3.91899	3.84507	3.95044	3.84284	4.12044	3.95665	4.2474	4.85653	4.61888	4.50347	4.91083	5.072	5.2409	5.06052	4.77574
1	euxassay_011385_11.jpg	XM_484197	320910	Itgb8	4832412O06Rik	7569				1	3.83323	4.10726	4.2032	4.08382	3.72829	4.02923	3.67699	3.75624	4.31158	4.39471	4.70237	4.98749	4.80801	5.14619	4.59901	4.26565	4.81713	5.06998	5.05752	5.16061	4.13945	3.86475	3.85924	3.84815	3.77588	3.46351	3.61074	3.73232	4.00281	4.48075	4.89319	4.83072	4.53407	5.08988	5.54677	4.53822	4.88922	4.81486	4.82054
1	euxassay_011634_11.jpg	NM_054102	117198	Ivns1abp	1190004M08Rik|1700126I16Rik|AA960440|HSPC068|ND1|NS-1|NS1-BP|Nd1-L|Nd1-S|mKIAA0850	7569				1	6.35759	6.44372	6.62138	6.46535	6.54333	6.58233	6.66889	6.46232	6.52662	6.2035	6.64052	7.16034	6.99237	6.76119	7.00864	7.28635	6.89964	6.97251	6.69569	6.72805	6.21782	6.71565	6.666	6.70391	6.61431	6.45442	6.76045	6.63972	6.5211	6.22187	6.72629	6.8177	6.63569	6.76316	6.90054	7.3059	6.97123	6.94024	7.06958
1	euxassay_000180_11.jpg	NM_023277	83964	Jam3	1110002N23Rik|JAM-3|JAM-C|Jcam3	7569				1	5.6707	5.79773	5.8075	5.64209	5.56563	5.7006	5.85203	6.04694	6.42001	6.3336	5.87843	6.3156	6.32563	6.37127	6.42076	6.52522	6.13773	6.53907	6.66802	6.18201	5.74968	5.59909	5.43833	5.72928	5.91926	5.73832	5.9769	6.0484	6.20392	6.07765	6.23106	6.30753	6.20131	6.56351	6.55467	6.71341	6.6819	6.67533	6.4076
1	euxassay_013179_11.jpg	NM_008441	16561	Kif1b	A530096N05Rik|AI448212|AI506502|D4Mil1e|KIF1Bp130|KIF1Bp204|mKIAA0591	7569				1	4.59349	3.75228	4.74125	5.15342	5.14619	4.6548	4.70606	4.85307	4.96509	4.82846	5.3014	5.55156	5.87533	6.1491	5.6853	5.82192	5.63973	5.78518	5.68467	5.75344	5.04397	4.31803	5.19864	5.08706	5.32878	4.85307	5.27183	4.94545	5.34307	5.16776	5.50573	6.21834	6.04564	5.98872	5.5726	5.90023	5.81567	5.64422	6.18347
1	euxassay_002566_11.jpg	NM_053173	16580	Kifc5b	Hset|KNSL2|Kifc5a|MGC76666	7569				1	4.05091	4.12449	4.39119	4.20818	4.03443	4.06468	4.19948	4.32675	4.32575	5.81799	6.28459	5.87304	6.82599	6.75374	6.49958	5.91316	5.38841	6.66333	6.0726	6.47209	3.99601	4.06587	4.03565	4.52079	4.07065	4.18302	4.53296	4.28625	4.58898	5.30217	5.20284	5.47925	6.35237	6.21993	5.59736	5.98452	6.40084	6.81464	6.27815
1	euxassay_005688_11.jpg	NM_023184	66277	Klf15	1810013I09Rik|AV048136|AW494632|CKLF|KKLF	7569				1	3.36885	3.36885	3.34876	3.33521	3.36885	3.36885	3.2631	3.29611	3.27261	3.2891	3.5479	3.37548	3.63527	3.78896	3.92433	3.60014	3.74864	3.64781	3.34538	3.05199	3.36885	3.28675	3.39955	3.36885	3.36885	3.36885	3.26984	3.55992	3.6414	3.1334	3.31885	3.42962	3.622	3.96596	3.8298	3.83167	3.02598	3.56219	3.87055
1	euxassay_010975_11.jpg	NM_026167	67455	Klhl13	1200009K10Rik|AI451128|Bklhd2|D130072F20Rik|mKIAA1309	7557				2	3.89978	4.10415	4.24419	4.23477	4.06744	4.32484	4.29657	4.34569	3.95795	4.1519	4.25099	4.40079	4.71418	4.81514	4.66605	4.88936	4.89071	4.76075	5.01428	5.11369	4.2545	4.1288	4.26658	4.30403	3.97419	4.05571	4.26565	3.97207	4.24466	4.24043	4.44378	4.58739	4.80872	4.67392	4.49888	4.59819	4.66368	4.9135	4.98673
1	euxassay_010975_14.jpg	NM_026167	67455	Klhl13	1200009K10Rik|AI451128|Bklhd2|D130072F20Rik|mKIAA1309	7557				2	4.03366	4.04896	3.93381	4.13489	4.19864	4.14658	4.49825	4.19489	4.18276	4.17242	4.21476	4.35322	4.23902	4.37913	4.90036	4.53476	4.58461	4.33083	4.78784	4.6898	4.17094	4.05999	3.81192	4.12311	4.35341	4.31825	4.4613	4.08539	4.2205	4.15753	4.12727	4.58015	4.51737	4.44807	4.67209	4.57679	4.66789	4.55195	4.4891
1	euxassay_012137_11.jpg	BC057606	71778	Klhl5	1300013C10Rik	7557|7569				1	5.51048	5.16601	4.93624	4.43301	4.42166	4.44392	4.48029	4.68836	4.78843	4.88201	5.47591	5.74511	5.58123	5.68302	5.8335	4.81715	5.87369	6.37899	5.76145	5.12645	5.3636	4.77873	4.40536	4.53086	4.63237	4.7532	4.60299	4.51692	4.21421	4.94754	5.62844	5.18564	5.21255	5.22974	5.42209	5.55476	4.95359	5.64508	5.1394
1	euxassay_011295_11.jpg	NM_001042421	208628	Kntc1	D330012D13	7569				2	4.21476	4.26898	4.37939	4.32444	4.36234	4.36234	4.36234	4.41589	4.41739	4.79652	5.15702	5.71246	5.84664	5.83882	5.58868	5.31233	5.22502	5.20452	5.12522	4.57735	4.40534	4.36234	4.57366	4.33242	4.37167	4.36546	4.384	4.63687	5.088	5.06711	5.35995	5.31837	5.45985	5.52221	5.58116	5.19361	5.19142	5.17599	4.83493
1	euxassay_011295_14.jpg	NM_001042421	208628	Kntc1	D330012D13	7569				2	4.50022	4.40204	4.32415	4.55853	4.73352	4.81977	4.82119	5.29024	5.66432	5.53286	5.51895	5.76429	5.84807	5.82139	5.94233	5.38822	5.47547	5.59139	5.36992	4.92773	4.59613	4.58949	4.645	4.63858	4.80551	4.94994	4.88089	4.78385	5.1928	5.79421	6.11358	6.04846	6.212	6.15184	5.80069	5.72846	5.41195	5.35825	5.37186
1	euxassay_011455_11.jpg	NM_145381	212442	Lactb2	Cgi-83|E430032H21Rik|MGC7674	7569				1	5.40226	5.27805	5.20778	5.00007	5.04835	5.31637	5.16464	5.18417	5.01502	5.16285	5.54917	5.9112	5.72251	5.4068	5.60293	5.52082	5.30283	5.26789	5.63748	5.64631	5.14846	4.93134	4.96252	5.31234	4.99103	5.15027	5.20692	5.36851	5.40907	5.44778	5.26726	6.00753	5.69554	5.80051	5.82277	6.00104	5.62519	5.48834	5.49635
1	euxassay_013657_11.jpg	NM_019980	56722	Litaf	3222402J11Rik|C85531|N4WBP3|TBX1	7569				1	4.36104	4.17981	4.32417	4.5197	4.43701	4.5162	4.4444	4.26009	4.70831	5.06663	5.59067	5.57125	5.84274	5.64742	5.1197	5.51277	5.31918	5.39428	5.44226	5.18461	4.26565	4.29589	4.52551	4.51504	4.27258	4.49148	4.45661	4.41088	4.70524	5.40856	5.81054	5.54299	5.25766	5.4729	5.49582	5.34465	5.27845	5.29406	5.58801
1	euxassay_002078_14.jpg	NM_144799	30937	Lmcd1	AW455500|AW553074|MGC29184|dyxin	7569				2	3.34079	3.51215	3.6986	3.39005	3.46938	3.71701	3.14025	3.20427	3.86076	3.80221	4.5274	5.35423	5.16614	5.70029	5.67164	5.3448	4.77113	4.39652	4.81507	4.55084	3.29525	3.18207	4.13554	4.05586	3.76496	3.76732	3.89994	3.98339	4.33431	4.02534	4.90128	5.0692	4.5481	5.29667	5.25697	5.11895	4.58597	4.31511	4.48651
1	euxassay_011129_11.jpg	NM_172668	228357	Lrp4	6430526J12Rik|D230026E03|Megf7|mdig	7569				2	4.41052	4.76906	4.86334	4.73851	4.89831	4.80719	4.81209	4.59333	4.70202	5.09002	5.3524	5.49226	5.3451	5.32009	5.32696	5.28234	5.56686	5.62324	5.66069	5.73931	4.8283	4.64824	5.03311	4.79734	4.71864	4.8657	4.66819	4.68164	4.87743	4.82588	5.35855	5.41761	5.50761	5.66701	5.37161	5.48571	5.67331	5.7438	5.77097
1	euxassay_011129_14.jpg	NM_172668	228357	Lrp4	6430526J12Rik|D230026E03|Megf7|mdig	7569				2	4.90536	5.03618	4.93396	4.86523	4.79652	4.85196	5.29406	5.49155	5.56263	5.61181	5.3803	5.49404	5.80625	5.74928	5.74853	5.70771	5.79185	6.03186	5.76189	5.60029	4.40231	4.83409	4.85972	4.75081	4.74364	4.78958	4.89462	5.11785	5.39504	5.72705	5.79388	5.57731	5.51417	5.74808	5.88946	5.85664	5.52813	5.19471	5.48064
1	euxassay_001693_11.jpg	NM_025520	66373	Lsm5	2010208O10Rik|2310034K10Rik	7569				1	4.99658	4.64055	4.54193	4.69107	4.75875	4.05071	4.29484	4.51413	4.29892	4.34303	5.1444	4.49412	5.78858	5.66503	5.23302	5.03864	5.42869	5.51652	4.95584	5.17356	4.3669	4.52147	4.97028	4.38236	4.38345	4.30298	4.29756	4.31913	4.30569	4.69932	4.95756	5.14213	4.98903	5.00742	5.12769	5.28328	5.08661	4.95498	5.00493
1	euxassay_000241_14.jpg	NM_024452	269593	Luzp1	2700072H04Rik|AI266952|Luzp|MGC169408|MGC169410|mFLJ00226	7569				1	5.9216	5.42378	5.47585	5.69962	5.69033	5.46356	5.44748	5.457	5.79624	6.11301	5.73496	5.68661	6.06689	6.05536	5.63866	5.72302	6.03742	5.97698	6.25505	6.08365	5.12531	5.51634	5.36509	5.35885	5.5058	5.72105	5.43345	5.41779	5.69467	5.90885	5.97507	5.97405	6.21191	5.90324	6.02085	6.04957	5.89787	6.01156	5.96163
1	euxassay_006253_11.jpg	NM_175188	72925	March1	2900024D24Rik|BB085186	7538|7557				1	4.01773	4.62306	3.79332	4.24889	3.91521	4.19009	3.99277	3.88116	3.95709	3.91698	4.31481	4.86596	4.73965	4.35974	4.13307	3.92086	4.30186	4.31642	4.14942	4.07338	4.0455	3.82005	3.72627	4.09011	4.49385	4.63494	4.17834	3.79717	3.9363	3.94326	4.0325	4.2248	4.0455	4.30403	4.15603	4.58794	4.4554	3.91024	3.99914
1	euxassay_001694_11.jpg	NM_008563	17215	Mcm3	AL033361|C80350|Mcmd|P1|p1.m	7569				2	4.83282	4.50418	4.36525	4.34173	4.47834	4.51123	4.51561	4.58571	4.64618	4.89677	5.81125	5.82262	6.50182	6.16739	6.3194	6.27336	6.72471	7.04008	6.7299	6.38799	4.41118	4.60396	5.52787	5.17764	4.57483	4.64858	4.41024	4.31278	4.69728	4.92936	6.255	6.55094	6.3194	6.87735	6.682	6.23413	6.51414	6.15366	5.53566
1	euxassay_005154_14.jpg	NM_025676	66634	Mcm8	5730432L01Rik	7469				1	3.71585	3.76216	3.76216	3.76216	3.76216	3.76216	3.78227	3.93381	3.94723	3.99109	4.15045	4.29744	4.49926	4.69408	4.90215	4.86491	4.83634	4.75951	4.61872	4.60011	3.752	3.76216	3.76216	3.76216	3.76216	3.76216	3.76216	3.88814	3.96053	3.99541	4.0448	4.41267	4.74876	4.92041	4.93919	4.79734	4.60561	4.53015	4.35714
1	euxassay_000834_14.jpg	NM_026197	67493	Mettl16	2610100D03Rik|2810013M15Rik|A830095F14Rik|AI846133|Mett10d	7569				1	5.21263	4.90992	5.85725	5.88056	5.75261	5.47237	5.93485	5.62254	5.74665	5.69447	5.54512	5.88418	6.03766	5.83823	6.09233	6.2638	6.3254	6.42949	6.30087	6.26484	5.07312	5.24298	5.86001	5.76642	5.60454	5.22554	5.35325	5.40587	5.63818	5.6355	5.76003	5.61439	6.10325	6.1671	5.8905	6.00184	6.12829	6.04334	6.15741
1	euxassay_010873_11.jpg	NM_008594	17304	Mfge8	AA408458|AI325141|MFG-E8|Mfgm|P47|SED1|lactadherin	7569				1	3.91115	4.00257	3.94426	4.04342	3.66079	3.73833	3.72829	3.91166	5.10207	4.62089	4.13337	4.33083	4.62631	4.69393	4.52552	5.31837	4.74065	4.77032	4.92343	4.84101	3.56148	3.89277	3.64623	3.61853	3.75029	3.76216	3.74433	3.76216	3.73633	4.00447	3.61293	4.87964	5.41859	4.90839	5.06184	4.99136	4.85769	4.50448	4.3506
1	euxassay_005155_11.jpg	NM_029662	76574	Mfsd2a	1700018O18Rik|Mfsd2	7469				2	5.04252	4.86596	4.35844	4.32684	4.21476	4.10726	3.86475	3.76216	3.77392	3.945	4.14701	4.36753	4.54052	4.66684	4.63816	4.70627	4.77911	5.00972	5.21254	5.20561	4.08314	4.20734	4.21476	4.32513	4.21476	4.14269	4.05034	3.99541	4.004	4.21044	4.34667	4.51621	4.49622	4.49622	4.61981	4.78493	4.78784	4.79363	4.85307
1	euxassay_005155_14.jpg	NM_029662	76574	Mfsd2a	1700018O18Rik|Mfsd2	7469				2	4.63816	4.22337	4.08382	4.14851	4.31749	4.30268	4.34667	4.00613	4.21476	4.40206	4.89408	4.88868	4.72154	4.72356	4.53246	4.51036	4.86687	4.55423	5.34359	4.05678	4.32017	4.54967	4.45174	4.27534	4.2559	4.43331	3.90811	4.10105	4.1455	4.28907	4.61763	4.36494	4.45661	4.66474	4.84287	4.5127	4.54625	4.74763	4.80131
1	euxassay_013835_14.jpg	NM_010797	17318	Mid1	61B3-R|DXHXS1141|Fxy|MGC60591|Trim18	7569				1	5.30981	5.12694	5.20832	5.21858	5.57991	5.7795	5.84057	5.31183	5.65141	5.37741	5.45346	6.14774	6.56116	6.80823	6.51415	6.47661	6.12926	6.3796	6.37381	5.98265	4.85061	4.9593	5.43273	5.38941	5.68491	5.34622	5.48601	5.70656	5.5622	5.62567	5.29048	6.04315	6.22799	6.68629	7.02636	6.35997	6.66611	6.38608	6.35288
1	euxassay_004198_11.jpg	NM_172578	217653	Mis18bp1	6720403H11|C79407|KIAA1903|Knl2|mKIAA1903	7569				2	3.78227	4.13098	4.01254	3.64623	3.56148	3.90199	3.72973	3.83136	4.11807	4.58572	4.98715	4.95823	6.26598	5.1075	4.79748	4.90125	5.50467	4.94528	5.09427	4.87691	3.67161	3.66801	4.14399	3.65807	3.70184	3.83698	3.77588	4.0901	4.05034	4.13641	5.61071	5.5527	4.97191	4.93919	6.07867	4.89408	4.64245	4.71138	6.12419
1	euxassay_004198_14.jpg	NM_172578	217653	Mis18bp1	6720403H11|C79407|KIAA1903|Knl2|mKIAA1903	7569				2	3.66621	3.79222	3.90963	3.86946	4.00257	4.05449	4.1006	3.57115	3.82167	3.96053	4.45505	5.49531	6.54766	6.26425	5.52512	4.96679	6.19628	4.4974	5.7222	6.07074	3.79222	3.84417	3.73432	3.93456	3.85	3.57532	3.57756	4.05034	3.79717	4.08696	4.34273	5.09114	5.36385	6.25728	5.18299	4.39699	4.54281	4.86229	4.43207
1	euxassay_010374_14.jpg	NM_133241	170790	Mlc1	AW048630|BB074274|Kiaa0027-hp|LVM|MLC|VL|WKL1|mKIAA0027	7569				1	3.4803	3.7836	3.564	3.43901	3.43901	3.33165	3.42913	3.54581	3.68318	3.89374	3.97074	4.17681	3.7621	3.43655	4.04383	4.09006	3.75222	4.07745	4.01438	3.93869	3.61504	3.58419	3.80287	3.82942	3.77971	3.81431	3.84438	3.66855	3.48508	3.59307	3.66434	3.93974	4.41084	3.658	3.90627	3.66012	3.42167	4.01438	4.21731
1	euxassay_001892_14.jpg	NM_024177	60441	Mrpl38	1110036N21Rik|4733401F03Rik|MGC41062|MGC8310|MRP-L3|R75240|Rpml3	7569				1	5.11164	5.22252	5.2408	5.37763	5.097	4.9045	5.75702	5.38423	5.4339	5.76638	5.71491	5.99469	6.25295	5.82975	5.49678	6.28996	6.1756	6.02701	5.88866	6.47072	4.72853	4.75081	5.05215	5.30593	5.05422	4.72015	4.55153	4.94842	5.50681	5.34861	5.36166	5.74711	5.91014	6.46135	6.20523	5.94135	5.83022	5.96464	5.84238
1	euxassay_019261_11.jpg		218506	Mrps27	2610028H14Rik	7569				1	6.70515	6.26364	6.76512	6.68993	6.43858	6.47404	6.6779	6.5074	6.26781	6.24262	6.05008	6.59078	6.45642	7.1577	7.16601	7.01962	6.75583	6.9914	6.6288	6.67319	5.51679	5.88591	6.70712	6.68036	6.33601	5.97707	6.581	6.12811	6.03863	6.10301	6.3638	6.34336	6.54074	6.73877	6.92272	7.07553	6.57477	6.93488	6.95741
1	euxassay_001482_11.jpg	NM_021556	59054	Mrps30	2610020A16Rik|AA968347|PAP|Pdcd9	7569				2	5.40368	5.59284	6.33164	6.13782	6.19758	5.97611	5.45933	5.58582	6.39988	6.85853	6.66946	6.66156	6.74762	6.70589	6.22845	6.49916	6.5359	6.24515	6.2131	6.25148	6.44683	6.11747	6.20835	6.08153	6.33884	6.20047	6.31109	6.02933	5.71307	6.33129	6.37305	6.52052	6.44342	6.38461	6.48031	6.4573	6.6849	6.80076	6.69907
1	euxassay_001746_11.jpg	NM_013602	17748	Mt1	MT-I|Mt-1	7569				1	3.13123	3.06162	3.00284	3.06436	3.02552	3.22238	3.37143	3.38026	3.63373	3.36478	3.27063	3.58304	4.12862	4.0807	3.99856	4.04508	4.96303	4.77844	3.96962	3.7826	3.1181	3.30579	3.29883	3.28715	3.38246	3.23946	3.23459	3.22972	3.23702	3.42785	3.54038	3.47803	3.55018	3.78924	3.74552	4.01707	4.22238	4.04091	4.50955
1	euxassay_012667_14.jpg	NM_013603	17751	Mt3	Mt-3	7569				1	4.51825	4.99618	4.1519	4.26461	4.38841	4.47205	4.43547	5.85206	4.86756	5.8304	5.31183	5.90031	5.84481	5.71916	5.4431	6.49358	6.49307	5.24479	5.13307	5.10473	3.93979	4.04671	4.19848	4.13147	4.26565	4.33083	4.28428	4.27706	4.54166	4.96765	5.4562	5.62202	6.04133	6.00591	5.4373	5.37189	6.02335	5.92313	5.05256
1	euxassay_003372_11.jpg	NM_024433	66902	Mtap	1300019I21Rik|MSAP	7569				1	5.55563	5.70855	5.56243	5.76319	5.73738	5.3607	5.51589	5.39856	5.53906	5.75728	5.92276	6.35424	6.76839	6.67186	6.76692	6.84173	6.5394	6.28671	6.33993	6.15434	5.46236	6.01942	5.91791	5.73988	5.78419	5.39157	5.71416	5.6507	5.40298	5.85744	6.23054	6.59739	6.8023	6.64194	6.71928	6.62553	6.4905	6.29613	6.19692
1	euxassay_004845_11.jpg	NM_138745	108156	Mthfd1	Dcs|E430024A07Rik|Mthfd	7569				1	5.45802	5.55199	5.48467	5.62324	5.63256	5.24176	5.23448	5.83482	5.01622	5.59627	6.30169	6.48312	5.84879	6.77715	6.58205	6.60364	6.60034	6.71573	5.87712	6.47517	4.88326	5.70233	5.50908	5.56263	5.47884	5.61876	5.61672	5.05643	5.14865	5.45776	5.66106	5.84002	6.44157	7.11544	6.23546	6.08335	6.51076	6.10447	6.1558
1	euxassay_011458_11.jpg	NM_010848	17863	Myb	AI550390|M16449|MGC18531|c-myb	7569		mouseTF		1	4.38144	5.01145	5.16039	4.85329	5.17568	5.16561	5.16263	4.9749	5.0035	5.14159	5.29032	5.59782	5.63	5.6099	5.57726	5.48304	5.76534	5.77708	5.47285	5.54672	4.53947	4.90617	4.82043	4.90847	4.84614	5.27177	4.87738	4.79412	4.97065	4.80945	5.07102	5.23394	5.16338	5.53178	5.80458	5.65461	5.45225	5.617	5.54558
1	euxassay_019545_11.jpg	NM_016776	18432	Mybbp1a	AL024407|AU019902|P160|p160MBP|p67MBP	7569				1	5.81671	6.31109	6.15856	6.30279	6.42722	5.91625	6.03052	6.0187	6.19796	6.58715	6.26035	6.23716	6.79977	6.93639	7.09418	7.10563	6.98301	7.151	6.92615	6.97539	5.86381	5.87369	6.106	6.7296	6.25867	6.34008	6.35895	6.24521	6.18259	6.19051	6.71106	6.74732	6.81892	6.80293	7.04526	6.61555	7.08193	7.12643	6.77642
1	euxassay_002836_14.jpg	NM_008652	17865	Mybl2	B-Myb|Bmyb	7569		mouseTF		1	4.7655	4.95227	4.65319	4.75465	4.62748	4.75959	4.76255	4.87516	4.93368	5.05726	5.30929	6.10215	6.92212	6.29903	6.42638	6.06336	5.95073	5.80924	5.21921	5.31171	5.19549	5.03364	4.77724	4.68988	4.59689	4.47124	4.53831	4.70635	4.7586	4.85868	5.50648	5.95797	6.23478	6.53621	6.41371	6.05116	5.52284	5.68575	5.54864
1	euxassay_018746_11.jpg	NM_008709	18109	Mycn	N-myc|Nmyc|Nmyc-1|Nmyc1|bHLHe37|c-nmyc	7538|7540|7569		mouseTF		1	5.1476	5.45222	5.36674	5.78483	5.42698	5.69176	5.20522	4.90809	4.92824	5.05709	5.30104	5.21389	5.38245	5.71096	5.27063	5.40002	5.35295	5.37938	5.70605	5.46461	4.50738	4.56608	4.9212	5.51725	5.74702	5.71483	5.67721	5.11867	4.92999	4.68717	5.3648	5.80169	5.76138	5.51899	5.2556	5.42188	5.57499	5.60033	5.88759
1	euxassay_009373_11.jpg	NM_019472	17909	Myo10	AW048724|D15Ertd600e|mKIAA0799	7557|7569				1	4.0439	3.69569	3.79911	3.83512	3.93457	4.02433	3.78173	3.91345	3.97761	4.16798	4.59018	4.94181	4.86505	5.01304	5.0295	6.01689	5.87524	6.01813	5.69142	5.89854	4.21621	3.88661	3.89202	3.93632	3.94154	3.94675	3.95021	3.84631	3.99111	4.10572	4.39828	4.36754	4.79556	4.6815	5.05222	5.76312	6.17463	5.34492	5.27211
1	euxassay_000882_14.jpg	NM_026086	67311	Nanp	1600031M04Rik|Hdhd4|MGC103377	7569				1	4.97536	4.6353	4.84597	4.47515	4.48831	4.59497	4.81783	4.67872	4.32062	4.44971	5.07326	5.16101	5.08748	5.31793	5.38851	5.35822	5.02156	5.13691	4.87994	5.0961	4.64388	4.49662	4.31928	4.24373	4.27304	4.55006	4.50958	4.52591	4.39361	4.61146	4.83759	5.03466	5.38595	5.405	5.76966	5.06131	4.91348	4.76221	4.73839
1	euxassay_002772_14.jpg	NM_026086	67311	Nanp	1600031M04Rik|Hdhd4|MGC103377	7569				1	4.32729	4.54205	4.22385	4.59607	4.64281	4.37956	4.49543	4.57829	4.35497	4.686	4.85523	4.84411	4.90869	5.20513	5.33722	5.23806	5.33524	5.21091	5.04748	5.20788	4.6714	4.44726	4.65982	4.28269	4.57044	4.42255	4.32596	4.30988	4.64388	4.50958	4.62126	4.73398	5.353	5.67191	5.39855	5.79539	5.03776	5.5216	5.31806
1	euxassay_016401_11.jpg	NM_016777	50927	Nasp	5033430J04Rik|AI131596|AI317140|D4Ertd767e|Epcs32	7569				1	3.78414	3.85509	3.87707	4.22658	4.02964	3.88388	4.28839	4.42897	4.36429	4.14626	4.68487	5.3619	5.13666	5.10207	5.06766	5.33605	5.05256	5.36857	5.21797	5.13958	3.87844	3.72172	3.80293	3.75772	3.76805	3.83978	4.05034	4.12804	3.97334	4.34554	4.5451	4.87899	5.38236	5.63365	5.27408	5.02046	5.7641	5.12718	5.1812
1	euxassay_000822_11.jpg	NM_008675	17965	Nbl1	D4H1S1733E|DAN|Dana|MGC123430|NO3	7569				1	6.02882	5.66914	5.73332	5.86475	5.83276	5.83838	5.66018	6.08932	6.07671	5.86246	6.34108	5.9476	6.28942	6.32824	6.11907	6.22658	5.96798	6.20676	6.18621	6.05397	5.68999	6.02308	5.95838	5.83464	5.88343	5.85278	6.01649	5.90811	5.85601	5.96652	5.88578	6.01484	6.15325	6.17294	6.36526	6.0779	6.01434	5.80837	5.93953
1	euxassay_008577_11.jpg	NM_176957	210356	Nckap5	8430408F21|D130011D22Rik|E030049G20Rik|Erih1|Erih2|Gm1548|MGC90557|Nap5	7569				1	3.60094	3.61147	4.03956	3.61671	3.77731	3.79589	3.71763	3.93024	4.04539	4.13114	4.62905	4.73668	4.63067	4.43335	4.00951	4.92126	4.53538	4.38238	4.08937	4.18501	3.219	3.85025	4.01001	4.15383	4.11366	3.61147	3.99199	4.05314	3.82785	4.50393	3.63747	4.1155	4.73578	5.28706	5.05313	4.46962	4.42405	4.2433	4.48616
1	euxassay_009400_11.jpg	NM_011424	20602	Ncor2	N-CoR|SMRT|SMRTe	7569		mouseTF		1	4.00656	4.45449	4.42495	4.49059	4.40112	4.55111	4.6004	4.53045	4.73088	4.79868	4.69234	4.93174	5.05933	5.16497	5.59789	5.37113	5.49502	5.53083	5.30293	5.21157	4.00157	4.09833	4.16835	4.3457	4.57932	4.63307	4.34832	4.27983	4.49178	4.74828	4.88585	4.80214	5.06508	5.37345	5.40103	5.31667	5.42436	5.09165	5.69392
1	euxassay_010375_11.jpg	NM_023317	67203	Nde1	2810027M15Rik|AU042936|AW822251|Nude|mNudE	7569				1	3.90658	3.8616	3.6073	3.55565	3.75709	3.49466	4.07433	3.83698	3.68116	4.90393	5.44765	5.01634	5.42607	5.32105	6.04508	4.89678	5.45315	5.3851	5.17043	5.46892	3.35094	4.22826	3.85555	4.20175	4.00281	3.78946	4.03576	3.91875	3.93106	4.43331	4.44317	4.85953	4.98968	5.34096	5.5123	4.8194	4.90928	4.01938	4.63601
1	euxassay_012668_14.jpg	NM_028177	70316	Ndufab1	2210401F17Rik|2310039H15Rik|2610003B19Rik|8kDa|9130423F15Rik|ACP|CI-SDAP|SDAP	7569				1	4.45296	4.40836	4.08853	4.3493	4.37527	4.52783	4.49977	4.40206	4.40079	4.61109	4.82224	5.01717	4.84937	4.93745	4.72255	4.9922	4.82035	4.67523	4.62653	4.56961	4.30538	4.42089	4.43083	4.45783	4.32417	4.41339	4.48194	4.61654	4.60451	4.91105	4.94614	4.94128	4.73042	4.79536	4.78958	4.7756	4.75319	4.86302	4.68752
1	euxassay_006000_11.jpg	NM_016701	18008	Nes	AA166324|C78523|ESTM46	7569	marker			1	6.37442	6.35748	5.75606	5.66195	6.60104	6.31468	5.99597	6.16155	6.20131	6.14579	6.88279	6.84245	6.75738	6.41605	6.67394	6.64086	6.64327	6.66686	6.99849	6.71216	5.59939	6.48039	6.59882	5.96624	6.01061	6.72441	6.23666	6.12462	5.99633	6.04396	6.89342	6.88143	7.12384	6.86188	6.71026	6.82438	6.89631	7.01065	6.61021
1	euxassay_006581_14.jpg	NM_010896	18014	Neurog1	AKA|Math4C|Neurod3|bHLHa6|ngn1	7540	marker	mouseTF		1	5.49236	6.23222	6.31659	6.4227	6.41003	6.12261	5.77944	5.82186	5.8713	6.21937	6.38196	6.62098	6.76095	6.90132	6.70366	6.83968	6.67649	6.44679	6.43619	6.23913	6.28693	5.99735	6.3857	6.63959	6.32461	6.39868	5.83596	5.78672	6.18783	6.56325	6.47139	6.33805	6.21019	6.19714	6.27993	6.94784	7.09433	6.3699	6.21344
1	euxassay_000371_11.jpg	NM_009718	11924	Neurog2	Atoh4|Math4A|bHLHa8|ngn-2|ngn2	7540	marker	mouseTF		1	5.56517	6.12151	5.7448	5.50349	5.66333	5.76558	6.18274	6.19007	6.42181	6.24711	6.18788	6.64297	6.63869	6.72557	6.90927	7.1947	7.35962	6.92193	6.61195	6.96311	5.49124	5.65698	5.37023	5.79907	5.75183	5.70957	5.88883	5.79763	5.88567	6.79265	6.27464	6.57286	6.6499	6.38616	6.50093	6.68668	6.7001	6.77739	6.60669
1	euxassay_009805_14.jpg	NM_009718	11924	Neurog2	Atoh4|Math4A|bHLHa8|ngn-2|ngn2	7569	marker	mouseTF		1	6.13101	5.66693	5.68262	5.97251	5.78028	6.4487	6.35119	5.67323	5.93436	6.69175	6.22213	6.12614	6.03068	6.10288	7.03692	6.79793	7.04266	6.99911	7.07495	6.81552	4.8935	5.62166	5.78792	5.8455	5.71388	5.60241	5.88537	5.90356	6.22562	6.4042	6.03649	6.56691	6.80468	6.53874	6.19038	6.6604	7.05423	6.78373	6.53917
1	euxassay_019468_14.jpg	NM_009719	11925	Neurog3	Atoh5|MGC129292|MGC129293|Math4B|bHLHa7|ngn3	7569		mouseTF		1	4.53799	4.3975	4.2637	4.40509	4.50448	4.93588	4.57477	4.74225	5.08878	5.32545	5.38036	5.3951	5.95673	6.32639	6.49182	6.3536	6.2797	6.45666	6.86175	6.97311	4.65077	4.31615	4.40205	4.58683	4.97004	4.77657	4.82714	5.08972	4.89552	5.09349	5.7354	5.75927	5.84683	6.05764	6.42623	6.43644	5.67864	6.40132	6.546
1	euxassay_009199_11.jpg	NM_013610	18081	Ninj1	AU024536	7569				1	3.44932	3.62417	3.99473	4.17711	4.30831	4.02294	4.1918	3.96253	3.54855	3.79365	3.53939	3.68775	3.95221	4.13515	4.46652	4.72878	4.17415	4.20779	5.00154	4.37059	3.92784	3.82818	4.08453	4.26925	3.98126	3.87784	3.78398	3.80325	3.54627	3.63711	3.58463	3.73466	3.97788	4.86703	4.54758	4.22504	4.41485	4.47375	4.38447
1	euxassay_004749_11.jpg	NM_025391	66164	Nip7	1110017C15Rik|6330509M23Rik|AA408773|AA410017|PEachy	7469				2	4.1481	4.2244	4.48639	4.73336	4.97508	5.34473	5.02106	4.31578	4.59318	5.09092	5.11456	5.08652	5.49825	5.65153	6.23351	6.09593	5.22839	5.80277	5.65026	5.19815	4.62168	3.96861	4.10683	4.572	4.61188	5.1127	4.57536	4.75331	4.63033	4.85651	4.57536	5.23479	5.48197	5.17245	5.54501	5.40448	5.48758	5.52287	5.43593
1	euxassay_004749_14.jpg	NM_025391	66164	Nip7	1110017C15Rik|6330509M23Rik|AA408773|AA410017|PEachy	7469				2	4.23591	4.34961	4.27705	4.42119	4.32716	4.73588	4.63627	4.6576	5.09992	5.2007	5.87124	6.01863	6.1304	6.51451	5.89658	5.57486	5.86438	5.92059	5.44044	5.47027	4.17637	4.1751	3.97557	4.97187	4.92891	4.54439	4.72496	5.33394	5.6747	5.67425	5.50422	5.87625	5.64808	5.68022	6.28538	6.4721	5.59877	5.88034	5.64755
1	euxassay_003414_14.jpg	NM_138314	171567	Nme7	D530024H21Rik|Nm23-M7|Nm23-r7	7569				1	5.26322	5.75561	6.03084	5.78498	5.78382	5.87841	5.7153	6.14894	6.41887	6.50037	6.71851	6.54568	6.45083	6.99818	6.73853	6.56571	6.46224	6.23052	6.02802	6.12652	5.61551	5.63047	5.92136	5.92189	5.69068	5.63886	6.09086	5.77682	5.90219	5.86747	6.29165	6.31116	6.58337	6.55841	6.68127	6.44044	6.33697	6.52755	6.37077
1	euxassay_006783_11.jpg	NM_026393	67824	Nmral1	1110025F24Rik|AI256624	7569				1	5.8927	5.88404	6.00877	5.91412	5.8835	5.77761	6.15361	5.93156	6.03688	6.32815	6.64756	6.24658	6.91603	7.06053	7.00171	7.0716	6.7643	6.51327	6.28512	6.47323	5.88675	6.03834	6.16661	5.98821	5.90077	5.66016	5.65444	6.10134	6.1764	6.43502	6.90276	6.80823	6.56963	6.80322	6.8609	6.69482	6.68239	6.64324	6.78915
1	euxassay_008990_11.jpg	NM_008714	18128	Notch1	9930111A19Rik|Mis6|Tan1|lin-12	7569		mouseTF		1	4.86036	4.16612	4.24915	4.27658	4.45109	4.50049	4.25276	4.28366	4.66207	5.12536	5.33448	5.52755	5.9183	6.00786	6.19859	6.12141	6.27287	6.12989	5.92617	5.79518	4.28952	4.53449	4.39669	4.25396	4.27895	4.38249	4.55704	4.26829	4.88692	4.98346	5.47033	6.2422	6.39885	5.87519	5.84297	6.14582	6.25864	6.43543	6.10487
1	euxassay_009776_11.jpg	NM_010928	18129	Notch2	AI853703|N2	7569		mouseTF		1	5.05875	5.14218	5.21304	5.2616	5.14153	5.13633	5.17614	5.21304	5.18246	5.2964	6.1038	5.89339	6.58237	6.78419	6.59707	6.41556	6.19883	6.78903	6.69984	6.55365	4.76064	5.2478	5.29523	5.16278	5.16789	5.07107	5.31377	5.23631	5.04564	5.51096	6.00849	5.5642	5.9859	6.3689	6.62931	6.82058	6.15713	6.67391	6.94245
1	euxassay_001964_11.jpg	NM_023409	67963	Npc2	2700012J19Rik|AA408070|AU045843|HE1	7569				1	4.91283	5.22931	5.40226	5.37933	5.24418	5.27349	5.4562	5.5361	5.62161	5.90586	6.2021	6.35875	6.55051	6.63922	6.63197	6.5793	6.70677	6.72051	6.73111	6.51239	4.35714	4.95994	5.32439	5.45437	5.54814	5.49048	5.6378	5.7448	5.76558	5.8318	6.15676	6.35973	6.49561	6.61816	6.66235	6.80106	6.76688	6.49739	6.27014
1	euxassay_005287_11.jpg	NM_152229	21907	Nr2e1	Mtl1|Mtll|TLL|Tlx|XTLL|fierce|frc|tailless	7569	marker	mouseTF		1	5.03928	4.93718	4.84351	5.07354	4.74	4.79429	4.83768	5.26148	5.53994	6.81054	6.51588	6.36214	6.42156	6.32088	6.30576	6.39799	6.66944	6.64902	6.66708	6.55944	4.51291	5.00925	4.60718	4.53814	4.79933	4.72476	5.00987	5.64258	5.41119	6.27892	5.93854	5.86171	6.214	6.40463	6.3346	6.52505	6.52526	6.55434	6.23171
1	euxassay_007249_11.jpg	NM_152229	21907	Nr2e1	Mtl1|Mtll|TLL|Tlx|XTLL|fierce|frc|tailless	7569	marker	mouseTF		1	3.46933	4.08603	3.43762	3.56949	3.86182	3.98673	3.99345	4.10012	3.9901	4.48601	5.11924	5.60689	6.50817	6.33472	6.66678	6.00404	6.22928	6.31674	6.23312	5.99351	3.45722	3.96465	3.59403	3.63116	3.73914	3.95951	4.05261	4.12023	4.11715	4.33137	5.45035	5.80644	6.18619	6.34541	6.95422	7.01149	6.32875	6.37815	6.87722
1	euxassay_008969_11.jpg	NM_025980	67122	Nrarp	2700054M22Rik	7569				1	3.95757	4.80278	4.56022	4.61603	4.80134	4.50304	4.56953	4.30542	4.44902	4.34539	4.6103	4.71863	5.12718	5.49784	5.79948	6.21649	5.59152	5.75607	6.16124	5.68529	4.41185	4.39766	4.53191	4.78035	4.61112	4.34144	4.28089	4.5938	4.4924	4.35815	4.71395	4.54227	4.75608	5.78776	5.99423	5.92313	5.38619	5.72869	5.66332
1	euxassay_007625_11.jpg	XM_893383	211323	Nrg1	6030402G23Rik|ARIA|D230005F13Rik|GGF|GGFII|HRG|HRGalpha|Hgl|NDF|SMDF	7569				1	4.00686	3.91117	4.12313	3.89689	4.18087	4.5505	4.40549	4.20859	4.44773	4.62709	4.71109	5.01941	5.25242	5.83589	4.90101	4.80105	4.91524	4.74237	4.74835	4.82952	4.37363	4.01892	4.43914	3.96005	3.49873	3.97032	4.12532	4.49471	4.0881	3.99901	4.34631	4.48877	4.92055	4.82387	4.88572	4.8721	5.25312	4.8182	4.58229
1	euxassay_005082_14.jpg	NM_025539	66401	Nudt2	2310051L06Rik|AA939917|APAH1	7569				1	4.79531	4.97679	5.4021	5.14781	5.23764	5.18206	5.05281	5.03255	4.90013	5.19744	5.22484	5.43273	5.55483	5.65738	5.6577	5.75173	5.68163	5.42454	5.44529	5.46502	5.12283	5.29019	5.46678	5.22739	5.25224	5.51965	5.38585	5.24017	5.09719	5.4021	5.604	5.38877	5.64355	5.81612	5.94877	5.83496	5.64568	5.53538	5.7241
1	euxassay_010729_11.jpg	NM_133947	101706	Numa1	6720401E04Rik|AA764025|AL022610|AU014979	7569				1	3.40838	4.92637	4.83197	4.66228	4.44399	5.18715	4.83384	5.66262	5.17537	5.10673	4.66017	4.40248	5.07538	4.90334	4.68045	4.90274	4.9823	5.91519	6.36606	5.86106	3.92579	4.99723	4.88898	5.15702	4.67419	4.58424	5.17783	4.8438	5.77618	4.74098	5.19592	4.61944	5.10311	5.01165	5.04062	4.84875	6.15929	6.74351	6.44775
1	euxassay_012553_14.jpg	NM_010949	18222	Numb	m-Nb|m-numb|mnb		marker	mouseTF		1	4.44734	4.48004	4.36935	4.56827	4.82451	4.72801	4.55355	4.77755	4.60276	5.18989	5.31663	5.26615	5.33396	5.21729	5.28135	5.24122	5.25472	5.25724	5.05896	4.72619	3.86733	4.90964	4.71586	4.65672	4.8122	4.76974	4.68607	4.72902	4.36547	4.68192	4.89535	5.19792	5.1217	5.28272	5.19135	5.10859	4.99086	5.14303	4.9799
1	euxassay_000009_11.jpg	NM_026532	68051	Nutf2	2700067I02Rik|AI115459|AI413596|AW546000|MGC102015|Ntf2|Ntf3|PP15	7536|7537|7540				1	6.34077	6.70147	6.46392	6.86881	7.09577	6.7948	6.56794	6.61154	6.49019	6.73406	6.71496	6.88721	7.03906	7.00515	6.91603	6.91835	7.12483	7.16671	7.16587	7.00577	6.37864	6.86908	7.07214	6.83214	6.81772	6.66402	6.83467	6.85558	6.58173	6.6122	6.81942	7.17311	7.18197	7.21967	7.11532	6.96593	6.95046	6.62346	6.91005
1	euxassay_004727_11.jpg	NM_011023	18423	Otx1	A730044F23Rik|jv	7469	marker	mouseTF		1	6.53709	6.33185	6.39194	5.87073	5.9721	5.93851	6.27984	6.74142	6.3335	6.87055	6.94529	6.82155	6.86803	6.76027	6.6518	6.6486	6.70126	6.77279	6.53904	6.90332	6.17578	6.06401	6.20938	5.96826	5.62221	5.54821	5.61841	6.06999	6.40681	7.37533	6.75928	6.78058	6.8923	6.62146	6.78568	6.62957	6.76347	6.89742	6.03693
1	euxassay_011207_11.jpg	NM_026226	67543	Pabpc6	4932702K14Rik|AI428050|MGC132900|Pabpc3	7569				2	4.96635	5.17063	5.05485	5.16618	5.06828	5.05557	5.30605	5.34107	5.5471	5.43485	5.27947	5.0028	5.62468	6.08111	6.07041	5.85053	5.96658	6.13399	5.9017	6.0512	4.98671	4.93839	4.73912	4.82646	4.98469	5.4622	5.35191	5.58014	5.83165	6.10331	6.233	5.56532	5.53505	5.4974	5.82389	6.00889	6.12655	6.13627	6.02251
1	euxassay_001611_11.jpg	NM_023792	75735	Pank1	4632412I06Rik|5430426F23Rik|Pank|Pank1a|Pank1b|panK1beta	7569				1	4.40364	5.32867	5.20064	5.21981	5.68352	5.2964	5.18372	5.13111	5.08395	5.23934	5.06698	5.78668	5.85355	5.97138	6.31354	6.27266	5.42029	5.58963	5.1538	5.37244	4.85238	5.30374	5.26674	5.39941	5.31082	5.52917	5.65107	5.05325	5.33151	5.34002	5.31089	6.03248	5.93927	6.00884	6.11937	5.76326	6.00314	5.39547	5.79866
1	euxassay_001070_11.jpg	NM_198600	210106	Papd7	LAK-1|MGC69673|POLK|Pols|TRF4|TRF4-1	7569				1	5.61821	6.06306	5.80603	5.85891	5.60531	5.38596	5.44603	5.29416	5.37596	5.67223	6.1478	5.98625	6.28651	6.15546	6.29265	6.22269	5.82877	5.72592	5.82085	5.83665	5.74218	5.80851	5.64034	5.6634	5.75054	5.56796	5.57335	5.84336	5.73678	5.85227	5.9592	6.22997	5.8906	5.98372	5.99734	5.76299	5.81232	5.99482	6.03058
1	euxassay_009412_14.jpg	XM_901310	72823	Pard3b	1810008K04Rik|2010002N16Rik|2810455B10Rik|Als2cr19|PAR3B|PAR3L|PAR3beta|RP23-20G7.1	7569				1	4.03871	3.52703	3.7076	3.53166	3.78329	3.98404	3.82347	3.84036	4.3608	4.03708	4.05808	3.96877	4.05423	5.01552	4.70115	4.07149	4.40081	4.16561	4.12392	4.17451	4.09607	4.11778	3.95505	3.54545	3.72185	3.82724	3.84966	3.84594	4.04033	4.05165	4.18835	4.38862	4.29373	4.28224	4.15485	4.00715	4.06767	4.10541	3.99313
1	euxassay_014184_14.jpg	AF377871	114774	Pawr	2310001G03Rik|PAR4|Par-4	7569				1	4.03358	4.12981	4.09114	4.09114	3.93571	4.03358	4.25682	4.02868	4.28313	4.52629	5.13564	5.3877	5.06939	4.96856	5.07701	4.95518	4.9899	4.88096	4.74411	4.54974	4.12676	4.26796	4.11601	4.09114	4.09114	4.09114	4.09114	4.12369	4.68738	5.06748	4.92806	4.6438	5.21547	5.27877	5.09119	5.1329	5.0297	5.23518	5.25126
1	euxassay_002571_11.jpg	NM_016768	18516	Pbx3	-	7557		mouseTF		1	4.26843	4.24447	4.22623	4.36494	4.1739	4.2539	4.11587	4.07048	4.16436	3.94253	4.19239	4.54461	4.85453	4.68625	4.73522	4.32627	4.29395	4.26367	4.29531	4.41786	4.19281	4.10371	4.02713	4.209	4.14313	4.18402	3.9253	4.19406	4.12509	4.96301	4.37344	4.87834	4.33953	4.38755	4.59412	4.26367	4.237	4.12662	4.5662
1	euxassay_018934_11.jpg	NM_144844	110821	Pcca	C79630	7569				1	6.0553	6.09101	6.38717	6.19094	6.06539	6.10645	6.37138	6.31813	5.95912	5.94358	6.42385	6.9314	7.23384	7.40458	7.26523	7.24635	6.81008	6.66345	6.73352	6.23587	5.67098	6.22784	6.16258	6.06219	6.31699	6.43316	5.81556	6.21444	6.3361	6.293	6.90677	6.83725	6.98983	7.21087	7.10888	6.91104	6.98275	6.58581	6.34835
1	euxassay_010730_11.jpg	NM_011050	18569	Pdcd4	D19Ucla1|Ma3|Tis	7569				1	4.14942	4.19564	4.86632	4.97225	5.52883	5.41471	4.67628	5.43338	5.23676	5.82404	5.97183	6.10005	5.88431	6.06696	5.81268	6.20319	6.32716	5.79763	5.40793	6.16348	4.5033	5.00057	4.73283	5.11508	5.5316	5.59731	5.21254	5.32318	5.6273	5.33236	5.7846	5.57445	5.76115	5.87751	5.73128	5.95061	6.20645	6.0084	5.69384
1	euxassay_000698_11.jpg	NM_016688	50996	Pdcd7	C80112|ES18	7569				1	5.83988	5.66873	5.87563	5.83409	6.32278	6.12934	5.97021	6.45912	6.58868	6.89835	6.5672	6.70633	6.57563	6.61049	6.93942	7.32195	7.34403	7.34521	7.21747	6.79474	5.45576	6.09841	5.77452	5.92853	6.34773	6.01411	6.18019	6.27432	5.87673	6.63005	6.46203	6.73038	6.6203	6.47974	6.76115	6.79676	6.78198	6.60326	6.54093
1	euxassay_000803_14.jpg	NM_009787	12304	Pdia4	AI987846|Cai|ERp-72|Erp72	7536|7569				1	6.5017	6.65681	6.20288	6.09647	5.72221	6.14904	6.08841	6.24516	6.18348	6.40853	6.71704	6.66642	6.44605	6.48773	6.38822	6.35335	6.61447	6.20842	6.87518	6.73549	6.92015	5.91367	6.12496	5.91405	6.3422	6.2703	6.02078	6.13505	6.14452	6.28716	6.12475	6.44513	6.79445	6.33361	6.38726	6.49189	6.37347	6.28887	6.11937
1	euxassay_001737_11.jpg	NM_172665	228026	Pdk1	B830012B01|D530020C15Rik	7569				1	4.56167	5.01975	4.7273	4.41051	4.79156	4.51035	4.7699	4.65127	4.92368	4.66819	5.37887	5.21591	5.51597	5.1139	5.4817	5.67554	6.19966	5.82818	5.51363	5.96748	4.45921	4.37453	4.78077	5.33037	4.81534	4.63907	4.72557	4.98317	4.13531	4.36918	4.26465	4.07636	4.43365	4.79582	5.4823	5.29561	6.75587	6.44355	5.4588
1	euxassay_001915_11.jpg	NM_019417	30794	Pdlim4	Ril	7569				1	4.22352	4.40093	4.62101	4.46645	4.47368	4.71759	4.51283	4.8541	4.89687	5.98649	6.29107	5.50943	6.17917	5.76248	6.13423	5.83672	5.35272	5.70955	5.44171	5.32579	4.37541	4.74475	4.72872	4.46886	4.15619	4.3323	4.77239	4.75171	5.23294	5.3998	6.37149	6.59024	6.27295	6.00541	5.78533	5.73144	5.35976	5.03643	5.18571
1	euxassay_002001_11.jpg	NM_010329	14726	Pdpn	Gp38|OTS-8|RANDAM-2|T1-alpha|T1a|T1alpha	7569				1	3.98436	3.87935	4.00614	3.96053	4.13945	3.91521	3.8884	4.12727	4.11499	4.36546	4.72316	6.20753	5.73249	6.05628	6.02462	6.63793	6.37023	6.5428	6.61686	6.27243	3.97589	3.86658	3.96053	3.96396	3.97928	4.03576	4.21476	4.20262	4.48481	4.94545	4.63687	5.82532	7.04234	7.09113	6.79285	6.93272	6.5262	6.3117	6.16973
1	euxassay_012483_14.jpg	XM_914682	71521	Pds5a	9030416H16Rik|E230024D05Rik|mKIAA0648	7569				1	5.38163	5.262	5.90669	6.03341	6.17737	6.35768	5.698	5.87738	6.35293	6.24897	6.69459	6.88777	6.98895	6.95459	6.81919	6.96724	6.25873	6.85955	6.59628	6.47688	5.2733	5.50274	5.69888	6.03306	6.14667	5.96724	6.12255	5.97745	5.78405	6.37985	6.47508	6.68727	7.06719	6.32549	6.91876	6.82997	7.10733	6.76274	6.3737
1	euxassay_007254_11.jpg	NM_172134	216134	Pdxk	2310036D04Rik|AA119688|C77999	7569				1	4.95868	5.15719	5.50758	4.90159	5.51911	5.67515	5.57494	5.61053	6.13002	5.90284	5.67029	5.70348	5.58547	6.14783	6.09878	6.29629	6.41062	6.50307	6.63955	5.8097	5.01146	5.13911	5.08347	5.42097	5.4464	5.32082	5.43268	5.60482	5.40367	5.73341	5.74592	5.6823	5.69319	6.482	5.6937	5.94118	6.33321	6.47631	6.2295
1	euxassay_019474_11.jpg	NM_011066	18627	Per2	mKIAA0347|mPer2	7569				1	4.80786	5.43896	5.81332	5.78064	4.96666	5.62261	5.80091	5.27062	5.27476	5.7487	5.77675	5.80999	5.916	5.75317	5.4969	5.55772	5.91467	5.9397	5.6452	5.18948	5.37215	5.61826	5.52038	5.11588	5.79803	5.24266	5.48383	5.80283	5.9514	6.05026	6.12566	6.53124	6.38355	6.0861	5.87698	5.91068	6.46383	6.61948	6.18525
1	euxassay_019252_11.jpg	NM_023217	66522	Pgpep1	2810003H13Rik|Gm19458|PAP-I|PGP|PGP-I|PGPI|Pcp	7569				1	6.04305	6.24535	6.58404	6.60477	6.64831	6.57846	6.48043	6.414	6.35738	6.60439	7.13376	7.21217	7.05228	7.37804	7.29024	7.31259	7.18092	7.15573	7.25268	6.95253	6.04183	6.4962	6.86434	6.43916	6.6012	6.57398	6.51356	6.74637	6.55251	6.75209	7.33666	7.40257	6.88099	7.13741	7.37554	7.28264	7.09489	7.26836	6.91689
1	euxassay_007706_14.jpg	NM_001033257	215789	Phactr2	AV158170|BC012871	7569				1	3.80239	3.80622	3.77728	3.74776	3.69303	3.6785	3.80813	3.95524	4.18058	4.44773	4.45944	4.50392	4.82782	5.02975	4.81193	4.79586	5.19989	5.10248	4.63744	4.51658	3.76947	3.64472	3.54982	3.59253	3.59827	3.73938	3.66803	3.73938	3.72974	3.98389	4.61275	4.82443	4.76672	5.03073	5.48543	4.93127	4.6655	4.93232	4.57693
1	euxassay_000418_11.jpg	NM_026737	68479	Phf5a	1110007B08Rik	7569				1	5.89522	6.0492	5.78422	5.607	5.54998	5.75286	5.58045	5.77888	5.5619	5.71114	5.96017	6.45118	6.48528	6.10694	6.54315	6.14858	6.15834	6.30503	6.37159	6.41807	5.99164	6.03035	5.72909	5.85035	5.84358	5.90066	5.66555	5.59481	5.68081	5.40303	5.98485	6.15759	6.15722	6.24895	6.32956	6.22343	6.0492	6.09096	5.94984
1	euxassay_010722_11.jpg	XM_129968	98432	Phlpp1	AI836256|Phlpp|Plekhe1|SCOP|mKIAA0606	7569				2	3.76688	4.0289	4.08192	4.384	4.20001	3.99813	3.81208	3.72506	3.7821	3.88007	3.89308	3.97589	4.34194	4.38016	4.54373	4.34903	4.92343	4.72255	4.52366	4.41673	3.85068	3.96986	3.67585	3.91971	4.05298	3.68154	4.14317	3.70408	4.24812	3.91198	3.97543	4.28746	4.34903	4.61545	4.82564	4.27562	5.01254	4.39395	4.22508
1	euxassay_010722_14.jpg	XM_129968	98432	Phlpp1	AI836256|Phlpp|Plekhe1|SCOP|mKIAA0606	7569				2	4.77976	4.14726	4.39784	4.94499	4.47465	4.30864	4.66122	4.72928	4.77746	5.05051	4.42555	4.68879	4.61688	5.08127	5.54669	5.07245	5.15768	5.32697	4.91285	5.33607	4.97397	4.15965	5.00862	4.61455	4.69178	4.9797	4.5873	4.87228	4.56558	5.14931	4.90752	4.86257	4.89295	5.2186	4.99701	5.08735	5.24541	4.9422	4.9607
1	euxassay_007085_14.jpg	NM_031256	83435	Plekha3	FAPP1	7569				1	6.81352	6.9041	6.57745	6.42274	6.44545	6.3868	6.14435	6.33363	6.6663	6.68161	6.81002	7.1254	7.01323	7.11792	7.11387	7.15719	7.09787	6.75209	6.64003	6.90403	6.36984	6.4302	6.3032	6.45891	6.25825	6.42013	6.80465	6.63761	6.46509	6.95789	6.68239	6.70983	6.93842	6.80537	6.78589	7.01013	6.73601	6.88314	6.81359
1	euxassay_002876_11.jpg	NM_026383	52830	Pnrc2	0610011E17Rik|D4Bwg0593e|MGC11707	7569				1	5.92984	6.13041	6.36469	6.12697	6.19711	6.15198	5.90865	6.12965	6.53252	6.79219	6.92212	7.15229	6.97404	7.21233	7.07213	6.89031	7.37857	7.24313	7.19602	7.07451	6.05365	6.67973	6.7427	6.56279	6.39389	6.44293	6.31287	6.24545	6.57068	6.53943	7.02421	7.22328	7.15567	6.99982	7.24989	7.23868	6.93841	7.09599	7.07403
1	euxassay_015919_14.jpg	NM_013723	27205	Podxl	AW121214|Ly102|PC|PCLP-1|Pclp1		marker			1	4.17703	3.99512	4.36879	4.3824	4.10965	4.29255	4.46818	4.26224	4.34476	4.26918	4.45484	4.48975	4.58633	5.28076	4.49805	4.6914	4.8765	4.99601	4.69759	4.68206	4.10189	4.48498	4.26779	4.35393	4.20254	4.3249	4.30206	4.3342	4.31956	4.95094	5.38097	4.72512	4.79511	4.97493	4.65368	4.54572	5.05827	4.92585	4.64623
1	euxassay_001087_11.jpg	NM_008893	18969	Pola2	AI573378	7569				1	5.0879	5.48217	5.68024	5.49076	5.60516	5.59392	5.39724	5.55149	5.70994	6.18342	6.25191	6.56019	7.05708	7.29594	6.98298	6.80031	6.68758	6.38905	6.07013	5.66626	5.14428	5.26509	5.62479	5.5906	5.37346	5.53775	5.40634	5.38348	5.58727	5.78802	6.14453	6.84478	6.91925	7.25853	6.90193	6.95587	6.45156	6.53102	6.09003
1	euxassay_002999_11.jpg	NM_008893	18969	Pola2	AI573378	7569				1	5.15782	4.82984	5.06429	5.13898	5.46231	5.27836	5.48873	5.4994	5.51468	5.53672	5.66967	5.812	6.42526	6.90973	7.16765	6.86802	6.52407	5.83371	5.58059	5.32149	5.32243	4.75859	4.96685	5.41112	5.64479	5.40672	5.53153	5.30361	5.43664	5.41426	5.75724	6.65125	6.96359	7.28604	6.9569	6.62334	6.25023	6.02604	5.91513
1	euxassay_010506_14.jpg	NM_011131	18971	Pold1	125kDa	7569				1	4.84891	4.31842	4.4823	4.9099	4.92686	4.97556	5.09294	5.15724	5.4844	5.20256	4.98951	5.34543	5.25703	5.67999	5.55429	5.64117	5.70633	5.4463	5.31152	5.1116	4.95504	4.46498	4.66905	4.47511	4.62555	4.49515	4.65893	4.72588	4.814	4.82195	5.25451	5.49741	5.48028	5.69909	5.43134	5.37856	4.97302	5.08115	5.2737
1	euxassay_004889_11.jpg	NM_145632	245841	Polr2h	MGC103049|MGC8248	7569				1	4.82035	5.06104	5.20416	5.04089	5.18813	5.01634	5.18666	5.37032	5.36514	5.74281	6.01647	6.24992	6.39412	6.26459	5.83602	6.00528	5.72038	5.40339	5.4252	5.25009	4.80705	4.99052	5.09505	4.97106	4.89228	5.22859	4.89139	5.14649	5.47674	5.36255	5.43474	5.6628	5.70847	6.03084	5.89333	5.92489	5.94715	5.87205	5.76508
1	euxassay_019622_11.jpg	NM_0111381	18987	Pou2f2	MGC124154|MGC124155|MGC124156|Oct-2|Oct2a|Oct2b|Otf-2|Otf2		marker	mouseTF		1	5.61302	5.47628	5.38307	5.23686	5.37537	5.40518	5.4082	5.41197	5.28862	5.51091	5.79351	5.91856	5.56609	5.81417	5.73572	5.42098	5.64957	5.7321	5.50457	5.32507	5.60152	5.54152	5.71938	5.43439	5.1283	4.9036	4.91108	5.1438	5.48823	5.66102	5.50739	5.74949	5.85794	5.63738	5.74172	5.83734	5.54839	5.61335	5.46083
1	euxassay_006582_11.jpg	NM_080555	67916	Ppap2b	1110003O22Rik|2610002D05Rik|AV025606|D4Bwg0538e|D4Bwg1535e|Lpp3|Ppab2b	7569				2	5.46933	5.64389	5.32541	5.37867	5.38252	6.05238	5.57687	5.84253	6.3165	6.69472	7.19703	7.16037	7.18134	7.08106	6.67916	6.86312	7.13713	7.0957	6.80822	6.94417	5.08895	5.59309	5.27018	5.17799	5.55609	5.33565	6.35841	6.17922	6.75639	6.47395	7.00234	6.86685	7.11285	7.1306	7.02256	7.26308	6.83952	7.19469	7.23993
1	euxassay_006582_14.jpg	NM_080555	67916	Ppap2b	1110003O22Rik|2610002D05Rik|AV025606|D4Bwg0538e|D4Bwg1535e|Lpp3|Ppab2b	7569				2	5.99018	6.10175	6.07783	5.97556	5.76118	6.11114	5.92791	6.32418	6.6926	6.53592	6.93222	6.90973	7.07768	7.19391	7.04891	7.04915	7.07006	7.19653	7.1827	7.20373	6.05791	5.97582	6.04987	5.8383	5.8476	6.15296	6.24178	6.32512	6.54562	6.58205	7.06001	7.17835	6.99413	7.18645	7.20329	6.78096	6.8576	7.00989	7.16628
1	euxassay_006699_11.jpg	NM_008904	19017	Ppargc1a	A830037N07Rik|ENSMUSG00000079510|Gm11133|PGC-1|PGC-1v|Pgc-1alpha|Pgc1|Pgco1|Ppargc1	7557		mouseTF		1	4.62013	5.37696	5.02153	4.66273	4.54682	4.71981	4.44746	4.42076	4.52748	4.59934	4.62685	5.28361	4.63977	4.98167	4.80829	5.02858	5.05775	4.86219	4.89919	5.05968	4.9602	5.01477	4.68409	4.49373	4.18202	4.37514	4.53442	4.20827	4.47078	4.72103	5.17953	4.86219	5.15094	5.20582	4.80141	5.18394	5.12361	5.15454	5.33137
1	euxassay_001697_11.jpg	NM_021391	58200	Ppp1r1a	0610038N18Rik|I-1	7557|7569				2	5.14067	4.71574	4.86465	4.83045	4.67509	5.125	4.77298	5.33587	5.07629	5.30086	5.66634	5.36949	5.56259	5.87153	6.05355	6.01689	6.12998	5.85836	6.19086	5.85514	5.18824	4.75423	4.77633	4.60906	4.42836	4.6053	4.49182	4.59776	4.55163	4.56137	5.19981	5.24278	5.83067	5.80673	5.87114	6.13987	6.06591	6.13727	6.32892
1	euxassay_001697_14.jpg	NM_021391	58200	Ppp1r1a	0610038N18Rik|I-1	7557|7569				2	5.58456	5.83349	5.27873	5.60117	5.29515	5.40074	5.71845	6.40412	6.81385	6.28755	6.73202	6.6982	6.54503	6.3912	6.75104	6.42852	6.76024	6.44848	6.90343	6.49543	5.63382	5.91279	5.8363	5.34267	5.58233	5.43387	5.20314	5.57842	6.2738	5.92779	6.45343	6.32035	6.78143	6.82166	6.24077	5.98442	6.3646	6.48974	6.61408
1	euxassay_009929_11.jpg	NM_007453	11758	Prdx6	1-cysPrx|9430088D19Rik|AA690119|Aop2|Aop2-rs3|Brp-12|CP-3|GPx|KIAA0106|Ltw-4|Ltw4|Lvtw-4|ORF06|Prdx5|Prdx6-rs3|aiPLA2|mKIAA0106	7569				1	3.95906	3.99612	4.14096	4.13337	4.01938	4.0078	3.92051	4.45418	4.64458	4.70422	4.30538	4.34929	4.62415	4.66789	4.9522	5.06584	4.50918	4.72861	5.11523	4.88688	4.13945	3.6517	4.20175	4.1119	4.02102	3.96567	3.94153	4.33215	4.44194	3.92579	4.48433	4.65416	4.61436	4.90928	5.04979	4.88778	4.7859	4.64352	4.78977
1	euxassay_009982_11.jpg	NM_008857	18759	Prkci	2310021H13Rik|AI427505|KIAA4165|PKClambda|Pkci|Pkcl|Prkcl|aPKClambda|mKIAA4165		marker			1	3.52515	3.86475	3.90988	3.80101	3.60636	3.65171	3.66945	3.66187	3.55409	4.00514	3.9377	3.76923	4.18687	3.9356	4.18687	3.88659	4.34667	3.90383	4.88598	3.20361	3.44155	3.64104	3.65171	3.64745	3.96738	3.54359	3.81056	3.892	3.75505	3.97079	3.96669	4.32444	4.40534	4.08287	4.30835	3.82005	3.78327	3.66693	4.06957
1	euxassay_002033_14.jpg	NM_030024	78004	Prr15	E130201N16Rik|G90	7569				1	3.99015	4.11257	4.2197	4.28007	3.96983	4.08922	4.34198	4.02174	4.3668	4.57055	4.40765	5.00177	5.21314	4.71284	4.70978	4.3978	4.66751	4.95171	4.69376	3.98712	3.93955	4.10305	4.12553	4.28908	4.02643	4.00353	4.77563	4.16415	4.41519	4.39247	4.59618	5.11171	4.94739	5.18698	4.55813	4.68195	4.58954	4.50735	4.68195
1	euxassay_001255_11.jpg	NM_008949	19183	Psmc3ip	C79099|GT198|HOP2|Tbpip	7569				1	5.38885	5.86266	5.99371	5.66957	5.57455	5.61436	5.70381	5.84937	5.8477	5.86651	5.94822	6.55884	6.82541	6.55133	6.53102	6.24432	6.2823	5.84017	6.17624	6.24813	5.47859	5.77228	6.01716	6.33806	5.93256	5.60846	5.80246	5.88398	5.90286	5.65692	5.68773	5.70196	6.12307	6.60732	6.778	6.61748	6.45742	6.43165	6.35656
1	euxassay_006198_11.jpg	NM_011192	19192	Psme3	AA410043|AU020960|Ki|PA28gamma|REGgamma|pa28g	7569				1	3.85187	3.93806	3.80486	4.22481	4.38299	4.48673	4.16352	4.35323	4.53362	4.61655	5.07538	5.71358	5.79234	5.61629	5.8571	5.6939	5.57854	5.40024	5.33343	4.52413	3.9691	4.15304	3.82196	4.20177	3.98268	4.39827	4.70012	4.83448	4.75775	4.85622	5.39644	5.79089	6.00121	5.9851	5.705	5.27253	5.47711	4.89553	4.76955
1	euxassay_007810_11.jpg	NM_133900	100678	Psph	AI480570|PSP|PSPase	7569				1	3.51484	3.4547	3.62548	3.52602	3.90557	3.93939	3.42517	4.01669	4.06155	4.12356	4.4111	4.17593	4.835	5.1186	4.77655	5.34055	5.76104	5.4399	4.92429	5.69155	3.69891	3.89483	4.57609	4.38371	4.12172	4.43649	3.67401	4.03637	4.03049	3.9887	5.43324	5.06884	5.24656	4.33847	5.34529	4.86282	5.53493	5.39032	5.38111
1	euxassay_003651_11.jpg	NM_019976	56742	Psrc1	5430413I02Rik|AL033312|Dda3|MGC7063	7569				1	5.77376	5.60335	5.60288	5.85038	5.43465	5.47691	5.52454	5.45985	5.96394	5.7358	6.1485	6.09126	6.28803	6.48789	6.27636	6.1605	6.01358	6.22478	6.47323	6.48283	5.14023	5.37189	5.51447	5.31569	5.2293	5.65008	5.56178	5.3645	5.71561	6.14473	6.08459	6.4453	6.35255	6.3328	6.32082	6.05113	6.11767	6.62088	6.94635
1	euxassay_003385_11.jpg	NM_008961	19212	Pter	AI790318|Mpr56-1	7569				1	4.55389	4.56747	4.61186	4.5787	4.5686	4.80199	4.71921	4.73635	4.92528	5.3656	5.63957	5.56636	5.25409	5.3012	5.27577	5.50485	5.4487	5.46838	5.52657	5.22952	4.53558	4.59427	4.71311	4.78348	4.6066	4.66716	4.81912	4.71799	5.05149	5.30769	5.47488	5.64726	5.2708	5.17288	5.27494	5.81553	5.5825	5.58317	5.17021
1	euxassay_007366_14.jpg	NM_011197	19221	Ptgfrn	4833445A08Rik|AU042434|CD9P-1|FPRP|Trim45	7569				1	5.18711	4.73124	5.01932	4.92661	4.87656	4.87838	4.95014	4.98599	4.70894	6.20414	6.82826	7.14698	6.86609	6.68008	6.11598	5.8891	6.38348	7.03752	7.48395	7.11796	5.58735	4.72115	4.71811	4.7797	4.97668	4.96047	4.87565	4.79999	4.96561	5.32079	5.39695	6.59309	6.37191	6.33797	7.05594	6.48361	6.90116	7.11079	7.39456
1	euxassay_012259_14.jpg	NM_021881	19317	Qk	1110003F05Rik|1500005P18|QkI|l(17)-1Wis|l17Wis1	7557|7569				2	5.82663	4.85584	5.42233	5.23002	4.58349	4.70627	5.30559	5.23002	6.06636	6.64136	7.09543	6.91238	7.08445	7.18114	6.48043	7.09914	7.37547	6.84843	6.66077	6.55444	4.80145	4.74876	5.09661	4.68565	4.43331	5.04576	4.91549	5.7222	6.77788	6.73714	7.26082	7.40997	6.85468	7.09172	7.01757	6.95972	7.24312	7.04372	6.90815
1	euxassay_010685_11.jpg	NM_009013	19362	Rad51ap1	2510006L10Rik|RAB22	7569				1	4.50714	4.28317	4.10566	4.23534	4.06657	3.74825	4.50747	4.16282	4.15234	4.26224	4.40527	4.48617	4.61931	4.99266	5.16638	4.96641	4.50747	4.38751	4.40779	4.46092	4.07066	4.27609	4.43486	4.16559	4.27963	4.3487	4.28845	4.35393	3.87488	4.19235	4.38623	4.6473	4.60511	4.89007	5.13783	4.93443	4.64517	4.37855	4.48856
1	euxassay_006677_11.jpg	NM_009025	19414	Rasa3	AI326412|C86362|E130011G04|GAPIII	7569				1	4.70114	4.89946	4.65098	4.13945	4.13489	4.17094	4.29044	4.34404	4.73665	4.81086	4.81258	4.69496	4.82281	4.75912	4.82846	4.74842	4.86632	4.97225	4.64715	4.93606	4.4554	4.26704	4.28497	4.16499	4.23618	4.31212	4.36494	4.42836	4.35714	4.7276	4.56103	4.65946	4.99974	4.97106	4.8279	4.68752	5.24249	5.19427	4.62263
1	euxassay_006256_11.jpg	NM_178045	213391	Rassf4	3830411C14Rik|AD037|AI586137	7569				2	3.85185	4.28634	4.50095	4.90036	4.5127	4.76148	4.6584	4.96509	4.67	4.89767	5.79474	6.57005	6.33843	5.81197	6.15901	6.08694	6.71533	5.72826	5.35643	5.61115	4.3215	4.50095	4.70422	4.89678	4.54396	4.21907	4.7516	5.09427	4.97531	5.95104	5.7695	6.08852	6.61626	6.54966	6.12771	6.2691	6.09103	6.06013	6.34718
1	euxassay_006256_14.jpg	NM_178045	213391	Rassf4	3830411C14Rik|AD037|AI586137	7569				2	4.26681	4.73367	5.02804	4.5813	4.44958	4.71792	4.92522	4.57996	5.08393	5.87625	6.30753	6.23618	6.72103	6.40373	6.86453	6.61103	6.53614	6.64866	6.77954	6.73396	4.06132	5.13318	4.72642	5.05433	4.68215	4.52253	4.74806	4.89645	5.25404	5.5697	5.65552	6.14172	6.53095	6.62879	6.25603	6.20783	6.42207	6.52748	6.34873
1	euxassay_011608_14.jpg	NM_009031	245688	Rbbp7	AA409861|AI173248|AU019541|BB114024|mRbAp46	7569				1	5.44949	5.27763	5.18739	5.25051	5.17488	5.15432	5.19427	4.97531	5.07759	5.52187	5.69523	6.13594	6.27325	5.92049	5.89701	5.74211	5.52535	5.31837	5.56042	5.46421	5.20198	4.81277	5.16746	5.54757	5.46409	5.12215	4.88706	4.58839	5.11323	5.23144	5.32958	6.12771	6.15136	6.30847	5.64998	5.47794	5.21254	5.12706	5.46928
1	euxassay_006452_11.jpg	NM_173867	108911	Rcc2	2610510H01Rik|2610529N02Rik|AA536646|AA675016|Td60|mKIAA1470	7569				1	4.90061	5.13111	4.92268	4.97531	5.42979	5.72776	5.95922	5.69255	5.80529	5.91607	6.28461	6.65839	6.90615	6.83936	6.86526	6.96572	6.93962	6.57426	6.93657	7.08445	4.40188	4.91738	5.53041	4.93994	5.85038	6.6156	5.84069	6.41086	6.20536	6.25972	6.4453	6.74438	6.52027	6.84425	6.85491	6.9863	6.94223	7.05421	6.5159
1	euxassay_006169_14.jpg	NM_009037	19672	Rcn1	Rcn	7569				1	4.32972	4.19117	4.18363	4.41378	4.40947	4.2234	4.40732	4.49117	4.59146	5.30802	5.91974	5.65154	5.99456	5.97248	6.10514	6.07217	6.11575	6.20578	6.23658	5.31781	4.18237	4.04485	4.09126	4.21356	4.18992	4.27518	4.31139	4.43722	4.47478	4.91361	5.85198	5.54571	6.0478	6.07251	6.07659	5.95191	6.06671	6.07279	6.28467
1	euxassay_008185_11.jpg	NM_025654	66599	Rdm1	2410008M22Rik|AW212028|Rad52b	7569				1	4.74461	4.52129	4.69596	5.0554	5.17647	5.24317	5.21755	5.13875	5.61626	5.51052	5.57314	5.76221	6.30149	6.39284	6.39627	6.13288	5.99454	5.90241	5.8211	5.6449	5.13145	5.23808	5.2725	5.34686	5.44506	5.30368	5.16222	5.34685	5.44045	5.54972	5.44873	5.90174	6.41424	6.31656	6.40481	6.31857	5.84081	5.91972	5.55484
1	euxassay_004457_14.jpg	NM_178606	28193	Reep3	D10Ucla1	7569				1	5.86457	6.22751	6.13071	6.31353	6.3391	5.9527	5.9016	6.70663	6.31152	6.29037	6.25806	6.21986	6.27638	6.55701	6.5471	6.90398	6.30302	6.77233	6.50325	6.47757	5.53013	6.04494	6.57304	6.1393	6.38956	6.21555	5.65479	6.32638	6.61409	6.41433	6.25093	6.40906	6.47649	6.82474	5.99303	6.38892	6.8862	6.78634	6.92233
1	euxassay_019670_11.jpg	NM_0090561	19725	Rfx2	5430432H19Rik	7569		mouseTF		1	4.53856	4.56047	4.47222	4.40117	4.42524	4.46207	4.55638	4.54269	4.39813	4.68034	5.0481	5.25535	5.05679	4.9099	5.30566	5.20843	4.71005	4.78056	4.73945	4.55229	4.79584	4.67031	4.65893	4.74872	4.73915	4.67533	4.56589	4.69898	4.8644	4.66779	5.08351	4.92475	5.07498	5.06448	5.051	4.85778	5.0108	4.93002	4.70882
1	euxassay_005798_11.jpg	NM_027689	71137	Rfx4	4933412G19Rik|NYD-sp10	7569				1	3.38489	3.38489	3.38489	3.39635	3.38681	3.38489	3.3805	3.38489	3.38489	3.38489	3.36057	3.93127	4.03409	3.88397	3.64496	3.68112	3.42595	3.80097	3.63394	3.21032	3.06876	3.38489	3.39063	3.38489	3.41713	3.56013	3.77276	3.35834	3.4762	3.5504	4.46577	3.31987	3.39799	4.5326	3.93127	3.61724	3.84307	3.5543	3.47826
1	euxassay_007168_11.jpg	NM_177740	244058	Rgma	BC059072|C230063O06|MGC38550|MGC69915	7557|7558|7569				1	6.73232	7.11051	6.2414	6.1046	6.12496	6.29015	6.22649	6.91742	7.06359	7.21088	7.01137	7.10796	7.08736	6.66346	7.29208	7.25394	7.38266	7.44342	7.37442	7.31577	6.77251	6.64136	6.12112	6.16348	6.20028	6.09908	6.56023	7.23576	7.15078	7.00764	6.86145	7.39738	7.00789	7.32944	7.35708	6.94968	6.92852	7.12735	7.10842
1	euxassay_009661_14.jpg	NM_021374	58175	Rgs20	2900073E09Rik|MGC151302|MGC151306|Rgsz1	7569				1	3.45959	3.40767	3.53758	3.6472	3.48129	3.53413	3.6083	3.62301	3.70979	3.76831	4.35959	4.36946	4.14322	3.98157	4.59372	3.89031	3.89648	4.09445	3.9072	3.81909	3.46686	3.57169	3.55985	3.62788	3.70431	3.66514	3.58916	3.61742	3.53487	3.69196	4.08234	4.35945	4.12234	4.62468	4.41526	3.94039	4.59656	4.07828	4.21526
1	euxassay_005137_11.jpg	NM_021430	75695	Rilpl1	2900002H16Rik|6330559I19Rik|FLJ39378|GOSPEL	7569				1	3.77392	3.45196	3.39405	4.14058	4.30673	4.09206	4.20502	4.14058	4.19848	4.13147	4.42991	4.85099	4.83704	4.89754	5.14542	5.15445	4.92795	4.81534	4.39862	4.3399	3.99109	3.7885	4.10377	3.92139	4.35942	3.95279	4.19957	4.32484	4.10726	4.34075	4.6861	5.41117	4.66639	4.76064	4.89908	4.73507	4.45401	4.58477	4.32627
1	euxassay_004223_11.jpg	NM_026001	67153	Rnaseh2b	1110019N06Rik|2610207P08Rik|Dleu8	7569				1	4.77493	4.65371	4.86883	4.60781	4.59017	4.42587	4.1455	4.7917	4.63601	4.80036	4.95133	5.24066	6.18127	5.98011	5.68996	6.20428	6.36881	6.02511	5.33501	5.54299	4.15045	4.60561	4.75387	4.85466	4.66729	4.32017	4.24607	4.55423	4.63386	5.07458	4.68773	4.90661	5.88521	6.2097	4.84473	5.90095	6.25763	5.83415	6.38328
1	euxassay_010508_11.jpg	NM_027934	71816	Rnf180	3110001E11Rik|Rines	7569				1	4.23786	4.77148	4.68064	4.37882	4.37772	4.40608	4.46912	4.6492	4.46912	4.42254	5.23451	5.31188	6.08353	5.74546	5.75291	5.61362	6.03057	6.16137	5.88129	5.32527	4.32841	4.52821	4.7025	4.65875	4.4558	4.24934	4.86167	4.64813	4.88356	5.03384	5.45457	5.14448	5.5614	5.99121	6.04237	5.9386	6.15463	6.08235	6.00999
1	euxassay_005086_14.jpg	NM_021419	58230	Rnf8	3830404E21Rik|AIP37	7569				1	4.56409	4.87816	5.88749	5.86291	5.74598	5.62777	5.28087	5.10728	5.30393	5.26642	5.43847	5.34296	6.10162	6.07006	6.12679	5.87252	6.12593	5.86188	5.67018	5.36258	4.54715	4.6125	5.35916	5.81851	5.6936	5.79777	5.35623	5.39437	5.68934	5.45683	5.28863	5.50925	6.04782	6.17833	6.15209	6.3564	5.90164	6.27439	5.45813
1	euxassay_013667_11.jpg	NM_001038696	67225	Rnpc3	2810441O16Rik|AI447568|C030014B17Rik	7557				1	4.19614	4.51337	4.84911	4.57231	4.42125	4.47989	4.44562	4.33083	4.5451	4.54396	4.80418	4.96509	4.85861	4.68876	4.77716	4.93919	4.98209	4.93745	4.9522	4.77716	4.1556	4.58349	5.0014	4.58572	4.59791	4.66263	4.49148	4.76149	4.59127	4.76738	4.73965	4.8061	4.6531	4.72457	4.82319	4.78493	4.79651	4.70114	4.67628
1	euxassay_004500_14.jpg	NM_011284	19891	Rpa2	AA409079|AI325195|AU020965|RPA34|Rf-A2	7569				1	4.5197	4.85016	4.50262	4.59648	4.35936	4.31748	4.96459	4.65764	4.79059	5.26924	6.24706	6.18158	6.1272	6.19914	6.36358	6.62436	6.37231	5.30211	5.06811	5.18361	4.42586	4.07274	4.27907	4.27907	4.29082	4.29782	4.33461	4.45956	4.47406	5.53996	5.9527	6.40484	6.32711	6.69826	6.05871	5.86237	5.38373	6.00979	5.66903
1	euxassay_013950_11.jpg	NM_026467	67941	Rps27l	1810034D23Rik	7569				1	4.96068	4.8883	5.06287	5.148	5.19752	5.01055	5.1054	5.57193	5.87933	5.50878	5.72776	6.25972	6.62142	6.38392	6.24711	6.11227	6.23794	5.91386	5.60359	5.50526	4.65735	5.08878	4.98715	5.08012	5.1075	5.05302	5.05141	4.99806	5.38893	6.07629	5.98939	6.35517	6.79386	6.5678	5.93322	6.37526	6.19117	5.89243	5.73931
1	euxassay_001882_11.jpg	NM_021383	58184	Rqcd1	2610007F23Rik|AI593551|Fl10	7569				1	4.88236	5.55498	5.53783	5.28861	5.44275	5.24136	5.06823	5.22217	5.62421	5.67968	6.40507	6.70277	6.59049	6.80207	6.91477	6.5714	6.84982	6.1332	6.16438	6.19927	5.03683	5.1734	5.31233	5.72826	5.26934	5.2293	5.46639	5.38587	5.32318	6.01573	6.07637	6.74433	6.58248	7.0984	6.52863	6.69629	6.50835	6.43836	6.01771
1	euxassay_000198_14.jpg	NM_021390	58198	Sall1	Msal-3	7540		mouseTF		1	4.3701	4.18156	4.40533	4.44266	4.43379	4.5937	4.81142	5.46348	6.38382	6.90898	6.9729	6.98655	6.8035	6.82204	6.95136	7.1216	6.89793	6.86736	6.46998	6.47899	3.78324	4.12572	4.01507	4.31157	4.34665	4.46316	4.73041	4.99956	5.97502	6.64724	6.75891	7.01954	7.01633	7.14716	6.72355	6.98497	7.03197	6.79414	6.26796
1	euxassay_000744_11.jpg	NM_025436	66234	Sc4mol	1500001G16Rik|C78600|DESP4|ERG25	7569				1	5.34883	5.22634	5.40234	5.45601	5.37169	5.51638	6.43174	5.66595	5.09347	4.87143	5.04574	5.36707	6.01894	6.29178	6.63385	6.2212	6.4413	6.61516	6.26215	6.04061	4.6543	4.72094	5.80344	5.43288	5.80549	5.77904	6.35404	5.98137	5.1129	5.17412	5.53205	6.32448	6.2464	6.6483	6.56243	6.04102	5.90228	6.06436	5.88882
1	euxassay_012236_11.jpg	NM_024450	30049	Scd3	4930513N16Rik	7569				1	5.55314	5.0062	4.50067	5.37597	5.07519	6.01637	5.77378	6.00394	5.8969	5.27084	5.97849	6.25943	6.25691	5.20717	5.8482	6.38826	6.05763	6.31404	6.4737	6.45116	5.4426	4.18093	4.39923	4.03374	4.5264	5.85634	5.12504	5.56334	5.66215	6.04214	6.11449	6.44951	6.35607	6.57447	6.76903	6.12372	6.49109	6.7727	6.24104
1	euxassay_002043_11.jpg	NM_026377	67788	Sfr1	6330577E15Rik|Meir5	7569				1	5.7178	5.55617	5.54041	5.58851	5.72205	5.58049	5.38261	5.34129	5.56703	5.15319	5.57311	6.05423	6.78785	6.60859	6.71739	7.01131	6.52324	6.40384	6.46682	6.63954	5.80754	5.73295	5.95952	5.41001	5.40397	5.51259	5.34366	5.55071	5.78096	5.22952	5.45748	5.86312	6.45371	6.61252	6.81743	6.60233	6.3647	5.77454	5.78794
1	euxassay_011305_11.jpg	XM_920534	66625	Sfrs18	5730406M06Rik|AA673174|Pnisr|Srsf18	7469				2	6.21433	6.27029	6.20877	5.83962	5.74245	5.57385	5.79041	5.95965	5.94974	6.14548	6.34106	6.39635	6.62576	6.36687	6.47534	6.62386	6.33148	6.42803	6.15113	5.78072	5.8876	6.11772	6.21957	6.0092	6.04986	6.02194	5.99993	5.90758	5.75098	5.96778	6.21402	6.43144	6.33048	6.26876	6.36525	6.31915	6.65309	6.7291	6.58988
1	euxassay_011305_14.jpg	XM_920534	66625	Sfrs18	5730406M06Rik|AA673174|Pnisr|Srsf18	7469				2	6.43942	6.63628	6.33884	6.24811	6.13223	6.31276	6.20117	6.22708	6.43451	6.47021	6.52127	6.64816	6.80189	6.79288	6.98196	6.96378	6.64095	6.67977	6.5515	6.15468	5.89209	6.19484	6.52162	6.47084	6.31648	6.20487	6.1719	6.29623	6.28887	6.16387	6.31769	6.51708	6.58402	6.78127	6.83561	6.66603	6.61991	6.5425	6.50901
1	euxassay_008435_11.jpg	NM_172788	237353	Sh3rf3	4831416G18Rik|Igfbp5-ip|Sh3md4|Sh3rf31	7469				1	6.7432	6.42376	5.70913	4.97385	4.67761	4.50363	4.85702	5.25701	5.45698	6.09841	6.32891	6.51919	6.98531	7.26747	6.27646	6.58356	7.23567	6.43227	5.79939	6.09411	6.25912	6.2737	4.88803	4.32588	5.01904	5.20291	4.40115	4.53047	5.16767	6.39485	6.25037	6.7122	5.83662	6.3403	6.52535	6.70602	5.82054	6.62356	6.69337
1	euxassay_009466_11.jpg	NM_009167	20418	Shc3	MGC124163|N-Shc|Rai|ShcC	7569				1	4.20981	4.42123	4.39861	4.2771	4.05723	3.85052	3.79962	3.93853	4.17431	4.56361	4.791	5.0248	5.24508	5.31185	5.2888	5.2472	5.1699	5.04598	5.01987	4.86346	4.11123	4.39426	4.39208	4.27296	4.04595	3.82812	3.76467	3.77447	4.05562	4.44719	4.73793	5.01161	5.1971	5.31923	5.36403	5.31319	5.25771	5.2087	5.16618
1	euxassay_001278_11.jpg	NM_030749	81500	Sil1	1810057E01Rik|AI042831|wz	7569				1	5.28496	5.52362	5.74638	5.59085	5.36445	5.66302	5.46014	5.53762	5.51876	5.34711	5.30602	5.3947	5.71463	5.89708	6.07405	6.14922	6.11262	5.9628	5.83745	5.9606	5.41322	5.66618	5.92156	5.53361	5.3947	5.64951	5.68333	5.71811	5.60598	5.89861	5.58514	5.73196	5.75122	5.77065	5.74184	5.7155	5.76855	5.99763	5.9473
1	euxassay_000858_11.jpg	NM_027921	71781	Slc16a14	1110004H10Rik	7557|7569				1	4.81283	4.91289	4.91643	4.63716	4.67112	4.76941	4.90845	4.86051	5.05468	5.64105	5.74434	5.36778	5.48456	5.50471	5.75872	5.65055	5.95908	6.3902	6.63145	5.73544	4.26157	4.16659	4.67007	4.72464	4.80042	4.83453	4.85129	5.0635	5.25197	5.0377	5.17197	5.01887	5.19913	5.68896	5.91699	5.63891	6.32051	6.05839	6.40427
1	euxassay_019716_11.jpg	NM_009197	20502	Slc16a2	AW105741|Mct8|Xpct	7538				1	5.36217	5.72459	5.75882	5.39157	5.32448	5.20498	5.16011	5.14811	5.5333	5.31444	5.45263	5.94287	6.18646	6.12845	6.4178	6.34637	6.24117	6.1613	5.79047	5.23367	5.54993	5.54593	5.97338	5.78515	5.36199	5.41242	5.14811	5.37492	5.37235	5.58931	5.83749	6.25558	6.3202	6.20939	6.28397	6.71547	6.42652	6.16316	5.5223
1	euxassay_001899_11.jpg	NM_148938	20512	Slc1a3	AI504299|B430115D02Rik|Eaat1|GLAST|GLAST-1|GLU-T|GluT-1|Gmt1|MGluT1	7569	marker			1	3.44605	3.31689	3.74758	3.50372	3.38905	3.60468	3.55644	3.60731	4.09016	3.90781	4.12732	5.06602	5.36724	4.58286	4.81953	4.93539	5.64028	5.50827	4.98051	4.81384	3.19615	3.38904	3.41933	3.49237	3.37057	3.35185	3.45485	3.68165	3.55372	3.99886	4.21625	4.10514	3.93112	4.77894	4.67108	4.61069	4.95361	4.87111	5.18382
1	euxassay_006704_11.jpg	NM_015829	50799	Slc25a13	AI785475|Ctrn	7569				1	4.19739	4.12421	3.55727	3.93979	3.94847	3.79332	3.99109	4.07338	3.87571	3.8537	4.2472	4.52853	4.9266	5.38817	5.14438	4.99052	4.78842	5.06232	4.74005	4.7756	4.26008	4.11499	3.68532	4.00281	3.59976	3.63889	3.6644	3.82005	3.68532	4.23335	4.5957	4.56894	4.89857	4.57903	5.51347	5.18593	4.52017	4.67502	4.59901
1	euxassay_000139_11.jpg	NM_026542	68066	Slc25a39	3010027G13Rik|D11Ertd333e|MGC144572|MGC144573	7569				1	6.54855	6.6838	6.67316	6.89625	6.51739	6.82254	6.60332	6.55743	6.57704	6.83355	6.51774	6.8492	7.03326	6.98295	6.88843	6.75201	6.90751	6.98396	7.05633	6.69838	6.80487	6.20916	6.74067	6.7174	6.80888	6.84865	6.55095	6.57972	6.43642	6.56591	6.26651	6.65004	6.9928	6.9504	6.6122	6.80573	6.85641	6.68037	7.03571
1	euxassay_010364_11.jpg	NM_011977	26457	Slc27a1	FATP1|Fatp	7569				1	4.33125	4.23947	4.27716	4.32273	4.25214	4.29196	4.5776	4.53812	4.8216	4.48184	4.65344	4.87829	5.33032	5.87638	6.02311	6.59942	6.08911	5.79845	5.90073	5.63324	4.02975	4.90243	4.74794	5.11594	4.76848	4.3762	4.61863	4.37774	4.67995	5.3054	5.73426	5.72338	6.42869	6.00725	6.12309	5.89482	5.8065	6.1263	5.64418
1	euxassay_018940_14.jpg	NM_011977	26457	Slc27a1	FATP1|Fatp	7569				1	5.95601	6.16629	6.19611	6.05464	5.86469	5.73887	5.88491	5.92398	6.23486	6.26852	6.47363	6.70572	6.90346	6.84637	6.79186	6.80483	6.65541	6.56247	6.37665	6.65572	5.65461	6.10123	5.9216	5.79596	5.637	5.75251	5.71027	5.90609	6.07492	6.59804	6.37046	6.66112	6.80769	6.91094	7.0517	6.94724	6.67625	6.51137	5.89464
1	euxassay_004834_11.jpg	NM_026404	67843	Slc35a4	2610030J16Rik|MGC143687|MGC143688	7569				1	4.35224	5.11135	5.00269	5.18685	4.97237	5.49376	5.05597	5.31318	5.54763	5.06831	5.42986	5.34676	5.91289	6.52897	6.69752	6.43945	6.55696	6.11639	6.08637	5.85472	4.46009	5.06951	5.2682	5.37442	5.30212	5.34367	5.13484	5.08021	5.07427	5.42567	5.25978	5.40467	6.13963	6.55282	6.40771	6.54475	6.06771	6.52499	6.1187
1	euxassay_019715_11.jpg	NM_023805	76257	Slc38a3	0610012J02Rik|D9Ucla2|Nat1|Slc38-3|Sn1|Snat3|mNAT	7469				1	5.49432	5.32949	5.39343	5.64479	5.49503	5.23731	5.27671	5.36648	5.83582	6.02	6.01505	6.14702	6.06619	6.22409	6.07691	6.30234	5.84839	5.98753	5.97993	5.90767	5.51409	5.3231	5.2424	5.09072	5.08601	5.24155	5.1933	5.26425	5.23305	5.34988	5.19001	5.26904	5.70288	5.89628	6.02185	5.77637	6.0602	6.20031	5.72729
1	euxassay_001539_14.jpg	NM_013797	28248	Slco1a1	A530084B21|OATP-1|Oatp1|Slc21a1	7569				1	5.12092	5.02501	5.55032	5.79926	5.76976	5.74777	5.67657	5.81643	5.84698	5.91118	6.52338	6.14692	6.28504	6.12658	6.14104	6.24015	6.48469	5.91441	6.28812	6.09175	5.27553	5.59032	5.24928	5.34027	5.79142	5.7405	5.25829	5.82722	5.83286	6.2011	5.82722	6.03909	6.18687	5.77889	6.44261	6.08153	5.97852	6.098	6.06805
1	euxassay_002759_11.jpg	NM_016769	17127	Smad3	AU022421|Madh3	7569		mouseTF		1	4.08049	4.13016	4.20014	4.11173	4.38412	4.13807	4.18817	4.14895	3.96	4.13077	4.14895	4.43639	4.30631	4.66463	4.57061	4.71554	4.85943	4.98521	4.89003	5.19667	4.34941	4.02446	4.17758	3.99259	4.10678	4.27188	4.04985	4.21259	4.20218	4.34469	4.26021	4.62359	4.576	5.27328	4.86604	4.67219	4.5128	4.42449	4.96687
1	euxassay_019553_11.jpg	NM_008541	17129	Smad5	1110051M15Rik|AI451355|Dwf-C|Madh5|MusMLP	7569		mouseTF		1	6.33611	6.75109	6.25518	6.23935	5.83415	6.07273	6.06277	6.24922	6.42927	6.69846	6.57879	6.37371	6.76747	7.11584	6.7199	6.66883	7.01583	6.89146	7.02004	7.00064	6.81299	6.71009	6.25658	6.36427	6.03818	6.26007	6.15451	6.68901	6.53993	6.77861	6.70277	6.72385	6.77627	6.88497	6.83866	7.02127	7.05277	6.74044	6.81295
1	euxassay_000017_11.jpg	NM_007790	13006	Smc3	Bamacan|Cspg6|HCAP|Mmip1|SMC-3|SmcD	7540				1	5.76823	5.69971	5.60079	5.8074	6.09397	6.04928	5.98493	5.98746	5.97604	6.31644	6.28885	6.14827	6.7061	6.73197	6.83712	6.73348	6.61364	6.3712	6.55177	6.80547	5.11207	5.70433	5.88472	6.47396	5.95035	6.10332	6.0517	6.19698	6.2084	6.18491	6.2663	6.20894	6.28338	6.54649	6.59911	6.44757	6.76157	6.95583	6.70559
1	euxassay_003378_14.jpg	NM_022316	64075	Smoc1	2600002F22Rik|AI848508|SRG	7569				1	3.66463	3.80696	4.19171	4.40346	4.36248	4.37799	4.36248	4.31495	4.41853	4.5825	4.58473	4.52053	4.70515	4.63592	4.6678	4.78057	4.78174	4.72832	4.63849	4.40724	4.5825	4.31495	4.24341	4.22638	4.1167	4.30823	4.24059	4.41101	4.37413	4.41478	4.71962	4.58918	4.63075	4.32565	4.57468	4.67744	4.72831	4.8949	4.62296
1	euxassay_009334_14.jpg	NM_175692	319317	Snhg11	A930034L06Rik|AI854265|AL022637|AW319638|E130013N09Rik	7539|7557				1	4.31572	4.43316	4.37563	4.5918	4.42721	4.49276	4.6024	4.64787	4.65297	4.78559	4.96771	5.06765	4.86914	4.93035	4.83473	4.96361	4.84592	4.93874	4.92614	4.72232	4.05401	4.60482	4.31115	4.26604	4.50481	4.45452	4.50598	4.58914	4.70184	4.83697	4.96772	4.94291	5.00912	4.7704	4.96053	4.94396	4.87133	4.87024	4.9533
1	euxassay_019554_11.jpg	NM_025507	66354	Snw1	2310008B08Rik|AW048543|MGC55033|NCoA-62|SKIP|Skiip	7569				1	6.58157	6.57414	6.85478	6.71202	6.76583	6.66201	6.51627	6.78506	6.36751	6.68646	6.74271	7.03129	7.15808	7.02585	6.54937	6.65574	6.79723	7.09211	6.62657	6.44683	5.70167	6.46975	6.39144	6.40258	6.62954	6.3664	6.26077	6.28681	6.36835	6.58515	7.09933	6.97888	6.84863	6.51877	6.87143	6.91215	6.91968	6.94266	6.58571
1	euxassay_011463_11.jpg	NM_024225	69178	Snx5	0910001N05Rik|1810032P22Rik|AU019504|D2Ertd52e	7569				1	5.31368	4.86779	5.23995	5.54985	4.96936	5.35539	5.21211	5.11292	5.56517	5.85414	6.16758	6.61707	6.52434	6.81916	7.01831	6.6932	6.47989	6.81323	6.51362	5.65062	5.18886	5.13893	5.29066	5.19762	5.21499	5.45437	5.49285	5.1998	5.67488	5.64048	5.86427	6.68668	6.49561	6.57594	6.49887	6.66788	6.69469	6.75085	5.88114
1	euxassay_005027_14.jpg	NM_021377	58178	Sorcs1	Sorcs	7557|7569				1	4.05034	4.07501	3.99971	4.23922	4.20858	3.98965	3.97807	4.11389	4.13489	4.03226	4.34667	4.66474	4.59901	4.96423	4.92255	4.75259	4.90125	4.46632	4.49622	4.34798	4.2561	4.17221	4.02102	4.13489	4.07908	3.96053	3.95759	4.1006	4.32855	4.11256	4.52319	4.85492	4.79074	4.70011	4.52899	4.32417	4.30808	4.44929	4.6078
1	euxassay_012191_11.jpg	NM_011436	20660	Sorl1	2900010L19Rik|AI596264|AW261561|LR11|SorLA|gp250|mSorLA	7538|7540				1	4.03086	4.23022	4.73765	4.77794	4.29698	4.1851	4.39471	4.44562	4.66874	5.27597	5.26934	5.1044	4.95994	4.91283	5.22717	5.19032	5.18372	4.98167	4.65098	4.62847	4.10353	4.68253	4.34982	4.13489	4.28552	4.28222	4.1638	4.34667	4.56556	4.82366	4.98926	5.1958	5.14234	5.11253	4.70729	4.91814	5.04737	5.10673	5.12177
1	euxassay_019627_11.jpg	NM_0092372	20675	Sox3	Sox-3	7569		mouseTF		1	5.40307	5.75819	5.68708	5.78121	5.60304	5.51113	5.83976	5.66385	5.71408	5.6754	6.04427	6.15489	6.42119	6.18751	6.50388	6.63224	6.67835	6.35517	6.77666	6.50946	5.70782	5.85355	5.64009	5.5029	5.57481	5.67383	5.64902	5.58479	5.56404	5.65751	6.42212	6.44744	6.52405	6.30975	6.47983	5.9763	6.4118	6.46297	5.82663
1	euxassay_006002_11.jpg	NM_011447	20681	Sox8	-	7569		mouseTF		1	4.48731	5.14347	5.51391	6.3199	5.52047	5.37023	5.3132	5.59864	5.61508	6.09579	6.30806	6.69819	6.60716	6.5317	6.90914	6.46898	6.75908	6.41068	6.6726	6.08098	5.05523	5.4429	5.38078	5.56602	5.45757	5.54422	5.36968	5.47176	5.92765	5.8579	6.04848	6.26375	6.63208	6.52625	6.82802	6.45469	6.6962	6.90876	6.37001
1	euxassay_002633_14.jpg	NM_011448	20682	Sox9	2010306G03Rik|AV220920|KIAA4243|mKIAA4243	7569	marker	mouseTF		1	3.81717	4.37589	3.83974	3.78763	3.90693	3.81229	3.98565	4.00146	4.0821	4.25517	5.03256	5.34466	5.7663	5.7197	5.83971	5.62497	5.87018	5.94643	6.1925	5.59124	4.22365	4.09555	3.86668	4.06167	3.81229	3.80412	3.86981	4.29421	4.21627	4.37369	5.12799	5.85364	5.92171	5.83971	6.27982	6.13256	5.73052	5.67871	6.12733
1	euxassay_009443_11.jpg	XM_901902	219140	Spata13	C79050|ESTM11|FLJ00298|X83327|mFLJ00298	7569				1	3.45428	3.61242	3.58978	3.57063	3.51162	3.46469	3.70489	3.50357	3.86433	3.90464	4.05435	4.34205	4.60505	5.26482	5.43195	5.83858	4.82553	5.55355	5.12329	5.79498	3.36514	3.70335	3.58406	3.6068	3.4914	3.59926	3.48936	3.89851	3.65849	3.61243	3.98638	4.36982	4.87644	4.87566	5.65686	5.10256	5.54752	5.10589	5.47832
1	euxassay_013924_11.jpg	NM_001029936	432572	Specc1	2810012G08Rik|B230396K10Rik|Cytsb|KIAA4061|mKIAA4061	7569				1	4.36344	4.56988	4.24021	4.47576	4.46975	4.31995	4.42069	4.44788	4.61964	4.75738	4.92505	5.39773	5.06011	5.4652	5.36504	5.27476	5.06571	5.06475	4.88547	4.84254	4.34646	4.6283	4.40942	4.55063	4.5755	4.41319	4.44543	4.67716	4.72239	4.59994	4.8483	5.0046	5.06251	5.15989	4.9828	5.3924	5.18331	4.97382	5.06667
1	euxassay_006294_11.jpg	NM_144550	212514	Spice1	Ccdc52|D16Ertd480e	7569				1	4.87976	5.01834	4.85703	5.27999	5.64193	5.22594	5.2961	5.31502	5.77585	5.60469	5.89468	6.00028	6.64617	6.78274	6.98335	6.54766	6.32349	6.41525	6.59955	6.32516	5.27556	5.28792	5.32438	5.18666	5.30289	5.67592	5.24066	5.7353	7.03397	6.13867	6.00695	6.19701	7.04716	7.02374	6.68668	6.70881	6.05153	6.54022	6.84751
1	euxassay_019566_11.jpg	NM_011488	20850	Stat5a	AA959963|STAT5	7569		mouseTF		1	5.10556	5.60565	5.77585	5.41875	5.53998	5.70869	5.5024	5.3619	5.34115	5.55984	5.97721	5.81095	5.56565	5.79948	5.92502	5.92426	5.93254	5.8464	5.65062	5.85117	5.50996	5.77804	5.72826	5.49226	5.34735	5.55254	5.39002	5.51447	5.41332	5.46815	5.79578	5.83241	6.09042	5.92841	5.93329	5.6588	5.601	5.83922	5.66423
1	euxassay_008526_11.jpg	NM_175162	71069	Stox2	4933409N07Rik|AI449080|AI835114|MGC107432|mKIAA1392	7569				1	3.53643	3.89358	3.76586	4.17076	4.28891	4.43069	4.01423	4.69588	4.94431	5.07845	5.88018	6.22902	6.18299	5.76758	5.82469	5.66642	5.38732	6.07061	6.15312	5.98108	3.64078	3.58622	3.91322	4.01257	3.76192	4.35176	4.68657	4.35045	4.42448	4.8117	5.6358	5.91194	5.8894	5.87254	5.79555	5.36338	5.46268	5.42438	6.55133
1	euxassay_009444_11.jpg	NM_011499	20901	Strap	AW557906|C78091|C79202|Unrip	7569				1	4.67403	4.37379	4.67612	4.55178	5.07684	4.66142	4.53805	4.6979	4.90826	5.21488	5.01457	6.05871	5.85777	5.97284	5.47965	5.95658	5.85546	5.44474	5.04919	5.25294	4.74563	4.80991	4.70407	4.6458	4.75046	4.5699	4.85016	4.78576	4.56426	4.60435	4.97773	5.53889	5.84713	6.30633	5.91601	5.86649	5.86007	5.96216	5.3402
1	euxassay_006760_11.jpg	NM_144552	217517	Stxbp6	BC024598|C85317|MGC30948	7538				1	5.89301	5.76957	6.02124	6.25358	5.7778	5.70438	5.65274	5.75325	5.75868	5.85044	5.79619	6.21367	6.42212	6.373	6.25832	6.08143	5.93715	5.94064	5.99945	6.07511	5.65789	5.90872	5.85592	5.83922	5.60469	5.68374	5.56404	5.35081	5.60743	5.59145	5.87751	6.17203	6.66288	6.51677	6.30907	6.27946	6.18641	5.97077	5.84859
1	euxassay_018982_14.jpg	NM_011507	20917	Suclg2	AF171077|AW556404|D6Wsu120e|MGC91183	7569				1	4.33689	4.71441	4.83725	5.12044	5.3987	5.60643	5.90976	5.71417	5.60577	5.62798	5.44433	5.89959	5.63767	5.87194	5.8857	5.65145	5.56182	5.79694	5.71234	5.91389	4.88739	4.58525	4.85175	5.02504	4.7482	5.62928	5.59387	5.61234	5.32303	5.52452	5.5487	5.55075	5.54458	5.79954	5.96726	5.69078	5.82238	6.10078	5.89637
1	euxassay_010927_11.jpg	XM_917083	319565	Syne2	6820443O06Rik|AW546258|D12Ertd777e|MGC96690|NUA|Nesp2g|mKIAA1011	7540				1	4.24915	4.66809	5.35486	5.7444	5.67215	5.55361	5.29569	6.03443	6.16571	6.05097	6.15271	5.56109	5.70263	6.0654	6.39139	6.53486	6.18479	6.33333	6.4472	5.94775	4.34166	4.01308	4.07938	5.13452	5.08232	5.62225	5.22972	5.4844	5.66521	5.57931	5.6242	6.27574	6.54829	6.00228	6.01869	6.35816	6.48634	6.61358	6.32255
1	euxassay_001015_11.jpg	NM_030725	80976	Syt13	5730409J20Rik|AI549909|mKIAA1427	7557				1	5.48332	5.50214	5.63434	5.64216	5.85335	5.83093	5.72733	5.68121	5.67181	5.6952	5.97593	5.89474	6.14704	6.28671	6.19815	5.99825	6.13797	6.04756	6.22197	5.95713	5.67749	5.56638	5.66581	5.78467	5.79673	5.49175	5.67233	5.74537	6.03335	5.97253	5.83234	5.92099	6.01157	6.05441	6.09132	6.23267	6.06881	6.21767	6.15043
1	euxassay_002933_11.jpg	NM_030725	80976	Syt13	5730409J20Rik|AI549909|mKIAA1427	7557				1	5.31578	5.53503	5.50945	5.59871	5.72177	5.61897	5.81061	6.12079	5.93372	6.11618	6.00659	6.12578	6.00409	6.13379	6.05882	6.04634	6.18903	6.12118	6.25348	6.39283	5.35352	5.75974	5.74587	5.86433	5.75183	5.68173	5.76368	5.95196	6.06522	6.09913	6.03702	6.18352	6.04149	6.0807	6.03783	6.14176	6.07159	6.15906	6.51944
1	euxassay_012462_11.jpg	NM_198294	66860	Tanc1	1200003E16Rik|Tanc|mKIAA1728	7569				1	4.3469	4.89491	4.61272	4.863	4.37738	4.29462	4.77708	4.99883	4.50691	4.48764	4.49274	4.80766	5.2944	5.07078	5.11175	5.22568	5.30834	5.28679	5.12691	5.42059	5.12936	5.01007	4.65514	4.68583	4.24807	4.73707	4.40006	4.4029	4.08661	4.83359	5.17334	5.76771	5.87344	5.22078	5.41416	5.69972	5.47309	5.4591	4.92387
1	euxassay_000837_14.jpg	NM_026486	67978	Tctn2	4432405B04Rik|Tect2	7569				1	4.44621	5.08163	5.13083	5.25955	4.9552	4.83117	4.85827	4.8231	4.86299	5.49153	5.15095	5.48182	5.48796	5.26611	5.59701	5.23544	5.4849	5.48898	4.98876	5.41183	4.97654	4.9385	4.95603	4.78124	4.29139	4.74509	4.52777	4.61048	4.77833	5.02297	5.06531	5.42592	5.40229	5.45179	5.07757	5.22568	5.44182	5.85219	5.12624
1	euxassay_009223_11.jpg	NM_178667	211586	Tfdp2	1110029I05Rik|A330080J22Rik|DP-3|DP3	7569		mouseTF		2	3.93885	4.8882	4.83752	4.56938	4.39749	4.55505	4.64607	4.61515	4.86967	5.10832	5.0227	5.38172	5.3126	5.13796	5.2381	5.65949	5.40839	5.74699	6.00114	5.15906	3.8963	4.21197	4.79208	4.75826	4.52906	4.59614	5.14553	4.7824	4.74237	5.86323	4.78951	5.23574	5.22721	5.21671	5.65525	5.66089	5.87572	5.68117	5.44156
1	euxassay_009223_14.jpg	NM_178667	211586	Tfdp2	1110029I05Rik|A330080J22Rik|DP-3|DP3	7569		mouseTF		2	4.42806	4.56496	4.86914	4.79106	4.96463	5.14372	4.51476	4.64219	4.87461	5.66214	5.30128	5.36933	5.64119	5.57163	5.70536	5.49042	5.66531	5.65079	5.37496	5.3064	4.6228	4.78359	4.74568	4.3164	5.36323	4.72418	4.7508	4.76855	5.09363	5.539	5.43539	5.72497	5.85516	5.54825	5.93985	5.54367	5.5431	5.45935	5.21152
1	euxassay_019508_11.jpg	NM_173396	228839	Tgif2	4921501K24|5730599O09Rik|C80753|C81206	7569		mouseTF		1	5.99778	6.58265	6.23723	6.47624	6.51473	6.46085	6.57454	6.6613	6.78589	6.52027	6.7751	7.076	7.15303	7.31017	7.42395	7.28449	7.25478	7.41232	7.43917	7.20914	5.03439	6.03411	6.28974	6.28837	6.61979	6.70779	6.94397	6.67496	7.06881	6.54909	6.86961	6.86709	7.07279	7.27745	7.25173	7.33616	7.3886	7.25247	7.21778
1	euxassay_012036_11.jpg	NM_025435	66231	Thoc7	1500006O09Rik|9230101K24Rik|MGC151296|MGC151322|Nif3l1bp1	7569				1	5.23509	5.95597	5.22104	5.47794	5.38181	5.15252	5.20747	5.31722	5.2155	5.61087	5.50593	5.68352	6.17869	5.99652	6.00195	6.23368	6.2115	5.96308	6.01565	6.00902	5.55059	5.36801	5.40955	5.76621	5.47948	5.09002	4.96288	5.11798	5.5901	5.36023	5.92124	5.74587	5.87673	6.20846	6.28534	5.90986	6.77276	6.06477	6.16386
1	euxassay_002058_11.jpg	NM_145705	28113	Tinf2	AW552114|D14Wsu146e|Tin2	7569				1	4.5339	4.45692	4.47505	4.19484	4.78517	4.63521	4.66395	4.4574	4.42941	4.47481	4.81604	5.33756	5.9024	6.14821	6.29671	5.97453	6.11899	5.87207	5.7295	5.79332	4.4299	4.78517	4.8533	4.82625	4.97892	4.87986	4.7929	4.5362	4.62658	5.25349	6.32137	6.17286	6.17375	6.20494	6.26496	6.37141	6.32097	6.08586	5.89056
1	euxassay_001794_11.jpg	NM_025372	66131	Tipin	1110005A05Rik|1110018P21Rik	7569				2	4.4221	4.27392	4.58346	4.33211	4.39188	4.44681	4.1211	4.05513	4.02754	4.31208	4.78199	5.22429	5.4054	5.38636	6.34993	5.29336	5.04816	4.95562	4.4843	4.58235	4.55987	4.3558	4.18418	4.38422	4.02262	4.19297	4.46749	4.13333	4.40328	4.54621	5.34817	5.53838	5.29744	5.59143	5.65283	5.30097	4.41059	4.5716	4.39086
1	euxassay_011726_11.jpg	NM_009386	21872	Tjp1	ZO1	7469				1	3.94519	3.71636	3.94172	4.06336	3.64127	3.70821	3.81077	4.30553	4.68888	4.62101	4.86789	4.82988	4.9358	4.83457	5.49671	4.75942	5.10511	5.63215	5.00782	4.84222	4.12131	4.05052	4.05213	4.22923	3.78968	4.32031	4.15019	4.44575	4.76159	5.26317	4.88607	4.61448	4.91735	5.06353	4.91841	5.15275	4.97761	4.64491	4.92476
1	euxassay_001673_14.jpg	NM_011599	21885	Tle1	C230057C06Rik|Estm14|Grg1|Tle4l	7557				1	5.89129	6.02678	6.73002	6.51586	5.7661	5.2829	5.83624	5.31063	5.52979	5.76669	6.10198	6.34102	6.48648	6.42027	6.80333	6.61453	6.73643	6.43025	6.68944	6.75064	5.44549	6.2386	6.33468	6.28867	6.37348	5.82157	5.47318	6.32831	5.88044	6.04922	6.51165	6.30376	6.70443	6.24072	6.84534	6.45009	6.95825	6.45376	6.13589
1	euxassay_004905_11.jpg	NM_027415	70397	Tmem70	1110020A09Rik|2210416J16Rik	7557|7569				1	6.16758	6.0247	5.76242	5.4335	6.01184	6.16177	5.8445	5.57808	5.96693	5.67304	5.94172	5.98792	6.19737	5.79858	6.10199	5.99422	5.80146	5.9207	6.29655	6.13087	5.51358	6.10654	5.96897	5.96333	5.9468	5.8944	5.90941	5.37907	5.52963	6.12732	5.84171	5.99685	5.96333	6.23616	5.93191	5.89534	5.99986	5.94693	5.85298
1	euxassay_009284_11.jpg	NM_134131	106869	Tnfaip8	AA987150|E130304C20Rik|ENSMUSG00000073567|Gg2-1|Gm10539|Nded|Ssc-2	7569				1	4.0734	4.19391	3.95643	4.17095	4.269	4.19216	4.14944	4.22167	4.04649	4.05616	4.20438	4.47908	4.55196	4.85419	5.02442	4.72074	4.92872	4.97939	5.03521	4.52854	3.87172	4.05487	4.17953	4.07879	3.99581	4.10169	4.11285	4.04843	4.24553	4.28389	4.62394	4.6356	4.67001	4.78145	5.05849	5.48941	4.86963	5.10488	4.47188
1	euxassay_006138_14.jpg	NM_172913	244579	Tox3	500-9|BC052044|C230068E13|CAGF9|Tnrc9	7557|7569				1	3.52415	3.88504	4.09391	3.71817	4.02431	3.91343	4.09636	5.01221	5.66333	5.66911	6.04791	6.63547	6.36881	6.56441	6.28324	6.38616	6.37622	6.50946	6.3759	5.9746	3.86632	4.23193	3.82167	3.80046	4.0531	4.50633	4.79981	4.22623	5.76852	6.35223	6.12687	5.99861	5.86976	6.18898	6.52927	6.39508	6.10763	6.08773	6.33677
1	euxassay_000218_11.jpg	NM_011627	21983	Tpbg	5T4|AW495680	7540				1	4.40592	4.08413	3.88152	3.8753	3.91985	4.04443	3.85486	3.81148	3.90922	4.07601	4.43691	4.48678	4.64159	4.70442	4.648	4.56723	4.55592	4.4302	4.49086	4.419	4.35982	3.98782	3.89082	3.79508	3.75324	3.64757	3.6783	3.64757	3.86433	4.1655	4.16933	4.28191	4.66073	4.63515	4.41882	4.5156	4.77178	4.57846	4.14774
1	euxassay_008433_11.jpg	NM_030706	80890	Trim2	KIAA0517|mKIAA0517|narf	7469				1	6.34862	6.06437	6.56808	6.36881	6.22657	6.56215	6.86572	6.90214	6.59015	7.1872	7.0423	7.11696	7.20198	7.38541	7.29286	7.39147	7.151	7.16894	7.13056	7.34214	6.55961	6.77788	6.38648	6.84635	6.26042	6.38424	6.79169	6.73964	6.69444	6.73814	6.87826	6.92254	7.13741	7.15082	7.39544	7.43874	7.41185	7.61676	7.15843
1	euxassay_019567_11.jpg	NM_027182	69716	Trip13	2410002G23Rik|D13Ertd328e	7569				1	5.072	5.11888	5.1871	4.81157	5.36433	5.08488	5.43379	5.24983	5.02143	5.3621	5.87102	6.19238	6.5111	6.73507	6.29102	6.55828	6.34159	6.4089	6.05241	5.68983	4.9968	5.16748	5.07947	4.47307	4.72157	5.23774	5.54685	5.09697	5.13722	5.45116	5.75877	6.14074	6.46829	6.35172	6.61241	6.5983	6.12966	6.32883	6.42124
1	euxassay_001281_11.jpg	NM_019797	56404	Trip4	4930558E03Rik|ASC-1|Asc1|BB191711	7569				1	5.32398	5.59001	5.46251	5.52882	5.57663	5.54517	5.77214	5.84646	5.63371	6.39622	6.27643	5.61552	6.29778	6.14804	6.35451	6.54165	6.53751	6.25811	5.76272	5.644	5.76626	5.9904	5.46554	5.29024	5.48356	5.61355	5.91872	5.86967	6.12158	6.11281	6.29165	6.18377	6.06907	5.83246	6.34823	6.26855	5.79599	6.021	6.07384
1	euxassay_011527_14.jpg	NM_008307	15547	Trmt2a	Htf9c	7569				1	5.10806	5.63734	6.04536	5.50037	5.67413	5.70563	6.06568	5.99275	6.10103	6.14208	6.27533	6.53907	6.8526	7.16336	7.0712	6.94136	6.55023	6.74463	6.35908	5.96906	5.57865	6.10047	5.81908	5.56178	5.80891	5.87244	5.64689	5.92841	5.94974	6.05355	6.37815	6.50211	6.79843	6.94005	7.04756	6.97169	6.61653	6.60175	6.29655
1	euxassay_006284_14.jpg	NM_172540	215201	Trmt2b	4732479N06Rik	7569				1	4.60298	4.62523	4.6497	4.92765	5.15971	5.30303	5.24756	5.14347	5.05752	5.94619	5.9389	6.21057	6.54142	6.2312	5.91465	6.17018	5.94463	5.58401	5.3851	5.40321	5.07775	4.79074	4.83634	5.06504	5.14045	5.05302	5.09114	4.85529	5.38433	5.63844	5.51347	6.2097	6.25616	6.33492	6.74881	6.66851	6.46582	6.21446	5.57999
1	euxassay_012323_14.jpg	NM_175113	66926	Trmt6	3300001M20Rik|AU016412|AW492787|CGI-09|mKIAA1153	7569				2	4.32169	4.63632	4.66909	4.49317	4.50633	4.56845	4.4062	4.54019	4.45191	4.71951	4.78105	4.85584	5.00474	4.87782	4.78784	4.77813	5.13893	5.15926	4.80132	4.43578	4.27159	4.47475	4.50229	4.31135	4.48399	4.47681	4.3399	4.36011	4.45818	4.5313	4.71777	5.07515	4.92343	5.18078	4.92607	4.67	4.74564	4.81562	4.65946
1	euxassay_011487_14.jpg	XM_972838	83925	Trps1	AI115454|AI447310|D15Ertd586e|MGC107472|MGC46754	7569				1	5.16112	5.08367	5.12407	5.48541	5.55355	5.51901	5.5722	5.40131	5.53869	5.73856	6.21132	6.35075	6.79422	6.90024	6.6321	6.49919	6.30161	6.33456	5.85003	5.61448	5.2325	5.15589	5.32071	5.43134	5.51551	5.33203	5.80314	5.71942	6.07689	6.6439	6.88698	6.82716	6.62405	6.79576	6.55549	6.42837	6.5203	6.7669	6.36366
1	euxassay_001225_11.jpg	NM_198311	76260	Ttc8	0610012F22Rik|AV001447|BBS8	7569				1	5.09131	5.35292	5.49179	5.40492	5.48525	5.42682	5.26949	5.71826	6.17877	6.2008	6.05412	5.92552	5.92499	5.79012	6.26265	6.10438	5.91333	5.95321	5.82334	5.77732	5.3378	5.45998	5.34176	4.98058	5.43858	5.36074	5.48047	5.97171	5.91917	5.84749	5.75197	6.16461	6.36616	5.99301	5.92235	6.37237	6.11505	6.3111	6.29812
1	euxassay_005646_11.jpg	NM_021324	57776	Ttyh1	4930459B04Rik|6330408P11Rik|tty	7569				1	3.75979	3.58915	3.682	3.60768	4.11653	3.58648	4.27396	3.67699	3.76452	4.46462	4.79421	5.55498	6.34008	6.5958	6.12771	6.35934	6.49987	6.56116	6.46691	5.74779	3.47845	3.63115	3.65934	3.64403	3.64403	3.32375	3.67197	3.81778	3.75979	4.12757	5.28833	5.55088	6.42013	5.92841	5.88946	6.32576	6.45416	5.78344	5.9088
1	euxassay_006322_11.jpg	NM_019392	22174	Tyro3	AI323366|Brt|Dtk|Etk-2|Rse|Sky|Tif	7539				1	3.65353	4.50734	4.24406	4.03226	4.17601	4.07365	4.06957	3.75539	3.97589	4.05034	4.17833	4.50801	4.42587	4.83914	4.37785	4.13185	4.52667	4.5968	4.4071	4.52783	3.78891	4.05311	4.1375	3.9368	3.86632	3.76216	3.87415	3.97249	4.0901	4.12727	3.90811	4.21907	4.42711	4.55309	4.43454	4.62198	4.53361	4.40962	5.12215
1	euxassay_010003_11.jpg	XM_196130	70790	Ubr5	4432411E13Rik|AW549941|C77315|D030042K14|Edd|Edd1|mKIAA0896	7569				1	4.82521	4.7418	5.08576	5.62656	4.96007	5.12763	5.40008	4.77633	5.22856	5.31082	5.31001	5.27566	5.68693	5.66751	5.65865	6.02197	5.92135	5.24302	5.49626	5.57369	5.42367	4.7734	5.11766	5.02141	4.76949	5.4305	5.41743	5.10452	5.55392	5.56695	5.6738	4.97391	5.31001	5.50405	5.85421	5.67569	6.05658	5.90325	5.98043
1	euxassay_006557_11.jpg	NM_011677	22256	Ung	UNG1|UNG2	7569				1	5.46942	5.40971	5.34677	5.27268	5.55829	5.47904	5.27061	5.4658	5.38333	5.47484	5.73472	6.49373	6.97709	7.39065	7.41659	6.90669	6.35961	5.62661	5.40846	4.75163	5.60405	5.50339	5.30115	5.32374	5.42571	5.40392	5.3349	5.49133	5.65679	5.83753	6.07099	5.92033	6.38361	6.63655	6.84918	7.00905	6.65798	5.8768	5.54587
1	euxassay_006525_11.jpg	NM_025641	66576	Uqcrh	2210416J04Rik|2310021J10Rik|2610041P16Rik	7469				1	6.44408	6.88552	6.45569	5.8153	5.82382	6.68513	6.56074	7.10982	6.87804	6.6703	7.01253	7.28628	7.02662	7.2712	7.12337	7.09645	6.82308	7.17354	6.92475	6.74034	6.60176	6.56837	5.9915	5.4976	6.03167	6.26425	6.29996	6.29077	7.13551	7.36741	7.00847	7.47584	6.78299	7.16299	7.00722	6.85307	7.15176	7.54642	7.45181
1	euxassay_009238_14.jpg	NM_009478	22275	Urod	AI323803|Uro-d	7569				1	4.53856	4.47201	4.98138	5.45899	6.03155	5.77055	5.35875	5.71801	5.61337	6.00112	6.20267	6.25008	6.34975	6.24918	6.23799	5.93828	6.51009	6.41454	6.26475	5.89044	4.57841	4.30713	5.48325	5.76214	5.40218	5.5061	5.49701	5.65396	5.87062	6.3899	6.14592	6.63332	6.38744	6.364	6.77597	6.71144	6.54215	5.91608	5.72488
1	euxassay_008899_14.jpg	NM_009506	22341	Vegfc	AW228853|VEGF-C	7569				1	4.49172	4.48935	4.31105	4.74286	4.37683	4.45565	4.21793	4.24777	4.79672	4.26733	4.85327	5.38459	5.54997	5.94897	5.47747	5.45572	5.35422	5.60535	5.47266	5.61792	4.30063	4.44955	3.95868	4.35741	4.31911	4.63193	4.66496	4.67126	4.52343	4.67754	4.74285	4.92009	5.15117	4.83653	4.88887	5.9064	5.80635	5.5089	5.64219
1	euxassay_004356_14.jpg	NM_145967	211739	Vstm2a	9330184N17Rik|BC027127|MGC38877|Vstm2	7557				1	3.52192	3.58562	3.41578	3.46742	5.43512	3.3803	3.65301	3.88046	4.44588	4.05455	4.34064	4.50214	4.15515	3.93807	3.58696	3.80219	4.13157	3.92757	3.98943	3.73395	3.64021	3.70105	3.44404	3.43517	3.54363	3.82499	3.65979	3.61339	4.33747	4.3501	4.04487	4.23223	4.25591	3.90635	4.16054	4.58462	4.12973	4.19245	4.25423
1	euxassay_000832_11.jpg	NM_178398	74781	Wipi2	1110018O08Rik|2510001I10Rik	7569				1	5.74332	6.01376	6.15812	6.44206	5.75998	6.16395	6.39902	6.42051	6.62469	6.54109	6.51223	6.78394	6.30382	6.63585	6.80738	6.74075	6.95034	6.94449	6.67677	6.75825	5.85831	5.96532	6.0587	5.84387	5.64296	6.3024	6.31775	6.14278	6.13322	6.54967	6.425	6.51643	6.73082	6.63891	6.52028	6.80021	6.19808	6.15205	6.30888
1	euxassay_007047_11.jpg	NM_177618	216881	Wscd1	KIAA0523|MGC55022|mKIAA0523	7469				1	6.5217	5.79277	6.08887	5.45918	5.62967	5.60902	5.43406	6.02014	6.04301	6.98375	7.04086	6.94308	6.97931	7.11289	7.14892	6.79624	6.80511	7.18039	7.01201	6.43265	5.68228	6.02026	6.28892	6.59952	5.68004	5.46463	5.3984	6.03162	6.03488	6.48965	7.0795	7.31432	7.19359	7.25941	7.42091	7.37562	7.07078	7.02064	7.01528
1	euxassay_000592_11.jpg	NM_133784	97064	Wwtr1	2310058J06Rik|2610021I22Rik|C78399|Taz	7569				1	5.41395	4.68209	4.55488	4.47183	4.50751	4.6452	4.76893	4.6685	4.69453	5.09862	4.95356	5.39057	5.4351	5.432	5.67935	5.57045	5.67643	5.74678	5.43843	5.58053	4.98511	4.64733	4.83781	4.991	4.55942	4.8275	4.5028	4.6569	4.76303	5.3466	5.27251	5.34922	5.66194	5.44727	5.26168	5.43473	5.61692	5.56165	6.03776
1	euxassay_003500_11.jpg	NM_010247	14375	Xrcc6	70kDa|G22p1|Ku70	7569				1	4.78726	4.89678	5.59665	5.52674	5.18989	5.10487	5.14981	5.10393	5.60984	5.19427	5.28505	5.20648	5.34622	5.70387	5.592	5.58601	5.7451	5.33276	5.46856	5.62356	4.22765	4.63063	5.10595	4.95737	5.28381	5.4237	5.28915	4.99354	5.11693	5.203	5.3851	5.57462	5.62421	6.09103	5.83265	5.71123	5.38587	5.41471	5.36112
1	euxassay_011111_11.jpg	XM_991644	73884	Zdbf2	4930431J08Rik|9330107J05Rik	7557				2	3.98731	4.36429	4.62928	4.65916	4.55098	4.37122	4.3478	4.16584	4.27041	4.17221	4.38334	4.59428	5.12062	5.05738	4.8821	4.82991	5.09539	5.17614	5.05875	5.12193	4.52174	4.85307	4.67863	4.28325	4.38266	4.29044	4.10726	4.28222	4.2834	4.43189	4.75471	5.20064	4.70378	4.95109	4.74621	4.75132	4.91055	4.85307	5.1698
1	euxassay_011111_14.jpg	XM_991644	73884	Zdbf2	4930431J08Rik|9330107J05Rik	7557				2	4.58271	4.49585	4.52956	4.77881	4.61708	4.87699	4.68969	4.76354	4.86604	5.37103	5.28401	5.32937	5.52169	5.20299	5.4613	5.51048	5.65029	5.75567	5.56905	5.27824	4.99831	4.93579	4.63912	4.58137	4.71432	4.50435	4.85279	4.79159	4.7788	5.00231	5.32937	5.7891	5.54041	5.51136	5.26162	5.1722	5.25744	5.6172	5.28134
1	euxassay_007310_14.jpg	NM_007564	12192	Zfp36l1	AW742437|AW743212|Berg36|Brf1|D530020L18Rik|ERF1|TIS11b|cMG1	7557|7569				1	5.4179	4.30298	4.07785	4.30658	3.78279	4.27473	4.33333	4.32802	4.31913	4.37599	5.81207	5.29682	6.52101	6.92503	6.66263	6.71469	6.84136	6.8711	6.52407	6.47783	5.96731	5.28716	4.56166	4.1418	3.72065	4.2912	4.48817	4.61642	4.84494	4.30568	4.80344	5.29325	6.46087	6.65649	6.55764	6.26791	7.14102	6.81882	6.71831
1	euxassay_000068_11.jpg	NM_133817	98403	Zfp451	4930515K21Rik|4933435G09Rik|AI596398|COASTER|Kiaa0576-hp|Znf451|mKIAA1702	7569				1	5.81931	5.73634	5.77667	6.34339	5.9042	5.75902	5.55933	5.77257	5.98892	6.38427	6.21117	6.49682	6.44035	6.16321	6.2496	6.20662	6.51997	6.40456	6.60641	6.30468	5.982	5.68086	5.88271	5.88452	5.72295	5.83904	5.96961	5.30902	5.69548	6.10012	6.57288	6.48327	6.3175	6.27549	6.10479	6.38004	6.25926	6.662	6.79151
1	euxassay_019569_11.jpg	NM_183033	329003	Zfp516	C330029B10Rik|D230016L03|Zfp26l|Znf516|mKIAA0222	7569				1	5.72003	5.96296	5.97975	5.9732	6.25897	6.00493	6.20427	6.193	6.03533	5.91297	6.46811	6.25728	6.50506	6.34106	6.55365	6.67731	6.38552	6.54194	6.35517	6.18934	5.81013	5.96809	6.20877	6.23028	5.87712	5.95264	5.9143	5.88521	6.04507	5.99987	6.47173	6.32049	6.42368	6.49887	6.40709	6.3836	6.20246	6.20753	6.47504
1	euxassay_006176_11.jpg	NM_172817	239546	Zfp647	6030449J21|Es492|Znf250	7536				1	4.81751	4.78008	4.46511	4.4554	4.44071	4.51737	5.09192	5.2624	5.31918	5.594	5.08233	4.46462	4.68128	5.32399	5.69276	4.64715	5.1471	5.07379	5.32638	4.92871	4.64352	4.97701	4.52319	4.60451	4.39699	4.54624	4.73765	4.39826	4.41213	5.12445	5.64849	5.15627	5.68166	6.12342	5.10905	4.93081	5.31516	5.88783	5.45035
1	euxassay_010335_14.jpg	XM_355639	269704	Zfp664	AW060232|D930038J03Rik|ZFOC1|Znf664	7569				1	5.47537	5.14088	4.77994	4.94143	5.11071	4.79569	5.14736	5.06766	5.06697	4.98378	5.28861	5.49107	5.21427	4.90215	5.33303	5.64742	5.96906	5.44827	5.51113	5.13741	5.11732	4.96068	5.11005	5.06081	4.83393	5.12391	4.87743	5.49166	5.01469	4.91372	5.23995	5.30424	5.69822	5.44704	5.49048	5.40289	5.0817	5.35735	5.30424
1	euxassay_019216_11.jpg	MIMAT0000527	na	mmu-miR-16		7569			miRNA	1	5.23037	4.89812	5.19361	5.0413	5.21304	4.90826	5.17931	5.12062	5.14671	4.93994	5.29989	5.24841	5.17931	5.95412	5.4728	5.37078	5.35296	5.77167	5.002	5.36635	5.04798	5.07319	5.15477	5.01551	5.06064	5.1285	5.5398	5.1698	5.15702	5.70869	5.47383	5.40955	5.56807	5.61881	5.8814	5.29173	5.34115	5.99885	4.83072
2	euxassay_005109_14.jpg	NM_025411	66193	1110049F12Rik	AA408179|Pithd1|RP23-161N17.10|Trp26	7469				1	4.34273	4.61436	4.51036	4.41339	4.49622	4.50566	4.54396	4.96679	5.3403	5.22288	5.34425	5.44447	5.52047	5.34858	5.22374	5.14257	4.96406	4.6497	4.51036	4.30997	4.13032	4.41839	4.43454	4.55423	4.41589	4.54167	4.94701	5.11677	5.32172	5.43659	5.28655	5.20995	5.27928	5.42296	5.15522	5.10393	5.01749	4.82507	4.55605
2	euxassay_006178_11.jpg	NM_026883	68948	1500011H22Rik	-	7469				1	5.51595	5.89028	5.56248	5.5715	5.46846	5.16615	5.15869	5.5322	6.08231	5.9962	6.21497	5.84173	5.75949	6.12918	6.48176	5.93429	6.12229	5.46798	5.58414	5.8118	5.46726	5.42497	5.71471	5.74392	5.53681	5.36828	5.44535	5.59479	5.95252	5.7003	6.21584	5.99084	5.84508	6.03795	6.43324	5.81008	6.07361	5.47015	5.95201
2	euxassay_010846_11.jpg	XM_912277	75471	1700009N14Rik	AI429145	7569				1	4.22337	4.21188	4.58238	5.00557	4.3215	4.18716	4.36494	4.39013	4.39319	4.65226	5.02932	5.23825	5.21081	4.93501	4.76148	4.38554	4.65607	4.84752	3.98098	4.5396	4.04226	4.26426	3.91166	3.8276	4.22194	3.73432	4.04226	4.3348	4.33745	4.30132	4.83259	4.91814	4.60999	4.97955	4.64672	5.25752	5.06504	4.56826	4.69001
2	euxassay_007574_14.jpg	XM_891726	75623	1700029F09Rik	3110030D08Rik|MGC118304	7569				1	4.34753	4.52611	4.53206	4.27013	4.36208	4.20084	4.29269	4.33567	4.34753	4.6977	4.99945	4.84161	5.36686	5.08851	4.76802	4.77877	5.30198	4.67801	4.58088	4.36967	4.60256	4.62377	4.49106	4.40162	4.47913	4.58756	4.3449	4.46226	4.96821	4.78071	5.02675	5.0751	5.06715	4.72321	4.95362	4.98686	4.9818	4.90719	4.63026
2	euxassay_002644_14.jpg	NM_025463	66276	1810009A15Rik	-	7569				1	4.51492	4.806	5.07783	5.35114	5.01179	4.66526	4.75941	5.69971	5.67858	5.08823	5.99086	5.93274	5.538	6.06827	5.69554	6.37391	5.82842	5.27369	5.15611	4.90107	4.87863	5.15274	4.95504	4.8819	4.84445	5.21966	5.48744	4.82309	5.44318	5.54076	6.22446	5.59946	5.21621	5.98151	5.65476	5.89929	5.54745	5.06328	5.71016
2	euxassay_006325_11.jpg	XM_128169	72301	1810041L15Rik	Kiaa1644	7557				1	4.69054	4.36234	4.36234	4.36234	4.34798	4.2559	4.48194	4.61218	4.56217	4.58795	4.51387	4.59238	4.74663	4.58461	4.56217	4.67628	4.78784	4.58683	4.56443	4.61981	4.39319	4.66729	4.47269	4.51637	4.44457	4.34009	4.60999	4.53937	4.62631	4.63601	4.67628	4.74962	4.98968	4.67732	4.70114	4.80705	4.62739	4.69187	4.56443
2	euxassay_012442_11.jpg	NM_027251	69894	2010107G23Rik	AA545165	7538				1	4.09828	4.63841	4.83561	4.86525	4.50004	4.87893	4.82905	4.79481	4.97805	5.42061	5.11155	5.46906	5.36788	5.11078	5.37691	5.24702	4.93223	5.08739	4.78186	4.71018	4.31913	4.45202	5.10302	5.02394	4.98819	4.8044	4.80822	5.0921	5.30575	5.24293	5.44657	5.84033	5.81474	5.56879	4.91852	5.11356	5.18316	5.32507	4.98279
2	euxassay_006179_14.jpg	NM_024210	67862	2310033P09Rik	MGC7354|Mmtag2	7569				1	4.16778	4.38793	4.55181	4.6164	4.7475	4.81928	4.6907	4.72848	4.90649	5.24127	5.24268	5.52504	5.36765	5.55661	5.14081	4.69132	4.83078	5.14262	4.68635	4.58447	3.29647	4.15133	4.19866	4.71633	4.76922	4.77508	4.6751	4.96839	5.32497	5.46764	5.48026	5.49099	5.17404	5.30551	5.06142	4.6751	4.73892	4.91289	4.82174
2	euxassay_013634_14.jpg	NM_001001881	72190	2510009E07Rik	AI194952	7569				1	4.85122	4.93221	5.15402	5.30357	5.48452	5.59034	5.51113	5.94194	5.64796	5.83882	5.44643	5.56686	5.56291	5.4729	5.56788	5.54814	5.32958	5.1123	5.25514	5.3619	5.09338	5.592	5.31837	5.03241	5.17107	4.85677	5.33568	5.38382	5.41045	5.60962	5.38893	5.45437	5.95104	6.03003	5.72119	5.83976	5.49818	5.06024	5.5029
2	euxassay_011064_11.jpg	XM_131720	69885	2610002D18Rik	MGC169895	7569				1	4.37205	4.25519	3.7592	4.1119	4.41401	4.22765	4.3506	3.99109	4.00114	4.28428	4.48015	4.63333	4.99304	4.66369	4.60726	4.47475	4.35648	4.30875	4.08854	4.15077	4.06239	3.98605	3.92139	4.06479	4.21476	4.24043	4.10493	4.10958	4.73915	4.29657	4.22122	4.63816	4.94311	4.42711	4.32084	4.45844	4.11653	4.14701	4.37528
2	euxassay_012294_11.jpg	NM_173750	212772	2700007P21Rik	4930448O08Rik	7569				2	3.95187	4.09944	3.87566	3.94841	3.99104	4.06633	4.101	4.35188	4.85212	4.30804	4.75751	4.43451	4.78199	4.60624	4.91758	4.60887	4.46095	4.57564	4.474	4.08754	3.77191	4.2753	4.03081	4.07428	4.15748	4.42956	4.61433	4.18712	4.48906	4.72858	4.95648	4.72555	4.4121	4.58791	4.5868	4.6552	4.29176	4.3597	4.25137
2	euxassay_002064_11.jpg	NM_026515	68026	2810417H13Rik	AA409629|MGC29306|Ns5apt9|Ns5atp9|Paf|mKIAA0101|p15(PAF)	7569				2	6.41012	6.17935	6.06051	6.17966	6.21831	6.10011	6.20347	6.69707	6.6015	7.3761	7.01242	7.33088	7.25059	6.94575	7.17232	6.80924	6.90954	6.96534	6.74792	6.48289	6.12984	6.07111	6.3115	6.42459	5.89259	6.32671	6.25655	6.0971	6.78815	6.57436	6.85239	6.94004	7.01366	7.24819	7.12907	7.1023	6.42654	6.68622	6.8059
2	euxassay_015843_14.jpg	AK038597	73100	2900092D14Rik	-	7569				1	4.43804	4.39043	4.3866	4.48866	4.5488	5.00226	5.4376	5.64595	5.67322	5.59313	5.66755	5.70306	5.43315	5.20099	5.3841	5.29218	5.2036	5.54381	5.31813	5.3044	4.3866	4.40058	4.33193	4.31458	4.39042	4.55404	4.94686	5.56282	5.6569	5.78549	5.77528	5.76893	6.10174	5.93926	5.30818	5.17016	5.0495	5.19663	5.18345
2	euxassay_012482_11.jpg	XM_485308	71643	4930422G04Rik	AI448607	7569				1	4.84891	4.85354	4.69755	4.92212	4.87646	4.91168	5.03121	5.50497	5.73666	6.08675	5.68338	5.75161	5.83822	6.07871	5.64096	5.39345	5.27674	5.33984	5.00449	5.19682	4.52494	4.91682	5.02334	4.64085	4.5261	4.51586	5.05455	5.19157	5.60057	5.956	6.40769	5.91833	5.78223	6.04317	6.22646	5.91302	5.49291	5.18982	5.18982
2	euxassay_004687_14.jpg	NM_173790	77011	5730590G19Rik	BC028450|Lrrk1|Ticrr	7569				1	5.22431	5.16299	5.84813	5.71856	5.5577	5.14891	5.60655	5.99577	6.55717	6.93666	6.96362	7.26002	6.79082	6.85676	6.72597	6.28522	5.98872	5.90719	6.4145	6.41412	5.28929	5.13437	5.44459	5.47314	5.26518	5.89243	6.9595	6.97658	7.3138	7.21843	7.03283	6.94005	6.87462	6.88741	6.55478	6.4145	6.34245	6.25784	6.71472
2	euxassay_013928_11.jpg	BC066100	103012	6720401G13Rik	5830467J12Rik|AW048145	7569				1	5.19008	5.12135	5.26306	5.64686	5.70076	5.80096	6.24428	6.06554	6.45415	6.68977	6.72354	6.47352	6.56919	6.67938	6.18713	6.40707	6.59981	6.25551	5.89779	5.50287	5.18001	5.35022	5.47027	5.06842	5.15709	5.52997	5.77534	6.10178	6.00152	6.19736	6.76146	6.51647	6.56919	6.5644	6.73587	6.50416	5.92399	5.9784	5.43409
2	euxassay_012253_11.jpg	NM_175265	77744	6720463M24Rik	AI317232|Bora	7569				1	3.53802	3.40382	3.40166	3.47351	3.74689	3.8537	4.33083	5.14865	5.56178	5.08012	4.76444	4.47595	4.80323	5.06663	4.10415	4.22908	4.19593	4.14248	4.1455	4.39191	3.52216	3.40166	3.32604	3.35318	3.80539	3.95906	4.88984	5.20499	5.36246	5.24298	5.13307	4.46959	4.25729	4.51737	4.68669	4.78784	4.48791	4.988	4.58238
2	euxassay_013313_11.jpg	AK038224	432971	A130088B03Rik	-	7540				1	5.03846	5.31435	5.20778	5.37419	5.51347	5.11677	5.27072	5.27072	5.2617	5.73781	5.57865	5.4117	5.86839	5.36735	5.82362	5.6828	5.43338	5.38817	5.60392	5.35016	4.97021	4.55195	4.80514	5.39846	5.41045	5.17191	5.55384	5.49404	5.7445	5.56923	5.58668	5.93471	5.49936	5.46057	5.20821	5.22717	5.24503	5.26267	5.70448
2	euxassay_002027_11.jpg	NM_145930	106064	AW549877	AI195826	7469				1	4.3244	4.5981	4.58257	4.39213	4.52919	4.4976	4.73581	4.6501	4.85876	4.6025	5.26599	5.13557	5.18046	4.89172	4.45341	5.01483	5.14194	4.61912	5.33856	4.8378	4.41592	4.67541	4.77663	4.41985	4.81102	4.47255	4.37806	4.89603	4.74978	4.67854	5.175	5.25833	4.56462	4.99486	4.75573	4.92094	5.14511	4.94802	4.25892
2	euxassay_005036_14.jpg	NM_030210	78894	Aacs	2210408B16Rik|SUR5	7469				1	4.0641	4.05586	4.3478	4.51537	4.55877	4.79816	4.89293	4.97313	5.71786	5.44731	5.70694	5.42349	5.4515	4.73163	4.36012	4.70627	4.20466	4.2003	3.90276	3.94327	3.76047	3.98387	4.14399	4.28927	4.28575	4.57038	4.6103	4.71951	5.26875	5.53091	5.46504	5.56323	5.42296	5.943	5.67637	5.94931	4.93571	4.7185	4.47715
2	euxassay_001188_11.jpg	NM_011994	26874	Abcd2	ABC39|ALDL1|ALDR|ALDRP	7569				1	4.87666	5.1994	5.51297	5.72091	6.35638	6.33043	6.42034	6.81242	7.32376	7.04589	6.91542	7.04791	7.23918	6.62243	7.08183	7.42819	7.23617	7.21061	6.99318	6.27385	4.95332	5.21243	5.73903	5.45359	6.15965	6.12922	6.77443	6.93164	7.33316	6.85761	6.74132	6.72651	6.54787	7.06657	7.18458	6.97821	6.84279	6.51319	6.8257
2	euxassay_010142_11.jpg	NM_153151	224530	Acat3	ACTL	7469				1	4.45296	4.6089	4.97276	4.94006	4.65098	4.84844	4.84473	5.1075	5.32772	5.81292	6.11535	5.58645	5.54814	5.41672	5.30559	4.67314	5.27556	5.6754	4.91814	4.84305	4.33215	4.77618	4.85861	4.34035	4.75793	4.30024	4.56013	4.81029	4.73645	5.76056	5.18901	5.43412	5.70817	4.78726	4.6962	5.18901	5.32958	4.93081	5.72281
2	euxassay_012736_14.jpg	NM_001034013	11418	Accn1	ACIC2|ASIC2|BNC1|BNaC1a|Mdeg	7557				1	5.15026	4.30064	3.81009	4.0136	3.85093	3.97334	4.26669	4.1836	4.35788	4.95109	5.14671	5.32009	4.57519	4.62801	4.71516	4.46752	4.38773	4.37343	4.18359	4.05173	4.32983	4.12344	4.11768	4.26252	4.34864	4.81585	4.23937	4.53427	4.98547	4.84911	4.89985	4.90674	4.84274	5.18561	4.72731	4.78161	4.85069	4.6932	4.20238
2	euxassay_003011_11.jpg	NM_021330	11431	Acp1	4632432E04Rik|AI427468|Acp-1|LMW-PTP|MGC103115|MGC132904	7569				1	5.95759	5.78227	6.19446	6.15631	6.08961	6.24975	6.52463	6.4925	6.50447	6.87599	6.8777	6.79783	6.55861	6.62792	6.73939	6.76172	6.84669	6.69676	6.91138	6.43623	5.76822	5.78227	6.0678	6.27242	6.0187	6.09244	6.26952	6.43854	6.23226	6.82742	6.75802	7.01044	7.33153	7.33277	7.01354	7.15944	6.94851	6.87018	6.80142
2	euxassay_006286_14.jpg	NM_207625	50790	Acsl4	9430020A05Rik|ACS4|AU018108|Facl4|Lacs4	7536				1	5.01055	5.24237	5.42545	5.62702	5.63565	5.87614	5.25192	5.29814	5.88747	5.92225	5.98855	5.94194	6.56498	6.23475	5.87341	5.56968	5.51054	5.69976	5.41859	5.52047	5.20001	5.53955	5.68841	5.48034	5.31301	5.16523	5.33898	5.32439	5.29338	5.72625	5.41108	5.52105	5.66911	5.40163	5.75819	5.55555	5.29814	5.56799	5.58812
2	euxassay_013581_11.jpg	NM_019673	56456	Actl6a	2810432C06Rik|AI851094|ARP4|Actl6|Baf53a|C79802	7569				1	4.91194	4.89498	5.31837	5.32372	5.33104	5.21858	5.3729	5.78509	6.38008	6.36978	6.21834	6.22764	5.69668	5.83133	6.15376	5.55952	5.36385	5.85091	5.18446	5.21254	4.62523	4.91283	5.23995	5.20561	5.45254	5.36903	5.38574	5.67697	5.67016	5.68478	5.80386	5.97587	5.85922	5.72423	5.64689	5.60633	5.72473	5.31233	5.88973
2	euxassay_007602_14.jpg	NM_011780	23792	Adam23	AW046396|MDC3	7557				1	4.88963	5.38933	5.28336	5.26024	5.53621	5.65322	5.44663	5.87584	5.53868	5.45135	6.23466	5.83028	5.61004	5.63498	5.78449	6.00685	5.68206	5.51917	5.32822	5.24683	4.79216	4.84809	5.57947	5.31936	5.58902	5.36629	5.36434	5.16803	5.62039	5.61277	5.99223	5.69088	5.83918	5.84987	6.12945	5.87695	5.69346	5.47059	5.52091
2	euxassay_001699_11.jpg	NM_134079	11534	Adk	2310026J05Rik|5033405D03Rik|AI255373|AI987814|Ak|MGC6593	7569				1	5.37964	5.3267	5.19943	4.8864	4.77079	4.92649	5.16633	5.94302	6.57271	6.56511	6.27652	6.07965	5.98538	5.91007	5.88317	5.76728	5.73152	5.74951	5.50318	5.40445	4.86181	5.2903	5.49254	5.39876	5.52075	5.43812	5.53637	5.87363	6.10199	6.40975	6.44606	5.88452	5.70565	5.78046	5.81077	5.8502	5.8502	5.86403	5.875
2	euxassay_005152_11.jpg	NM_178162	231801	Agfg2	A630095P14Rik|Hrbl|MGC61203|MGC7148|RABR	7569				1	4.16839	4.30789	4.42338	4.49317	4.57231	4.73163	4.50834	4.60655	4.65098	4.95847	4.95626	5.08057	5.30047	5.17043	5.00128	4.7841	4.83714	4.68253	4.68357	4.3348	3.99397	3.96053	4.27396	4.55585	4.54608	4.67359	4.67628	4.64184	5.04495	4.97458	5.08395	5.0994	5.28939	4.93096	5.01339	4.87899	4.83634	4.71864	4.58477
2	euxassay_003106_14.jpg	NM_021299	56248	Ak3	AA407498|AI506714|AK-3|Ak3l|Ak3l1|Akl3l	7569				2	6.51327	6.52941	6.06517	5.94607	5.73656	5.69616	6.01027	6.46509	6.44085	6.86778	6.45918	6.81999	6.52202	6.43808	6.92298	6.78988	6.4996	6.58765	6.63399	6.73914	6.48277	6.0882	5.90452	5.4237	5.79907	5.87819	6.61612	6.83796	6.73111	7.03356	6.65323	6.61039	6.49428	6.45142	7.05602	6.94787	6.90068	5.96415	6.32165
2	euxassay_019530_11.jpg	NM_001045514	100182	Akna	AI597013|MGC116630|mKIAA1968	7569				1	5.34321	5.77703	6.04726	5.90069	5.64764	5.74401	5.69843	5.87997	6.30854	6.46037	6.53775	6.22422	6.28372	6.39108	6.3712	6.27926	6.23561	6.24796	5.97732	5.81245	4.89625	5.61966	6.02733	5.898	5.7209	6.05331	6.05893	6.09612	6.10624	6.19898	6.5201	6.1968	6.08357	6.10701	6.27671	6.21115	5.87661	5.97724	6.15106
2	euxassay_009095_11.jpg	NM_027406	107747	Aldh1l1	1810048F20Rik|FDH|Fthfd|Neut2	7569				1	5.3296	4.20151	4.09297	4.0961	4.54491	4.73948	4.53688	4.75441	4.60433	4.85937	5.41373	5.09804	5.1231	5.62076	5.21573	4.9658	5.07064	5.01024	4.76349	4.70446	3.75393	4.08039	4.17956	4.28747	4.62613	4.56536	4.51367	4.67819	4.58887	4.48413	5.46641	4.69582	5.62661	4.42292	4.93678	4.65569	5.02312	5.04173	4.68963
2	euxassay_012513_14.jpg	NM_134042	104776	Aldh6a1	1110038I05Rik|AI314632|MGC37325|Mmsdh	7569				1	4.68817	4.34592	5.25053	4.53342	4.45519	4.49838	4.73467	5.11464	5.16018	5.36387	5.21213	5.31638	5.34131	5.71002	5.81768	5.23253	4.98676	4.7165	4.34079	4.15533	4.47839	4.71039	4.61767	4.89627	4.89734	4.65674	4.78787	5.1385	5.14938	5.20346	5.16376	5.29857	5.29368	5.14032	5.019	4.93241	4.8625	4.71405	4.44345
2	euxassay_011311_11.jpg	NM_007444	100041585	Amd2	AdoMetDC|Amd1|Amd3|ENSMUSG00000063953	7569				1	4.60166	4.97938	5.09552	5.03422	5.40264	4.97123	4.66999	4.6497	4.86742	5.20213	5.95862	5.57125	5.77468	5.41396	5.5672	5.50432	5.19339	5.28751	5.48726	5.02662	4.73263	5.2845	5.29338	5.1412	4.97735	4.95891	4.88489	4.8729	5.3087	5.81282	5.94203	5.61377	5.73611	5.45401	5.46711	5.48869	5.49012	5.90291	5.6455
2	euxassay_001475_14.jpg	NM_146033	217473	Ankmy2	AI035571|MGC18754|ZMYND20	7469				1	6.22049	5.672	5.8244	5.89849	5.92841	5.79979	6.34551	6.12639	6.5914	6.0742	6.03143	6.28915	6.33498	5.89069	5.92011	6.43497	6.37746	6.17906	5.80809	5.75055	5.71878	6.61673	6.14322	5.86965	5.94411	6.01554	5.82687	6.40536	6.15704	6.12064	6.47954	6.82424	6.11429	5.87853	6.27972	6.38272	6.0895	6.00091	5.95892
2	euxassay_005116_11.jpg	NM_009687	11792	Apex1	APE|Apex|HAP1|Ref-1	7469				1	5.12849	5.51447	5.89532	5.79866	5.83722	5.92162	6.13248	6.15194	6.29762	6.41869	6.5405	6.35223	6.31915	6.15639	6.46962	6.1053	6.14095	6.04952	5.2236	5.11292	5.22961	5.52047	5.68352	5.94113	5.85987	5.82151	6.06397	6.2694	6.1364	5.93216	6.09557	6.18678	6.5336	6.69701	6.36135	6.40204	6.29723	6.06596	5.53091
2	euxassay_006841_14.jpg	NM_177337	219144	Arl11	ARLTS1|C730007L20Rik	7569				1	5.37112	5.43828	5.13722	4.80442	4.83282	4.7842	5.04797	5.37885	5.76447	5.55455	5.61794	5.55369	5.47389	5.39988	5.73918	5.80445	5.60317	5.66845	5.58909	5.51098	5.39132	5.19525	5.16653	5.29048	5.16205	4.8286	5.02723	5.26881	5.28638	5.73317	5.82934	6.11776	6.14689	6.22719	5.99369	5.34079	5.60948	5.43149	5.36043
2	euxassay_001590_14.jpg	NM_024184	66929	Asf1b	1700003K02Rik|AA409591	7569				1	6.21175	6.03938	5.12671	5.26497	5.15003	5.32218	5.16071	5.19667	6.01851	6.64676	7.01053	6.62908	6.61793	6.40502	6.44184	5.75481	5.59628	5.5403	5.18814	3.62601	5.15341	5.19886	5.92893	4.73283	4.99593	5.16575	5.29283	5.24397	5.45144	6.09847	6.71109	7.1141	6.66741	7.11959	6.06564	6.24701	5.86539	5.78482	5.58809
2	euxassay_005141_14.jpg	NM_019652	56495	Asna1	1810048H22Rik|ArsA	7469				1	4.13793	4.38937	4.05839	3.87024	4.07592	4.2162	4.19914	4.41889	4.90215	4.72679	4.90857	4.76973	4.77208	4.39775	4.3886	4.90108	4.32124	4.41138	4.67753	4.38554	4.48194	4.12574	4.21476	4.21764	4.16499	4.61763	4.89139	4.70606	4.51457	4.63042	4.79767	4.74005	5.24164	4.66621	4.35922	4.67377	4.86412	4.45296	4.72437
2	euxassay_000035_11.jpg	NM_025610	66514	Asrgl1	2410004D18Rik|ALP|ALP1|AU040643|AW060375	7540				1	5.37686	5.62635	5.50734	5.90039	5.9164	5.56942	5.91534	5.5922	5.78011	5.79578	5.61068	5.37609	6.19633	6.3021	5.92434	5.85236	6.3021	5.82774	5.32981	5.54388	5.10978	5.51367	5.43285	5.50734	5.38839	5.5975	5.44394	5.62114	5.32421	5.92961	6.46991	5.92064	5.81754	5.92064	5.71538	5.74706	5.86933	5.43508	5.68999
2	euxassay_012771_14.jpg	NM_027435	70472	Atad2	2610509G12Rik|MGC38189	7569				1	3.74689	3.84735	4.31135	3.98965	4.62708	4.8657	4.46441	4.78908	5.28117	6.23242	6.20319	6.65089	5.97502	5.48051	5.14671	5.12915	4.66188	4.60451	4.86045	4.70933	3.89065	3.87708	4.13489	4.20486	3.7756	4.0682	4.50633	4.97313	6.24545	5.67682	5.95042	5.79783	6.00635	6.09411	5.30453	5.44993	5.03939	4.65553	4.75387
2	euxassay_013782_11.jpg	NM_001029856	237877	Atad5	C130052G03Rik|FLJ12735|FRAG1|Gm17	7569				1	4.08539	3.95709	4.32417	4.44685	4.13489	4.2545	4.5033	4.57903	5.1298	5.0064	5.27763	5.05141	5.43844	5.64369	5.088	4.89946	4.54396	4.40962	4.64458	4.36753	4.07908	4.19489	4.15817	4.42445	4.25849	4.2525	4.38444	4.62415	4.96252	5.11523	5.29611	5.15926	5.15252	5.35669	5.2463	5.28792	4.7124	4.68357	4.59681
2	euxassay_019493_11.jpg	NM_030693	107503	Atf5	AFTA|Atf7|Atfx|MGC102397|ODA-10	7569		mouseTF		1	5.60954	5.63879	6.47109	6.49006	6.38136	6.34436	6.20137	6.33819	6.45212	6.76277	6.58857	6.77478	6.66691	6.43369	6.4219	6.55628	6.51452	6.54001	6.5523	6.31589	5.16736	6.27508	6.10419	6.55823	6.15296	6.07833	6.4563	6.29912	6.65412	6.71206	6.48917	6.55969	6.65423	6.7608	6.63393	6.67294	6.69477	6.57462	6.07641
2	euxassay_001705_11.jpg	NM_146091	109168	Atl3	4633402C03Rik|5730596K20Rik|AI465397|AW228836|MGC28761	7569				2	5.1615	5.41359	5.4117	5.47974	5.4117	5.37741	5.64101	5.88838	5.99023	5.97375	6.04588	6.37815	6.0983	6.21726	6.25027	6.00529	5.84162	5.78169	5.54814	5.09271	5.15252	5.52918	5.58367	5.39846	5.29202	5.21858	5.64262	6.02511	6.04346	6.02511	6.02757	6.06037	6.11227	6.07471	5.85691	5.94281	6.05194	5.90452	5.68218
2	euxassay_018926_11.jpg	NM_015804	50770	Atp11a	4930558F19Rik|AU040868|Atpc1h|Ih	7569				1	6.0259	6.58861	6.44282	6.64175	6.15017	5.96754	6.41773	6.93131	6.94569	6.67468	6.61828	7.05912	7.0696	7.04391	6.87347	6.7253	6.77494	6.6697	6.46779	6.4099	6.01912	6.59608	6.295	5.92134	6.33178	6.02159	6.04666	6.12167	6.63491	6.94503	7.02444	7.09386	7.1035	6.76146	6.85409	6.861	6.37733	6.60421	6.59539
2	euxassay_004878_11.jpg	NM_011497	20878	Aurka	AIRK1|AU019385|AW539821|Ark1|Aurora-A|Ayk1|IAK|IAK1|Stk6	7569				1	5.32572	5.18886	5.56008	6.1192	5.78315	5.75473	5.65327	6.02141	6.29076	6.47744	6.76418	6.89847	7.17516	6.89578	6.86695	6.7132	6.7595	6.54658	6.69041	6.86723	6.12496	5.53206	5.56461	5.52338	5.80051	5.58479	6.07193	5.9665	6.13221	6.53013	6.95197	6.93417	7.13797	7.07497	6.49561	6.22371	6.1162	6.05339	6.40847
2	euxassay_012447_11.jpg	AK083460	320063	B230354K17Rik	-	7569				1	4.6932	4.76317	5.16597	5.47691	5.15894	5.23266	5.22655	4.96728	5.28469	5.23448	5.31262	5.5958	5.67547	5.50694	5.51497	5.19814	5.26934	5.19064	4.89139	5.01469	4.10842	4.96059	4.76517	5.04373	5.26882	5.12866	5.00993	5.34277	5.75745	5.72437	5.60288	5.51146	5.5882	5.52296	5.42135	5.23327	5.246	5.30395	5.49784
2	euxassay_005181_14.jpg	NM_207264	399568	BC052040	MGC62402	7469|7569				1	3.8276	3.97589	3.99612	4.2305	4.48552	4.30538	4.26287	4.47595	4.77326	5.70541	5.87159	6.1485	5.84906	5.77936	5.14257	4.96303	5.35251	5.18284	5.13529	5.17399	4.02102	4.10416	3.80293	3.88116	4.17538	4.32417	4.29996	4.53822	4.94961	5.38957	6.25728	6.20355	5.48213	5.39466	5.30829	5.47674	5.72423	5.07775	4.95564
2	euxassay_001866_11.jpg	NM_027444	70508	Bbx	5530401J07Rik|5730403O13Rik	7569		mouseTF		1	4.41147	4.25739	4.29217	4.49631	4.65615	4.758	5.46715	5.32163	5.06812	5.00363	5.47294	5.43417	5.66336	6.09105	5.845	5.43268	5.05275	5.51281	5.73132	5.78928	4.47339	4.41072	4.37124	4.42322	4.35697	4.68136	4.81739	5.55831	5.6621	6.20756	5.74094	6.12361	6.00382	5.57869	5.56521	6.17554	6.25408	5.89165	5.02052
2	euxassay_014034_11.jpg	XM_981450	380785	Begain	BM948371|Gm897	7557				1	4.47114	4.42711	4.75853	4.64885	4.60341	4.55877	4.63171	4.62847	4.64779	4.62955	4.97531	4.95478	4.97361	4.95478	5.02867	5.01848	4.85861	4.4891	4.57635	4.03086	4.3348	4.29725	4.64138	4.67104	4.63279	4.48314	4.44071	4.72052	4.7917	4.67837	4.78687	4.62415	4.85953	4.81087	4.71138	4.72316	4.95375	4.7603	4.45003
2	euxassay_013954_14.jpg	NM_007465	11797	Birc2	AW146227|Api1|Api2|Birc3|HIAP1|HIAP2|IAP1|IAP2|MIAP1|MIAP2|MIHB|MIHC|RNF48|cIAP1|cIAP2|mcIAP1	7569				1	4.8776	4.98996	4.52954	4.84769	4.73955	4.96524	5.08004	5.24129	5.04371	5.04971	5.21492	5.6431	5.24341	4.95297	5.16367	4.98876	5.12361	5.03594	4.80218	4.34654	4.56092	4.77344	4.47806	4.60393	4.64478	4.71535	5.1247	4.75829	5.12339	5.18008	5.12929	5.29594	5.29536	5.25185	5.39396	4.90741	4.92158	4.5381	4.6197
2	euxassay_000541_11.jpg	NM_026512	68021	Bphl	2010012D11Rik|5730533B08Rik|AI115341	7569				1	5.01477	5.25702	5.46874	5.13916	5.28278	5.47308	5.46294	5.99137	5.87437	5.79344	5.58718	5.81139	5.80424	5.67215	5.8756	5.7738	5.6994	6.04722	5.83335	5.66031	4.92791	5.51505	5.22567	5.20669	5.25702	5.43431	5.49954	5.62762	5.70341	5.67419	5.68623	5.5628	5.75982	5.37277	5.53541	5.4463	5.56025	5.41095	5.45729
2	euxassay_019615_11.jpg	NM_0010810011	12190	Brca2	AI256696|AW045498|Fancd1|RAB163	7569				1	4.04619	4.22214	4.47715	4.59681	4.39953	4.19009	4.5033	4.26008	4.29044	4.68149	4.42959	5.90318	5.58645	5.23144	5.02293	4.65735	4.68357	4.42462	4.4891	4.86321	4.38773	4.17094	4.48791	4.51035	4.52087	4.38937	4.36234	4.41088	4.38937	5.00474	4.76148	5.261	4.73665	4.86412	4.72356	4.7516	4.52319	4.83447	4.70319
2	euxassay_013686_11.jpg	NM_178309	237911	Brip1	3110009N10Rik|8030460J03Rik|Bach1|FACJ|Fancj|OF	7569				1	3.96909	3.93106	3.86475	3.97079	3.93979	4.07718	4.14217	4.29371	5.33832	5.72766	6.19839	6.16706	6.09056	5.76292	5.99978	5.10859	4.60297	4.25562	4.33083	5.35487	4.18716	4.28907	4.14248	4.22908	3.94847	4.01938	4.20175	4.32817	5.6803	5.98569	5.95035	5.67718	5.97757	5.4613	5.29488	5.49724	4.89462	4.32604	5.15522
2	euxassay_011624_11.jpg	NM_080458	140475	Bsnd	MGC47291	7557				1	5.36812	6.10786	5.74031	5.8304	5.77877	5.81054	5.67357	5.82334	5.99023	5.96928	5.98455	6.03859	6.07768	6.0895	6.11285	6.1381	6.06636	5.98138	5.82192	5.66648	5.81795	6.19533	5.91996	5.97451	5.61639	5.70448	5.64165	5.66396	5.92313	5.99715	5.86174	5.9896	6.0337	5.94607	5.88091	5.88023	5.95384	5.98771	5.84511
2	euxassay_019495_14.jpg	NM_145455	218490	Btf3	1700054E11Rik	7569				1	5.38784	5.39765	6.28289	6.19847	6.31982	6.3701	6.43607	6.44346	6.72051	6.58265	7.11946	6.62468	6.94938	6.9595	6.72759	6.65495	7.07021	6.54595	6.30941	6.54623	4.59048	5.79123	5.84255	5.9665	6.13412	6.65627	6.24289	6.48879	6.69676	6.47534	6.6903	6.96657	6.65521	6.96636	6.89205	6.96956	6.75283	7.00847	6.4663
2	euxassay_001714_14.jpg	NM_030888	81799	C1qtnf3	2310005P21Rik|CORS-26|CTRP3|Corcs|Cors	7569				2	4.70742	4.87884	4.33233	4.22926	4.38186	4.60356	5.17216	5.17571	5.45104	5.99725	5.58196	7.05757	6.58012	6.79254	6.36749	5.87584	4.83963	4.71456	4.77201	5.70997	5.16458	4.67432	4.3096	4.4725	4.09969	4.51519	5.04019	5.80965	5.61733	5.65313	5.74924	5.66392	5.85605	6.26783	4.60685	4.47899	4.94851	4.6121	5.285
2	euxassay_014124_14.jpg	AK021199	78703	C330013J21Rik	-	7469				1	5.3884	5.78724	6.08003	5.82449	6.27513	6.3863	6.16328	6.35922	6.35987	6.67951	6.44083	6.77115	6.54893	6.77531	6.37057	6.44298	6.32364	6.14603	6.6027	6.17257	5.28343	5.33001	6.08908	5.99671	6.49337	6.43652	6.36701	6.45003	6.39013	6.65507	6.85155	6.56171	6.83198	6.1377	5.98241	6.65241	6.41852	6.52824	6.24769
2	euxassay_002068_11.jpg	NM_011274	19777	C80913	NNX3|Rmp	7469				1	3.81207	4.28304	4.61414	4.30429	4.37243	4.60626	4.41213	4.79593	4.79593	4.7514	4.84137	5.25471	5.40074	5.44649	5.23718	4.94102	4.90803	4.47906	4.38438	4.20479	4.19651	3.95536	4.36623	4.41664	4.27974	4.40306	5.02489	5.15386	5.11368	4.85916	5.25555	5.14302	5.32758	5.59316	5.93523	5.3826	4.8228	4.34942	4.15841
2	euxassay_015807_11.jpg	XM_001002768	76464	Casc5	2310043D08Rik|5730505K17Rik|MGC91208	7569				1	2.98213	3.50057	3.54073	3.65171	3.66598	3.68947	3.65171	3.65171	3.65171	3.66914	4.03331	4.16712	4.22582	3.85845	3.77057	4.29161	3.70184	4.04619	3.83136	3.65352	3.21575	3.57476	3.53209	3.45196	3.59314	3.65171	3.64692	3.65171	3.76068	3.87844	4.23937	3.99397	3.86789	4.23558	3.91571	3.86475	3.93829	3.75708	3.7036
2	euxassay_004793_11.jpg	NM_009811	12368	Casp6	Mch2|mCASP-6	7569				1	4.94138	4.57871	4.10682	4.08242	4.50297	4.68348	4.72651	4.87264	4.14174	4.58139	5.06305	4.92529	5.24314	4.42452	4.8517	4.42004	4.58674	4.51984	4.93999	4.39739	4.12958	4.48971	4.5434	4.44257	4.58741	4.70372	4.39891	4.4973	5.28567	4.87155	4.47729	4.86386	4.6171	4.60398	4.72044	4.51984	4.35885	4.49304	4.77298
2	euxassay_019496_11.jpg	NM_172860	12396	Cbfa2t2	A430091M07|C330013D05Rik|Cbfa2t2h|MTGR1	7569				1	5.48082	6.0187	6.06349	6.80609	7.06143	6.83782	6.48456	6.63697	6.90008	6.99286	6.9322	7.2491	7.52453	7.17183	7.28778	7.43121	7.37089	6.70707	6.23716	5.76999	5.76557	5.96889	6.6237	6.69289	6.69815	6.72628	6.61391	6.89901	6.99261	7.10027	7.32784	6.97692	7.13649	7.03234	7.43585	7.23937	7.32504	7.24488	6.4081
2	euxassay_012256_11.jpg	NM_007622	12412	Cbx1	Cbx|Cbx-rs2|E430007M08Rik|HP1B|M31|MOD1	7569				2	5.247	5.21858	5.31636	5.4501	5.60194	5.72372	5.91731	6.03297	6.15181	6.17861	6.23843	6.23971	6.18656	6.10646	6.00429	5.93209	5.84274	5.64294	5.3478	5.04883	5.06902	5.07617	5.19252	5.31032	5.4319	5.582	5.74868	5.92683	6.05097	6.19577	6.23971	6.26244	6.27118	6.16661	6.09103	5.94879	5.83714	5.6828	5.39351
2	euxassay_012256_14.jpg	NM_007622	12412	Cbx1	Cbx|Cbx-rs2|E430007M08Rik|HP1B|M31|MOD1	7569				2	4.40383	4.92026	4.75912	5.05269	5.51066	5.46057	6.54829	6.06971	6.79227	6.51151	6.89712	6.30442	6.27481	6.51415	6.33313	6.59472	5.73731	5.8958	5.59284	5.38702	4.23873	4.47187	5.10207	5.36034	5.2957	5.41997	5.61377	5.51136	5.53091	5.5502	6.92298	6.41525	6.22649	6.64884	5.93156	6.09385	5.47722	6.2975	5.46639
2	euxassay_012419_14.jpg	NM_146248	240084	Cchcr1	Hcr|MGC28303	7569				1	4.88672	5.07206	5.22775	5.48023	4.9811	5.40151	5.33622	5.00957	5.11587	6.02504	6.29853	5.84293	6.00313	6.11259	5.93096	5.65626	5.27585	5.45536	5.33662	5.07365	4.43185	4.77893	5.1289	5.39391	5.10037	5.04237	4.70915	4.87584	4.76819	4.79056	5.36762	5.70736	6.01722	6.44125	5.81616	5.7586	5.7477	5.68676	5.03913
2	euxassay_008787_14.jpg	NM_177682	231874	Ccz1	AU022870|MGC56855	7470				1	5.18284	5.1885	5.0244	5.24756	5.1529	5.0067	5.24333	5.1458	5.02229	5.36279	5.3712	5.08357	6.02321	5.858	5.64228	6.3699	5.68756	6.10932	5.92725	5.08986	5.30372	5.40933	5.19164	5.15996	5.1689	5.07283	5.34035	5.14677	5.39044	5.58053	5.90602	6.17587	6.11241	6.01786	5.66457	5.58388	5.29771	5.08514	5.00088
2	euxassay_019262_11.jpg	NM_016898	53599	Cd164	A115|A24|AA589639|AW540279|MGC-24|MSSP	7569				1	5.70369	6.11329	5.88098	5.96507	6.43751	6.71585	7.09556	6.9165	7.08044	6.97395	7.24111	7.1618	7.09047	7.31897	7.16217	6.96457	6.98926	6.98521	7.19777	7.23336	4.30084	5.73512	5.71034	6.24769	6.6733	7.28529	7.05112	7.1381	7.11554	7.23048	7.20662	7.00382	7.08576	6.8238	6.83881	7.05615	7.38087	7.17532	7.32958
2	euxassay_003531_14.jpg	NM_020006	56699	Cdc42ep4	1500041M20Rik|Borg4|CEP4	7569				1	5.78629	5.95254	6.10277	6.07751	5.71331	5.83624	5.80734	6.58695	6.59062	6.82045	6.73876	6.54156	6.43517	6.57725	6.73786	6.79325	7.12262	6.3835	6.34537	6.11592	6.19098	6.1483	5.80504	5.97012	6.03071	6.0699	6.66895	6.15469	6.66232	6.52738	6.4922	6.57893	6.68369	6.51095	6.5357	6.512	6.44845	6.12789	6.28703
2	euxassay_000111_11.jpg	NM_175384	108912	Cdca2	2610311M19Rik|AI586158	7540				1	4.12146	3.87791	4.34168	4.481	4.42737	4.5327	4.87892	4.73986	5.04592	5.27639	5.25696	5.22375	5.32252	5.62335	5.33978	5.32719	5.03586	4.87255	5.25066	4.83035	4.47139	4.38452	4.48458	4.46657	4.13064	4.40485	4.52923	4.73083	4.98733	4.62762	5.23585	5.64753	5.75829	5.84404	5.35696	4.70443	4.82017	4.74086	4.83147
2	euxassay_004852_11.jpg	NM_013538	14793	Cdca3	2410005A12Rik|C8|Grcc8|Tome-1	7569				2	5.07961	4.73399	4.18591	4.23099	4.231	4.63746	4.77964	5.26305	5.96194	7.06825	7.16815	7.13158	6.7543	6.33033	6.43852	6.25845	5.90262	6.51448	6.33431	6.06227	3.72495	4.28297	4.46238	4.24966	4.27968	4.17353	4.67057	5.04053	6.86405	6.93756	6.75756	7.24624	7.11525	6.50851	6.50357	5.83347	6.08559	5.66992	5.93022
2	euxassay_004852_14.jpg	NM_013538	14793	Cdca3	2410005A12Rik|C8|Grcc8|Tome-1	7569				2	4.26449	4.6493	4.44368	4.85922	6.29048	4.90743	4.50232	5.67627	6.22502	6.28689	6.46461	6.91568	6.86639	6.34178	6.0416	5.7446	5.50241	6.27	6.24184	6.89536	4.50497	4.20381	4.42887	4.72398	4.78413	4.3787	5.0985	5.69534	6.17015	6.31786	6.68468	6.52898	6.43657	6.46354	6.72074	6.65953	6.4166	5.40633	6.05195
2	euxassay_001757_14.jpg	NM_009870	12567	Cdk4	Crk3	7569				1	4.73038	5.81423	5.82181	6.27421	6.59507	6.03768	6.84164	6.4397	5.98719	5.96255	6.34494	6.16749	6.08252	6.72501	6.30832	6.34099	6.20708	6.53526	6.24562	6.0837	5.14631	5.65474	5.64676	6.53699	5.9401	6.02624	6.12218	6.2711	6.50234	6.51554	6.81294	6.51729	6.48633	7.08066	6.52398	5.87285	5.54572	5.97024	6.60992
2	euxassay_002069_11.jpg	NM_007671	12580	Cdkn2c	C77269|INK4c|INK4d|p18|p18INK4c	7569				1	3.70472	3.81893	3.7511	3.79987	3.85076	4.0813	4.68815	4.73103	5.08044	5.2124	5.27308	5.9334	5.31126	5.0084	5.23031	4.99254	4.32738	4.32205	4.42015	4.30106	4.21678	4.15963	4.06703	4.27866	3.80561	3.87098	4.16411	4.32205	5.45949	6.62884	6.22063	5.45035	5.18916	5.01502	4.67357	4.65989	4.8264	4.42637	4.09544
2	euxassay_002385_14.jpg	NM_026014	67177	Cdt1	2610318F11Rik|AW545653|C76791|Ris2	7569				1	6.01338	5.33486	5.70135	5.04444	5.67156	5.25458	5.07669	5.20329	5.84332	6.69516	7.29229	7.12864	7.33135	6.70221	6.62427	6.71666	6.40509	5.45894	5.97803	4.49649	4.90618	5.55365	5.25817	5.10691	5.17758	5.26712	5.08346	5.16806	5.58021	6.21411	6.7498	6.78719	6.57732	6.50151	7.0952	6.1823	6.10522	5.39344	5.672
2	euxassay_003389_11.jpg	NM_021886	26886	Cenph	1700021I11Rik|2410018A12Rik|2610042E16Rik|2810046K12Rik|AU044255|CENP-H|ENP	7569				1	5.34495	5.6303	5.43663	5.19695	5.19111	5.45441	5.38706	5.48992	5.49408	5.82431	6.28566	6.34208	6.87076	6.47986	6.40774	6.1824	5.56577	5.43972	5.52528	5.31346	5.27354	5.25686	5.51818	5.63891	5.39089	5.09041	5.49408	5.45136	5.75773	6.20249	6.5544	6.80433	6.55747	6.51884	6.39668	6.01914	5.98664	5.85159	5.46341
2	euxassay_000072_11.jpg	NM_134046	52504	Cenpo	2810429O05Rik|8430427C03Rik|D12Ertd482e|MGC36863	7569				1	5.74498	6.02198	5.94523	5.7559	5.81176	5.99433	6.20889	6.31498	6.12456	6.4731	6.44431	6.42802	6.75361	6.49992	6.2898	6.13509	5.98778	6.04085	5.70272	5.58075	5.69222	5.45399	5.45032	5.57157	5.69892	5.74249	6.20586	5.88719	6.3605	6.40664	6.60904	6.71263	6.5091	6.09015	6.22784	6.18706	5.9556	6.03499	5.96999
2	euxassay_006338_11.jpg	NM_026665	74360	Cep57	3110002L15Rik|4921510P06Rik|4931428M20Rik|AI467480|Tsp57|mKIAA0092	7569				1	3.95385	3.89041	3.95213	4.25606	4.1726	3.59119	3.86313	4.15321	4.71353	5.51588	5.92582	5.82951	5.12454	5.07071	5.08966	4.78019	4.78892	5.19187	4.63722	4.44429	3.92248	3.91187	3.98625	4.36639	4.37414	4.31765	4.56794	4.55209	5.5217	5.46899	5.38645	5.17496	4.67953	5.20134	5.00067	4.94451	4.65874	4.79548	4.79316
2	euxassay_000074_11.jpg	NM_172260	216543	Cep68	6030463E10Rik|AI481761|BC027174|Kiaa0582|MGC6990	7569				1	4.84766	4.73092	5.34125	5.47031	5.85164	5.13449	5.19513	5.18258	5.20758	5.48674	6.12731	5.61142	5.82845	5.92584	5.69026	5.79461	5.91677	5.46409	5.15252	4.90216	4.69214	4.71966	5.52852	5.48572	5.31962	5.2965	5.31215	5.12271	5.19263	5.58113	5.33502	5.80325	5.72185	5.72661	5.87758	6.03708	5.56719	5.42838	5.32934
2	euxassay_005069_11.jpg	NM_028083	110749	Chaf1b	2600017H24Rik|C76145|CAF-I p60|CAF-Ip60|CAF1|CAF1A|CAF1P60|MPHOSPH7	7569				1	2.87936	3.35715	3.58223	3.79185	4.08553	4.41672	4.29601	4.19836	4.9487	4.50509	5.75809	6.03589	6.89976	6.35725	5.98913	5.59719	5.04363	4.42011	4.3353	4.32468	3.49961	3.8213	3.97046	3.66219	4.44853	4.60728	4.02352	4.41135	4.31685	4.50004	5.98075	6.031	7.00917	6.89752	6.53688	5.40565	5.19935	5.05332	4.09383
2	euxassay_013995_14.jpg	XM_988338	269610	Chd5	4930532L22Rik|AW060752|B230399N07Rik	7557				1	5.58385	5.1937	5.31773	5.29574	5.27283	5.36536	5.42378	5.35364	5.61089	5.4094	5.65557	5.85291	5.71679	5.58441	5.68858	5.63904	5.24371	5.18543	5.29088	4.78815	5.31658	5.31601	5.29399	5.26689	5.35178	5.18102	5.30446	5.28129	5.43123	5.29088	5.51249	5.45518	5.77601	5.71272	5.54776	5.36146	5.48651	5.55004	5.60432
2	euxassay_012795_14.jpg	NM_016681	50883	Chek2	CHK2|Cds1|HUCDS1|Rad53	7569				1	4.44562	4.63602	5.32838	4.35191	4.7917	4.99555	4.39953	5.18519	5.55725	5.20198	5.65751	5.30559	5.3972	4.83072	4.87144	4.68149	5.02128	4.56894	4.56555	4.23193	4.93021	4.52336	4.22091	4.27514	3.91267	4.11785	4.78742	5.53388	5.72264	5.8472	5.8318	5.66491	5.07854	4.95651	5.02621	4.57903	4.71138	4.51621	4.21907
2	euxassay_001499_11.jpg	NM_011574	21771	Cirh1a	Cirhin|Naic|Teg-292|Tex292	7569				1	5.90887	5.73377	6.08165	6.45018	6.43136	6.27662	6.40626	6.85375	6.7169	6.63346	6.63733	6.70127	6.82802	6.76574	6.63314	6.07275	6.74937	6.35763	5.9387	4.91642	5.23963	5.61124	5.35966	6.31699	6.03548	5.9311	5.88357	6.05923	6.4384	6.31216	6.17468	6.46114	6.59451	6.52798	6.59119	6.7897	6.59186	6.88392	6.08023
2	euxassay_002011_11.jpg	NM_181589	70466	Ckap2l	2010016H04Rik|2610318C08Rik|AV070319	7569				1	4.03677	4.04235	4.54631	4.39343	4.18514	4.28484	4.96818	5.58736	6.6167	6.17041	6.15137	6.03273	6.17707	6.13549	5.79408	5.84424	6.08876	5.56213	5.44742	5.5593	4.57541	4.11286	4.02978	3.98565	3.98131	4.39996	4.39652	5.3823	5.72656	6.11096	6.47252	6.58198	6.84137	5.90346	6.17892	5.78587	5.58402	5.53127	5.57508
2	euxassay_008248_11.jpg	NM_009900	12724	Clcn2	AL118368|ClC-2|Clc2|nmf240	7557				1	4.28009	4.14163	4.21942	4.42592	4.45399	4.66836	4.67214	4.87695	4.83488	4.87586	5.04369	5.0896	5.02805	4.8649	5.19138	5.45306	4.82134	4.7228	4.59862	4.83038	4.19978	4.27623	4.59994	4.91994	4.40034	4.35406	4.73489	5.0553	4.52254	4.65697	4.81793	4.84161	5.02116	4.95344	4.73969	4.65315	4.77173	4.55291	4.44224
2	euxassay_000901_11.jpg	NM_053155	94040	Clmn	9330188N17Rik|AI428889|AI788815|KIAA1188|mKIAA1188	7536				1	4.90695	5.10891	4.98712	4.74389	4.84456	4.85726	4.96969	4.70929	4.59171	4.75665	4.94438	5.21064	4.93305	5.00387	4.85211	4.94871	4.87596	4.69802	4.62519	4.57114	4.63659	4.77517	4.76426	4.6485	4.7951	4.69345	5.01643	4.78932	4.71715	4.80824	5.11366	5.12059	4.99887	5.03191	5.08246	4.86317	4.84004	4.85211	4.73259
2	euxassay_004199_11.jpg	NM_175554	269582	Clspn	B130025E01|C85083|CLASPIN|E130314M08Rik	7569				1	3.96908	4.31077	3.69154	3.59976	3.9502	3.64958	3.9293	4.37528	5.1615	5.74629	5.61944	6.23475	5.33766	4.68253	5.90399	5.1615	5.15432	5.18019	4.62263	4.15663	3.6752	3.75539	3.74033	3.83698	3.75029	3.73633	4.22337	4.37656	4.42711	5.0064	5.51931	5.29202	5.72726	5.71256	4.84287	5.31636	4.96337	5.1075	5.28313
2	euxassay_003332_11.jpg	NM_015827	50797	Copb2	AI256832	7569				1	4.84277	4.9842	5.35701	5.72326	5.57781	5.30849	5.52795	6.33492	6.61268	6.18215	6.13445	6.09337	5.9703	5.8704	6.25322	5.60243	5.47397	5.45857	5.20408	4.92422	5.31656	5.28648	5.21491	5.28751	5.17109	5.45126	5.24164	5.16552	5.61883	5.82799	5.88403	6.389	6.0804	5.91026	6.45169	6.48652	6.13217	5.52535	5.41977
2	euxassay_000875_11.jpg	NM_012003	26894	Cops7a	D6Ertd35e	7569				1	6.2499	6.191	6.34131	6.56637	6.21667	6.27827	6.46985	6.54043	6.53664	6.54901	6.86231	6.76456	6.70926	6.6399	6.52223	6.62488	6.38464	6.48245	6.56307	6.71728	6.40512	6.09531	6.10838	6.38569	6.22869	6.17645	6.41342	6.52728	6.83393	7.0431	6.64728	6.73115	6.69138	6.29061	6.55687	6.37337	6.39981	6.47454	6.71109
2	euxassay_006985_11.jpg	NM_013495	12894	Cpt1a	C730027G07|CPTI|Cpt1	7569				1	6.20064	5.51988	5.39286	5.48021	5.48236	5.24769	5.59343	6.14328	6.61886	6.56418	7.16059	7.09761	6.95954	6.63444	6.81754	6.74952	7.12515	6.68672	6.40683	6.8387	6.05394	5.57606	5.65517	5.43572	5.75591	5.82314	6.17425	7.03665	7.06895	7.05334	6.33617	6.67853	6.36076	6.50584	6.58102	6.49122	6.37338	6.493	6.16131
2	euxassay_004796_11.jpg	NM_007759	12904	Crabp2	AI893628|Crabp-2|CrabpII		marker			2	4.2633	4.34445	4.39866	4.39539	4.62758	4.25753	4.51873	4.68894	4.88522	5.11536	4.77635	5.28118	5.10531	5.25063	4.71968	4.49878	4.55669	4.8716	4.83275	4.63189	4.3742	4.36256	4.36516	4.68686	4.39974	4.11679	4.28657	4.65328	4.49997	4.83181	4.89603	5.15039	5.22942	4.90408	5.03371	5.05074	4.97205	4.97291	5.01235
2	euxassay_004796_14.jpg	NM_007759	12904	Crabp2	AI893628|Crabp-2|CrabpII		marker			2	4.5197	4.75853	4.8354	4.78977	4.75319	4.84305	4.78958	5.65189	5.52465	6.08112	5.44814	5.34228	5.84831	5.71307	5.60062	5.3087	5.36657	5.23059	4.82167	4.57635	4.70524	5.18989	5.18284	5.16597	5.19777	5.29161	5.5022	5.16954	5.15971	5.30221	5.27266	5.6026	5.13529	5.1731	5.65317	5.36812	5.56652	5.33435	4.48338
2	euxassay_013805_11.jpg	NM_172122	230872	Crocc	KIAA0445	7569				1	3.78891	4.83554	4.75302	4.83714	4.93994	4.91131	4.9189	5.00984	5.37998	5.60524	5.80768	5.58423	5.3972	5.49285	5.55611	5.65274	5.15327	5.30762	4.8438	4.89678	4.44982	4.93096	4.51437	5.15637	4.71254	5.01386	4.98968	4.93483	5.2463	5.43906	6.22692	5.80482	5.57473	5.91872	5.69564	5.39402	5.25192	5.33898	5.68426
2	euxassay_004853_11.jpg	NM_009976	13010	Cst3	CysC	7569				1	5.55361	5.57529	5.56923	5.67027	5.87314	5.68218	5.69089	6.24098	6.66314	6.54486	6.6034	6.55	6.73187	6.46645	6.22478	6.21564	6.24183	6.18843	6.28769	5.75967	5.93681	5.51206	5.62551	5.38893	5.45108	5.3533	5.86161	6.00828	6.0654	6.24521	6.66473	6.78123	6.77041	6.47341	6.32176	6.27035	6.37603	6.35239	6.1517
2	euxassay_012486_11.jpg	NM_009980	13017	Ctbp2	AA407280|D7Ertd45e|Gtrgeo6|Ribeye	7569		mouseTF		1	5.50377	5.38156	5.28139	5.83718	5.70155	5.61643	5.88904	5.64447	5.70514	5.51082	5.77364	6.16776	6.59416	6.69353	6.55458	5.89237	6.04971	6.33786	5.69114	5.5936	5.33135	5.37385	5.75249	5.87636	5.84649	5.36221	5.62349	5.43627	6.14717	5.62187	5.86998	6.5392	6.28031	6.28751	5.97216	6.27756	6.02875	5.74951	5.76079
2	euxassay_009189_11.jpg	NM_028836	74245	Ctbs	2210401K11Rik|CTB	7569				1	4.13719	4.26274	4.48518	4.32805	3.9754	4.47512	4.84223	3.93405	4.62036	4.06815	4.32964	5.16531	5.33476	5.29856	5.15971	4.48982	4.00715	4.72165	4.26441	4.45004	4.00765	4.24595	3.80466	3.75091	3.92352	3.85428	3.959	4.02941	4.13171	4.80372	4.53305	4.44158	4.83129	5.19952	4.37284	5.09553	5.20605	4.67691	4.31562
2	euxassay_007276_14.jpg	NM_012042	26965	Cul1	-	7569				2	4.72952	5.14868	5.34189	5.22084	5.68732	6.2477	6.80433	6.14978	6.38781	5.75874	6.52135	5.91226	6.06407	5.8127	6.33336	6.41587	5.87958	6.14558	5.43852	5.34808	4.81173	4.10051	5.14529	4.88476	5.44989	5.72342	5.73588	6.05773	6.50628	5.94157	6.13218	6.28569	6.17801	6.06941	6.4328	5.78686	6.03223	5.79755	5.55756
2	euxassay_005073_14.jpg	NM_138601	28295	D10Jhu81e	C21orf33|ES1	7569				1	3.5474	3.64246	3.74764	3.54968	3.71342	4.11138	4.15402	4.63027	4.95708	4.33171	4.55952	4.95794	4.99192	4.40037	4.73028	4.88657	4.68177	4.45645	4.14469	4.10052	3.6209	3.91106	3.77522	4.29679	3.55196	3.33614	3.87328	3.67001	4.14952	4.98096	4.50173	4.79138	4.88296	4.547	4.59533	4.13133	4.5109	4.67551	4.15912
2	euxassay_001879_14.jpg	NM_177259	13131	Dab1	AI956902|C630028C02Rik|scm|scr|scrambler|yot	7569				1	5.01675	7.14677	6.80644	5.77146	5.86862	6.34452	6.51371	6.79783	7.20849	6.8068	6.87086	6.73864	6.38808	6.38935	6.33214	6.40078	6.10414	6.45172	5.77097	6.09791	4.3989	5.4164	7.17838	6.25972	5.58951	5.43875	5.71077	7.04605	6.87804	6.60998	7.32979	7.13427	6.70945	6.93788	7.10711	6.98335	6.9066	7.11291	6.51911
2	euxassay_012739_14.jpg	NM_007826	13134	Dach1	AI182278|Dac|Dach|E130112M23Rik	7557|7569				1	5.1538	4.5539	4.4613	4.38005	4.60937	4.57423	4.90673	5.39765	5.31089	5.80277	5.51697	5.87165	6.06157	5.85197	5.86224	4.90674	5.52893	5.29231	6.09009	5.20995	5.30105	6.09277	4.3102	4.44247	4.53723	4.52336	4.73765	5.0491	5.52644	5.37851	5.74117	6.03457	6.05676	5.59343	5.56178	5.46141	5.70782	5.68841	5.40226
2	euxassay_005958_11.jpg	NM_010024	13190	Dct	DT|TRP-2|TRP2|Tyrp-2|Tyrp2|slaty|slt	7569				1	5.94264	5.34004	5.53415	5.22849	5.07882	5.22436	5.33345	6.09492	5.93269	6.91226	6.56822	6.67045	6.59168	6.54756	6.16106	6.30036	6.13131	6.56338	6.07298	5.95243	5.89817	5.83378	5.64166	5.39352	5.52963	5.74647	5.37046	6.38801	7.10424	6.9735	6.94534	6.78743	6.85783	6.01077	6.64871	6.93162	6.59385	6.45427	6.39741
2	euxassay_012699_14.jpg	NM_019670	56419	Diap3	4930417P13Rik|Dia2|Diaph3|Drf3|KIAA4117|mDia2|mKIAA4117|p134MDia2	7569				1	4.34143	3.76316	3.83232	3.67336	4.18718	4.06646	3.98058	3.94385	4.39615	4.73139	5.28512	5.11251	4.936	5.2331	4.90957	4.43372	4.81756	4.05823	4.41237	4.03467	3.71537	4.00503	3.7868	4.14493	4.27245	4.19829	4.10423	4.54483	4.85127	4.51909	4.96488	5.5073	5.30958	5.49415	4.99679	5.18544	4.82566	4.35198	4.19829
2	euxassay_005045_11.jpg	NM_173419	239133	Dleu7	BC038059|MGC47306	7569				2	4.11772	4.24829	4.40933	4.52246	4.47856	4.12692	4.49855	4.68084	4.64028	4.56507	4.54186	4.78568	4.61433	4.61433	4.7312	4.63125	4.4612	4.40745	4.53738	4.14516	4.21587	4.15868	4.11772	4.31906	4.19502	4.27503	4.36179	4.53911	4.65307	4.91988	4.71908	4.6645	4.65943	4.41986	4.5028	4.64028	4.41986	4.69576	4.4843
2	euxassay_005045_14.jpg	NM_173419	239133	Dleu7	BC038059|MGC47306	7569				2	3.99636	4.09614	4.10947	4.18317	4.11212	4.10947	4.03459	3.98483	4.13706	4.18443	4.18695	4.19822	4.33612	4.50094	5.05025	4.59869	4.57295	4.39282	4.38954	3.70652	3.97066	3.83403	3.83403	3.83403	4.04156	4.03179	4.07047	4.01914	3.91672	4.13966	4.38078	4.40476	4.31442	4.51603	4.37637	4.59491	4.46821	4.13836	4.23151
2	euxassay_010997_11.jpg	NM_007868	13405	Dmd	DXSmh7|DXSmh9|Dp427|Dp71|mdx|pke	7540				1	3.96347	4.11521	3.94872	4.21353	3.98965	3.87727	3.93381	3.66801	4.04203	4.58858	4.17981	4.05839	4.96166	4.76345	4.17686	4.22623	4.37012	4.31883	4.29589	3.87753	3.91268	3.71759	4.07773	3.69124	3.66981	3.80046	3.78227	3.93829	4.09122	4.31366	4.56652	4.25009	4.21188	4.47715	4.21476	4.34798	4.05196	4.02923	4.05839
2	euxassay_019652_14.jpg	NM_007879	13494	Drg1	AA408859|AI132520|Nedd3	7569				1	5.23141	5.33035	5.92575	6.37041	6.00277	6.36653	6.05995	6.16645	6.62629	6.74636	6.71771	6.99239	6.91325	7.03421	6.88324	6.80283	6.95244	6.8422	6.5897	6.45183	5.29306	5.53451	5.85406	5.96777	6.05474	6.15149	6.21113	6.23828	6.6206	6.63948	6.59512	6.50357	6.88754	7.01715	7.03803	6.61761	6.66393	6.45446	6.39348
2	euxassay_000048_14.jpg	NM_183089	72107	Dscc1	2010006I05Rik|2600005O03Rik|Dcc1|MGC151210|MGC151212	7536				1	5.97382	6.2627	6.06091	6.0323	6.39354	5.91711	6.19342	5.90004	6.35489	6.30143	6.51244	6.57329	5.79482	5.93399	5.99483	5.92729	6.01914	6.1049	5.96242	6.08142	6.04401	6.24759	5.98954	5.78613	5.76093	5.66815	6.13121	6.12111	6.03768	6.50363	6.37974	5.89627	6.1539	6.32781	6.19079	5.84183	5.9879	5.63885	5.69717
2	euxassay_001983_11.jpg	NM_025853	66934	Dsn1	1700022L09Rik|AW552447	7569				1	3.69092	3.61882	4.03528	4.04664	3.93927	3.98047	4.23008	4.75922	5.16277	5.4487	6.32606	5.24059	6.50791	5.83812	5.35075	5.37181	4.78929	4.82366	5.50908	4.71433	3.83455	3.9058	4.3291	4.12068	4.21864	4.44157	4.27906	4.29412	5.12269	6.46561	5.43826	5.71291	5.22695	5.74814	4.88841	4.87482	4.87044	4.51422	4.60792
2	euxassay_012578_14.jpg	NM_029766	76843	Dtl	2810047L02Rik|5730564G15Rik|Ramp	7569				1	3.41535	3.78219	3.9982	3.69576	3.92411	4.03973	4.02799	3.8053	4.66183	4.35223	4.14677	4.53516	4.06533	4.20007	4.42754	4.47696	4.65771	4.54034	4.07962	4.0067	3.77752	3.72028	3.57988	3.74918	4.08954	3.77518	3.95337	4.03973	5.02395	5.43711	4.89574	4.47155	4.93426	4.92373	4.95766	4.21741	4.13542	4.53861	4.12397
2	euxassay_009768_14.jpg	NM_130447	70686	Dusp16	3830417M17Rik|AW558566|D6Ertd213e|MKP-7|MKP7|Mkpm	7569				1	4.10526	3.74474	3.66642	3.56679	3.80189	3.7889	4.0226	3.9927	4.78077	4.90768	5.32624	4.5624	4.79465	5.17788	4.77471	4.90195	4.74854	4.12278	4.09625	4.14366	3.94926	3.7191	3.73122	3.78163	3.7918	3.74922	3.96474	3.87609	4.60172	4.63436	4.96847	5.25224	4.61731	5.18167	5.17558	4.83934	3.95278	4.44219	4.00363
2	euxassay_004327_11.jpg	NM_007900	13605	Ect2	AI528536|KIAA4037|mKIAA4037	7569				1	4.16898	4.50764	4.22292	4.95692	5.79334	5.95763	6.34287	6.95798	6.50943	5.97557	6.29713	6.2093	5.58672	6.02021	5.50578	5.50154	5.79103	5.86054	5.64362	5.64875	3.90219	5.06638	4.84629	5.06877	5.72659	6.44029	6.88499	6.33654	6.71749	6.15319	6.26872	6.21319	6.56771	6.16083	6.1023	6.33535	6.69446	6.28936	5.51352
2	euxassay_012474_11.jpg	NM_203508	219026	Eddm3b	Fam12|Gm75	7569				2	3.89374	3.93205	4.23926	4.35501	4.60996	5.09017	5.54011	5.71691	5.70529	5.69666	5.4724	5.39031	5.24888	5.11421	4.92138	4.7473	4.52513	4.47195	4.45195	4.35736	4.30723	4.03538	4.22732	4.5192	4.54964	4.57003	5.09205	5.51789	5.72057	5.71325	5.45788	5.43879	5.42244	5.36292	5.12182	4.68167	4.61781	4.6485	4.58647
2	euxassay_012474_14.jpg	NM_203508	219026	Eddm3b	Fam12|Gm75	7569				2	4.5451	4.67269	4.57423	4.74621	4.85861	4.82035	4.69393	5.0506	5.21355	5.27072	5.37869	5.18299	5.13514	5.16672	5.19325	4.84101	4.96337	4.93308	4.79652	4.53361	5.04008	4.70217	4.74663	4.74663	4.72356	4.73163	4.78396	4.85677	5.10129	5.33104	5.4452	5.43289	5.36838	5.22574	5.19951	5.41321	5.26768	5.16061	4.84194
2	euxassay_002855_11.jpg	NM_007904	13618	Ednrb	AU022549|ET-B|ET>B<|ETR-b|ETb|Sox10m1|s	7569				2	5.66858	5.56161	5.72552	5.8018	5.62795	5.60507	5.70635	5.96686	6.94092	6.86106	7.00778	7.12687	7.01565	6.9452	6.55271	6.47465	6.66991	6.85392	6.8949	6.59256	5.63534	5.82663	5.62609	5.59326	5.55286	5.45967	5.72595	5.98325	6.17451	7.08366	7.12625	7.34104	6.93082	6.76017	6.86405	7.28957	7.16498	6.9504	6.52018
2	euxassay_000063_14.jpg	NM_021876	13626	Eed	ENSMUSG00000039373|l(7)5Rn|l7Rn5|lusk	7540|7569				1	4.56564	4.98856	4.75889	4.84786	5.19169	5.21562	5.22422	5.95077	5.87768	5.92725	6.1314	5.84389	6.44281	5.87495	5.83759	5.59553	5.75244	5.64201	5.75763	5.45643	5.40533	4.92244	4.57273	4.99837	5.21885	4.96412	5.03795	5.77457	5.65877	5.93971	6.09552	5.74573	6.0683	5.84459	5.94362	6.02629	5.57578	5.61556	5.96002
2	euxassay_018950_11.jpg	NM_010111	13642	Efnb2	ELF-2|Epl5|Eplg5|Htk-L|LERK-5|Lerk5|NLERK-1	7538|7569				1	5.54992	6.16145	6.18808	6.32005	6.16241	6.65899	6.65922	6.35656	6.6687	6.39407	6.287	6.39679	6.28254	6.35907	6.62006	6.51764	6.37525	6.52375	6.4959	6.1981	5.70371	6.21823	6.21761	6.14115	6.25976	6.47765	6.60261	6.41462	6.30565	6.40168	6.42238	6.26692	6.50211	6.41462	6.5661	6.55478	6.55364	6.26528	6.36589
2	euxassay_011475_11.jpg	NM_026892	68969	Eif1b	1500010M16Rik|3110001N14Rik|Gc20	7569				1	4.51504	5.01469	4.91991	5.0014	5.10905	4.91105	5.28915	5.95656	5.51487	5.87914	6.23461	5.64486	5.75819	6.4461	5.78286	6.13548	5.7216	5.49865	5.68155	4.92238	5.07141	5.41045	4.80801	4.70237	5.29977	5.11045	4.92449	5.17754	5.58801	5.6105	6.30604	5.73971	6.24437	5.54196	6.14412	5.76822	5.81795	5.48297	5.6828
2	euxassay_012863_11.jpg	NM_153403	236511	Eif2c1	Ago1	7569				1	3.67507	3.74847	3.92417	4.45427	4.51045	5.08097	5.66389	4.99562	4.54634	4.74173	4.90311	4.88605	5.28043	4.96601	5.36843	5.08963	4.95227	4.91892	4.47725	4.34467	3.52301	4.1755	4.45793	4.23488	4.67008	5.49052	6.05478	5.86889	5.57085	4.7655	4.43093	4.82891	5.21289	4.67532	5.47138	4.7487	5.0912	4.75999	4.56248
2	euxassay_012451_11.jpg	NM_026114	13665	Eif2s1	0910001O23Rik|2410026C18Rik|35kDa|Eif2a|eIF2alpha	7569				1	4.67581	4.48141	4.89368	5.75104	5.22614	5.26487	4.99936	5.44432	5.42206	5.14691	6.20773	6.21206	5.87458	5.88366	6.43686	5.67035	5.41255	5.11982	4.75571	4.78857	4.8813	4.51234	4.63998	4.86175	5.31807	4.7422	4.90977	5.17529	5.47527	5.907	5.78147	5.54446	6.57973	6.11364	5.724	6.06738	6.0026	5.63917	4.7352
2	euxassay_019462_14.jpg	NM_019680	56501	Elf4	AV314029|BC042423|ENSMUSG00000053512|Gm9907|MGC129343|MGC129361|Mef	7557				1	4.53327	5.00698	5.18442	5.24666	4.97685	4.75566	5.40583	5.12529	5.26345	5.54084	5.70567	5.6849	5.69378	5.31958	5.43841	5.40151	5.38735	5.16477	5.02828	4.68708	4.74715	4.75141	4.91367	4.9659	4.87751	4.68352	4.74288	5.19071	5.38352	5.51352	5.68223	5.6184	5.67283	5.65158	5.28535	5.30344	5.44263	5.21187	4.98771
2	euxassay_015879_11.jpg	NM_007927	13726	Emd	AW550900	7569				1	3.9537	4.11966	4.20731	5.24138	4.65823	4.15787	4.00053	4.52114	4.72642	5.19575	5.49418	5.86859	5.47051	4.7167	4.73367	5.18786	4.69458	5.43686	4.62613	4.51834	4.41443	3.98913	4.49151	4.97194	4.5488	4.48866	4.57055	4.06707	4.94617	4.54193	4.96477	5.4376	4.60125	4.5378	4.81792	4.51974	4.40941	5.06299	5.03686
2	euxassay_019478_11.jpg	XM_132640	13796	Emx1	MGC129284|MGC129285	7540	marker	mouseTF		1	4.26846	4.48005	4.32073	4.44073	4.49577	4.68837	5.16032	5.33965	5.97027	5.99007	5.85314	5.91979	5.86584	5.99007	5.7049	5.80979	5.26157	5.03782	5.03587	4.40524	3.97219	4.14704	4.63518	5.00924	5.18344	4.65058	4.88888	5.5293	5.80635	5.91661	5.66439	5.71775	6.00313	5.87242	5.98603	5.81093	5.58446	5.0999	4.80879
2	euxassay_006635_11.jpg	NM_175009	223527	Eny2	1810057B09Rik|6720481I12|DC6|Ey2	7569				2	5.5196	5.5257	5.32838	5.38126	5.58868	5.32538	5.55412	5.968	6.50447	6.44223	5.8576	5.77146	5.40321	6.06037	6.44637	6.45188	6.07946	6.34304	6.45295	6.48551	5.37355	5.01353	5.68156	5.37548	5.64342	5.48691	5.77731	5.98645	6.34106	6.31311	6.23493	6.25815	6.32716	6.29536	6.1169	6.22585	6.37574	6.40015	6.26754
2	euxassay_006635_14.jpg	NM_175009	223527	Eny2	1810057B09Rik|6720481I12|DC6|Ey2	7569				2	4.76621	4.45003	5.01651	5.60128	5.55429	5.15252	5.2834	5.73008	6.15676	5.48655	6.23588	6.682	6.32416	5.96017	6.0558	5.7451	5.45894	5.6378	6.05857	5.31636	4.70237	4.53546	5.08139	5.32638	4.76856	4.84417	5.06232	5.63264	5.54677	5.41095	6.52202	6.10972	6.31855	6.1892	5.72068	6.16684	5.80696	5.81766	5.67042
2	euxassay_012376_11.jpg	NM_134065	105298	Epdr1	AU040950|AV006210|Epdm2|Epdr2|MERP-1|MERP-2|MERP2|Ucc1	7569				1	4.02276	3.9644	4.03063	4.44103	4.25709	4.34175	4.24192	4.45279	4.84738	4.9063	4.61856	4.89665	4.82494	5.01936	4.83705	4.80873	4.62767	4.55793	4.61954	4.68332	4.49605	4.46154	4.5869	4.12736	4.12	4.247	4.4112	4.34017	4.89665	4.26545	4.4425	5.34179	4.83143	4.85516	4.82437	4.83705	4.76518	4.43548	4.58823
2	euxassay_002051_11.jpg	NM_145615	110842	Etfa	2010200I21Rik|D9Ertd394e	7569				1	4.22776	4.75399	4.45569	4.32583	4.32583	4.30571	4.70421	4.82153	5.07319	5.43041	6.02818	6.30045	6.60875	6.25106	5.68879	5.73768	5.60729	5.18096	4.82859	4.31781	4.32183	4.49176	4.30266	4.25204	4.28838	4.17426	4.11305	4.36038	4.77983	5.47344	5.77292	6.14293	5.5335	5.68763	5.89209	5.9307	5.639	5.3393	5.132
2	euxassay_000518_11.jpg	NM_023794	104156	Etv5	1110005E01Rik|8430401F14Rik|ERM	7569		mouseTF		1	5.85449	5.75945	5.37442	5.50087	6.01629	5.81745	5.84169	6.15502	6.58853	6.64119	6.359	6.3198	6.21796	6.11024	6.08047	6.30639	6.12823	5.93543	5.84699	5.80245	5.67349	5.64687	5.61451	5.5448	5.59872	5.6984	5.8556	6.15096	6.04522	6.35391	6.39668	6.25956	6.38522	6.1811	6.17612	6.09109	6.08638	6.19648	6.28034
2	euxassay_008408_11.jpg	NM_012012	26909	Exo1	5730442G03Rik|Msa	7557|7569				1	5.0625	5.17659	5.32493	5.38562	5.45852	5.39232	5.61225	6.80054	6.85971	6.81271	7.33067	7.28412	6.75303	6.30733	6.14239	6.24476	6.04318	6.05347	6.01619	5.65821	4.95678	5.40656	5.30783	5.08392	4.96065	5.0601	5.65424	6.3154	7.2154	7.53981	7.40561	7.29053	6.55288	6.74857	6.77405	6.19147	6.13955	6.27336	5.83804
2	euxassay_012334_14.jpg	XM_284543	66446	Exosc7	2610002K22Rik|AV212732|mKIAA0116	7569				1	4.83259	4.58126	4.80514	4.86321	4.87509	5.05141	5.01138	5.06104	5.42233	5.93803	6.19628	5.92665	5.64315	5.7458	5.54334	5.54608	5.63651	5.26684	4.90857	4.53822	4.70114	5.04089	4.8438	4.95909	4.72457	4.72356	5.07854	5.20126	5.50172	5.83086	5.85691	6.16944	6.06037	5.78121	5.67069	5.49048	5.4102	5.43041	5.04689
2	euxassay_009206_14.jpg	NM_009510	22350	Ezr	AW146364|MGC107499|R75297|Vil2|p81	7569				1	4.05616	4.4229	4.27894	4.69869	5.76184	5.95044	6.36642	6.41344	6.77427	7.00743	7.22876	6.92382	6.74618	7.05233	7.00269	6.3861	6.71386	6.90949	6.90709	6.78362	3.43567	4.45127	5.06872	4.37606	5.12492	6.00388	6.04492	6.27657	6.79977	6.49253	6.98727	6.87577	6.95955	6.76428	7.1354	6.68704	6.88393	6.72694	6.02962
2	euxassay_000474_11.jpg	NM_021272	12140	Fabp7	B-FABP|BFABP|Blbp|MRG	7557|7569				2	6.11803	6.19152	6.17276	5.93058	5.86416	5.91605	6.07287	6.52642	6.74691	6.78636	6.8077	6.72617	6.85278	6.80627	7.03567	6.51174	6.82505	6.80311	6.96378	6.42074	5.95577	6.18676	5.99358	5.95059	6.17867	6.08536	5.93058	6.33973	6.65069	7.22501	7.26707	7.157	6.68978	6.87279	6.58436	6.72283	6.58503	6.55227	6.14984
2	euxassay_000474_14.jpg	NM_021272	12140	Fabp7	B-FABP|BFABP|Blbp|MRG	7569				2	6.21281	5.81843	5.81577	6.00637	5.94056	5.95355	6.4724	6.82011	6.92778	6.75985	6.79434	6.74886	6.18796	6.61659	6.59983	6.33579	6.25539	6.02372	6.11444	6.12962	5.66417	5.8882	5.73762	6.25329	6.04281	6.55621	6.20196	6.63025	6.64281	6.42654	6.49461	7.04942	6.58019	6.27333	6.37223	6.46443	6.28159	6.33022	6.17913
2	euxassay_011616_11.jpg	NM_026640	107373	Fam111a	4632417K18Rik|AW413625	7569				1	3.7885	3.65171	3.51642	3.48813	3.79387	3.62967	3.64073	3.74688	3.71585	4.16329	4.49723	4.28104	4.70026	4.19864	4.2549	3.77225	3.86475	3.86475	3.84894	4.12312	3.73683	3.65171	3.65171	3.6644	3.79573	3.30967	3.48455	3.61783	3.93587	4.15753	4.2061	3.9353	4.80391	4.59901	4.43613	4.5578	3.962	3.87883	3.74689
2	euxassay_010984_11.jpg	NM_177628	219148	Fam167a	A030013D21	7569				1	4.51387	4.7713	4.31212	4.05678	4.1119	4.17981	4.19593	4.1119	4.4891	5.11985	5.14875	5.36812	5.95346	6.11666	6.13092	5.31435	4.61611	4.89785	4.94024	4.99254	4.20755	3.96396	4.08539	4.31212	3.95365	4.08066	4.12114	5.08564	5.29746	5.29325	5.86766	5.49368	5.36424	5.39656	5.42818	5.13163	4.89354	5.1123	5.32399
2	euxassay_003359_14.jpg	NM_146261	245622	Fam199x	MGC19245	7569				2	4.86776	5.21641	5.5561	5.37288	5.15249	5.15849	5.22286	5.76458	6.19116	5.91756	6.28665	5.97679	6.09031	6.08371	5.93443	5.95059	6.21725	6.23055	6.02584	5.96811	5.29608	5.00138	5.58755	5.33566	4.96677	5.0097	5.2526	5.78701	5.96264	6.14547	6.19445	6.14615	6.23396	5.95474	5.72855	5.7685	6.10389	6.22155	6.13433
2	euxassay_007512_11.jpg	NM_025377	66140	Fam33a	1110001A07Rik|C78640|MGC151378|Ska2	7569				1	4.97578	5.50028	5.39755	4.99266	5.07105	5.30732	6.38122	6.06419	5.77026	6.61461	6.28938	5.98221	6.17911	6.26874	5.50864	5.49306	6.02024	5.71802	5.00769	5.72046	4.83405	4.79705	5.07423	4.84152	5.09079	5.74508	6.14191	6.3069	6.06698	6.06977	6.05859	6.07533	6.26964	6.09968	5.69696	5.27111	5.88193	5.55165	5.3534
2	euxassay_006378_11.jpg	NM_027975	71878	Fam83d	2310007D09Rik|BB104611|MGC92947	7569				1	4.01398	4.37069	4.38099	4.21828	4.68715	4.90967	4.69646	4.58733	5.01671	5.04692	5.36479	5.68864	6.11514	5.74053	5.50258	5.24802	5.22391	4.91145	5.20882	5.02821	3.99112	4.2024	4.33085	4.2024	4.25372	4.35791	4.37124	4.7256	4.90446	5.19691	5.46609	5.39811	5.28	5.23531	5.12403	5.14683	5.0614	4.98669	4.69233
2	euxassay_012452_14.jpg	XM_986338	72775	Fance	2810451D06Rik|AI415634|AW209126	7569				1	4.5968	4.34273	4.48552	4.73464	4.6929	4.44194	4.67628	4.74165	4.86596	5.12675	5.03194	5.13133	5.12139	5.01552	4.84566	4.82601	4.83634	4.82394	4.58972	4.10167	4.49503	4.61436	4.49385	4.61109	4.5565	4.5197	4.53822	4.52783	4.53707	4.83727	5.088	5.25961	5.13285	5.30627	5.2463	4.88326	4.97531	4.64245	4.47907
2	euxassay_006857_11.jpg	NM_025923	67030	Fancl	2010322C19Rik|AW554273|B230118H11Rik|Phf9|Pog|gcd	7569				1	5.70578	5.42776	4.98017	4.83701	4.85559	4.98017	4.82104	5.30662	5.77083	6.08982	5.86515	5.77318	5.94798	5.55527	5.87611	5.38082	5.0818	5.43519	5.1726	5.60618	5.20686	5.10263	5.23124	4.90279	4.99448	4.75529	5.29863	5.73637	5.74177	5.99348	5.93389	6.24582	5.68308	5.67808	6.04148	5.91754	5.41504	5.26804	5.24371
2	euxassay_004980_11.jpg	NM_198176	380601	Fastkd5	C78212|FLJ13149|KIAA1792|MGC60835|mKIAA1792	7569				1	3.82905	4.18976	4.41686	4.47328	4.27916	4.48859	4.58791	4.92306	5.25736	5.38636	5.49414	5.38713	5.49129	5.04751	5.18253	5.19133	5.03094	4.72515	4.41084	4.35083	3.91657	4.178	4.53911	4.64327	4.8154	4.81065	5.02848	5.32223	5.42903	5.54172	5.25316	5.33248	5.69005	5.42568	5.10174	4.93254	4.561	4.31262	4.15599
2	euxassay_011346_11.jpg	NM_176982	319701	Fbxo48	A630050E13Rik	7569				1	4.32097	4.42413	4.35271	4.07053	4.07846	4.16738	4.29263	4.20987	4.28716	4.54006	4.59526	5.1849	5.27873	5.14921	4.69538	4.69909	4.5633	4.67545	4.6679	4.2712	4.18805	4.06575	4.57523	4.52389	4.09887	4.29126	4.15843	4.03348	4.79998	5.31072	5.35904	4.92836	5.07189	4.56849	4.83784	4.47812	4.61	4.57276	4.48958
2	euxassay_012335_11.jpg	NM_025995	67141	Fbxo5	2510044I10Rik|C85305|Emi1|Fbxo31	7569				1	3.6844	3.60005	3.59057	3.59057	3.66828	3.81216	4.19007	5.5081	5.44388	5.43526	5.51921	5.78113	5.31894	5.01621	4.60434	4.28338	3.82542	3.96882	3.99418	4.13313	3.34677	3.59057	3.59057	3.846	3.96711	4.06134	4.02733	4.81167	5.45793	5.83314	5.96344	5.46399	5.10272	5.6516	4.80976	4.35824	4.0092	4.06613	3.8571
2	euxassay_012610_14.jpg	NM_146054	218952	Fermt2	AA960555|Kindlin-2|MGC36305|Mig2|Plekhc1	7569				1	4.62955	4.16499	4.99555	5.00972	4.47595	4.34798	4.40836	5.25891	5.15627	5.33303	5.37548	5.25542	5.19398	5.13285	4.99136	4.99756	5.53852	5.52744	4.70114	4.19739	4.13945	4.60561	5.72574	4.47715	4.75754	4.34273	4.28907	4.73965	4.39826	5.33104	5.76656	5.23995	5.39212	5.71815	5.69873	5.38446	4.97106	4.65735	5.28751
2	euxassay_004690_14.jpg	NM_021891	60530	Fignl1	-	7569				1	5.37631	5.30974	5.01268	5.66964	5.09806	4.84752	4.85466	5.42456	6.53467	6.64838	6.40286	6.01488	6.51652	6.06328	6.22386	5.54471	5.37548	5.1998	5.52975	5.07061	5.53041	5.2155	4.89216	5.32752	5.22043	5.09136	5.44205	5.29406	5.52296	5.89378	6.18788	6.17969	6.10646	5.99383	5.89493	5.384	5.30627	5.6955	5.4373
2	euxassay_010964_11.jpg	NM_212435	114142	Foxp2	2810043D05Rik|AI449000|CAG-16|D0Kist7	7557	marker	mouseTF		1	5.79604	5.89499	6.30154	5.60891	5.87237	6.42421	6.80792	7.14681	7.03228	6.76681	6.54168	6.58039	6.4114	6.57636	6.50297	6.78843	6.7256	6.74066	6.51353	6.08195	5.18571	5.93003	5.89679	5.70577	5.89499	6.32972	6.86244	6.65408	6.92666	6.66754	6.54128	6.5924	6.21176	6.73375	6.374	6.17717	6.37362	6.18909	6.09935
2	euxassay_005187_14.jpg	NM_022004	59095	Fxyd6	0610030I18Rik|Php	7469				1	5.51989	5.15477	4.67628	4.74464	4.54052	4.80801	4.77326	4.8213	5.36125	5.15702	5.57865	5.33237	5.95363	5.82983	5.65952	5.24249	5.5399	5.26768	5.19951	5.91146	5.24207	5.21786	4.98968	4.98209	4.70114	4.71646	4.89857	5.05623	5.71408	5.95233	5.7453	5.62107	5.56799	5.4237	5.53921	5.36268	5.52187	5.03716	5.01154
2	euxassay_008309_11.jpg	XM_916560	14371	Fzd9	mfz9	7569				1	4.73248	4.69274	4.83573	4.86765	5.42255	5.88469	6.00813	5.66456	5.98807	5.6904	5.49661	5.54205	5.6577	5.66509	6.01496	5.65664	5.88988	5.64173	5.70865	5.70967	4.40754	4.81024	4.83853	5.08984	4.76527	4.8483	5.19204	5.86489	6.19914	6.32244	5.94643	6.09159	5.66087	5.51776	5.22098	5.24231	6.07326	5.89618	5.76476
2	euxassay_000619_14.jpg	NM_175935	68401	G6pc3	0710001K01Rik|AU019276|AU045429|AV128920|AW545836|UGRP	7569				1	4.7273	4.71428	5.06012	4.93158	4.69525	4.81588	5.27988	5.11236	5.66294	5.68648	5.25351	5.43058	5.50366	5.4312	5.31185	5.2888	5.33189	5.43368	5.18979	5.59216	4.74876	5.05531	5.13632	4.95182	4.90749	5.04147	5.19272	5.10849	5.17212	5.16989	5.12083	5.25771	5.52644	5.21159	5.20653	5.17212	5.24579	4.92895	4.89613
2	euxassay_006314_11.jpg	NM_008072	14403	Gabrd	AI853201|MGC151209|MGC151213	7569				1	4.68219	3.56388	3.88599	4.20236	4.12981	4.01888	4.03574	4.55145	5.1701	5.21025	6.45534	6.23621	6.50837	6.61548	6.39621	5.9646	5.56105	5.8458	4.56989	4.36622	4.38798	3.78058	3.73013	3.98548	3.98041	3.94702	4.198	3.95221	4.54901	5.26495	6.55563	6.56848	6.28225	6.4135	6.07674	5.44651	5.38646	4.76189	4.947
2	euxassay_004959_11.jpg	NM_013814	14423	Galnt1	-	7569				1	4.40807	4.37714	4.90319	4.8486	5.13786	5.303	5.20521	5.2737	5.38913	5.95868	6.22183	6.6496	6.32169	6.41212	6.30324	6.41266	5.72366	5.91228	5.76383	5.48018	4.71394	4.67604	4.58045	5.19891	5.56589	5.6844	4.98356	5.54145	5.82166	6.22121	6.39508	6.69164	6.31394	6.55779	6.51236	6.03958	6.49316	5.668	5.20459
2	euxassay_002896_14.jpg	NM_008095	14467	Gbas	AV006093|Nipsnap2	7569				1	5.70233	6.33611	6.3116	6.18788	6.44453	6.43438	6.71098	6.41525	6.41525	6.56074	7.06593	6.95143	7.06353	6.96935	6.81939	6.7296	6.56892	6.80082	6.88596	6.71034	6.33363	6.1517	6.28461	6.34156	6.56286	6.41102	6.31965	6.38392	6.37042	6.56836	7.14224	6.92133	6.79097	6.80895	6.82388	6.85468	6.79927	6.58765	6.4505
2	euxassay_012524_14.jpg	NM_145523	227960	Gca	5133401E04Rik|AI573844	7569				1	4.3434	4.25501	4.2598	4.09136	3.93695	3.93321	4.52346	5.14138	5.10458	5.49061	4.7977	4.95067	4.54536	4.85236	5.15118	4.57032	4.50475	4.35483	4.97551	4.53503	4.11402	4.40955	4.31146	4.22226	3.92192	4.12718	4.59437	4.43729	4.35015	4.71771	4.69417	4.72581	4.52925	4.57481	4.68589	4.85974	4.54536	4.45811	4.29075
2	euxassay_003568_11.jpg	NM_024240	109145	Gins4	2810037C03Rik|4933405K01Rik|Sld5	7569				1	6.02526	5.9705	6.14487	5.99165	6.03222	6.13083	6.17106	6.41129	6.45641	6.7787	7.03486	7.05107	6.51601	6.58052	6.47665	6.07921	5.91685	6.07406	5.96127	5.8316	5.94879	5.99542	6.05329	6.35594	6.29021	6.31391	6.01208	6.15839	6.44111	6.7307	6.96857	6.96451	6.74148	6.69788	6.6614	6.28473	6.13578	6.05168	5.79876
2	euxassay_012257_14.jpg	NM_008122	14615	Gjc1	C130009G16Rik|Cnx45|Cx45|Gja-7|Gja7	7557|7569				1	4.97658	5.61328	4.56994	4.99379	4.95917	4.63848	4.806	4.95194	5.37683	6.13788	5.5052	6.03162	5.54557	5.54488	5.5189	5.37277	5.00332	5.26538	4.874	5.17842	4.83437	6.27543	5.09762	4.98167	4.71981	4.90455	4.92686	5.02268	5.51575	5.49386	5.15274	5.5531	5.71703	5.88241	5.31556	5.4194	5.14823	5.32358	5.02071
2	euxassay_008920_14.jpg	XM_136212	14633	Gli2	AW546128	7569		mouseTF		1	5.43212	5.04037	5.28694	5.29267	4.94055	5.04232	5.51788	5.35666	5.52277	6.01786	5.66351	6.06794	5.94947	5.78128	5.65336	5.87713	5.41193	5.85292	5.56028	5.34449	5.05684	5.14102	4.68291	4.95302	5.08167	5.65017	5.91055	5.84737	5.94687	5.86673	5.84848	5.66541	5.4637	6.1371	6.12624	6.10369	5.85431	5.76869	5.48175
2	euxassay_012900_14.jpg	XM_981551	434064	Gm5577	EG434064	7469				1	4.8196	4.98396	5.09443	5.27777	4.77541	5.07316	5.5454	5.58879	5.67603	5.84311	5.97469	5.80921	5.6502	5.00524	5.38255	5.27818	5.58913	5.27736	4.73966	5.10176	5.1177	5.26393	4.94979	5.19194	4.85327	5.08108	5.3118	5.53622	5.82457	5.49131	5.63372	5.59046	5.46034	5.59312	5.74789	5.7347	5.41897	5.56427	5.34044
2	euxassay_016008_11.jpg	XM_486849	434907	Gm5648	EG434907	7569				1	3.76216	3.71207	4.00614	4.04388	4.28222	4.5197	4.33348	6.21186	7.08936	7.36708	6.80106	6.4074	5.90363	6.36363	5.90452	5.75522	6.08962	5.95707	5.54677	4.99354	3.72107	3.70184	3.89918	4.03576	3.89918	4.45783	4.28634	4.80896	5.96778	6.67522	7.01095	6.31244	5.76361	6.27049	5.35995	5.54185	5.23215	6.24465	5.45193
2	euxassay_003287_11.jpg	NM_018882	14766	Gpr56	Cyt28|TM7LN4|TM7XN1	7469				1	6.25082	6.68552	7.03241	6.94326	7.14746	7.34949	7.17012	7.37887	7.30517	7.36416	7.28948	7.07732	7.06779	7.21639	7.34076	7.04764	6.98543	6.95345	7.10145	7.33059	6.41411	6.70019	6.77821	6.74771	6.85291	6.96707	7.28661	7.39137	7.24089	7.33248	7.33507	7.02971	7.16186	7.04023	7.26008	6.67584	6.85877	7.2862	7.07441
2	euxassay_008383_11.jpg	NM_010349	14806	Grik2	AW124492|Glur-6|Glur6|Glurbeta2	7536	marker			1	4.03222	4.93556	5.15764	4.33326	4.40941	4.95119	5.53543	4.53803	5.68365	5.70122	6.51	5.8619	5.04465	5.68946	5.69194	6.03429	5.99662	4.79501	4.4079	4.6983	3.86993	4.3038	4.96323	4.7682	4.9109	5.13272	5.27613	5.42534	5.70583	5.24392	6.02595	6.384	5.3444	5.63373	5.28315	5.17194	4.83037	4.67338	4.30299
2	euxassay_003501_11.jpg	NM_025768	66790	Grtp1	5430401C05Rik|C81211|Tbc1d6	7569				1	5.34736	5.2641	5.11249	5.19576	5.03719	5.10397	5.07494	5.22105	5.5184	5.21171	5.51607	5.44976	5.6683	5.57442	5.66461	5.43007	5.40001	5.39431	5.3511	4.92295	4.96888	5.43193	5.32068	5.26826	5.19867	5.18992	5.1536	5.36543	5.35568	5.74203	5.68916	5.67249	5.63857	5.45098	5.42261	5.73151	5.64392	5.41387	5.33663
2	euxassay_015904_14.jpg	NM_010344	14782	Gsr	AI325518|D8Ertd238e|Gr-1|Gr1	7569				1	4.22707	4.37456	3.79803	3.84526	4.40641	3.98342	4.28832	4.6192	4.80843	4.53988	4.6631	5.10785	4.0639	4.27181	4.71793	4.04784	3.96472	4.29513	4.16417	4.24388	4.14466	4.00188	3.64627	3.84898	4.07979	3.76697	3.86006	3.9089	4.25512	4.79406	4.99173	4.915	4.3694	4.61485	4.07123	4.20414	4.00488	3.94993	4.40968
2	euxassay_002074_11.jpg	NM_025652	66596	Gtf3a	2010015D03Rik|2610111I01Rik|5330403M05Rik	7469				1	5.42185	5.67875	5.6554	5.87506	6.20123	5.73882	5.7213	6.11228	6.03603	6.38527	6.09233	6.4081	6.67528	6.31855	6.196	6.27575	5.82603	5.93026	5.03008	5.02023	4.92503	4.86469	5.19209	5.84804	5.55805	5.45876	5.92129	6.52707	6.28667	6.12519	6.54057	6.03713	6.38431	6.34935	6.32716	5.85526	5.68749	5.43673	5.2867
2	euxassay_012454_11.jpg	NM_027901	71752	Gtf3c2	1300004C11Rik|2610510G03Rik|AI225816|AU041069|TFIIIC110|mKIAA0011	7569				1	4.61786	4.49325	5.0718	5.26224	5.14288	5.22905	5.31554	5.66374	6.12908	6.1548	6.28179	6.03116	6.30765	6.5318	6.34626	6.46472	5.88104	5.71041	5.82323	4.96319	4.06284	4.49325	4.775	5.3167	5.39932	5.49433	5.45937	5.61044	5.4872	5.55355	6.06946	6.03705	6.32903	6.24487	6.43552	6.16489	5.58076	6.08371	5.50042
2	euxassay_007269_14.jpg	NM_008206	15001	H2-Oa	H-2Oa	7557				1	4.87881	5.07295	5.53968	5.86372	5.47268	5.83793	6.12258	5.85069	6.20032	6.25261	6.12225	6.62601	6.84022	6.47073	6.54887	6.46006	6.38532	5.98323	6.71502	5.98955	4.57016	4.68144	5.63539	5.50833	5.56603	6.05806	5.75598	5.77826	6.13274	6.23569	6.12094	6.45854	7.11557	6.75564	6.80379	6.53486	6.08563	6.1946	6.08945
2	euxassay_002718_14.jpg	NM_010436	15270	H2afx	AW228881|H2A.X|H2ax|Hist5-2ax|gammaH2ax	7569				1	5.95469	5.62529	5.68793	6.15673	5.90181	5.63546	5.84637	6.68888	6.98358	6.81057	7.23015	6.96756	6.81688	6.53119	6.69575	7.12989	7.32646	7.19667	6.89918	6.88569	6.29705	5.7469	5.7469	5.93419	5.89668	6.09643	6.41868	7.01813	7.03427	6.77909	6.69049	7.14307	6.74248	6.34654	6.87714	6.36388	6.49838	6.42858	6.30688
2	euxassay_015944_14.jpg	NM_008212	15107	Hadh	AA409008|AU019341|AW742602|Hadhsc|Schad	7569				1	4.65692	4.46268	4.30294	4.76934	4.26509	4.69331	4.82921	4.93045	5.58378	5.39707	5.46542	5.68913	5.33726	5.92243	5.91978	6.02998	5.73951	4.89264	4.77462	4.72396	4.27671	4.7516	4.49147	4.54601	4.89856	4.5651	5.51954	5.28888	5.65486	5.70551	5.5811	5.51183	5.29624	5.98146	5.36553	5.14044	4.88886	4.67334	4.12879
2	euxassay_010402_11.jpg	NM_010404	15114	Hap1	HAP-1|MGC31449	7470				1	3.99612	4.05034	4.15902	3.86292	3.46593	3.87024	3.93281	4.02759	4.64779	4.2268	4.07529	4.23363	4.87071	5.10859	4.47763	4.21303	4.13854	4.55058	4.24213	4.02694	4.02431	3.24139	3.58648	3.73232	3.945	3.88659	4.30132	4.07116	4.26426	5.06902	4.95478	4.70606	4.63042	4.74842	4.42338	4.23873	4.60824	4.28552	4.04453
2	euxassay_000115_11.jpg	NM_026115	107435	Hat1	2410071B14Rik|AA536933|Hat-1|KAT1	7537				1	5.63894	5.68765	5.8985	5.90761	5.78156	5.83814	5.95438	5.97784	6.11714	6.77803	7.01646	7.01336	6.14402	6.74889	7.04314	6.84126	7.01057	6.67865	6.04917	5.54851	5.59849	5.83309	6.1031	6.00567	6.15036	5.646	5.85652	5.93983	5.7681	6.74097	7.02418	6.87429	7.0719	7.21774	6.87238	6.6289	6.34572	6.44243	5.73387
2	euxassay_001476_11.jpg	NM_146159	231123	Haus3	D4S43h|D5H4S43|D5H4S43E|MGC36997|MGC38108|MGC38583	7569				1	4.14916	4.69585	4.07773	4.38005	4.96068	5.48665	6.24304	6.62931	6.89901	6.6849	6.32644	6.89401	6.38543	6.17351	5.99233	5.38702	5.44275	4.76247	4.51854	4.61981	3.76889	3.78393	4.45401	4.44982	4.1006	4.82345	4.44141	4.94812	6.54574	6.35386	6.73692	6.64656	6.63991	5.95338	6.06054	5.30627	5.75126	5.03683	5.10673
2	euxassay_019477_11.jpg	NM_010419	15208	Hes5	bHLHb38	7569	marker			1	4.89528	4.82633	4.83422	5.00917	5.04311	5.22341	5.49803	5.886	6.27723	6.21645	6.70527	6.76974	6.50712	6.17918	6.48183	6.50712	6.32693	6.58895	6.65566	6.17869	4.80355	4.88067	4.92725	5.16384	5.03189	5.04117	5.70178	6.29429	6.34545	5.98144	6.60212	6.44898	6.2021	5.88913	6.91363	6.88333	6.51862	6.25739	6.1133
2	euxassay_012857_11.jpg	NM_020034	56702	Hist1h1b	H1.5|H1B|H1f5|H1s-3	7569				1	5.16597	4.47681	5.70431	5.25921	5.10739	5.93366	6.74399	6.78776	6.9525	6.4294	7.02497	6.52301	6.5846	6.71289	6.38168	5.94671	5.6827	6.64724	5.78509	6.66156	4.67089	4.56845	4.75471	4.66278	5.58296	5.8646	6.44131	6.81811	6.40961	6.89785	6.86824	6.36687	6.65998	6.47894	6.26702	6.08301	5.41797	5.51113	5.43536
2	euxassay_012858_11.jpg	NM_010377	107970	Hist1h1t	H1ft|H1t	7569				1	4.47372	4.33424	4.50918	4.50095	4.72457	4.97955	5.11677	5.66911	6.18604	6.76565	6.51181	6.59458	6.32882	6.36265	6.32349	6.09947	5.56121	4.91105	4.85215	4.1196	4.39192	4.39826	4.28222	4.4444	4.76738	4.54281	5.01303	5.65327	6.86526	6.99638	6.0983	6.69573	6.00819	5.22503	5.61345	5.32105	5.22073	4.48075	4.14399
2	euxassay_010527_11.jpg	NM_013549	15267	Hist2h2aa1	AI448581|H2a-615|Hist2	7569				1	6.25841	6.49272	4.58599	6.09675	5.8192	4.87858	5.24942	6.68144	6.6309	6.89798	6.99216	7.05354	6.79723	6.68487	6.41269	5.82882	5.80665	5.38755	5.48454	5.31209	5.55738	5.71471	4.66077	4.38967	4.61375	4.21338	5.68355	6.21627	6.87413	6.73359	6.90255	7.27794	7.23197	6.94532	7.14743	6.33936	6.08168	4.54537	4.91304
2	euxassay_003457_11.jpg	NM_016660	15361	Hmga1	AL023995|Hmga1a|Hmga1b|Hmgi|Hmgiy|Hmgy|MGC102580	7569		mouseTF		1	6.56114	6.66352	6.86371	6.94245	6.63832	6.45861	6.38764	6.21238	6.69666	6.81442	6.96854	7.31404	7.03042	6.78856	7.06985	7.10893	7.2189	6.65782	6.45606	6.40552	6.61419	6.99291	6.70483	6.96084	6.78478	6.53666	6.14693	6.37495	6.71387	6.90656	6.93146	7.0419	7.1515	7.02132	7.24281	6.99517	6.84347	6.4202	6.33738
2	euxassay_019251_11.jpg	XM_486109	97165	Hmgb2	C80539|HMG-2|Hmg2|MGC103184	7569				1	6.27569	6.27879	6.43269	6.57175	6.78953	6.49296	6.69934	7.00972	7.12273	7.27897	7.11774	7.36783	7.32628	7.07557	7.10894	7.04264	7.13266	7.22084	7.32509	7.15037	6.26981	6.09676	6.27982	6.24043	6.25625	6.21368	6.92039	7.00794	7.42846	7.24154	7.37113	7.25461	7.24556	7.22685	7.03116	6.86096	7.10102	7.08434	6.89449
2	euxassay_013902_11.jpg	XM_897083	432467	Hnrnph3	AA693301|AI666703|Hnrph3	7569				1	4.24612	3.88439	3.99409	4.1557	4.06164	4.40305	4.46605	4.33418	4.37724	4.30407	4.29754	4.56949	4.58006	4.65287	4.61038	4.553	4.63915	4.11531	4.16083	4.18747	4.15683	3.99409	4.16355	4.02272	4.24823	3.95715	4.04838	4.60263	4.47509	4.75139	5.09644	4.42746	4.30306	4.5299	4.51345	4.34564	4.79493	4.2062	4.1389
2	euxassay_010529_11.jpg	NM_175606	74318	Hopx	1110018K11Rik|1200015P04Rik|2300002F06Rik|AI848177|AW490897|Cameo|Hdop|Hod|Hop|Ob1|Obl|Toto	7569				1	4.1006	3.88194	3.94277	4.41267	4.08314	3.84097	4.14787	4.27159	3.98821	4.85149	4.60749	4.34442	4.73163	4.39319	4.26287	4.39064	4.32551	4.1119	4.14852	4.06957	4.02665	4.05034	4.15174	3.82005	4.26088	4.22092	3.87571	3.85529	4.01537	4.28927	4.17728	4.99124	4.83794	4.30904	4.09324	4.2061	4.76542	4.05678	4.36753
2	euxassay_011373_11.jpg	NM_008292	15488	Hsd17b4	17-beta-HSD|17[b]-HSD|4|DBP|MFE-2|MFP2|MPF-2|Mfp-2|perMFE-2	7569				1	5.30971	5.59283	5.4134	5.13369	5.61916	5.14709	4.90107	5.14823	5.5594	5.51715	5.34247	5.35035	5.42874	5.31253	5.74345	5.43523	5.17731	5.33157	5.16284	4.8876	4.84556	5.18306	5.61263	5.19273	4.97046	5.20582	5.16172	4.82535	5.23165	5.28915	5.18284	5.70709	5.64358	5.3776	5.77453	5.50219	5.70325	5.78693	5.50219
2	euxassay_000488_11.jpg	NM_008294	15495	Hsd3b4	-	7569				1	5.97887	6.02678	6.23512	6.28874	5.91042	5.9571	6.44022	6.46184	6.71748	7.18159	7.21218	6.45747	6.60045	6.57242	6.53315	6.58417	6.68264	6.73173	6.60045	6.88959	5.82242	5.93019	5.94023	6.0325	6.23548	6.35309	6.75418	6.91079	6.96774	6.86449	6.6565	6.70155	6.46257	6.63537	6.58082	6.39217	6.62794	6.67607	6.55753
2	euxassay_012664_14.jpg	NM_008316	15574	Hus1	mHus1	7569				1	3.65171	3.65171	3.65171	3.65171	3.67878	4.14528	4.0682	4.2513	4.23679	4.06136	4.55488	4.86097	4.71603	4.47886	4.76738	4.30441	4.16584	4.19364	4.12574	3.99947	3.71236	3.65171	3.65171	3.65171	3.6073	3.51817	4.15174	4.13098	4.12705	4.44247	4.54412	4.42658	4.18233	4.42445	4.56265	4.64	4.32741	4.21229	4.15945
2	euxassay_001939_11.jpg	NM_172015	105148	Iars	2510016L12Rik|AI327140|AU044614|E430001P04Rik|ILRS	7569				2	4.77195	5.02676	5.10336	5.06557	5.06077	5.02921	4.67802	4.73028	5.21115	5.61272	5.34535	5.42958	5.75159	5.66736	5.32949	5.26007	5.31546	5.15151	5.21977	5.20247	4.60744	4.90631	5.04872	4.85738	4.59423	4.62053	4.74829	4.57754	4.73028	5.08695	5.30739	5.53014	5.48432	5.21762	5.37075	5.36298	5.16274	5.03656	4.99443
2	euxassay_001939_14.jpg	NM_172015	105148	Iars	2510016L12Rik|AI327140|AU044614|E430001P04Rik|ILRS	7569				2	4.4998	4.63819	4.85033	4.97279	4.99809	5.10675	5.4489	5.75672	5.89514	5.95062	5.88161	5.87343	5.68998	5.61019	5.61673	5.66176	5.57026	5.58034	5.58034	5.45439	4.41968	4.73768	4.98043	5.05706	5.02787	5.12294	5.50292	5.82335	5.85416	5.68998	5.75376	5.75078	5.80913	5.75968	5.8652	5.6775	5.77147	5.62974	5.64584
2	euxassay_011601_11.jpg	NM_145360	319554	Idi1	4832416K17Rik|MGC118013|MGC8139	7569				1	5.04398	4.82054	4.5642	5.40264	5.24334	5.1615	5.12889	6.03834	5.9791	6.20623	5.62811	5.79041	5.72887	6.40091	5.8594	5.59532	5.73611	6.2071	5.4844	5.79561	4.68004	5.06711	4.74005	5.14257	4.98141	4.95375	5.3478	6.10972	6.26786	6.23546	6.95305	6.14548	6.38795	5.85276	6.16572	5.46076	5.65221	5.78096	4.80371
2	euxassay_011577_11.jpg	NM_025409	66191	Ier3ip1	1110057H19Rik|AI644142|AL022842|AL022863|AV026606	7469				1	5.31285	5.47011	5.5634	5.8261	5.90312	5.87813	5.99333	5.87745	5.86856	5.69532	5.99898	6.11742	6.14995	6.65279	6.402	6.28508	6.01642	5.91911	6.20151	5.8603	4.7581	4.9151	5.19789	5.7038	5.43033	5.50459	5.94406	6.01889	6.04036	6.14769	6.01889	5.94471	5.72744	5.83244	5.78308	6.08768	6.20586	5.97369	5.27132
2	euxassay_013772_11.jpg	NM_030244	72500	Ier5l	2610524G09Rik	7569				1	5.56314	5.76115	5.81567	5.71977	5.53091	5.68841	5.63005	5.77877	6.20623	6.67762	7.01608	7.38592	7.27417	7.30957	7.32324	7.07766	6.8697	6.49063	6.41638	6.6966	5.58144	5.56291	5.82239	5.80825	5.76351	5.7337	5.99527	6.22264	6.71228	7.35903	7.40118	7.45625	7.27955	6.93456	6.94994	6.41224	6.31452	6.38565	6.26869
2	euxassay_006667_14.jpg	NM_008332	15958	Ifit2	AV302338|Ifi54	7569				1	4.5451	4.49266	4.63063	4.50801	4.32017	4.26009	4.31077	4.49859	4.51153	4.7713	4.92519	5.17265	5.50526	5.0064	5.32238	4.88489	5.17931	4.46607	4.37321	4.3763	3.29409	4.37527	4.55764	4.67941	4.30132	4.31883	4.34009	4.64352	5.01551	4.99723	5.2357	5.21427	5.28656	5.40163	5.53898	5.51989	5.10051	4.9107	5.06711
2	euxassay_003205_11.jpg	NM_013562	15982	Ifrd1	Ifnl|PC4|Tis7	7569				1	5.21584	5.26907	4.87239	5.12032	5.4307	5.1847	5.51775	5.28443	5.24088	5.45596	5.9391	6.04034	5.46938	5.7063	5.6051	5.40463	5.8494	5.37789	5.10421	5.42405	4.73382	4.53876	5.01307	4.87239	5.23055	5.15801	5.09508	4.99091	4.75433	5.70015	6.22112	5.89546	6.02419	5.66688	5.38238	5.62202	5.20977	5.65791	5.53653
2	euxassay_002024_14.jpg	NM_026641	68259	Ift80	4921524P20Rik|Wdr56|mKIAA1374	7569				1	4.08179	4.28692	4.6354	4.41589	5.04633	4.52336	4.41911	4.63356	5.00486	6.21618	6.00707	5.46608	5.71437	5.66739	5.62903	5.49073	5.92615	5.00271	5.22349	5.49683	4.27751	3.59976	4.43189	4.67538	4.5819	4.38334	4.42765	4.86098	4.7029	5.35967	5.15445	5.5024	5.4653	5.33964	5.01634	5.40478	5.3606	5.19762	5.55042
2	euxassay_006157_11.jpg	NM_198610	230868	Igsf21	BC055811|Gm141|MGC67646	7539|7557				1	4.83732	5.2081	4.93801	3.87761	3.91847	3.91847	4.58555	5.13882	4.99341	4.91588	5.36492	4.90308	5.29069	5.0292	5.35006	4.48606	4.6107	4.30328	4.9711	4.77545	4.96495	4.79637	4.64698	4.00688	4.52278	4.87931	4.81585	5.52804	5.00044	5.06316	4.85071	4.46879	4.48319	5.45757	4.51999	5.2483	4.35119	4.19717	4.31299
2	euxassay_002218_14.jpg	NM_080419	140559	Igsf8	AA033172|AU041109|ESTM34|EWI-2|KCT-4|PGRL|R75384	7569				1	3.44541	3.91799	5.03974	5.05348	4.69453	5.60939	6.68631	6.55523	6.75049	6.79832	6.975	6.7495	5.96333	7.2962	6.91028	6.14154	7.01356	6.44915	5.81462	4.79032	4.43526	4.50633	5.03159	5.17086	5.10717	4.97155	5.16566	5.86591	6.99524	7.0503	7.15092	6.87726	6.81835	7.06474	6.85527	6.26097	6.0781	5.90344	5.26766
2	euxassay_012492_14.jpg	NM_177128	320299	Iqcb1	6820449I09Rik|AV128382|NPHP5	7569				1	4.49043	4.42903	4.96164	4.75158	4.90085	5.29308	5.18518	5.18076	5.21816	5.45532	5.44221	5.92727	5.48297	5.61857	5.46009	5.37058	5.31529	4.77755	4.59946	5.04689	4.83578	4.68013	5.12214	5.35873	5.33509	5.26774	5.47141	5.28311	5.56338	5.47295	5.90655	5.39237	5.71538	5.55171	5.52361	5.18842	5.09146	5.04041	4.67879
2	euxassay_013405_11.jpg	AK042038	544963	Iqgap2	4933417J23Rik|A630053O10|AI788777	7569				1	3.62597	3.99713	3.74791	3.8291	3.73352	4.22337	3.93351	4.47475	3.97895	3.91874	4.20088	3.99914	4.29698	5.00057	4.65735	4.77326	4.39013	4.29534	3.65807	3.88116	3.98908	4.07338	3.77158	4.20957	3.86475	4.15483	4.19214	4.25057	4.2888	4.31158	4.15663	4.09793	4.13307	5.04979	4.79305	4.46897	4.53476	4.63494	3.92667
2	euxassay_015937_14.jpg	NM_177663	229504	Isg20l2	4930429N24|C80587	7569				1	4.92238	4.81143	5.14891	5.42892	5.47073	5.41246	5.40188	5.48726	5.35956	6.1018	6.14955	6.02265	6.18082	6.32055	6.19095	5.99401	5.94996	5.94801	5.98518	5.19689	5.24207	4.92765	4.95271	5.33037	5.57058	5.66206	5.54265	5.36268	5.59863	5.46856	6.11343	6.30968	6.08348	5.98922	6.15676	6.28933	5.78344	5.7576	5.69523
2	euxassay_004331_11.jpg	NM_010591	16476	Jun	AP-1|Junc|c-jun	7569		mouseTF		1	4.71519	4.61315	4.35233	4.18616	4.29632	4.33863	4.29982	5.11438	5.14339	5.5936	5.40029	4.92773	5.5515	5.21059	5.40786	5.40912	5.39839	5.11515	5.51866	5.56285	4.53579	4.39686	4.22464	4.16334	4.316	4.43194	4.26411	4.88226	5.66485	6.63059	6.05391	5.50461	5.04162	5.53142	5.51574	5.15768	5.44759	5.53719	4.88895
2	euxassay_012273_14.jpg	NM_001038010	14534	Kat2a	1110051E14Rik|AW212720|Gcn5|Gcn5l2|mmGCN5	7569		mouseTF		1	4.47809	4.83557	4.49951	4.71624	4.78646	5.39528	5.29064	5.0421	5.01509	5.15438	5.21498	5.35276	5.04331	5.33897	5.6033	5.35276	5.09816	4.80178	5.06143	4.7205	4.60734	4.64114	4.83557	4.60471	4.75831	4.90677	5.05975	5.27313	5.29269	5.90763	5.60248	5.22036	5.12137	5.09112	5.33798	4.98503	4.5818	4.88415	4.91503
2	euxassay_011123_14.jpg	NM_019697	16508	Kcnd2	AI839615|AW555701|Kv4.2|R75121|mKIAA1044	7557				1	5.25051	4.79363	4.91549	5.19398	4.85677	5.43783	5.06743	5.51347	5.33964	5.66121	5.61508	5.58601	5.49297	5.30302	5.33276	4.95582	4.962	5.10766	4.86962	4.54098	4.55309	5.34819	4.83259	4.85677	4.74763	4.71239	4.76247	5.38702	5.50007	5.63908	5.48512	5.24756	5.96736	5.25094	4.94441	5.27183	5.2768	5.05269	5.04495
2	euxassay_004675_14.jpg	NM_009004	19348	Kif20a	AA415432|Rab6kifl	7569				1	5.33623	5.09224	5.23771	5.14043	5.46001	6.34299	6.58642	6.26533	6.85721	5.8188	6.59876	6.14849	6.20235	6.62591	5.81677	5.70312	5.95866	5.55122	6.00919	6.45885	5.21384	5.37654	5.21492	5.27722	4.8834	5.12419	6.69002	5.99645	6.46336	6.3489	6.36649	5.84692	6.36121	6.50858	6.39262	6.27778	6.44165	6.07362	6.24071
2	euxassay_012905_14.jpg	NM_016705	16564	Kif21a	AI850764|mKIAA1708	7569				1	3.40166	3.40166	3.40166	3.40166	3.68116	3.54588	3.77001	4.04064	4.12268	4.07433	4.36882	4.58794	4.22765	3.87935	4.28085	4.38042	4.05034	4.75061	3.62857	3.57845	3.40166	3.40166	3.34494	3.539	3.5367	3.8902	3.57979	3.82572	3.64531	3.8902	4.15153	4.10104	4.06191	4.47475	4.28551	4.30186	3.92086	4.19914	4.59105
2	euxassay_006188_11.jpg	NM_024245	71819	Kif23	3110001D19Rik|C87313|CHO1|Knsl5|MKLP-1|MKLP1	7569				1	4.11995	4.29348	4.40739	4.49885	4.44468	4.14735	5.19852	5.51126	5.10497	5.67473	6.04193	5.86758	5.20939	4.89069	5.24223	4.91214	5.13531	5.31114	4.91569	5.53277	4.08023	4.19627	4.06595	4.41304	4.19627	4.20715	4.58986	5.64941	5.8826	5.61711	4.86479	5.47658	6.22611	5.81088	5.89141	5.03946	4.89069	5.64594	6.17138
2	euxassay_003601_11.jpg	NM_134471	73804	Kif2c	4930402F02Rik|ESTM5|Knsl6|MCAK|MGC11883|X83316	7470|7569				1	5.54282	5.43949	5.31549	5.5411	5.41377	5.42427	5.40548	5.77863	6.6158	7.11902	7.35683	7.14099	6.97965	7.125	6.56828	6.44011	6.99983	7.14144	7.16218	6.00965	5.56048	5.22838	5.50626	5.23478	5.22095	5.29304	5.55617	6.40384	7.39219	7.28465	7.02047	7.05415	7.10371	7.00857	6.19566	6.72862	6.02302	6.77912	7.15972
2	euxassay_010691_11.jpg	NM_053173	16580	Kifc5b	Hset|KNSL2|Kifc5a|MGC76666	7569				1	4.85169	4.21368	4.02349	4.16966	4.12705	4.19864	4.1401	4.43825	5.66423	4.77493	6.35861	5.4841	5.33379	5.55692	4.60937	5.45516	5.57673	4.65007	4.93246	5.07243	4.19192	4.11653	4.30977	4.20502	4.27189	3.75878	4.11256	5.07311	5.40523	5.10673	5.51196	5.86617	5.77041	4.50633	5.65289	4.51537	5.79206	4.71516	4.82345
2	euxassay_000441_11.jpg	NM_008484	16780	Lamb3	-	7569				1	6.08088	5.78877	5.66259	5.75057	5.65995	6.0437	6.89892	6.92268	7.14773	6.90829	6.55961	6.91349	6.03989	5.94056	6.0433	6.19891	6.41532	6.11767	6.27167	6.00537	5.99343	5.91723	5.72656	5.67467	5.99133	5.84191	6.31734	6.994	7.29535	7.02078	6.79232	6.46443	6.34489	6.11026	6.36058	6.19934	6.21367	6.10282	6.20934
2	euxassay_002166_11.jpg	NM_024434	66988	Lap3	2410015L10Rik|AA410100|LAP-3|Lap|Lapep|Pep-7|Pep-S|Pep7|Peps	7569				1	4.00555	4.26099	4.09081	4.17308	4.1516	4.48797	5.30725	4.77672	4.9617	5.67777	5.60636	6.29095	5.6541	6.15584	5.53383	4.89188	5.09665	5.00852	5.59646	5.45013	4.19426	4.31836	4.32157	3.98545	4.18899	4.39045	4.61507	5.39444	5.71502	5.1554	5.93325	5.12173	5.35738	5.10483	4.77086	5.54674	5.70492	6.00614	5.38928
2	euxassay_012425_14.jpg	NM_010715	16881	Lig1	AL033288|LigI	7569				1	5.07506	5.07845	4.55864	4.597	4.829	4.9432	5.30668	5.17901	5.72099	5.78296	6.6604	6.3373	6.84649	6.20522	6.0047	5.41834	4.66221	4.6463	4.78164	4.9553	5.18238	4.76222	4.59526	4.4291	4.48027	4.5239	4.8829	5.1893	5.96291	6.17374	6.09032	6.60796	6.35765	6.24345	6.15173	5.82786	5.51207	5.65359	4.47067
2	euxassay_003410_11.jpg	NM_026148	110829	Lims1	2310016J22Rik|4921524A02Rik|AI507642|AU021743|AW551584|C430041B13Rik|Lims1l|PINCH|PINCH1	7569				1	5.63481	5.25629	5.53393	5.58825	5.6406	5.57889	5.79524	5.53463	6.23306	6.51182	6.45128	6.46677	6.64191	6.51926	6.11209	6.16331	6.07215	6.08814	5.91099	5.68506	5.18933	5.38615	5.41348	5.24111	5.4652	5.66861	5.50175	5.8306	6.15648	6.1739	6.30578	6.35753	6.15827	6.3586	6.75754	6.5555	6.64712	6.21763	6.16945
2	euxassay_006443_14.jpg	NM_175186	72568	Lin9	2700022J23Rik|AA537062|AA545216|Bara|TGS|TGS1	7569				1	4.66007	4.20858	4.33424	4.67269	4.49215	4.56845	4.52435	4.49317	4.57615	5.06081	5.53684	5.01126	4.77827	4.94886	5.11336	5.00128	4.92192	4.85069	4.62801	4.6455	4.67717	4.59333	4.62801	4.58477	4.15303	4.45713	4.63079	4.49622	4.82103	5.148	5.67368	5.38893	4.69585	4.73421	4.95331	4.83554	4.83714	5.18876	4.82978
2	euxassay_004926_14.jpg	NM_010720	16891	Lipg	3110013K01Rik|EL|lipase|mEDL	7569				1	4.12114	4.45662	4.89678	5.06424	4.85861	4.88868	5.0927	5.14347	5.45254	5.69925	5.78606	5.80911	5.7641	5.6281	5.43967	5.358	5.23144	5.15252	4.9418	4.81372	4.16201	4.60561	4.67941	4.8194	4.89408	4.95994	4.99052	5.17266	5.63457	5.87341	6.03615	6.05676	5.94931	5.77439	5.66016	5.43227	5.27349	5.13437	4.99806
2	euxassay_002078_11.jpg	NM_144799	30937	Lmcd1	AW455500|AW553074|MGC29184|dyxin	7569				2	4.11942	3.69521	4.0305	4.18169	4.24647	4.16392	4.35815	4.64274	5.9237	6.27058	6.04276	5.75066	5.55741	5.43399	5.26711	5.32723	5.35492	5.27437	5.47781	4.95718	3.94514	4.15944	4.15584	4.22947	4.2848	4.13227	5.25393	5.96213	5.94727	5.76252	5.77281	5.67031	5.82465	5.91176	5.0748	5.00788	5.2011	5.04961	5.13876
2	euxassay_015910_14.jpg	NM_010721	16906	Lmnb1	-	7569				1	5.25262	5.54746	5.98163	5.58801	5.41095	5.86766	6.98377	6.31412	6.4917	6.05435	7.20437	6.95383	6.56057	6.862	6.94462	7.06593	7.15157	7.15551	6.28409	6.47143	5.58334	5.93942	5.8349	5.76174	6.05869	5.91837	6.98504	7.08406	6.97328	6.98028	6.40157	6.48983	6.5864	6.66077	6.37139	6.38344	6.53935	6.40488	6.33562
2	euxassay_000195_11.jpg	NM_022654	57913	Lrdd	1200011D09Rik|AU042446|Pidd	7536				2	5.69139	5.10654	5.2184	5.48007	5.03907	4.90532	4.98239	4.94124	5.36187	5.36109	5.74687	5.74508	5.56514	5.74567	5.75994	5.3375	5.19773	4.91916	4.98239	4.8497	5.27608	4.85377	5.27332	5.31834	4.94853	5.06516	5.10762	5.2718	5.58331	5.81736	5.82699	5.85883	5.81906	5.90075	5.50852	5.20731	5.05362	4.87614	4.60687
2	euxassay_000195_14.jpg	NM_022654	57913	Lrdd	1200011D09Rik|AU042446|Pidd	7470				2	5.1383	5.32516	4.89782	5.17337	5.15009	5.29676	5.35197	5.08357	5.23851	5.57483	5.60873	5.39603	5.50312	5.92382	5.90468	5.60214	5.32343	5.20414	4.90248	4.81407	4.84209	4.9271	5.10686	4.93411	5.11382	5.08262	5.08892	5.55519	5.42319	5.7929	5.46733	5.68673	5.42915	5.43731	5.63089	5.70467	5.49461	5.2154	4.9695
2	euxassay_013970_14.jpg	XM_909085	14725	Lrp2	AI315343|AW536255|D230004K18Rik|Gp330|Megalin	7569				1	4.86632	4.96816	5.02539	5.02441	4.87181	5.01452	5.18284	5.08139	5.31435	5.15522	5.28258	5.37045	5.50149	5.28176	5.15702	5.30546	5.14075	4.95064	5.0303	5.16329	5.4252	4.79767	4.81941	4.95168	4.79305	5.11415	4.9192	4.96919	5.10394	5.23315	5.24164	5.73611	5.36812	5.08517	5.34149	5.55156	5.66775	5.30465	5.25178
2	euxassay_000278_14.jpg	NM_008516	16979	Lrrn1	2810047E21Rik|NLRR-1	7569				1	4.9452	4.99028	4.94936	4.84279	4.97405	5.26164	5.36483	5.5231	5.48244	5.35311	5.22504	5.22074	5.60607	5.93825	5.8486	5.53956	5.4976	5.96223	5.22074	4.83916	4.44821	4.92107	5.02294	5.04374	5.14008	5.18042	5.14235	5.3254	5.61917	5.78388	5.57446	6.23546	5.49049	5.64423	5.71001	5.81767	5.73054	5.48065	5.55754
2	euxassay_015911_14.jpg	NM_010733	16981	Lrrn3	NLRR-3	7557				1	4.12933	4.42049	4.43127	4.91432	4.90662	4.17047	4.51155	5.52523	4.44462	4.85786	5.15021	5.19521	4.7805	4.90276	5.21368	4.85578	5.66408	4.8058	4.54417	4.10715	3.24238	4.69601	5.21308	4.52399	4.25778	4.22005	4.12628	4.5994	4.54015	5.1013	4.79621	4.74798	5.21206	5.16648	5.18202	5.09441	4.43631	4.8675	4.5094
2	euxassay_011132_11.jpg	NM_008520	16998	Ltbp3	Ltbp2|mFLJ00070	7540				1	5.01577	5.26456	5.36988	5.56263	5.85954	5.68981	5.58418	6.00541	6.20678	6.09818	5.62178	5.38146	5.70495	6.11771	6.44748	6.66093	6.10087	6.22981	6.41732	6.20014	5.00083	5.19712	4.77473	4.94364	5.37606	5.70157	5.8084	6.26796	6.2638	6.37352	6.15923	6.32136	5.95346	5.54334	5.90211	6.06899	6.22446	6.26307	6.0684
2	euxassay_009158_11.jpg	NM_008564	17216	Mcm2	AA959861|AW476101|BM28|CDCL1|Mcmd2|mKIAA0030	7469|7569				2	4.65439	4.89067	4.97396	4.61568	4.97804	5.22346	5.7455	6.12343	6.47942	6.42113	6.81143	6.89434	6.90642	6.18465	6.22207	6.09557	5.8257	4.96064	5.19311	5.09334	4.44465	4.76661	4.73485	4.88562	5.37097	5.34518	5.79715	6.59403	6.61871	7.11992	6.79333	6.84472	6.86164	7.01749	6.97581	6.73343	6.09698	5.76686	5.27818
2	euxassay_009158_14.jpg	NM_008564	17216	Mcm2	AA959861|AW476101|BM28|CDCL1|Mcmd2|mKIAA0030	7469|7569				2	4.52642	4.73643	4.89658	5.19382	5.23271	5.41408	6.03443	6.74333	6.94131	7.1404	6.97164	6.90744	6.85463	6.95085	6.68038	6.75649	6.32941	5.91332	5.96726	5.62518	4.63824	4.63547	4.80889	5.07792	5.12396	5.24725	5.65747	6.44028	6.63095	6.83025	7.13449	7.08677	7.22605	6.87161	7.01855	6.70518	6.7062	6.29716	5.99224
2	euxassay_001694_14.jpg	NM_008563	17215	Mcm3	AL033361|C80350|Mcmd|P1|p1.m	7569				2	5.21902	4.89822	5.62736	4.58195	4.85641	4.72418	5.97103	5.97018	6.10515	6.69098	6.84207	6.98052	7.29109	7.35574	6.69325	6.61365	6.54183	5.85175	5.40958	5.82993	5.11648	4.84716	4.57412	4.76209	4.60957	4.84716	5.07665	5.28149	5.59013	5.90925	6.90896	7.16366	6.85459	6.45423	6.37494	6.46625	5.98628	6.03011	5.24687
2	euxassay_000524_11.jpg	NM_019434	54387	Mcm3ap	GANP|mKIAA0572	7569				1	4.55979	4.77316	4.95728	5.25044	5.32765	5.14642	5.50579	6.05351	5.77824	5.79036	5.90135	5.8541	5.70587	6.03488	5.93798	5.46173	5.45004	5.31321	5.54786	5.63107	5.12602	4.61519	4.95347	5.11879	5.3844	5.42538	5.36573	5.45918	5.85687	5.83457	5.91868	5.88968	6.04665	5.16292	5.47728	5.60518	5.7947	5.89283	5.36896
2	euxassay_006813_14.jpg	NM_199147	71567	Mcm9	9030408O17Rik|Gm235|MGC70158|Mcmdc1	7569				1	4.5565	4.72457	5.23655	4.962	5.08422	4.73404	5.08894	5.39199	5.55088	5.40264	5.50925	5.70817	5.43412	5.1362	5.37972	5.36346	5.4951	5.29161	5.39351	5.03129	4.81751	4.75853	4.56443	4.85953	4.4412	4.73283	5.00955	5.22973	5.12154	5.4801	5.271	5.21944	5.7337	5.4252	5.59996	5.44373	5.3087	5.04495	5.09364
2	euxassay_014183_14.jpg	XM_992110	240087	Mdc1	6820401C03|AA413496|Nfbd1|mKIAA0170	7569				1	4.42836	4.61981	4.40079	4.45905	4.30132	4.53592	4.47235	4.66579	5.22288	5.34543	5.20648	5.29488	5.00557	5.05848	4.73645	4.76503	4.75793	4.32604	4.33083	3.98705	4.49503	4.25029	4.47235	4.51504	4.61436	4.41589	4.23902	4.72154	4.876	5.3317	5.5399	5.16597	5.29733	5.07284	4.93606	4.9192	4.61611	4.53546	4.50331
2	euxassay_000525_14.jpg	NM_001012336	17242	Mdk	MK|Mek	7569				1	6.20282	5.91651	5.40604	5.29202	5.23215	5.68634	6.1417	6.92245	7.17405	6.89659	6.93927	6.78995	6.72476	6.69784	6.77422	6.95976	6.79775	6.729	6.20362	5.88132	5.38203	5.33753	5.03129	5.18108	5.37045	5.85995	6.29587	6.46691	6.77305	7.07932	6.4611	6.80637	6.48635	6.74343	6.77568	6.53798	6.69907	6.52967	6.37912
2	euxassay_007082_11.jpg	NM_010790	17279	Melk	AI327312|MPK38|mKIAA0175	7569				1	4.97123	5.01055	5.18988	5.52674	6.09947	6.05242	5.97706	6.60439	6.74821	7.01211	6.7193	6.8138	7.00614	7.0421	6.48778	6.2431	6.06205	5.88091	6.03492	5.95707	4.95478	4.95375	5.39884	6.07209	5.80309	5.75404	6.04661	6.27822	6.80895	6.83614	6.55034	6.37757	6.34047	6.66346	6.75268	6.64179	6.35111	6.30249	5.98897
2	euxassay_005079_11.jpg	NM_023403	67943	Mesdc2	2210015O11Rik|AW537813|MGC25959|mKIAA0081|mesd|msd	7569				1	4.69641	4.50731	4.38988	4.74205	4.77755	4.58172	4.88724	5.07807	5.38242	5.51172	5.8074	5.60029	5.76852	5.89943	5.26643	5.50679	5.556	5.3403	5.43153	5.63683	4.29372	4.57501	4.53523	4.57052	4.84882	4.86541	4.89175	5.28203	5.44361	5.73801	5.64016	5.68135	5.44238	5.57999	5.64647	5.44042	5.76676	5.66933	5.01502
2	euxassay_004928_11.jpg	NM_008595	17305	Mfng	AW546563	7569				1	4.48038	4.48754	4.51585	4.67491	4.99446	6.02949	6.80864	6.99045	6.94888	6.86129	6.90942	6.9835	7.01977	6.88928	6.99736	7.01977	6.97333	6.84535	6.76803	6.42234	4.30091	4.43663	4.67805	4.65278	5.43517	6.37484	6.95665	6.95147	6.79065	6.90274	6.9014	7.10608	7.03574	7.15189	7.12916	7.07312	6.94107	6.60634	6.57809
2	euxassay_001008_11.jpg	NM_019946	56615	Mgst1	1500002K10Rik|Gst	7569				1	4.25012	4.38411	4.58892	4.46011	4.59114	4.57442	4.72546	5.00796	4.76137	4.79294	5.22965	4.97215	5.3223	4.94222	5.02529	5.1461	5.01343	5.47499	4.82383	4.77197	4.71023	4.58336	4.40821	4.41574	4.71125	4.61968	4.6175	4.71125	4.63158	4.71431	4.82496	5.17995	5.15017	5.24339	5.33162	5.17108	4.80598	5.12895	4.87862
2	euxassay_013905_11.jpg	NM_144860	225164	Mib1	DIP-1|E430019M12Rik|MGC18948|Mib|mKIAA1323	7569	marker			1	3.73099	4.50606	4.32596	4.2008	4.35199	4.55169	4.39071	4.42203	4.60159	4.85128	5.36564	4.66976	4.70983	4.86549	4.77275	4.61925	4.62467	4.84611	5.09699	4.42149	3.82286	4.20204	4.34637	4.15011	4.1175	4.4631	4.67425	4.53005	4.64342	5.0385	4.83612	4.81513	4.3328	4.8481	5.22537	5.18114	5.30592	4.82459	4.55705
2	euxassay_012340_14.jpg	NM_022323	64113	Moap1	AA987038|MAP-1|PNMA4	7469				1	4.95907	5.23143	5.51813	5.18224	5.19834	5.49225	5.15175	5.26308	5.33368	5.70591	6.04061	5.57472	6.01481	5.68633	5.56177	5.6612	5.33434	5.75373	4.95304	4.65902	5.254	5.42854	5.69047	5.08955	5.22787	5.2838	5.52104	5.03437	5.47553	5.74379	5.78362	5.6351	5.91252	5.90407	5.70795	5.23852	4.94439	5.46408	5.43658
2	euxassay_003941_11.jpg	NM_026759	68537	Mrpl13	1110002D09Rik	7569				1	4.57377	5.10191	4.88715	5.65648	5.83663	5.85549	5.15502	5.51141	5.56512	5.9325	6.03069	6.69728	6.45831	6.50293	6.34906	6.11735	6.83604	6.25084	6.11636	5.65148	5.28581	5.5476	5.17163	5.37735	5.27815	5.3286	5.86926	5.73253	6.35103	6.39414	6.10643	6.27677	6.4179	5.57283	5.7611	6.19594	6.64191	6.62766	5.94804
2	euxassay_003371_14.jpg	NM_024227	68611	Mrpl28	1110015G04Rik|L28mt|MAAT1|MGC8184|MRP-L28|p15	7569				1	4.50683	4.41664	4.64009	4.70544	4.95219	5.20951	5.0628	5.31152	5.68436	5.56076	5.53903	5.20712	5.64854	5.70187	5.56889	5.40263	5.39599	5.29855	5.01353	4.88515	4.67439	4.68689	4.79131	5.06854	5.18416	5.27058	5.43226	5.59764	5.50749	5.65157	5.48726	5.3652	5.41302	5.45291	5.38356	5.2739	5.22652	5.15296	4.89327
2	euxassay_001482_14.jpg	NM_021556	59054	Mrps30	2610020A16Rik|AA968347|PAP|Pdcd9	7569				2	5.60353	5.64759	5.68368	6.36345	6.31854	6.5096	6.42364	6.54804	6.08448	6.13944	6.9008	6.92286	6.94533	7.09521	6.60561	6.91378	6.67739	6.65938	6.0196	6.47036	5.00307	4.78493	5.43696	5.90886	6.07432	6.32026	6.32226	6.25789	6.13097	6.20703	6.3399	6.89446	6.50355	6.76042	6.87606	6.72276	6.72514	6.93414	5.92289
2	euxassay_005329_14.jpg	NM_134092	105837	Mtbp	AI429604|MDM2BP	7569				1	3.79926	4.25642	4.30472	4.4438	4.18771	4.38364	5.30642	5.90577	6.24644	5.98286	5.71129	6.45036	6.54752	6.28889	6.3442	6.39429	5.6657	5.24173	5.08368	5.07578	3.69879	4.00865	4.07129	4.58024	4.34585	4.70314	5.11089	4.93939	6.14848	6.28189	6.64799	6.73934	6.73225	6.05937	6.03636	5.99883	5.2389	5.36353	5.09076
2	euxassay_002080_11.jpg	NM_172308	270685	Mthfd1l	2410004L15Rik|AI647056|Fthfsdc1	7569				1	4.24948	3.4475	3.91596	3.84151	3.84523	3.74318	3.87649	3.88736	4.34854	5.91449	6.01127	5.84228	5.55067	5.57833	4.96972	5.08755	4.75895	4.46804	4.69024	4.07564	4.85808	4.55698	4.23253	3.9195	4.18632	4.08291	3.81328	4.10481	4.8283	5.04529	5.88269	5.82448	5.30115	5.73049	4.69231	4.47406	4.67777	3.99349	4.03906
2	euxassay_012297_14.jpg	NM_172742	233315	Mtmr10	BB128963|C79734	7569				1	4.17981	4.59404	4.32484	4.64778	4.37785	4.37205	4.80944	5.06743	5.15552	5.53322	4.9075	5.06424	4.95823	4.94094	5.39402	4.85307	5.0927	4.88054	5.01055	4.8061	4.18422	4.15977	4.21044	4.37399	4.33481	4.40079	4.56725	4.79074	4.94701	4.9146	4.88597	5.21283	5.16597	4.97531	4.61218	4.84566	4.71545	4.9496	4.35714
2	euxassay_009198_11.jpg	NM_013605	17829	Muc1	CD227|EMA|Muc-1	7569				1	4.2923	4.84693	4.09381	4.46192	4.08282	4.27915	4.24236	4.34689	4.60184	4.84544	5.28598	4.49926	5.24176	5.00969	4.65243	5.24007	4.53703	4.6306	4.30046	4.52036	4.22103	4.20228	4.06377	4.08911	4.33397	4.14303	4.17296	4.31664	4.76086	4.90337	4.7648	4.72696	5.19176	4.94975	5.23412	4.94455	4.87086	4.35161	4.52176
2	euxassay_005157_14.jpg	NM_023431	68114	Mum1	2610019J09|9430059D04Rik|UBE-1C2	7569				1	4.41443	4.19943	4.26641	4.38951	4.62767	4.90033	4.95931	5.04515	5.64061	6.01369	5.19562	5.6932	5.45636	6.0395	4.82343	4.70857	4.84404	4.4398	4.25486	4.35747	4.32699	4.43892	4.52	4.86069	4.46818	4.72353	4.79951	5.46226	5.64222	4.8319	5.05322	5.18758	5.24154	5.13609	4.62117	4.63199	4.40743	4.35747	4.07632
2	euxassay_006300_14.jpg	NM_016662	17121	Mxd3	4631412E13Rik|Mad3|bHLHc13	7569		mouseTF		1	4.59681	5.17783	4.80227	5.49936	5.41321	5.84998	5.65317	5.75344	5.61574	6.10274	6.79111	6.62597	6.59082	7.07624	6.25027	5.94203	5.80596	5.76999	5.71673	5.82588	5.0039	5.25821	5.2193	5.35865	5.42979	5.45802	5.79955	5.92928	6.40614	6.4962	7.17838	7.14006	7.13759	6.48563	6.24267	5.93051	5.91199	5.65062	5.55293
2	euxassay_000945_14.jpg	NM_008652	17865	Mybl2	B-Myb|Bmyb	7569		mouseTF		1	4.8542	4.66317	4.39147	4.7363	4.68885	4.61008	4.84387	4.78016	4.77626	5.2393	5.90143	6.59488	6.09716	6.61737	6.40207	6.07514	5.45686	5.38323	5.23788	4.26992	4.40216	4.33888	5.0271	4.83641	4.75663	4.41474	4.81948	4.99729	5.79237	5.87518	6.0235	5.96825	6.00565	6.15304	5.97489	5.50765	5.41	5.8587	5.40622
2	euxassay_006192_11.jpg	NM_010863	17912	Myo1b	AA406997|myosin-1b	7569				1	3.44017	3.97664	4.39755	4.12838	4.33538	4.52519	4.63357	4.76613	5.10108	5.08464	5.44626	5.59351	5.36042	5.35194	5.05761	5.17393	5.13948	5.12577	4.78757	4.67494	3.70362	4.06548	4.1633	4.34217	5.26459	4.5402	4.47322	4.89024	4.94504	4.89563	5.98084	5.83355	5.2191	5.16428	5.08069	5.43704	5.19815	4.92495	4.33841
2	euxassay_013748_11.jpg	XM_485604	54392	Ncapg	5730507H05Rik|Hcapg|MFT.M05.13|MGC169458	7569				1	4.91814	4.60693	4.34825	4.32123	4.65098	5.45034	5.78096	6.33958	6.72885	6.82883	6.68512	6.27222	5.81339	6.12266	5.93038	6.00964	5.80696	5.43598	4.69187	4.69806	4.41589	4.53684	4.71708	4.61872	4.62653	4.79421	5.67357	6.30096	6.46237	6.29485	6.75134	6.55521	6.43993	6.27997	5.95514	5.291	5.25157	5.02662	4.52783
2	euxassay_002384_11.jpg	NM_133762	76044	Ncapg2	5830426I05Rik|Luzp5|Mtb|mCAP-G2	7569				1	3.61147	3.40166	3.40166	3.40166	3.45135	4.00225	4.47955	4.93454	5.19154	5.16994	4.65027	4.93279	4.60048	4.0948	4.19545	4.42753	4.32462	3.92535	3.97717	3.88794	3.40166	3.40166	3.40166	3.40166	3.48515	3.65877	3.90929	4.61291	5.03031	5.35946	4.57231	4.48284	4.84333	4.79363	4.50419	4.23193	4.3047	4.55451	3.82571
2	euxassay_002558_14.jpg	NM_144818	215387	Ncaph	A730011O11Rik|Brrn1|HCAP-H|MGC38424|mKIAA0074	7569				1	5.41992	4.32338	4.2676	4.7969	4.70156	4.44244	4.41765	5.80835	5.72443	6.12626	6.64602	6.74124	6.63262	6.59911	6.32363	5.69069	6.23631	6.88266	6.11127	6.03183	4.38587	4.5884	4.92818	4.68918	4.52134	5.19792	5.76626	5.71886	5.33859	6.04888	6.95615	6.65187	6.9098	6.37764	6.48235	6.05049	6.20333	6.04726	6.3109
2	euxassay_010581_14.jpg	NM_013864	29811	Ndrg2	AI182517|AU040374|Ndr2|SYLD	7569				1	3.96464	4.26398	4.64587	4.54235	4.728	4.72558	4.90963	5.05848	5.45034	5.37045	5.90506	5.46856	5.12797	5.57865	5.5029	5.62486	5.18703	5.7448	5.31636	5.6077	4.22851	4.24382	4.52575	4.52296	4.8575	4.52992	5.12614	5.63715	5.48583	5.82418	5.99677	6.08017	5.95552	5.29651	5.40415	5.24841	6.10646	5.40888	5.60441
2	euxassay_015933_11.jpg	NM_008682	17997	Nedd1	-	7569				1	3.47116	4.31924	4.12425	4.19347	4.0721	4.1451	4.18468	4.19222	4.51723	4.6833	4.8781	4.89128	4.81034	4.63158	4.95382	4.63481	4.40064	4.24026	4.0646	3.88276	3.4143	3.66054	3.93659	4.13471	3.8263	4.05705	4.20965	4.30077	4.21459	5.026	4.77146	4.84979	5.155	4.87888	4.8648	4.47461	4.48487	4.72978	4.32382
2	euxassay_006351_11.jpg	NM_017464	18003	Nedd9	Cas-L|CasL|E230025G09Rik|HEF1	7569				2	4.29744	4.64367	4.73936	4.59996	4.96068	5.06218	5.3178	5.7353	6.20464	6.67992	6.5896	6.61271	6.43607	6.29008	6.1364	6.29621	6.42989	6.01275	5.47914	4.75259	4.58477	4.69761	4.86412	4.97701	5.02703	5.1412	5.26518	5.90318	6.08852	6.63412	6.9924	6.64484	6.50182	6.68148	6.6515	6.49087	6.17092	5.82711	5.40352
2	euxassay_006351_14.jpg	NM_017464	18003	Nedd9	Cas-L|CasL|E230025G09Rik|HEF1	7569				2	4.4338	4.54785	4.87618	4.91389	5.00257	5.3399	5.88241	6.2084	6.82346	6.47774	6.89686	6.54966	6.3796	6.54537	6.82565	5.97757	6.32416	6.39539	5.9092	6.2151	4.14218	4.71951	4.62782	4.71829	4.74125	5.01849	5.92419	6.12679	6.43057	7.03234	6.70983	6.72112	6.53175	7.0926	6.72279	6.54752	6.28358	5.85899	6.49872
2	euxassay_019457_14.jpg	NM_007501	11923	Neurod4	AI846749|ATH-3|Atoh3|MATH-3|Math3|bHLHa4	7569				1	5.33619	5.51459	5.58784	5.46101	5.49746	5.70792	5.70148	5.79443	6.44816	7.14183	7.1031	7.07524	6.97431	7.10795	7.08058	7.25144	6.56592	5.9908	6.02073	6.0318	5.06029	5.08141	5.36203	5.21934	5.30756	5.42735	5.61004	5.96341	6.41719	7.14798	7.18543	6.95365	7.10471	6.95106	6.3745	6.31591	6.03017	5.75787	5.52938
2	euxassay_012426_14.jpg	NM_008689	18033	Nfkb1	NF-KB1|NF-kappaB|NF-kappaB1|p105|p50|p50/p105	7569		mouseTF		1	4.7654	4.70317	4.56101	4.65838	4.73863	4.85306	4.55193	4.98714	4.97019	5.2589	5.89377	5.27486	5.11522	5.587	5.1585	5.2491	4.88234	5.29132	5.053	4.63083	4.88415	4.62521	4.37138	4.41712	4.89586	4.90392	4.66577	4.88143	5.18371	5.92004	5.31903	6.01894	5.86334	5.96863	5.55497	5.2568	5.12597	4.96951	4.92165
2	euxassay_000151_11.jpg	NM_025811	66866	Nhlrc2	1200003G01Rik|AI835049|AV002846|AW496455	7569				1	5.68869	6.06075	6.1909	6.3867	6.15792	6.15149	5.85894	6.20649	6.07203	6.37626	6.66396	6.55347	6.55225	6.5702	6.51343	6.25587	6.21576	6.52516	6.69303	6.13242	5.42469	6.57813	6.62273	6.38094	6.26035	6.11562	6.09432	6.02779	6.36852	6.54074	6.58625	6.32434	6.48814	6.66329	6.40843	6.75137	6.59836	6.56368	6.22803
2	euxassay_012495_14.jpg	NM_153570	100608	Noc4l	AI326906|MGC28606	7569				1	5.05979	5.1203	5.05153	5.05636	5.1567	4.93958	5.26965	5.3903	5.10108	5.31474	5.45534	5.9435	5.46384	5.44495	5.23753	5.88503	5.25932	5.38099	5.06311	5.28969	4.345	4.65054	4.8825	5.05842	5.37493	5.19033	5.24932	5.11568	5.02435	5.24631	5.42483	5.68144	5.63058	5.84143	5.60336	5.18121	5.60226	5.4001	5.02996
2	euxassay_009618_11.jpg	NM_008711	18121	Nog	-		marker			1	4.76402	5.01197	5.1193	5.4009	5.40199	5.36468	4.95552	5.04841	5.14865	5.2357	5.59864	5.5939	5.48563	5.47948	5.84561	5.77543	5.42988	5.47073	5.31032	5.35278	4.17094	4.59523	4.95478	5.23388	5.5029	5.54716	5.26279	5.17424	5.19502	5.34791	5.43359	5.592	5.94002	5.82556	5.39656	5.43147	5.97902	5.36413	5.38291
2	euxassay_004863_14.jpg	NM_138747	110109	Nop2	120kDa|A530002O17|Nol1	7569				1	4.55939	4.81912	5.51479	5.22756	5.71553	5.62748	5.53617	5.91296	6.30974	6.07272	6.50564	6.42864	6.42118	6.33047	6.32548	6.24394	6.53964	6.65812	6.24499	5.53897	4.10279	4.62304	5.01243	5.72508	5.61538	5.91239	6.0271	6.20535	5.8734	6.22156	6.10374	6.41806	6.8314	6.51735	6.76417	6.4675	6.31579	5.90317	5.48451
2	euxassay_002983_11.jpg	NM_134122	106582	Nrm	2610307M02Rik|AI429796	7569				1	6.03298	6.21205	5.6562	5.62893	5.81649	6.13849	6.69122	7.04828	6.53029	6.50492	6.53605	6.9116	6.38729	6.58613	6.37736	6.1055	6.05013	5.88816	5.81174	5.76288	5.97591	5.78243	5.9238	6.04973	6.11479	6.44516	6.55635	6.59279	6.72393	7.04626	6.61231	6.74177	6.61204	6.25046	6.19501	6.29026	6.3079	6.3343	6.27551
2	euxassay_004886_11.jpg	NM_008740	18195	Nsf	AI316878|AU020090|AU067812|SKD2	7469				1	5.54489	6.07007	6.19931	5.78911	5.67974	5.54203	5.95463	5.906	5.94034	6.10426	6.58802	6.48829	6.7799	6.55339	6.52999	6.63695	6.02508	6.30601	5.88671	5.43555	5.76278	5.96322	6.34216	6.09178	5.65344	5.36859	5.56535	6.0379	5.98868	6.19494	6.4865	6.61634	6.09725	6.49878	6.23756	6.56698	6.20967	6.56969	6.2494
2	euxassay_007500_11.jpg	NM_028778	74137	Nuak2	1200013B22Rik|Omphk2|Snark|mKIAA0537	7569				1	4.59489	4.91484	4.98611	5.35703	5.23305	5.15871	6.18926	6.08213	5.55669	5.47164	6.06337	6.06007	5.54085	5.64022	5.70969	5.47911	5.24435	5.80164	5.9187	5.02277	5.4936	5.24797	5.27483	5.52608	5.03189	5.28661	5.82567	5.6965	5.96452	5.91529	5.68408	6.24885	6.24009	6.05513	5.96599	5.83251	5.30005	5.81024	5.41668
2	euxassay_006091_14.jpg	NM_027191	69736	Nup37	2410003L22Rik|2810039M17Rik	7569				1	4.36187	4.63455	4.47881	4.08561	4.15923	4.27242	4.34126	4.37834	4.78572	5.04074	5.22285	5.09736	5.03447	4.99839	4.74787	4.62054	4.95475	4.35223	4.40831	4.22208	4.48599	4.29097	4.21532	4.00053	3.96633	3.96376	3.97909	4.0666	4.68294	4.78313	4.71304	5.18511	5.27427	4.78904	4.77823	5.37131	4.54603	4.68872	4.43608
2	euxassay_001534_11.jpg	NM_019761	56488	Nxt1	1110001N02Rik	7569				1	5.59946	5.78958	5.93478	5.75734	5.48767	5.80154	5.51397	5.5029	5.51447	5.65517	6.61443	6.6081	6.93107	6.71703	6.57342	6.28681	6.14354	6.29033	6.04189	5.81461	4.98989	5.63053	5.70233	5.74667	5.22717	5.53239	5.40739	5.46296	5.62718	5.72394	6.45155	6.82802	6.71638	6.53862	5.88838	5.93291	6.25238	6.35498	5.87048
2	euxassay_007673_14.jpg	NM_019716	56452	Orc6	6720420I10Rik|MGC91038|Orc6l	7569				1	4.14871	4.8024	5.00817	4.5011	4.90761	5.00983	4.77923	5.18749	5.4598	5.64674	6.55851	6.3444	5.81564	5.87802	5.22968	5.21508	5.33907	5.41992	5.2932	5.08322	4.73276	4.49874	4.71761	4.3908	4.85523	4.56412	5.09734	5.45323	5.59793	5.97601	5.73125	6.23074	5.98262	5.90235	6.09616	5.58797	5.53917	5.01049	4.8182
2	euxassay_001203_14.jpg	NM_144841	18424	Otx2	E130306E05Rik	7569		mouseTF		1	4.75032	5.2328	5.85475	6.13849	5.8492	5.97073	5.93607	5.98801	6.10721	6.11601	6.08989	6.24842	6.42763	6.59035	6.40464	6.17267	6.22611	6.17433	5.98611	5.67237	4.90278	6.01007	5.99808	6.11555	6.00008	6.02195	6.06569	6.23017	6.5732	6.41265	5.96702	6.30324	6.29254	6.10091	6.28691	6.14065	6.19854	6.00183	6.00807
2	euxassay_011207_14.jpg	NM_026226	67543	Pabpc6	4932702K14Rik|AI428050|MGC132900|Pabpc3	7569				2	5.14423	4.44317	5.07696	5.3606	5.54185	5.52802	5.34162	5.7577	6.0337	6.21222	6.05957	6.30536	5.9856	5.72423	6.20464	6.40646	6.48849	6.22299	6.39635	6.23716	5.07696	5.31569	5.3593	5.46953	5.4242	5.1998	5.48512	5.92225	6.30029	6.33611	6.29008	6.14435	6.19737	5.99191	5.7846	5.78751	6.27705	6.23688	6.36654
2	euxassay_018936_14.jpg	NM_025939	67054	Paics	2610511I09Rik|ADE2H1|AIRC|PAIS	7569				1	6.53098	6.41335	6.20823	6.43636	5.89015	6.38486	5.79134	6.33609	6.63356	6.96211	6.76308	6.68982	6.75271	6.23082	6.50662	6.03888	6.10605	5.45042	5.81858	5.94156	5.79375	6.32414	6.51821	6.20715	5.93634	5.95971	5.91684	6.09952	6.23465	6.88635	7.01015	6.35037	6.4295	6.7722	6.29101	6.1586	6.49245	5.70332	5.87265
2	euxassay_001862_11.jpg	NM_198410	68957	Paqr6	1500001B10Rik	7569				1	3.54404	3.69489	3.7504	3.74869	3.84586	3.7281	3.745	4.05089	4.18325	4.65558	4.56255	4.56819	4.28953	4.03631	4.3458	4.38469	4.71782	4.89349	4.73598	4.73096	4.04904	3.64084	3.735	4.03654	3.75209	3.76899	3.8617	4.02392	4.72823	4.48303	4.38888	4.33544	4.36241	4.759	4.47378	4.41596	4.43866	4.5201	4.05732
2	euxassay_017942_14.jpg	X63963	18508	Pax6	1500038E17Rik|AEY11|Dey|Gsfaey11|Pax-6|Sey	7557|7569	marker	mouseTF		1	4.47619	4.46607	4.45588	4.76385	5.04786	5.58267	5.84859	6.61449	7.23746	7.172	6.99952	6.91968	7.36205	6.60051	7.09318	7.22707	7.01633	6.97647	6.50535	6.07887	4.64843	4.77443	4.74812	5.27245	5.04495	4.98926	5.62486	6.53979	6.86915	6.80823	6.49027	6.59679	7.0713	7.3601	7.04544	6.32115	7.00732	7.33749	6.81999
2	euxassay_006544_11.jpg	NM_023209	52033	Pbk	2810434B10Rik|AW538537|D14Ertd732e|TOPK	7569				1	5.347	5.12459	5.1307	5.16834	5.35289	6.2778	6.78908	7.26624	7.188	7.09984	7.13356	6.66414	6.67422	6.33895	6.43434	6.1195	6.36135	6.28364	5.66784	5.77301	5.4367	5.14285	5.54252	5.44224	5.28873	5.64965	6.36433	6.81825	7.28023	6.9206	7.32827	7.13516	6.97721	6.90119	6.36329	6.26917	5.86279	6.48354	6.31619
2	euxassay_014007_14.jpg	XM_987096	245578	Pcdh11x	A230092L07Rik|MGC141524|PCDHX|PCDHX11	7557				1	4.16863	4.1537	3.85083	4.2024	4.22257	4.12642	4.47649	4.25512	4.62138	4.45716	4.57505	4.63971	4.42518	4.25792	4.58288	4.30192	4.4535	4.38993	4.38687	4.2671	3.7605	4.31828	4.04205	4.38337	4.45924	4.61267	4.06709	4.36032	4.39502	4.54218	4.53988	4.46565	4.7873	4.62029	4.84142	4.45472	4.27871	4.45594	4.22257
2	euxassay_012073_11.jpg	NM_008800	18574	Pde1b	63kDa|Pde1b1	7569				2	5.35352	5.88567	5.57913	5.14153	5.46815	5.32238	5.42935	6.08975	6.167	6.66766	6.46267	6.18053	6.24852	6.28221	6.46992	6.12227	6.18494	6.29655	5.66859	5.25752	5.48512	4.69231	5.78336	5.16086	5.12587	5.27645	5.01055	5.57048	6.17621	5.32124	6.06568	6.10779	6.04432	6.42488	5.78958	6.021	5.99023	5.59588	5.94974
2	euxassay_012073_14.jpg	NM_008800	18574	Pde1b	63kDa|Pde1b1	7569				2	5.89868	5.66817	5.7432	5.71557	5.54851	5.67402	5.30033	5.45503	5.94067	6.63664	6.63525	6.30481	6.40792	6.29006	6.3486	6.03449	6.4843	6.06713	5.80287	6.04586	5.27748	5.60418	5.65278	5.53029	5.9905	5.29392	5.81979	5.74234	6.52693	6.81867	6.50739	6.259	6.01355	6.08652	6.34236	6.32113	6.38294	6.39949	6.03286
2	euxassay_014197_14.jpg	XM_992193	237823	Pfas	4432409B16Rik|FGAMS|FGARAT|Gm18|PURL	7569				1	4.93246	4.88442	4.86412	5.11292	4.81086	5.12675	5.06184	4.98125	5.31502	5.57865	5.54643	5.50819	5.80147	5.43474	5.24841	5.18886	5.42855	5.01881	5.2927	5.13666	4.86779	5.14196	5.02949	5.98223	5.05302	5.11215	4.98125	4.98968	5.13209	5.38957	5.36385	5.42855	5.41984	5.39656	5.27763	5.56855	5.67488	5.18299	5.65381
2	euxassay_011951_14.jpg	NM_021514	18642	Pfkm	AI131669|PFK-A|PFK-M|Pfk-4|Pfk4|Pfka|Pfkx	7569				1	5.7726	5.56141	5.86535	5.31189	5.43063	6.4658	6.22491	6.37859	6.47544	5.66803	6.59263	6.72702	6.77787	6.52392	6.37428	6.997	6.73607	7.07919	6.49008	6.29524	5.71528	5.30109	5.41129	5.3866	5.97168	5.75074	6.62872	7.11987	6.59495	6.40449	6.73667	6.90823	6.51097	6.6429	6.40751	6.6245	6.67306	6.74177	6.94902
2	euxassay_005053_11.jpg	NM_018870	56012	Pgam2	-	7569				1	4.11824	4.242	4.60777	4.26243	4.51467	5.13489	4.93368	5.11113	5.65788	5.31077	5.79025	5.76001	5.80371	5.3275	5.49681	5.38362	5.03086	4.94327	5.15153	4.61183	3.89938	4.38586	4.29662	4.42477	4.56584	4.49042	4.68992	4.81151	5.73055	5.81514	6.57229	5.49546	6.30149	5.86367	5.08303	5.55252	6.2403	5.06159	5.44991
2	euxassay_012530_11.jpg	NM_027629	70974	Pgm2l1	4931406N15Rik|AI553438|BM32A	7469				2	5.01799	5.05382	5.34858	4.98547	4.80112	5.07474	5.17221	4.83297	5.79041	5.35956	5.30789	5.29243	5.97043	5.67027	5.84887	5.21081	5.15161	5.07759	5.24418	5.07854	4.70729	4.76444	5.10207	4.93186	4.74245	4.81486	5.16419	5.38663	5.32798	5.68343	5.71916	5.74868	5.89162	5.65699	5.23485	5.07379	5.3407	4.89031	5.11693
2	euxassay_012530_14.jpg	NM_027629	70974	Pgm2l1	4931406N15Rik|AI553438|BM32A	7469				2	4.85769	4.6929	4.46147	4.81467	4.76542	5.11908	5.22717	5.38702	5.42109	5.47434	5.51464	5.48452	5.50054	5.582	5.61181	5.32172	5.26448	5.00357	5.00657	4.75675	4.2305	4.51153	4.66368	4.95651	4.85861	4.75358	4.92958	5.10129	5.35474	5.40163	5.54757	5.66543	5.30492	5.36903	5.26518	5.16672	5.20561	5.1734	4.88868
2	euxassay_000058_11.jpg	NM_172705	230936	Phf13	BC029632|Phf5	7540				2	5.15358	5.4058	5.5781	5.52617	5.52269	5.40126	5.41785	5.36904	5.47879	5.48166	5.85286	6.34961	6.20152	6.04524	5.97817	6.1383	5.40429	5.04512	5.51289	5.29176	4.96834	5.36671	5.35735	5.6014	5.3636	5.16256	5.0711	5.36204	5.40429	5.21356	5.71012	5.88142	6.02076	6.04961	5.79888	5.52808	5.53328	5.33111	4.82471
2	euxassay_012427_11.jpg	NM_146135	229615	Pias3	MGC27936|Pias3l	7569				1	4.44875	4.63983	4.72614	4.88014	4.78256	4.86188	5.04053	4.91066	4.91421	4.98002	5.04943	5.0002	4.99518	4.81272	4.6267	4.60182	4.70376	5.20832	4.78042	4.14059	4.48976	4.45729	4.5331	4.42656	4.65263	4.81044	4.76891	4.63446	4.94749	4.90443	4.80949	4.85636	4.7362	4.86921	5.04297	4.90621	4.85174	4.88828	4.95698
2	euxassay_007343_14.jpg	NM_172453	208084	Pif1	4631410M14|AI449441	7569				1	4.40278	4.24748	4.07342	4.25349	4.2879	4.16052	4.2305	4.53114	5.31368	5.61032	4.77563	5.27812	6.09473	5.43765	5.1568	5.12729	5.11578	4.7798	4.85096	5.40208	3.93055	4.41034	4.23294	4.27731	4.15667	4.23416	4.56539	4.78562	5.80802	4.95244	6.32497	5.43333	6.05142	5.52379	5.83682	6.11332	5.62416	6.04496	4.95884
2	euxassay_003253_11.jpg	NM_011085	18708	Pik3r1	AA414921|C530050K14|PI3K|p50alpha|p55alpha|p85alpha	7569				1	4.15688	3.97953	4.1362	4.28222	4.38682	4.35453	4.30808	4.25869	4.41464	5.01221	5.17043	5.21067	5.48869	5.50526	5.17562	5.26309	5.48213	4.88958	4.48791	4.47715	4.31346	4.11035	4.36624	4.30267	4.13489	4.17094	4.61	4.31347	4.57006	4.80896	5.44213	5.66333	5.39656	5.38126	5.45924	5.19179	4.88163	5.14891	4.78261
2	euxassay_006516_11.jpg	NM_145131	69617	Pitrm1	2310012C15Rik|AA410010|MP-1|MP1|Ntup1|PreP|mKIAA1104	7569				1	5.9334	5.69032	5.62686	5.42098	5.73658	5.80207	5.79631	5.95165	5.73958	6.42203	6.04616	5.95682	6.07056	6.08952	6.09064	6.01292	6.04564	6.38629	6.53083	6.44143	5.51513	5.65121	5.42259	5.58644	5.30471	5.47037	5.95276	6.1607	6.23403	6.23129	6.50581	6.28102	5.93901	6.01375	6.11782	6.14337	5.84181	6.30212	5.67613
2	euxassay_001641_11.jpg	NM_023058	268930	Pkmyt1	6230424P17|AW209059|Myt1	7569				1	5.8697	6.05228	6.05125	5.84839	5.582	5.76164	5.55895	5.33369	5.71154	6.80346	6.8769	7.3653	6.94158	6.9991	7.02354	6.48968	6.56639	6.25728	6.09635	6.0475	5.70563	5.72394	6.14483	5.848	5.80768	5.75523	5.52296	5.77752	6.10978	7.17845	7.1973	7.17703	7.37363	7.16543	7.15813	6.59126	6.70216	6.49946	6.16684
2	euxassay_013296_11.jpg	XM_893473	433022	Plcxd2	AW494639|EG433022	7538				1	4.95448	4.9839	4.6915	5.50358	5.9117	5.85537	5.85951	5.94396	6.72535	6.46271	6.70283	6.29575	5.45507	6.5158	6.47988	5.73512	5.44744	6.43751	6.13398	5.83772	4.71458	5.01274	5.46327	5.67495	5.32515	5.65759	5.92759	6.44994	6.74192	6.85633	6.83998	5.89092	6.09991	6.2554	5.35776	5.86731	5.95347	6.3227	5.78734
2	euxassay_001863_11.jpg	NM_016784	53317	Plrg1	AA958940|C80566	7469				1	5.32373	5.54815	5.23855	5.74929	6.05637	5.75226	5.42359	6.24148	6.33148	5.57137	6.24747	6.15076	5.05062	5.70951	5.29272	5.657	5.8807	4.80879	4.41542	4.65694	5.17002	5.50308	5.27961	5.44171	5.87843	6.13195	5.03824	6.10592	6.23161	6.73464	6.12152	6.16907	6.38904	5.89603	6.19884	6.06756	6.22229	5.98772	5.79186
2	euxassay_002573_14.jpg	NM_026162	67448	Plxdc2	1200007L24Rik|5430431D22Rik|AI646728|AU022916|AV231634|Tem7r	7557				1	5.92597	4.99676	4.65676	4.73609	4.95947	5.03312	4.57281	4.63757	4.76094	5.30454	4.90433	4.88367	4.89897	4.94999	4.99257	5.02083	4.75402	5.0076	5.18449	4.95465	4.92721	4.67001	4.79406	5.28069	6.06175	4.90611	4.84421	4.71387	4.77369	4.94393	5.1663	5.47701	5.65563	5.08835	5.47341	5.34257	5.26062	4.88095	4.89986
2	euxassay_014231_11.jpg	XM_902107	140570	Plxnb2	1110007H23Rik|Debt|mKIAA0315	7569				1	4.59807	5.0345	4.99052	5.2794	5.28176	5.66784	5.63688	5.79247	5.78002	5.78419	5.72047	5.45411	6.18882	6.16869	5.92401	6.44959	5.89782	6.11843	5.70028	5.35147	4.60373	5.09539	5.65198	4.98619	6.07624	5.99311	5.46659	5.3552	5.82435	5.90872	5.63365	5.90872	6.31441	5.61181	6.47799	6.11045	6.12687	6.09674	5.47013
2	euxassay_019551_11.jpg	NM_153798	231329	Polr2b	MGC47046|Pol2rb|Rpb140|Rpb2	7569				1	5.91093	6.14955	6.59878	6.38603	5.96941	6.11482	6.46328	6.59514	6.57552	6.73639	7.19952	6.76688	6.70562	6.78662	6.8446	6.83235	6.67614	6.95111	6.88416	6.70216	5.98366	5.83265	6.35699	6.38104	6.16348	6.24985	6.39177	6.64532	6.49027	6.57678	6.8501	6.87298	7.04726	6.91138	6.82211	6.84006	6.76061	6.56794	6.50403
2	euxassay_019559_11.jpg	NM_008900	18993	Pou3f3	Brn-1|Brn1|Otf8|Skin1	7557|7569	marker	mouseTF		1	6.29938	6.28917	5.94382	6.33952	6.99373	6.74147	6.92679	6.94599	7.10251	7.17122	7.23359	7.39028	6.97227	7.3244	7.39562	7.44319	7.14349	7.37104	7.51769	7.3246	5.56366	6.19713	6.01949	6.24793	6.7211	6.9031	6.86419	6.99791	7.29853	7.25955	7.32819	7.35801	7.41416	7.43209	7.34584	7.36522	7.3586	7.27682	7.40908
2	euxassay_012583_11.jpg	XM_001002886	231327	Ppat	5730454C12Rik|AA408689|AA675351|AI507113|C79945|MGC38417	7569				1	4.17443	3.94538	3.91078	4.11091	4.03611	5.09656	3.90467	4.45688	4.38088	4.30876	4.20951	4.82083	5.23636	4.48306	4.34658	4.15443	4.43816	4.25019	3.85911	3.64516	3.64394	3.80006	3.91837	4.01218	3.97626	3.91078	3.9893	4.04307	4.29482	4.92098	5.18231	4.69916	4.74087	5.00966	4.7545	4.64878	4.09938	4.23467	4.17528
2	euxassay_005130_14.jpg	NM_026845	68816	Ppil1	1110060O10Rik|AI327391|Cypl1	7469|7569				2	4.696	4.42835	4.59238	4.82696	4.74464	5.18152	5.23924	5.4881	5.81482	6.193	5.9143	6.05997	5.91607	6.01441	6.14132	5.99275	5.21571	5.37548	4.854	4.36104	4.16839	4.22704	4.94528	4.70627	4.79555	4.85215	4.89228	5.06663	5.70028	5.6335	5.76901	6.36038	6.0755	6.30604	6.33578	5.98265	5.99065	5.39275	5.30627
2	euxassay_012441_14.jpg	NM_173760	227399	Ppip5k2	AW555814|D330021B20|Hisppd1|Vip2|mKIAA0433	7557				1	4.87283	5.08368	4.93179	4.50626	5.10091	5.23252	5.09233	5.32473	5.30202	5.22525	5.17733	5.30283	5.39486	5.16755	5.1532	5.25578	5.10837	5.24483	5.34682	5.5224	4.47417	4.61383	4.6171	4.63119	4.79027	5.02663	5.14839	5.16039	5.66317	5.55754	5.27908	5.06975	5.29387	5.03888	5.04569	5.23294	5.07261	5.32939	5.49351
2	euxassay_009514_14.jpg	NM_025800	66849	Ppp1r2	0610025N14Rik|2310007G06Rik|4930440J04Rik|5430408E15Rik|D16Ertd248e|IPP-2	7469				1	4.02384	3.86475	3.85529	3.99109	4.24527	4.24768	3.91875	3.962	4.28692	4.07637	4.16201	4.32055	4.37343	4.31135	4.32627	4.17981	3.88478	4.06957	4.02759	3.52515	4.14399	3.74518	3.97225	3.74176	3.87571	3.93381	3.87259	4.33196	4.05724	4.39536	4.52435	4.58477	4.44877	4.32169	4.03086	4.52203	4.54967	4.5946	4.19009
2	euxassay_004804_14.jpg	NM_019674	56420	Ppp4c	1110002D08Rik|AU016079|Ppx	7569				1	4.64092	5.02703	5.70079	5.47974	5.38254	5.76803	5.7577	5.75077	5.11523	5.83368	6.06955	6.1018	6.58654	7.00722	6.20065	5.99107	5.76754	6.00612	6.15301	5.75868	5.26577	4.92795	5.38181	5.58056	5.68039	5.68841	5.78023	5.19179	5.38574	6.45873	6.2115	6.25937	6.6807	6.39253	5.60139	6.44346	6.27118	5.47494	6.12304
2	euxassay_013980_11.jpg	NM_008917	19063	Ppt1	9530043G02Rik|AA960502|C77813|CLN1|D4Ertd184e|INCL|MGC107420|PPT	7569				1	4.35453	4.41804	4.59996	4.53229	4.76822	4.74535	4.86805	4.99412	5.26696	5.47434	5.14994	5.42456	5.26934	5.2624	5.08721	5.04414	4.92343	4.86779	4.67419	4.34273	4.2537	4.48194	4.42764	4.29394	4.43613	4.51236	4.70641	4.82103	5.0352	5.30685	5.3552	5.49581	5.54528	5.36644	5.27625	5.17266	5.10518	5.2624	4.96594
2	euxassay_003376_11.jpg	NM_008922	19076	Prim2	AI323589	7569				1	5.66168	5.57489	5.6843	5.61076	5.6303	5.54017	5.34575	5.54223	5.70288	6.14158	6.36961	6.59161	6.38158	6.10944	6.07905	5.92136	5.76433	5.68086	5.60796	5.29337	5.37849	5.79468	5.7285	5.39686	5.47029	5.47535	5.42325	5.41651	5.4811	5.668	6.09731	6.54637	6.4993	6.37541	6.13942	5.84742	5.61534	5.36123	5.54412
2	euxassay_008428_11.jpg	NM_021381	58182	Prokr1	EG-VEGFR1|Gpr73|Pkr1	7569				1	5.40298	5.43149	5.54433	5.4761	5.23948	5.4609	5.85578	6.43556	6.08369	6.04925	5.99549	5.97525	6.26095	6.03221	6.35756	6.1592	5.81022	5.68324	5.93324	6.18477	5.27386	5.23863	5.5614	5.35129	5.11086	5.38544	5.70045	5.93704	6.26513	5.95213	6.15831	6.34893	5.73517	6.16904	6.03612	6.14115	6.35873	6.38169	6.07552
2	euxassay_001596_11.jpg	NM_177420	107272	Psat1	D8Ertd814e|EPIP|PSA|Psat	7569				1	5.65942	6.18925	5.44066	5.71279	6.14237	5.97407	6.22367	5.91153	6.29423	7.01534	7.26339	7.06919	7.10888	6.93975	6.80514	6.6612	6.36095	6.44851	6.35793	6.59968	6.15399	5.86632	5.54097	5.49702	6.11123	6.01359	5.85844	5.63059	5.82329	7.23767	6.23922	7.13144	6.91283	6.34976	6.56454	7.05008	6.84854	6.83316	7.031
2	euxassay_013664_11.jpg	NM_011965	26440	Psma1	C2|HC2|Pros-30|alpha-type	7569				1	5.92821	6.1622	6.59888	6.14871	5.89223	6.21098	6.20484	6.31195	6.60328	6.53087	7.08172	7.02574	7.1607	6.42503	6.59418	6.73808	6.33259	6.66981	6.05971	5.78118	5.85901	6.32368	6.32601	6.40474	6.16071	6.09656	5.95042	6.5008	6.16712	6.87957	6.15906	6.67044	6.95075	6.40171	6.91374	6.75509	6.59219	6.5497	6.53041
2	euxassay_003149_11.jpg	NM_008949	19183	Psmc3ip	C79099|GT198|HOP2|Tbpip	7569				1	5.61937	5.72417	5.8425	5.67167	5.66115	5.61284	5.65692	5.67586	5.73022	5.83081	6.38452	6.71159	6.59012	6.18827	6.14498	6.31085	6.3177	5.99522	5.88832	5.39801	5.0408	5.5875	5.86559	5.79901	5.94146	5.73374	5.64843	5.85824	5.69867	5.70637	6.40169	6.4756	6.40485	6.62139	6.71388	6.41208	6.06312	6.02957	5.54464
2	euxassay_007189_11.jpg	AJ238270	56088	Psmg1	AW552102|Dscr2	7569				2	5.6012	5.88189	6.22216	6.18739	5.78541	5.88822	6.25401	6.45559	6.68373	7.33578	7.24129	7.1698	7.20427	7.1908	7.17794	7.07276	6.662	6.39801	5.97063	5.90526	5.62143	5.93045	6.33302	5.98208	6.4242	5.76688	5.51386	6.19251	6.49374	7.03899	7.43329	7.5121	7.34106	7.50391	7.38139	6.59294	5.93805	5.85961	5.58226
2	euxassay_007189_14.jpg	AJ238270	56088	Psmg1	AW552102|Dscr2	7569				2	6.20183	5.76874	5.6933	5.95546	5.94821	6.11707	5.8139	5.91565	6.09238	7.07858	7.41981	7.39412	7.56113	7.47905	6.93898	7.14533	7.14555	6.71232	6.2143	6.35116	6.39896	6.79714	5.6045	6.05767	5.71726	5.44512	5.95288	5.44659	6.40805	7.15526	7.24443	7.38225	7.03427	7.31801	7.02125	7.25643	6.42643	6.52232	5.977
2	euxassay_014447_11.jpg	NM_153390	69307	Pxt1	1700001G18Rik|Stepp	7469				1	5.42514	5.85945	5.43753	5.71485	5.95557	5.96928	5.53467	5.54958	6.03758	6.24236	6.21169	5.93825	6.17888	6.23067	6.12707	6.1553	6.0605	6.03334	6.19392	5.98304	5.58452	5.57446	6.2606	5.69333	6.00175	6.06856	5.69385	6.10976	6.13393	5.95944	6.17259	5.99381	6.2906	6.00425	6.10589	5.98303	5.88987	6.01957	5.5998
2	euxassay_012259_11.jpg	NM_021881	19317	Qk	1110003F05Rik|1500005P18|QkI|l(17)-1Wis|l17Wis1	7557|7569				2	4.70202	4.72818	4.92268	5.44415	5.6588	5.07515	6.20008	6.5949	6.62305	7.4261	6.76814	6.63554	6.78395	6.57762	6.8952	7.0927	7.17985	6.67391	6.38552	6.41274	4.45818	4.51136	4.68788	4.84034	5.41439	5.35072	6.11111	6.11442	6.73477	6.33214	6.5364	6.55795	6.96703	7.39038	6.32502	6.80219	7.08406	7.08439	6.9192
2	euxassay_005572_14.jpg	NM_012025	26934	Racgap1	AI227039|AI327394|Band25|GTPase|MgcRacGAP|gtl11|mKIAA1478	7569				1	4.33197	5.57625	5.38016	4.9934	6.36395	5.99401	6.09126	6.46207	6.66288	5.86335	6.61762	6.48789	5.92928	6.60093	5.52744	6.87622	5.85044	6.0247	5.40919	6.06915	3.85212	4.25969	4.77326	4.56168	4.70466	5.58104	6.3483	6.26529	6.37944	5.7338	5.14347	5.06743	6.18824	5.78606	6.09361	5.73931	5.97715	6.08577	6.08969
2	euxassay_001498_11.jpg	NM_011234	19361	Rad51	AV304093|Rad51a|Reca	7569				2	5.93689	5.42681	5.34556	5.42532	4.95288	6.47744	6.81783	7.04821	6.97568	7.14833	6.88284	7.33464	6.63121	6.15728	6.66225	5.83723	6.54526	6.24612	6.03158	5.67618	5.50654	5.57943	4.72335	5.46868	5.65454	5.77887	6.50699	7.11125	6.87166	7.33405	7.37904	6.94946	7.31605	6.93591	6.74468	5.94107	6.32182	6.19934	6.11581
2	euxassay_001498_14.jpg	NM_011234	19361	Rad51	AV304093|Rad51a|Reca	7569				2	6.06369	6.30523	5.95087	6.34718	6.84827	6.74617	7.39	7.23385	7.15971	7.21002	7.10429	6.96923	6.92901	7.11145	6.83058	6.45887	6.47457	6.11746	6.17516	5.95512	5.01848	5.16928	5.46721	5.70878	6.31418	6.82321	7.28246	7.37089	7.05571	7.58275	6.88018	6.6855	6.80141	6.61311	6.84343	6.7889	6.91867	6.53229	6.57467
2	euxassay_001626_11.jpg	NM_009015	19366	Rad54l	RAD54	7569				2	5.7211	5.86785	5.4414	5.47363	6.0238	5.85082	6.74209	7.25293	7.10513	7.25695	7.12326	6.8823	6.46328	6.79285	6.59282	6.56735	5.67593	5.34308	6.18127	5.63393	4.91797	4.76622	5.58746	5.26157	6.50176	6.85464	7.38618	6.73383	7.41621	7.31498	7.19375	6.82313	6.76143	6.84212	6.14141	5.56585	6.37873	6.57712	6.3117
2	euxassay_001626_14.jpg	NM_009015	19366	Rad54l	RAD54	7569				2	5.48603	5.50309	5.40889	5.38607	5.41266	5.77015	6.38086	7.20649	6.85835	7.07446	7.1001	6.94351	6.9808	7.19833	7.02054	6.79805	6.54564	6.67363	6.09339	6.03896	5.39296	5.15726	4.90565	5.34486	5.20845	5.47813	6.20938	6.80588	7.31386	7.21763	7.20985	7.24979	6.85004	6.56651	6.34532	6.47441	6.19644	5.69431	5.6391
2	euxassay_015953_11.jpg	NM_030690	75646	Rai14	1700008J19Rik|1700020L11Rik|Ankycorbin|Norpeg|mKIAA1334	7569				2	3.8893	4.63009	4.62361	4.39509	4.17094	4.08854	4.68799	5.20017	5.30779	5.1412	5.04252	5.32288	5.20561	5.56475	5.5579	5.21304	5.82556	4.87587	4.96508	4.58763	4.86206	4.26773	4.47295	4.56471	4.86068	4.17981	4.32883	4.52957	5.31938	5.40935	5.13038	5.41547	5.3937	5.2277	5.37741	5.41063	4.90826	5.24358	4.9362
2	euxassay_015953_14.jpg	NM_030690	75646	Rai14	1700008J19Rik|1700020L11Rik|Ankycorbin|Norpeg|mKIAA1334	7569				2	5.21134	4.94817	4.77865	4.88447	4.91985	5.15667	5.42042	5.19918	5.34434	5.04845	5.31726	5.65801	5.68443	5.62721	5.52229	5.35143	5.16116	5.28226	5.0961	4.76428	4.22099	5.16384	5.49625	5.59838	4.71294	4.89313	4.87685	4.71538	5.32448	5.95429	5.57638	5.85919	5.62396	5.44713	5.40007	5.76564	5.17453	5.55471	5.29211
2	euxassay_012458_11.jpg	NM_181406	109093	Rars2	1500002I10Rik|PRO1992|Rarsl	7569				1	4.32166	4.45502	4.82262	5.61647	4.83069	4.67536	4.77407	4.5631	4.79057	5.38755	5.90043	5.59468	5.86648	5.59909	4.83992	5.17992	5.57856	5.22419	4.50781	4.73347	4.01674	4.54605	4.81641	4.97262	5.1902	4.75143	4.67923	4.69994	5.05369	5.57183	5.70173	5.61226	5.49867	5.8919	5.49572	5.27958	4.93556	5.34808	4.60323
2	euxassay_014140_11.jpg	AK032643	226525	Rasal2	6530401P13|A330066M24Rik	7557|7569				1	3.85592	3.82232	3.84257	3.8381	4.05999	3.99512	4.20784	4.21476	4.39166	4.46753	4.84863	4.93081	4.78144	4.73524	4.91496	4.68004	4.50895	4.35296	3.86034	3.50057	3.93351	3.84704	4.26398	4.18158	4.05034	4.31158	4.47186	4.41439	4.52853	4.95375	4.98648	4.84529	5.02834	4.90963	4.75912	4.56149	4.31883	4.04307	3.79717
2	euxassay_012215_11.jpg	NM_011992	26611	Rcn2	AA408742|Tcbp49	7569				1	4.44036	5.04356	5.50341	5.27072	5.28792	5.49345	5.81766	5.9005	5.691	6.13145	6.01275	6.12954	5.86885	5.85507	5.75572	5.76115	5.83555	5.87022	5.54757	5.27763	5.05669	4.63263	5.09806	5.20747	4.99699	5.78875	6.0405	5.85632	5.71561	6.34073	5.87978	6.19701	6.04669	5.77975	5.60688	5.88837	5.57529	5.60414	5.42171
2	euxassay_006227_11.jpg	NM_058214	79456	Recql4	RecQ4	7569				1	3.73662	3.84576	3.95463	3.96053	3.91874	3.99828	4.03086	4.03506	4.52734	5.19314	5.19814	4.77744	5.34397	4.86648	4.59238	4.46649	4.49114	4.59807	5.01764	4.22337	3.98098	3.76068	3.91077	4.1963	3.76553	3.962	4.01112	3.95463	4.07773	4.87587	4.80555	4.74193	4.48706	5.0289	4.79898	4.52336	4.3679	4.60561	4.35565
2	euxassay_010694_11.jpg	XM_977036	69263	Rfc3	2810416I22Rik|38kDa|AU022547|Recc3	7569				1	3.99827	4.4952	4.08314	4.11035	3.94327	3.4489	3.6749	3.5367	4.13032	4.54739	4.38426	4.71748	4.48075	4.41339	4.19301	4.57903	4.00946	3.539	4.01938	3.72223	4.05517	4.0325	4.43825	4.09167	4.27947	4.29861	3.76215	4.1119	4.46752	4.10726	4.80132	4.60451	4.40079	4.27672	4.85307	4.49622	4.04064	4.01773	3.88875
2	euxassay_000326_14.jpg	NM_053075	19744	Rheb	-	7569				1	5.78492	6.03937	6.16336	6.35929	6.25646	5.85306	6.46257	6.57892	6.46014	6.76089	6.57668	6.28243	6.20016	6.38381	6.31769	5.99972	6.34884	6.46952	6.0068	5.63277	5.63062	6.19506	6.07576	6.31803	5.93482	6.11561	6.15888	6.44826	6.53234	6.56205	6.51638	6.55155	6.3937	6.24417	6.57051	6.62891	6.76925	6.11645	6.1275
2	euxassay_001776_14.jpg	NM_020599	19771	Rlbp1	3110056M11Rik|CRALBP	7557|7569				1	3.43882	3.87187	3.73611	4.49016	4.50435	4.36609	3.90113	4.73252	4.87917	4.30144	5.03397	3.78964	4.8965	5.17731	4.72769	4.50999	4.97912	5.18438	5.21059	4.89757	3.39123	3.59952	3.85904	4.66778	4.62727	4.31868	4.4657	4.56521	4.35569	4.95555	4.57061	4.50577	5.11113	4.98521	4.60132	4.91681	4.95348	4.87372	4.7753
2	euxassay_002062_11.jpg	NM_025607	66510	Rnf181	1700047F16Rik|2500002L14Rik|6230415N01Rik|C77350|MGC103058	7469				1	5.59356	4.36598	4.8948	5.55543	5.22703	4.91973	5.50396	5.52558	5.57069	6.10755	5.81377	5.71042	5.8223	5.46518	5.7447	5.60732	5.59466	4.55059	4.6358	4.33719	4.10784	4.41636	5.07884	5.23779	5.32625	4.82771	5.36307	5.7462	5.67006	5.98636	6.16155	6.12832	6.20999	5.90622	5.41283	5.59521	5.57181	4.45272	4.15873
2	euxassay_006550_11.jpg	NM_019428	54364	Rpp30	Rnasep2|TSG15	7569				1	5.3018	5.82729	5.94189	5.88675	5.67246	5.54694	5.79084	6.79516	7.06281	6.33591	6.75342	6.41834	6.53227	6.36002	6.43187	6.11782	5.88697	6.14355	5.51749	5.40093	5.30078	5.54264	5.70202	5.95681	5.41508	5.6842	6.24479	6.43419	6.59497	6.38085	6.39425	6.41459	6.26629	6.27356	6.02957	6.14733	6.22581	6.16456	5.9288
2	euxassay_012310_14.jpg	NM_025949	67071	Rps6ka6	2610524K04Rik|RSK4	7469				1	3.54137	3.59983	3.53907	3.7019	3.75035	4.17246	5.05626	4.69603	4.78011	4.84476	5.65647	4.84103	4.98634	4.98499	4.48699	5.12294	4.73708	4.77621	4.07057	3.56368	3.50418	3.19264	3.46116	4.11658	4.09797	4.07913	4.28501	4.70936	5.20563	5.22433	5.18375	5.45195	4.81943	4.73668	5.12601	5.5437	4.91658	4.73226	4.79481
2	euxassay_012459_14.jpg	NM_009103	20133	Rrm1	RnrM1	7569				1	5.12952	5.01521	5.65308	5.57385	5.1168	5.88125	6.45448	6.65708	7.08213	7.43859	7.28672	7.03548	6.51111	6.57741	6.30152	6.67004	5.96267	5.80014	5.52734	5.26756	5.37331	4.98263	4.74726	5.19298	5.26353	4.87476	5.47832	6.78022	7.35711	7.45896	7.15929	7.5701	7.21474	7.00934	7.17646	6.91473	7.03841	6.47481	5.98156
2	euxassay_004733_11.jpg	NM_009104	20135	Rrm2	AA407299|MGC113712|R2	7569				1	5.00488	5.39095	5.09831	4.95637	4.93032	5.30751	5.42493	5.65902	5.94462	6.32854	6.98894	6.86163	7.19016	6.88472	6.39288	6.69104	6.47986	5.66627	6.4428	5.99101	5.26692	4.74482	5.16088	4.88523	5.10919	5.38073	5.30391	6.26674	6.19075	7.14721	6.95028	6.98205	6.5786	6.63524	6.75161	6.46406	5.93316	6.17724	5.2789
2	euxassay_019658_11.jpg	NM_0197433	56353	Rybp	2410018J24Rik|DEDAF|MGC62213|YEAF1	7538				1	4.89138	5.21081	5.33634	4.95349	5.11831	5.57108	6.21726	6.1261	6.55478	6.63882	6.23652	6.21887	6.35288	6.303	6.50049	6.35043	6.51283	6.59721	6.02388	5.66648	4.88054	5.71123	5.66143	5.40567	5.73671	6.682	6.70339	6.29383	6.55376	6.07352	6.48849	6.33859	6.5255	6.31664	6.40394	6.10705	6.30046	5.98581	5.45802
2	euxassay_010911_11.jpg	NM_178280	20689	Sall3	B130022O04Rik|Msal|Msal-1|Sal|Salt|Spalt	7557|7569				1	3.8537	3.81192	3.68947	3.69979	3.72223	4.06638	3.98604	4.10415	4.17242	4.22623	4.52319	4.38426	4.41839	3.8351	4.2032	4.16797	4.43825	4.0078	4.12574	4.26287	3.74347	3.75029	4.11256	3.74859	3.71061	3.91874	4.01608	3.90988	4.41339	4.49029	4.0901	4.17538	4.57343	4.2836	4.03086	4.41589	4.62306	4.33083	4.5451
2	euxassay_004943_14.jpg	NM_028349	72776	Sass6	2810453L12Rik	7569				1	3.99356	4.91337	4.76377	4.56237	4.92473	5.21039	5.55484	5.62519	5.85858	6.28555	6.12683	6.24184	6.00862	5.91962	5.76903	5.72828	5.6319	5.27628	5.29273	4.9762	4.3006	4.42094	4.81836	4.89116	4.86547	4.69383	5.47196	5.52862	5.80961	6.05638	6.11113	6.19447	6.17501	5.99151	5.945	5.88161	5.72677	5.54759	5.50469
2	euxassay_003227_11.jpg	NM_172769	235293	Sc5d	A830037K02|A830073K23Rik|Sc5dl	7469				1	4.18863	4.34667	4.05228	4.30997	4.45588	4.66242	4.84863	4.62133	4.62783	4.71464	4.51877	4.64842	4.89678	4.96406	5.08706	4.74005	4.75912	4.76503	4.65226	4.20957	4.07908	4.28907	4.11468	4.48624	4.4588	4.48481	4.63945	4.65862	4.47763	4.2113	4.66999	4.88054	4.64842	4.67878	4.8397	4.72921	4.92026	4.80112	4.78493
2	euxassay_014100_14.jpg	BC023842	72193	Scaf11	1110061H03Rik|2610510E10Rik|AI462454|CASP11|SIP1|SRRP129|Sfrs2ip|Srsf2ip|mKIAA3013	7569				1	3.46731	3.67341	3.69479	3.69479	3.6626	3.66229	3.72627	4.03413	4.34404	4.36882	4.2376	4.33613	4.63063	4.3215	4.69806	4.1455	4.14701	4.2836	4.48314	4.31481	3.83617	3.58266	3.65171	3.65171	3.67699	3.9502	3.66079	3.86946	4.13228	4.53031	4.11653	4.54706	4.88365	4.63171	4.78493	4.55537	4.15153	4.4554	4.15603
2	euxassay_012592_11.jpg	NM_027268	69938	Scrn1	2810019K23Rik|6330535A03Rik|AI852905|KIAA0193|SES1|mKIAA0193	7557|7569				2	4.31749	4.81724	4.35714	4.49453	4.09704	4.5127	4.77102	5.17762	5.81746	6.04935	5.72199	5.83676	5.96076	5.32544	5.62517	5.82313	5.73759	4.98764	4.83032	5.46444	4.47818	4.30596	4.26128	4.5127	4.39137	4.74649	4.82938	5.20085	5.31272	5.98963	5.92602	5.60061	5.81935	5.95042	5.43324	5.77027	5.75798	5.18488	5.14466
2	euxassay_012592_14.jpg	NM_027268	69938	Scrn1	2810019K23Rik|6330535A03Rik|AI852905|KIAA0193|SES1|mKIAA0193	7557|7569				2	4.07592	4.29044	4.49266	4.35453	4.64565	4.53822	4.67837	5.83695	5.90005	6.06437	5.84255	5.78121	5.76852	6.346	5.27349	5.02244	4.7036	4.71951	4.87509	4.57096	4.76148	4.38682	4.33877	4.26426	4.43578	4.82507	4.83634	4.94441	5.21067	5.57193	5.5338	5.56291	5.71052	5.67331	5.80625	5.84609	5.05944	4.87509	4.92238
2	euxassay_004189_11.jpg	NM_022324	64136	Sdf2l1	-	7569				1	4.51176	4.48194	4.90429	5.55293	5.21686	4.98547	5.75374	5.78169	5.49048	5.94151	5.73128	5.77292	6.41337	6.55308	6.50093	6.33661	6.21834	5.91053	5.90853	5.88905	4.27727	4.62653	5.09458	5.36112	5.1002	5.43115	5.594	5.58868	5.89916	6.54589	6.16393	5.94671	5.99715	6.90537	6.4505	6.20482	6.39872	6.94169	5.77658
2	euxassay_005026_11.jpg	NM_175102	66125	Sf3b5	10kDa|1110005L13Rik|AU043053|Sf3b10	7569				1	4.51737	4.61611	4.61742	4.50047	4.32444	4.46897	4.23703	4.66999	4.78027	4.76267	5.08044	5.18461	5.17132	5.10487	5.47794	5.20039	5.13984	4.88462	4.57735	4.56893	4.44562	4.36234	4.36234	4.50472	4.76385	4.70606	4.50895	4.54647	4.55468	4.75912	4.88489	5.29243	5.47073	5.19164	5.13802	5.00457	4.82281	4.65989	4.59238
2	euxassay_009464_11.jpg	NM_199007	68549	Sgol2	1110007N04Rik|4932411A20Rik|5730576N04Rik|AU018846|AV008062|D1Ertd8e|Tripin	7569				1	3.64053	3.71566	3.63317	3.57479	3.73299	3.77039	4.06258	5.21215	5.41675	4.75858	4.63929	4.37662	4.94098	4.99308	4.34411	4.07123	3.83145	4.30815	4.23767	3.96746	4.02931	3.58054	3.5299	3.54959	3.32121	3.97209	4.11374	4.7407	4.78498	5.02461	5.555	5.13973	5.25405	5.03768	5.07858	4.29187	3.76422	3.98781	4.37534
2	euxassay_011301_14.jpg	NM_134091	105835	Sgsm3	1810012I01Rik|AI428557|BB175482|Cip85|R75178|RUSC3|Rutbc3	7469				1	5.76292	5.40642	5.83209	5.99124	5.85608	5.94931	6.04418	5.95397	5.92472	5.93209	6.18832	6.1192	5.98391	5.97884	6.07114	6.23918	6.07827	5.82828	6.08242	5.56855	5.68467	5.52883	6.03541	6.1892	5.57193	5.58534	5.86271	5.94723	6.21186	6.22649	6.21359	5.98619	6.36285	6.05375	5.97566	6.07114	5.99652	5.64662	5.91916
2	euxassay_006012_11.jpg	NM_011369	20419	Shcbp1	mPAL	7569				1	5.16486	5.19471	5.33208	5.2357	5.14994	5.13503	5.36079	5.15958	5.31262	5.32296	5.748	6.34205	6.43391	6.50017	6.69444	6.11111	5.91443	5.67771	5.8316	5.74202	5.41264	5.50158	5.23144	5.04703	5.09806	5.04356	4.85624	5.60665	5.61975	6.10513	6.38104	6.41122	6.24907	6.51402	5.86813	5.79247	5.90834	5.582	5.76789
2	euxassay_002665_14.jpg	NM_009169	20422	Shfm1	DSS1|Shfdg1|Shfg	7569				1	4.80225	4.96946	5.29987	5.10737	5.44045	5.97974	6.06976	5.92877	5.92877	6.23327	6.77345	6.61866	5.941	6.74085	6.2621	6.21	6.31339	6.0611	6.17752	5.765	5.43992	5.34846	5.363	5.7317	5.47003	6.30395	6.51643	6.11568	6.59343	6.37359	6.87686	5.99729	6.68871	6.70596	6.2154	6.34529	5.99854	5.96172	5.65531
2	euxassay_010621_14.jpg	NM_009171	20425	Shmt1	AI324848|AI385541|C81125|Shmt|mshmt|mshmt1|mshmt2	7569				1	3.66097	3.58018	3.73507	3.50875	3.41266	3.79866	3.94322	4.04772	4.24152	5.00321	5.28475	4.53496	4.47568	4.49713	4.6645	4.03945	4.04432	4.09445	4.00243	3.5882	3.8283	3.68859	3.38224	3.65079	3.89015	3.93695	3.90307	4.36023	4.29965	4.57587	4.50844	4.39417	4.50598	4.86758	4.48823	3.81583	3.54765	3.76368	3.92011
2	euxassay_012345_14.jpg	NM_181590	72171	Shq1	2810403P18Rik|Grim-1	7569				1	3.48173	4.06684	4.359	3.89739	4.02759	4.00447	4.05034	4.27396	4.17242	4.51035	4.81182	4.6584	5.04252	5.06823	5.08643	4.38681	4.71647	4.64458	4.09948	4.1196	3.53209	3.71933	4.11785	4.27633	4.50734	4.29744	4.22091	4.46234	4.56265	4.21969	4.56556	4.72818	5.116	4.62523	4.57327	4.51637	4.52899	4.35714	4.0078
2	euxassay_012757_14.jpg	NM_025679	66641	Sike1	2810005O12Rik|5730470L24Rik|AI450236|AI839862|Sike|Sikeb	7469				1	4.24406	4.32855	4.56845	4.61124	4.71603	4.74763	4.90036	4.49148	4.85584	5.1734	5.28656	5.46227	4.99973	5.21715	5.76115	4.80227	4.68461	5.4659	4.53707	4.72457	3.91268	4.13228	4.49012	5.1359	4.94874	4.79266	4.74464	4.78687	5.09739	4.86962	5.18152	5.35995	5.2995	4.83727	4.99136	5.06344	4.65735	4.88507	4.55423
2	euxassay_009988_11.jpg	NM_009193	20492	Slbp	-	7569				1	3.70398	3.98274	4.40211	4.11417	3.96819	4.14298	4.4129	5.43265	5.34014	6.32079	6.03988	6.66206	5.73654	5.20822	5.17375	5.60487	4.99296	4.3994	4.27796	3.64296	3.96379	4.02274	3.8477	3.68452	3.6648	4.02274	4.12077	4.60957	5.54187	6.32107	5.65254	6.20636	5.502	5.92924	5.82234	5.21348	5.1711	4.70514	4.80886
2	euxassay_013787_11.jpg	NM_145947	208890	Slc26a7	MGC30955	7569				1	5.35785	5.48439	5.08389	5.27678	4.98528	5.27402	5.37919	5.55029	6.1563	5.88556	5.65358	5.74668	5.51882	5.57303	5.5083	5.4054	5.31083	5.28229	4.99218	4.53635	5.222	5.24543	5.61822	5.28982	5.04719	5.27057	5.17722	5.48701	5.82002	5.83076	5.82002	6.02149	5.88004	5.79367	5.4625	5.4625	5.58176	5.22	5.29867
2	euxassay_019705_11.jpg	NM_178675	215085	Slc35f1	Duf6|E130016L02	7569				1	5.358	5.32078	5.06807	5.21168	5.1615	5.04786	5.30221	5.60392	6.12588	6.46	6.2716	6.4549	6.77686	6.4302	6.50235	6.40356	6.29465	6.06636	6.14955	5.76999	5.50502	5.06424	5.35721	5.27432	5.13163	5.31193	5.11877	5.26684	5.84831	6.07161	6.14276	6.8551	6.86255	6.30806	6.33015	6.46219	6.54108	6.11574	6.04661
2	euxassay_004867_14.jpg	NM_013901	30791	Slc39a1	Zip1|Zirtl	7569				1	4.67012	4.79663	5.43473	5.08405	5.20445	5.23396	5.19573	5.85321	6.31445	6.14741	6.20396	6.43734	6.2629	5.95109	5.92846	6.03089	6.00907	5.91922	6.30304	6.00492	5.2515	4.80074	5.11411	5.27239	5.4241	5.45679	5.51103	5.68803	5.63556	6.0705	6.44923	6.25752	6.33132	6.28509	5.91258	6.20214	6.09678	6.19705	5.83045
2	euxassay_012144_11.jpg	NM_173865	98396	Slc41a1	AI573938|B230315F01Rik	7540				1	4.01938	3.98503	3.86475	3.82458	3.82232	4.23874	4.59504	4.2113	4.68253	4.28387	4.25226	4.48767	4.43972	4.38707	4.48051	4.38246	4.13489	4.18334	4.03869	3.83136	3.7303	3.68947	4.19448	3.89523	3.97079	4.58572	4.58706	4.47763	4.66368	4.9371	4.2061	4.5313	4.22851	4.34982	4.34036	4.728	3.81322	4.44268	4.47475
2	euxassay_012159_11.jpg	NM_198863	245450	Slitrk2	A930040J07	7558|7569				1	4.11097	4.30997	4.25226	3.6466	3.40166	3.47557	3.82458	4.13672	4.52296	4.41889	4.26565	4.12022	4.11653	3.96053	3.88007	4.01509	3.84481	3.69195	3.63567	3.46472	4.12757	3.95847	3.74073	3.50693	3.41073	3.48419	3.55136	4.07718	4.2723	4.11837	4.15122	4.30835	3.94396	3.76216	3.76216	3.80178	3.91024	3.99713	3.76923
2	euxassay_010980_11.jpg	NM_198864	386750	Slitrk3	-	7469				1	5.70202	5.6294	5.98163	6.3795	6.29873	6.02216	6.04661	6.09478	6.36479	6.51186	6.76659	6.64756	6.50235	6.53071	6.3373	6.32496	6.22221	6.20623	6.37478	6.08655	6.28564	6.70861	6.23886	6.49952	6.07969	6.24648	6.02954	6.26494	6.00079	5.95862	5.79907	6.55887	7.01806	7.0916	6.44463	6.15361	5.91253	5.91386	6.3376
2	euxassay_011062_11.jpg	NM_008017	14211	Smc2	5730502P04Rik|AI255214|AW545314|CAP-E|CAPE|Fin16|SMC-2|Smc2l1	7569				1	5.58934	5.69276	5.47794	5.71001	6.12082	6.83024	7.39109	7.42749	7.40969	6.99412	7.2669	6.75022	6.81359	7.07725	7.23321	7.00046	6.53634	7.00046	7.36546	6.93154	6.4698	6.26993	5.94151	6.12863	6.40015	7.04666	7.23799	7.22787	7.26508	6.7532	7.11763	7.09846	7.07873	7.12712	6.61203	6.40677	6.71861	6.81216	7.20334
2	euxassay_015934_11.jpg	NM_133786	70099	Smc4	2500002A22Rik|C79747|SMC-4|Smc4l1	7569				1	5.38291	4.67449	4.58858	4.56071	4.54902	4.97677	4.93471	5.0615	5.56081	6.2066	6.55697	6.57077	6.489	6.56788	6.58085	6.44315	6.24666	5.54373	5.22073	4.97786	4.05861	4.5392	4.44352	4.50532	4.79569	5.04147	4.94069	5.39819	5.27763	6.29179	6.49206	6.46872	6.47182	6.47311	5.88101	6.01877	5.90414	6.10779	5.81149
2	euxassay_012315_14.jpg	NM_172429	76479	Smndc1	2410004J23Rik|4933440I19Rik|MGC106917	7569				1	4.53665	4.36057	4.45495	4.64793	4.76309	4.81242	4.96904	4.91295	5.25271	5.57537	5.73512	5.17608	4.90628	5.08102	5.06315	4.71355	4.63347	4.29879	4.0911	4.03353	4.28364	3.94783	4.03842	4.17425	4.4021	4.74945	4.98128	4.96186	5.49997	5.7587	5.29416	5.11842	5.32747	5.6127	4.74826	4.86011	4.61887	4.68423	4.38379
2	euxassay_001471_14.jpg	NM_026506	68011	Snrpg	2810024K17Rik|AL022803|SMG	7569				1	6.5545	6.41463	7.02128	7.30593	7.15063	6.83235	7.12732	6.90682	7.13817	7.32937	7.03642	7.31954	7.17443	5.92929	6.9702	7.03275	7.10881	6.57936	6.7942	7.1016	6.34765	6.3506	6.56131	6.80394	6.87121	7.28381	6.86067	7.28535	6.82082	7.25908	7.30339	7.18114	7.16262	6.88529	6.94549	6.79044	7.13254	6.96764	6.75199
2	euxassay_012190_14.jpg	NM_080843	67296	Socs4	3110032M18Rik|A730004F22Rik|AI427843|AU015727|AU015859|MGC143730|MGC143731|Socs7	7569				1	3.89542	3.73412	3.78927	4.25156	4.50672	4.78387	4.85483	4.879	5.04065	5.9799	5.23109	5.6135	5.29617	5.4798	4.95642	5.22596	5.39091	5.2748	4.91345	5.02104	3.9825	4.51726	4.08995	4.23746	4.15288	4.36091	4.35961	4.27106	5.119	5.55196	5.95841	5.35062	5.24806	5.21045	5.75735	5.76031	5.4941	5.29045	5.02203
2	euxassay_019565_14.jpg	NM_009233	20664	Sox1	BB176347|Sox-1	7569		mouseTF		1	6.4604	6.36152	6.52013	6.56611	6.80848	6.6519	6.68305	7.14328	7.3192	7.52228	7.58666	7.52903	7.37048	7.32896	7.19479	7.27952	7.22707	7.34153	7.27616	7.13997	5.48698	6.00907	6.15208	6.64351	6.6523	6.69431	6.64551	7.1007	7.21274	7.08573	7.28775	7.35661	7.53119	7.49921	6.91426	7.11118	7.32696	7.3028	7.29415
2	euxassay_019525_11.jpg	NM_011443	20674	Sox2	Sox-2|lcc|ysb	7557|7569	marker	mouseTF		1	5.99117	6.05495	5.73955	5.90585	5.90938	5.43345	5.62891	6.00198	7.17445	7.21139	7.43695	7.24876	7.19742	6.92067	6.95927	6.96661	7.02686	6.64031	6.98535	6.4208	6.02387	5.67631	5.88668	5.53133	5.70425	5.80445	6.66591	7.36035	7.28636	7.19929	7.11044	7.29309	7.02791	7.26939	6.74308	6.73493	6.66579	6.56225	7.02703
2	euxassay_006353_11.jpg	NM_026282	67629	Spc24	2410030K01Rik|AV109292|Spbc24	7569				1	4.30325	4.55098	4.51337	4.69142	4.39536	4.58095	4.5033	4.5633	5.31703	5.58367	6.30029	6.25832	6.78371	6.19956	5.73229	5.54586	5.25262	4.77911	4.85122	5.00557	4.7581	4.31711	4.37675	4.2834	4.5819	4.58763	4.67089	4.86648	5.00129	5.81989	6.7861	6.99117	6.18384	6.08969	6.58125	5.76312	5.05462	5.32305	5.09349
2	euxassay_000451_14.jpg	NM_025565	66442	Spc25	2600017H08Rik|2610205L13Rik|Spbc25	7569				1	5.11042	4.68955	4.53795	4.72837	4.88214	5.61985	5.49508	6.18228	7.26287	7.13603	6.88659	6.31438	6.68381	6.60795	6.80345	5.88773	5.71417	5.39869	5.71172	5.958	4.83892	5.46576	4.96146	4.93025	5.12427	5.3375	6.25824	6.22362	6.89828	6.80651	6.66371	6.98777	6.51074	6.71771	6.56964	6.14901	5.77339	6.03336	5.78216
2	euxassay_012639_14.jpg	NM_026499	67996	Srsf6	1210001E11Rik|AI314910|AW146126|Sfrs6	7569				1	6.38543	5.97211	6.09344	6.46328	6.12649	6.07788	6.45416	6.25098	6.49827	6.06277	7.00971	7.05301	6.62846	7.13399	7.03682	6.66473	6.70036	6.64644	6.85722	6.71772	5.4117	5.65016	6.30749	6.00404	5.86427	5.78654	6.27429	6.35124	7.07814	7.00452	6.74114	6.69959	6.50182	6.88822	6.69804	6.42274	6.96999	6.34172	6.32682
2	euxassay_001696_14.jpg	NM_212468	381760	Ssbp1	2810480P10Rik|G630031O20Rik|MtSSB|mtDBP	7569				1	4.60903	5.08304	4.73304	4.83445	5.51179	6.23353	6.50916	6.05314	5.74778	5.63832	5.2027	5.87932	5.8834	6.13373	6.99909	6.27842	6.29791	6.21618	5.78459	6.28151	4.58252	4.69907	4.74163	5.30142	5.29502	5.28742	5.24216	5.7116	5.96099	5.66903	5.61024	6.01864	5.65091	6.03095	6.36074	6.33403	6.17609	5.75522	5.56798
2	euxassay_007241_14.jpg	NM_021465	20843	Stag2	9230105L23Rik|B230112I07Rik|SA-2|SAP2	7569				1	5.93584	6.12572	5.94455	5.74828	5.81006	5.82663	5.57697	5.77439	6.46055	6.62662	6.52376	6.03541	6.30847	6.48813	6.64372	6.16304	6.48025	6.60998	6.34205	6.53141	5.58979	5.6335	5.84906	5.96351	5.80673	5.59256	5.44704	6.2716	5.74091	6.13685	6.13867	6.35699	5.92788	6.58715	6.3741	6.50129	6.11111	6.09713	5.96633
2	euxassay_004868_11.jpg	NM_213659	20848	Stat3	1110034C02Rik|AW109958|Aprf	7540		mouseTF		1	5.03849	5.02214	5.03605	5.54015	5.76117	6.01731	6.16611	6.01814	5.76461	6.16722	6.54166	6.21368	6.23476	6.21512	6.73137	5.90186	6.34535	5.75178	6.03461	5.58091	5.16823	5.57195	5.29953	5.19983	5.00394	5.53497	5.88387	5.88297	5.87389	6.3285	6.17575	6.36364	6.90415	6.31279	6.2205	5.92798	5.82005	5.94673	5.79986
2	euxassay_019576_11.jpg	NM_011489	20851	Stat5b	-	7557		mouseTF		1	5.78372	6.02387	6.03418	6.17661	5.96709	5.51731	5.76616	5.61671	6.38584	6.1039	6.21812	6.12679	6.43261	5.92655	6.01721	6.30055	6.23875	6.18247	5.97068	5.32657	5.39693	5.51801	5.56618	5.50041	5.36539	5.65475	5.56888	5.94437	5.93024	6.34224	6.31994	6.23715	6.33372	6.18798	5.89188	5.71855	5.58216	5.83755	5.866
2	euxassay_019556_14.jpg	NM_033618	114741	Supt16h	Cdc68|Fact140|Spt16	7569				1	5.51218	5.87377	6.54766	6.76132	6.72723	6.79289	6.49069	6.95413	7.31162	7.20788	7.13471	7.02796	7.08763	7.17963	7.00543	6.99943	7.22298	7.27218	7.20831	6.85063	6.22049	6.15908	6.64729	6.51508	6.83225	6.8637	7.14833	6.93696	7.01934	7.16719	6.94036	7.00068	7.17409	7.36082	7.40518	7.17941	6.93931	7.14878	6.99742
2	euxassay_014187_11.jpg	NM_019796	56403	Syncrip	2610109K23Rik|4632417O19Rik|GRY-RBP|Nsap1|Nsap1l|pp68	7569				1	4.22623	4.29861	4.29861	4.14701	4.47355	4.26565	4.38298	4.69908	4.80418	5.18886	4.93133	5.14725	5.56911	5.19835	5.78751	5.53921	5.04203	5.04689	4.88814	4.48624	4.07908	4.24325	4.15453	4.48552	4.21476	4.81846	4.73364	5.12751	4.96337	5.28175	5.43103	5.45863	4.99639	5.05623	5.00723	5.28997	4.98378	4.89139	4.70114
2	euxassay_001093_11.jpg	NM_028052	72003	Synpr	1500003F20Rik|SPO	7557				1	4.38716	4.54518	4.84647	4.83078	4.62531	4.36244	4.37176	4.79774	4.94343	5.32883	5.32643	5.33599	5.05372	5.16066	5.23745	5.16781	5.15437	5.09745	4.75563	5.01061	4.45743	4.2889	4.45743	4.71471	4.57374	4.53968	4.82627	4.71471	4.87516	5.16245	5.17404	5.11698	5.27602	5.11606	4.90756	4.81264	4.9835	4.80578	4.73351
2	euxassay_003004_11.jpg	NM_028052	72003	Synpr	1500003F20Rik|SPO	7557|7558				1	4.84554	4.31732	4.39048	4.80597	4.46253	4.50315	4.44914	4.59224	4.80502	5.30632	5.56792	5.3557	5.06046	5.04209	5.2074	5.07385	5.08334	4.83191	4.88061	4.70121	4.84925	4.69277	4.66249	4.6751	4.57441	4.63588	4.78093	4.53	4.76037	5.29738	5.14715	4.90006	4.74372	4.95588	5.19695	5.04111	5.02742	4.79196	4.73049
2	euxassay_003324_11.jpg	NM_011524	21335	Tacc3	Aint|C86661|Eric1	7569				1	5.43807	5.56132	5.50666	5.76842	5.73088	5.66795	6.29723	6.38807	7.05598	6.90633	6.95727	7.13771	6.91618	6.90793	7.15311	6.81532	6.40784	6.74943	6.6753	7.27517	5.28299	5.41533	5.44875	5.5594	5.28942	5.25709	5.53391	6.18008	6.13518	6.73753	7.0966	6.86924	7.24368	7.32571	6.93176	6.79005	6.51128	6.15736	6.43663
2	euxassay_013949_11.jpg	NM_009315	21343	Taf6	80kDa|AW549759|TAF(II)80|TAFII70|Taf2e|p80	7569				2	3.799	3.76403	3.97649	4.07679	4.27858	4.5324	4.21785	4.65454	4.63403	4.69842	4.96205	4.56493	4.72199	4.7431	5.05539	5.0638	4.17678	4.25443	4.30599	4.16119	3.96627	3.92676	3.6435	3.61238	3.85767	4.39134	4.70335	5.00236	4.29501	5.37648	4.8112	5.06404	4.67099	4.87814	4.38061	4.29786	4.18121	3.8856	4.34002
2	euxassay_013949_14.jpg	NM_009315	21343	Taf6	80kDa|AW549759|TAF(II)80|TAFII70|Taf2e|p80	7569				2	3.87093	4.33398	4.04934	4.00344	4.07016	4.13698	4.30859	4.14607	4.26339	4.72394	5.4485	4.74402	4.27999	4.4595	4.3511	4.44117	4.22391	4.37936	4.04837	4.18507	3.86361	4.31933	4.35502	4.20085	4.37704	4.15209	4.33927	4.56711	4.34979	4.81597	4.76185	4.42136	4.3706	4.4424	4.81312	4.69638	4.47761	4.07904	4.0031
2	euxassay_001884_11.jpg	NM_178598	21346	Tagln2	2700094C18Rik|KIAA0120|SM22beta|Sm22B|Sm22a	7540|7569				1	4.98497	4.31669	4.34326	4.71992	5.23173	5.09537	5.1618	6.02733	6.59193	7.18929	7.18489	7.54905	7.06011	6.69196	7.08256	6.29158	6.74821	7.28027	6.72643	7.22562	4.13551	4.15514	5.29366	4.46197	4.9123	5.95423	6.41632	5.20663	6.72036	7.01889	7.29344	7.28044	6.94123	7.0671	6.39266	6.98069	7.20132	7.0683	7.22545
2	euxassay_006234_11.jpg	NM_033074	110960	Tars	D15Wsu59e|ThrRS	7569				2	4.7625	4.85495	5.38064	5.45743	5.18154	5.70491	4.95309	5.63727	5.95709	5.94152	6.3935	6.28872	6.6352	6.1146	5.89675	6.13709	6.40867	5.67938	5.82392	5.19385	5.40417	4.54399	5.3204	5.26242	5.06586	5.22004	5.20055	5.43043	5.41736	5.50997	5.70286	5.95105	6.31245	6.03657	5.94586	5.89828	5.71002	5.35932	5.49548
2	euxassay_006234_14.jpg	NM_033074	110960	Tars	D15Wsu59e|ThrRS	7569				2	5.03069	5.20856	5.02184	5.95314	5.55115	5.57219	5.83006	5.95055	6.03902	6.25465	6.15873	6.45614	6.26563	6.47608	6.36621	6.1853	5.69331	5.98348	6.2303	6.16868	4.1858	5.01492	4.89613	4.94169	5.05501	5.50106	5.75783	5.76316	5.93124	5.75665	6.30498	6.27259	6.19988	6.3426	6.52738	6.00548	5.99043	5.74474	5.88262
2	euxassay_019472_11.jpg	AK052583	21416	Tcf7l2	TCF4B|TCF4E|Tcf-4|Tcf4|mTcf-4B|mTcf-4E	7569		mouseTF		1	6.10711	5.92386	6.19579	6.1317	6.1005	6.16149	6.09387	6.20429	6.20603	6.31716	6.5519	6.6072	6.55973	6.7152	6.44483	6.49616	6.40679	6.46347	6.3474	5.67438	6.35277	6.314	6.22965	6.21749	6.17782	6.09621	6.12979	6.36423	6.37238	6.49154	6.35603	6.1995	6.25219	6.36033	6.36889	6.46129	6.34936	6.32677	6.18592
2	euxassay_004972_11.jpg	NM_011565	21677	Tead2	ETF|Etdf|TEAD-2|TEF-4|TEF4	7569		mouseTF		1	5.0347	5.29637	5.37186	5.3602	5.28887	5.67351	6.30414	6.59966	6.94275	6.93622	6.85546	7.07425	7.02074	7.00064	7.07881	6.92724	6.65638	7.08275	6.84388	6.6412	5.07964	5.31326	4.79689	5.05091	5.30247	5.42631	6.04887	6.60899	6.57156	6.91002	7.13349	6.99751	7.2224	7.27061	7.15858	7.13025	7.07247	7.15858	6.76526
2	euxassay_001485_11.jpg	NM_146151	230661	Tesk2	MGC29168	7569				1	4.94143	4.9833	5.42402	5.43994	5.33208	5.58868	5.82192	5.96186	6.3857	6.81242	7.15165	6.85735	6.11111	6.58153	6.65495	6.64724	6.37526	6.44591	6.29587	6.43484	4.9189	5.18875	5.26041	5.23083	6.06465	5.68708	5.64239	5.96736	6.73778	6.61466	6.78048	6.79293	6.69341	6.94938	6.46055	6.53734	6.58904	6.5359	6.42896
2	euxassay_004973_11.jpg	NM_028602	73679	Tex19.1	2410081M02Rik|Tex19|Tex19a	7557				1	4.33545	4.66209	4.6726	4.44622	4.6903	4.66651	4.58604	4.65256	4.86659	4.95606	4.93106	5.2836	4.91308	5.04129	5.00979	4.93526	4.81285	4.80828	4.94466	4.72223	4.88641	4.66103	4.56723	4.63223	4.68408	4.76393	4.74114	4.95606	5.11345	5.22394	4.92051	5.00281	5.15002	5.12819	5.03543	4.87753	4.85555	4.88731	4.97453
2	euxassay_002182_14.jpg	NM_009360	21780	Tfam	AI661103|Hmgts|mtTFA|tsHMG	7569		mouseTF		1	4.03102	3.87589	4.31225	5.37541	5.32831	5.44992	5.14928	5.64641	5.77317	5.58829	6.0405	5.92282	6.28622	6.33866	6.10013	5.77726	5.81135	6.84018	5.70535	5.40068	3.77021	4.01954	4.12129	4.786	4.51047	4.91646	5.59317	5.89112	5.68431	5.58762	6.1034	6.24919	5.72003	6.06321	5.94485	5.84576	6.22324	5.87337	5.50743
2	euxassay_005104_11.jpg	NM_018783	54723	Tfip11	2810002G02Rik|AF097181|AW046167|Srr1|TIP33|Tip39	7469				1	4.38426	4.65735	4.9146	4.91194	5.06584	5.12062	5.42669	5.60688	5.71256	6.28461	5.77097	5.88837	5.86885	5.77585	5.89647	5.96094	5.82701	5.31757	5.07759	5.12614	4.56443	4.56555	4.79267	5.19032	5.24207	5.1682	5.34491	5.43721	5.66806	5.98011	5.43844	5.71764	5.91075	5.90586	6.19044	5.87705	5.95242	5.70755	5.44814
2	euxassay_007804_14.jpg	NM_009372	21815	Tgif1	AA959811|AI462167|Tgif	7569		mouseTF		1	4.06381	3.92507	4.09228	4.02495	3.98299	4.21302	4.63299	4.63299	4.92131	4.81371	4.78026	4.99655	5.33275	4.95581	5.03812	5.47434	5.16507	4.82506	5.16418	4.9702	4.12143	4.03117	3.96941	4.46412	4.06572	4.25895	4.34508	4.46025	5.1722	5.27265	5.09457	5.03421	5.11044	4.51736	5.16953	5.16239	4.91282	5.17309	5.27679
2	euxassay_012675_14.jpg	NM_021513	59016	Thap11	2810036E22Rik|AB041579|CTG-B43a|CTG-B45d|Ronin	7569				1	4.988	5.11369	5.09427	4.95565	5.09349	5.24136	5.24418	5.11446	5.31837	5.20778	5.3177	5.37097	5.38357	5.22116	5.16061	5.5993	5.83882	5.25093	4.70237	4.60956	5.06344	5.03683	4.89229	5.11446	5.16746	4.98378	5.22717	5.33104	5.51756	5.32971	5.76558	5.82305	5.53506	5.18461	5.11877	5.33356	5.28669	5.1002	4.84194
2	euxassay_013737_11.jpg	XM_287555	330267	Thsd7a	Gm837	7557				1	4.67158	4.74992	4.69405	4.73435	4.71128	4.80944	4.90564	5.11532	4.94364	5.19187	5.16084	5.2708	5.38357	5.23613	4.96689	5.05632	5.18197	4.78698	4.96175	4.65958	4.29576	4.41177	4.70515	4.66148	4.60595	4.73916	4.61121	4.89382	4.76886	4.90242	5.1671	4.85889	4.97583	5.26352	5.04301	5.02466	4.84808	4.58807	4.06336
2	euxassay_001794_14.jpg	NM_025372	66131	Tipin	1110005A05Rik|1110018P21Rik	7569				2	3.92557	4.18109	4.45036	4.18844	4.39175	4.06936	4.40946	4.63588	5.4047	5.21058	4.99963	5.78211	4.79831	5.28715	5.47727	4.68032	5.25183	4.70244	4.30033	3.99926	4.13448	4.13056	4.13969	3.95121	4.31866	3.94997	3.94304	3.92028	4.2289	5.11205	5.74673	5.47906	5.35465	5.08633	5.20334	5.09573	5.12052	4.84275	4.38025
2	euxassay_012505_14.jpg	NM_028411	72982	Tmem138	1700113I01Rik|2900055D14Rik|MGC129472	7569				1	3.72107	3.45275	3.28198	3.35542	3.65807	3.55954	3.71615	4.08066	3.97928	4.09324	4.19009	4.43701	4.05357	4.45662	4.70011	4.70627	3.87753	4.14852	3.99612	4.10726	3.15405	3.40814	3.53209	3.73145	3.70389	3.6874	3.76216	3.83135	4.04064	4.24467	4.04226	4.1455	3.98436	4.24467	4.38041	4.24748	4.21476	4.24043	4.2061
2	euxassay_011646_14.jpg	XM_147067	245020	Tmem22	Gm519	7569				1	5.48818	6.42754	6.17942	6.05314	6.05556	6.03655	6.1345	6.17536	6.49027	6.6067	6.33446	6.20137	6.47684	6.47444	6.28598	6.56187	6.64591	6.39698	5.76312	5.47614	5.10362	5.33236	5.82428	5.86564	5.86885	6.21186	6.11381	6.5846	6.70907	6.40866	6.17314	6.23935	6.26806	6.38616	6.7627	6.33214	6.53446	6.23013	6.09752
2	euxassay_003576_14.jpg	NM_181401	100201	Tmem64	9630015D15Rik|AI790744|AV300874	7569				1	5.41654	5.41842	6.05263	6.12303	5.81136	5.64914	6.01408	6.01877	6.25118	6.29383	6.46975	6.69952	6.58229	6.60105	6.49587	6.47208	6.44736	6.04883	6.25987	6.17937	6.56589	5.81029	5.6579	5.78253	5.89388	5.50392	5.90161	5.91329	6.31239	6.44052	6.82277	6.52052	6.46846	6.30256	6.28505	6.509	6.34656	6.29413	6.48798
2	euxassay_011308_14.jpg	NM_177368	278279	Tmtc2	8430438D04Rik|D330034A10Rik|MGC116613	7469				1	7.00119	6.97848	6.91481	6.87417	6.73939	6.63842	6.78613	7.00077	7.22805	7.15794	7.06123	7.51697	7.38461	7.35355	7.41232	7.30795	7.08453	6.95176	6.68512	6.25364	6.97933	6.94895	6.9844	6.80178	6.71213	6.56441	6.80728	6.61735	6.86686	7.20433	7.30963	7.33716	7.33302	7.44074	7.10381	7.23108	6.85052	6.92254	6.86113
2	euxassay_002030_14.jpg	NM_016788	51789	Tnk2	ACK1|AW552477|Ack|Cdgip|MGC37479|Pyk1	7469				1	5.97596	6.07994	5.37883	5.19487	4.93328	5.47507	5.93507	6.09291	6.33585	5.90596	6.17507	6.14858	5.68063	5.74062	6.44629	5.83125	6.01598	5.14575	5.58301	5.11925	5.48763	5.70501	5.71521	5.35879	5.23798	4.99908	5.75286	6.16543	6.2563	6.07717	6.0403	6.20544	6.42294	5.87942	5.08187	5.42558	5.85747	5.31637	5.72737
2	euxassay_008190_14.jpg	NM_183091	72749	Tonsl	2810439M11Rik|Nfkbil2	7569				1	6.09258	5.60324	5.31123	5.40438	5.53458	5.631	5.34711	5.87903	6.81403	7.41942	7.50795	7.01826	7.0607	7.20574	6.82269	6.31303	5.85403	5.73929	5.55654	5.47672	5.87631	5.61528	5.44235	5.62397	5.73749	5.67715	5.65982	6.42752	7.39025	7.12834	7.37938	7.01847	6.55079	6.57789	6.19678	6.07794	6.26131	5.79866	5.83955
2	euxassay_012642_14.jpg	NM_133780	108989	Tpr	2610029M07Rik|C77892	7569				1	4.98379	4.45053	4.70934	4.98548	5.05624	5.26449	5.67436	6.02224	5.60195	5.45742	5.25192	6.40173	5.64529	5.67593	5.73179	5.73781	5.75572	5.46337	5.79955	5.34767	4.70115	4.58684	4.87692	5.0738	5.00807	5.10596	5.09115	4.90751	5.48094	5.51464	6.04103	5.86657	5.60962	5.36256	5.48034	5.74081	5.99736	5.75967	5.88928
2	euxassay_012323_11.jpg	NM_175113	66926	Trmt6	3300001M20Rik|AU016412|AW492787|CGI-09|mKIAA1153	7569				2	3.90142	4.06957	4.25939	4.22765	4.01979	3.96439	4.04307	4.16839	4.67628	4.69762	4.58763	4.9075	4.94664	4.86727	4.57231	4.6528	4.56942	4.40188	4.51337	3.79552	4.31077	4.12459	4.26043	4.15415	3.96951	4.16425	4.13261	4.34569	4.56809	4.48284	4.88665	4.65814	4.91615	4.76738	4.56362	4.74706	4.46545	4.69054	4.24406
2	euxassay_014270_11.jpg	NM_019634	21912	Tspan7	1200014P11Rik|A15|AI323365|Cd231|Mxs1|PE31|R74651|TALLA|Tm4sf2	7557				1	4.86277	4.83683	5.18705	5.43383	5.37839	5.48304	5.61972	4.84615	5.2096	5.19582	5.3046	5.79114	6.11864	5.96073	6.09343	5.53064	5.51728	5.48781	5.1983	5.36237	4.46211	4.98254	5.03563	4.98	5.25299	5.45103	4.93704	4.94573	5.41266	5.47105	5.18484	5.63593	5.77171	5.93956	6.02656	5.78902	5.50615	5.52089	5.42191
2	euxassay_012438_14.jpg	NM_001013026	74044	Ttf2	4632434F22Rik|8030447N19|AV218430	7569				1	3.99931	4.2819	4.01498	4.09219	3.99069	4.01781	4.28308	4.29284	4.47447	4.70398	4.44778	4.97766	4.71317	4.56529	4.67603	4.56754	4.66343	4.65921	4.29693	4.28601	4.01214	4.11616	4.29829	3.99788	4.0922	4.24131	3.84213	4.01072	4.28052	4.61628	4.08816	4.42806	4.60645	4.31045	4.65921	4.39415	4.23585	4.29011	4.37626
2	euxassay_000101_11.jpg	NM_133755	74237	Tubgcp2	1700022B05Rik	7537|7540				1	4.86423	6.13599	6.20149	6.27164	6.47273	6.42689	6.31698	5.62752	6.15905	6.45785	6.81155	6.7028	6.89554	6.64727	6.05198	6.11994	6.06042	6.16688	6.51023	6.37578	6.11671	6.36794	6.21666	6.39066	6.42986	6.35742	6.45347	5.98675	6.44393	6.34683	6.53386	6.55652	6.70403	6.58084	6.26248	6.31416	6.59517	6.54318	6.15793
2	euxassay_012641_14.jpg	NM_025299	27366	Txnl4a	D18Wsu98e|Dim1|ENSMUSG00000057130|Txnl4|U5-15kD|U5-15kDa	7569				1	5.23215	5.04979	5.10362	5.01551	5.32305	5.29134	5.17636	5.10129	5.58144	5.37419	5.43289	5.44765	6.75654	5.64742	5.69151	5.61246	6.10739	5.28915	5.30465	4.66747	4.92343	5.48273	4.86412	5.14347	4.854	4.74763	5.64101	5.8606	5.66648	5.99778	5.55952	5.38382	6.03655	5.56008	5.44336	5.34228	5.25682	5.5454	5.3996
2	euxassay_008886_11.jpg	NM_021288	22171	Tyms	Ts	7569				1	6.3436	4.44404	4.64	4.83981	4.46112	4.62816	5.54683	4.87901	5.40838	6.55225	7.08372	6.90827	7.31312	7.30483	6.53611	5.42415	5.4884	5.04552	5.06097	5.34354	5.32686	4.40296	4.46234	4.87301	4.7263	4.71516	5.31281	5.07118	6.00142	6.87501	6.57978	6.59809	6.91094	6.69493	6.36969	6.29571	6.45365	6.49298	4.72993
2	euxassay_004872_11.jpg	NM_026024	67196	Ube2t	2700084L22Rik|C80607	7569				1	4.57769	4.08287	4.08476	4.13489	4.19214	4.70237	5.21858	5.0604	5.78983	6.34482	5.86601	5.94359	5.80983	5.72144	5.31837	4.82224	4.69651	4.59901	4.45113	4.29044	4.47331	4.35609	4.0923	4.13489	4.17804	4.41138	4.49764	4.96406	6.05772	5.8094	5.49297	5.36346	5.53091	5.10673	4.92871	4.87509	4.69342	4.41964	4.25099
2	euxassay_003354_11.jpg	NM_145405	27643	Ubl4	DXHXS254E|DXS254E|DXS254Eh|Gdx|Ubl4a	7569				1	4.54377	4.84364	4.86213	4.98195	5.07524	5.14561	5.18727	5.52734	5.39455	5.53197	5.55488	5.54633	5.80091	5.40695	5.00726	5.1657	5.23203	5.34361	5.0241	4.72884	4.85014	4.87403	4.96494	4.71629	4.90289	5.1441	5.21343	5.48084	5.5429	5.58135	5.53428	5.70245	5.64338	5.28644	5.27738	5.33172	5.15494	4.83712	5.01917
2	euxassay_011648_14.jpg	NM_019562	56207	Uchl5	5830413B11Rik|Uch37	7569				1	5.87887	5.85507	5.71205	5.75572	5.86152	5.86198	6.00778	6.03248	6.38871	6.37371	6.27863	6.58815	6.61162	6.38795	6.22992	6.32815	6.50835	6.33968	6.39253	5.76646	5.9575	5.87113	5.70387	6.02806	5.71307	5.62811	5.62226	5.93209	6.54452	6.20623	6.20101	6.48491	6.4781	6.43206	6.3519	6.0778	6.26494	6.20362	5.98619
2	euxassay_012321_14.jpg	NM_033509	93840	Vangl2	C530001F03Rik|Lp|Lpp1|Ltap|Vang1l2|loop-tail|ska17|ska<m17Jus>|stbm|strabismus	7469				1	3.92227	4.48791	4.90125	5.05623	4.63063	5.67644	6.09986	5.75325	5.64294	6.01424	6.62565	6.0256	6.51992	5.84776	5.44447	6.17595	6.29261	5.93942	5.37972	5.75522	4.11344	4.36753	4.86412	4.76444	5.19908	5.49936	5.3606	5.57361	5.55895	6.05153	5.64742	5.92137	5.98349	5.7577	5.9174	5.85968	5.71795	5.72887	6.46291
2	euxassay_012406_11.jpg	NM_172598	218973	Wdhd1	A630092E18|AND-1|D630024B06Rik	7569				2	3.98726	4.01892	4.08495	4.10527	4.11363	4.38621	4.61929	4.60487	5.10341	5.49328	5.37311	5.7249	5.34578	5.58496	5.00401	4.53052	5.09123	4.38774	3.97983	4.40297	3.92355	3.81574	3.86241	3.8897	4.20859	4.40902	4.78195	5.18939	5.14115	5.73697	5.42478	5.46089	5.48256	5.63292	4.56208	4.70782	5.06274	4.51518	4.34893
2	euxassay_012406_14.jpg	NM_172598	218973	Wdhd1	A630092E18|AND-1|D630024B06Rik	7569				2	4.06481	4.20613	4.01115	4.08385	4.21767	4.3789	4.59063	4.74207	4.84828	4.89428	4.92626	4.9231	4.83935	4.73125	4.65694	4.54604	4.47429	4.39879	4.28499	4.16144	4.05842	4.17393	4.17245	4.15606	4.21939	4.36963	4.55561	4.65312	4.82471	4.89966	4.92415	4.99624	4.80421	4.71425	4.61176	4.60651	4.46561	4.40183	4.30135
2	euxassay_016462_11.jpg	NM_009516	22390	Wee1	Wee1A	7569				1	4.07365	3.95758	4.08719	4.24406	4.16797	4.28497	5.14272	5.28107	5.54242	5.37677	5.53495	5.11215	4.86687	4.46268	4.9804	4.90304	4.67941	4.94788	4.14852	3.64318	3.89431	3.86475	3.86632	4.09659	4.08853	4.93745	5.14951	5.18446	5.37998	5.67016	5.83227	5.19325	5.31837	4.9418	5.03276	4.88507	4.53361	4.35583	4.2205
2	euxassay_005059_11.jpg	NM_207301	71446	Wrb	5530402J05Rik|C030018G21Rik|Chd5|MGC98437	7469				1	5.75255	5.99501	5.76498	5.44704	5.50608	5.25388	5.3801	5.75789	6.0454	6.23567	5.7454	6.38008	5.78416	6.15192	5.98417	5.66285	6.0654	5.87914	5.72402	5.37875	5.27307	5.3654	5.24376	6.02978	5.73038	5.56415	5.65794	5.95164	5.98796	6.69025	6.31472	6.01151	6.04588	5.89996	6.14299	5.89297	5.90959	5.44557	6.04673
2	euxassay_005031_11.jpg	NM_019653	78889	Wsb1	1110056B13Rik|2700038M07Rik	7469				2	4.98851	5.58901	5.30262	4.91867	5.01849	5.17828	5.55816	5.56607	5.71235	6.14654	6.05596	6.086	6.18141	6.268	6.09869	5.65019	5.35748	5.71693	5.247	4.89929	5.49854	5.09004	4.81714	4.7522	4.98598	5.02343	5.22117	5.82739	6.26306	6.35927	5.79696	5.77663	5.72605	5.50808	5.37303	5.44177	5.51019	5.31623	5.06073
2	euxassay_000126_11.jpg	NM_178395	70546	Zdhhc2	5730415P04Rik|6430583A19Rik|MGC156396	7557				1	4.96749	5.01685	5.32266	4.82998	4.60607	4.66412	4.82207	4.93222	5.15283	5.60481	5.66101	5.82946	5.89018	5.58891	5.27957	5.2377	5.27957	5.12554	4.90118	4.81554	5.18491	5.20243	5.23939	4.96441	4.79922	4.77132	4.77014	4.66539	4.71506	4.83897	5.50456	5.90203	5.81074	5.79466	5.63802	5.2663	4.9777	4.776	4.78184
2	euxassay_000250_11.jpg	NM_183014	193452	Zfp184	4930500C15Rik|MGC62472	7538				1	5.60957	5.94546	5.87401	5.86688	5.81941	5.88381	6.06233	5.74963	6.05029	6.10487	6.21773	6.51102	6.30971	5.7877	5.98851	5.5654	5.46463	6.17255	5.74425	5.51546	5.65418	5.78261	5.91177	5.6401	5.59306	5.92291	5.98699	6.35016	6.41284	6.581	6.25262	6.3087	6.08234	6.27267	6.12109	6.18086	5.91868	6.00483	5.76209
2	euxassay_006592_14.jpg	NM_027248	69890	Zfp219	2010302A17Rik	7569				1	6.1138	6.5139	6.40651	6.46937	6.53099	6.84448	7.02147	6.91817	6.92847	7.15124	7.17056	6.83931	6.6936	6.9678	7.13878	7.02277	7.08902	6.8344	6.95591	6.73294	6.15442	6.33564	6.41405	6.31887	6.26026	6.71741	7.07785	7.1967	6.95326	6.89862	7.11989	7.01937	6.98182	6.70977	6.9913	6.94163	6.8522	6.35672	6.12773
2	euxassay_003232_11.jpg	NM_172385	243937	Zfp536	9630010P11Rik|Znf536|mKIAA0390	7469				1	6.03912	5.59059	5.81787	5.54227	5.98229	6.489	6.86405	6.3909	6.59751	6.73047	6.97837	6.40817	6.51982	6.58416	6.61692	6.47126	6.42164	6.61393	7.06172	6.61883	5.31609	5.96553	5.93067	5.78003	5.67817	6.54795	6.50271	6.65704	6.508	6.58492	7.17593	6.13868	5.80031	6.05212	6.30247	6.47367	6.58472	6.7224	6.49278
2	euxassay_007349_14.jpg	NM_177684	232337	Zfp637	AI646709|BC021601|MGC54806|Znf32	7569				1	6.02382	5.9098	5.59966	5.75416	5.73994	6.32351	6.45101	6.69115	6.87691	6.42624	6.42773	6.38195	6.5443	6.9668	6.88588	6.57657	6.70627	6.44513	6.15828	6.33308	6.21289	6.31347	5.55319	5.74233	6.33229	5.75841	6.33109	6.42363	6.80476	6.81305	6.45394	6.25757	6.31467	6.40143	6.50036	6.63773	6.75249	6.76522	6.73905
2	euxassay_004940_14.jpg	NM_028543	73451	Zfp763	1700065O13Rik|AI839635	7469				1	6.26202	5.9829	6.66741	6.00503	6.02683	5.89081	6.2021	6.61244	6.51379	6.48079	6.55666	6.32035	6.7685	6.28789	6.57089	6.31915	6.19205	6.00852	6.98744	6.82048	5.87669	5.7959	6.31633	6.25972	6.48473	6.4248	6.41281	6.46491	5.84525	6.56243	6.62646	6.82586	6.41168	6.34698	6.20384	6.26972	5.93654	5.95086	5.98859
2	euxassay_012753_14.jpg	NM_029869	74570	Zkscan1	5930429A01Rik|9130423L19Rik|9230118B16Rik|AI646829|AI788588|C87323|KOX18|MGC63357|PHZ-37|ZNF139	7469				1	3.72363	4.14956	4.48754	4.49467	4.83792	5.35061	4.65065	5.14626	5.45175	5.66	5.49267	4.88389	5.49682	5.01691	4.84909	5.41777	4.74134	4.62252	4.65087	4.24198	4.19695	4.91699	4.60966	4.57309	4.47318	4.77002	4.94848	5.03577	5.62253	5.44869	5.50449	5.45174	5.11129	5.37888	5.5515	5.12514	5.00548	4.37153	4.53395
2	euxassay_012619_14.jpg	XM_001003255	99334	Zscan29	AW125441|MGC117957|Zfp690	7569				1	4.39863	4.25729	4.18485	4.32055	4.32741	4.25729	4.77911	4.74365	4.82022	4.8499	5.38071	5.01693	5.07786	5.55984	5.25202	4.94441	4.7445	4.70817	4.53625	4.20734	4.31983	4.53908	4.3399	4.92871	4.82669	4.63632	4.49723	4.97313	5.00771	5.4373	4.82103	5.52346	5.01764	5.49582	5.53733	4.94292	4.80637	5.23388	5.64055
2	euxassay_019218_14.jpg	MIMAT0000210	na	mmu-miR-181a					miRNA	1	4.36533	4.50298	4.6991	4.45158	4.31444	4.27516	4.15584	4.7143	4.35567	4.6646	4.41573	4.71938	4.80023	4.35305	4.16182	5.07131	4.55522	4.42322	4.43315	4.5102	3.795	4.41322	4.25291	4.26269	3.98751	4.54953	4.76136	4.3025	4.29299	5.06892	4.85849	4.72242	4.3025	4.71532	5.02529	5.38693	5.23348	4.68863	4.41948
2	euxassay_019064_11.jpg	MIMAT0000367	na	mmu-miR-291a-5p		7538|7540|7569			miRNA	1	5.46187	5.76934	5.84906	6.0573	6.11805	6.04116	6.32149	6.39613	5.93308	6.77324	6.71136	6.93074	7.25471	6.77455	6.46207	6.32316	5.64822	5.68218	5.59574	5.44106	5.84472	5.67453	5.72153	5.69771	6.50113	6.78428	6.06955	6.76344	6.243	6.5527	6.57435	7.09165	6.86411	6.99736	6.47233	6.388	6.25972	5.88261	5.60935
2	euxassay_019065_11.jpg	MIMAT0003189	na	mmu-miR-291b-5p		7540|7569			miRNA	1	6.07263	6.24209	5.40226	5.46621	5.68608	5.94183	5.94931	6.02111	6.85831	6.2078	6.58658	6.89939	6.69973	6.39933	6.42728	6.68178	6.47285	6.02757	5.83762	4.96288	5.62689	5.91618	5.54385	5.49759	5.8741	6.19391	6.24394	6.5016	6.45941	6.97917	6.62049	7.09599	6.98051	6.48951	6.87228	6.89843	6.29091	6.04917	5.65107
3	euxassay_000104_11.jpg	NM_027269	109065	1110034A24Rik	2810020C19Rik|AV032410|Dnaaf2|Ktu|TU54|mknt	7540				1	5.37162	5.80339	5.90586	5.81672	5.91076	5.76214	5.70541	5.51698	5.36126	5.54185	5.77342	5.71765	6.33512	6.15038	5.7463	5.58868	5.52396	5.0498	5.01833	4.76837	5.3787	5.47915	5.64529	5.9618	5.89648	5.76115	5.7146	5.56292	5.22074	5.71307	6.05379	5.86812	5.9967	6.00421	5.70746	5.35474	5.14242	5.3796	5.50491
3	euxassay_004907_14.jpg	NM_197990	69399	1700025G04Rik	2610510E02Rik|2900042O04Rik|ENSMUSG00000073540|MGC14005	7469				1	5.66537	5.69868	5.84529	6.09787	6.06312	5.7125	5.59361	6.33608	6.4149	6.22902	5.95315	6.14128	5.72063	5.57635	5.67115	5.34049	4.91893	4.91893	4.20218	2.9018	5.92353	5.9566	5.99438	6.17754	6.05391	5.84529	5.59084	5.70073	5.91823	6.40831	5.87291	6.08926	6.24461	5.99857	5.77531	5.84873	5.4582	5.23293	5.10928
3	euxassay_014537_11.jpg	XM_992800	68190	5330426P16Rik	-	7557				1	4.44982	4.75979	5.01834	4.72457	4.83727	5.27003	5.57473	5.33303	5.16969	4.5313	4.53822	4.68357	4.3727	4.59017	4.59238	4.58683	4.25869	4.6898	4.67314	4.85307	4.73464	4.75061	4.80705	5.20198	4.94528	5.22502	5.27763	5.56404	5.97969	4.65098	5.06504	4.45174	4.15303	4.46752	4.37399	4.32284	4.66684	4.98125	4.37476
3	euxassay_015891_11.jpg	AK018398	66804	8430408J09Rik	-	7538				1	3.77727	4.39971	4.81778	4.90138	5.1298	5.14649	4.93309	4.7859	4.68358	4.48791	4.36104	4.4554	4.61327	4.82413	4.35714	4.48314	4.12114	3.98604	4.24748	3.71003	4.1362	3.49398	4.4952	4.86883	4.87431	5.1044	5.11137	4.74962	4.80896	4.87236	4.44685	4.57455	4.47235	4.13185	4.58015	4.59901	4.2376	4.58572	3.85
3	euxassay_009333_11.jpg	XR_005251	109202	A930024E05Rik	-	7538				1	4.22535	4.54079	4.54276	4.30783	4.66665	5.04479	5.33357	5.42843	5.32092	4.89661	4.94685	4.90733	4.79826	4.65078	4.63258	4.58663	4.48172	4.51598	4.34248	4.30377	3.84355	4.34624	4.32583	4.23875	4.71482	5.11178	5.6537	5.53022	5.68676	5.60952	5.15162	4.79345	4.55401	4.50544	4.68753	4.86853	4.76228	5.42097	4.4144
3	euxassay_005035_14.jpg	NM_133886	100317	AU040320	A730047D20Rik|Kiaa0319l	7469				1	6.12771	6.2058	5.54746	5.81453	5.46784	5.62421	5.49155	5.62681	5.753	5.93824	5.84302	6.49783	5.47974	5.22073	5.40415	5.59284	5.25472	5.13209	4.87646	4.49799	6.15406	5.61377	5.05269	5.08611	5.94567	5.52187	5.99074	6.0678	6.14492	5.89916	6.15564	6.12208	6.06875	6.02696	6.06756	5.85068	5.66016	5.47344	4.96509
3	euxassay_012478_14.jpg	NM_025857	66939	Aagab	2310007F21Rik|p34	7569				1	5.53033	5.5029	5.47914	5.31031	5.261	5.30153	5.52338	5.53852	5.28751	5.64806	5.78693	5.94567	5.71734	5.50007	5.24756	5.28175	5.20735	5.31193	5.07949	4.94649	5.36514	5.4653	5.51288	5.34885	5.17488	6.03003	5.78751	5.31837	5.39428	5.26768	6.09432	5.83265	5.22973	5.68343	5.216	5.29896	4.93815	5.05269	4.82168
3	euxassay_012625_14.jpg	NM_019816	56321	Aatf	4933415H02Rik|5830465M17Rik|Che-1|MGC35916|Trb	7569				1	4.97616	4.69187	4.8438	5.90363	5.16597	5.18078	4.75358	4.92431	4.8438	4.8838	4.73765	5.04979	4.81258	4.962	5.16329	4.82167	4.86852	4.77794	4.55877	4.47619	4.53592	4.59017	4.9418	5.49166	5.52975	4.92695	5.22288	4.70011	4.80801	4.86962	4.92555	5.16687	5.15971	5.59267	5.00457	4.96097	5.07759	5.09458	4.88706
3	euxassay_012296_14.jpg	NM_008992	19300	Abcd4	P69r|P70R|Pxmp1l	7538				1	3.68592	3.67341	3.87571	3.94723	4.35788	4.62631	4.49148	4.68357	4.10415	4.23477	3.7483	4.10571	4.12421	4.08224	4.38809	3.91166	4.01277	3.55728	3.6346	3.63889	3.71236	3.82975	3.9502	4.14399	3.98098	4.17834	5.13133	4.89767	4.31615	4.75061	4.73464	4.48194	4.66579	4.16052	4.26426	4.19885	4.14852	4.04064	3.69979
3	euxassay_002477_11.jpg	NM_153420	235534	Acpl2	9430094M07Rik|BB177120|C130099A20Rik|DKFZp434B2119|MGC38214	7469				1	5.71814	6.43435	6.26513	6.58674	6.69192	6.72802	6.86122	6.63385	6.43037	6.59671	5.47725	5.10516	6.19263	6.10218	5.61343	5.57416	5.18885	4.70112	4.42833	4.42957	5.79191	6.44332	6.15	5.82757	6.34172	6.79168	6.8648	6.58487	6.61298	6.31008	6.15263	5.80337	6.1631	6.40267	6.07629	5.34818	5.02702	4.59457	4.74263
3	euxassay_019454_11.jpg	NM_007441	11694	Alx3	-	7538|7557		mouseTF		2	4.44071	4.55423	4.80036	5.40036	5.42793	5.5029	5.148	4.78105	4.7994	4.88326	5.00057	5.17266	5.1615	5.20778	5.33832	4.90215	4.64138	4.59238	4.53822	4.34667	4.63816	4.74564	4.53822	4.83259	5.1359	5.14498	5.26726	5.12751	5.15252	4.93658	5.01552	5.17266	4.84473	4.87782	4.92871	4.73163	4.82224	4.74065	4.53822
3	euxassay_019454_14.jpg	NM_007441	11694	Alx3	-	7538|7557		mouseTF		2	5.13095	5.15139	4.95994	5.59946	5.8465	5.80482	6.08143	6.37976	6.60834	6.49027	6.07985	6.21186	5.94411	5.79811	5.73229	5.75523	5.76508	5.41421	5.31971	5.20706	5.09973	5.00681	5.26518	5.35506	5.56602	5.73831	6.24817	6.59514	6.53418	6.2767	6.15901	6.03655	5.97247	6.04143	5.85276	5.62378	5.582	5.47794	5.51931
3	euxassay_012266_14.jpg	NM_181416	228482	Arhgap11a	6530401L14Rik|mKIAA0013	7569				1	4.77561	5.77654	4.62133	4.55469	5.17221	5.28464	5.61279	5.97579	5.70479	5.59831	6.44592	6.00454	5.73521	5.00607	4.93658	4.89409	5.28546	4.80515	4.43603	4.28141	5.40831	5.99653	5.83293	4.48696	4.19477	4.6993	5.9925	6.17218	6.17972	6.05556	5.37162	5.75493	5.54368	5.23528	4.51668	4.55946	4.11191	4.20958	4.59338
3	euxassay_010079_11.jpg	NM_028027	52666	Arhgef25	2410008H17Rik|D10Ertd610e|GEFT	7538				1	4.31711	4.50834	4.49521	4.65189	4.66819	4.71603	5.42349	5.44573	5.261	5.43253	5.11996	4.93695	5.25622	4.47784	4.56265	4.70817	4.67538	4.57118	4.15753	3.83323	4.35117	4.44036	4.52336	4.58858	4.79156	4.98836	5.52446	5.20871	5.33037	5.06629	5.10806	5.28528	5.13372	4.98691	4.55877	4.38773	5.01339	4.56893	4.33877
3	euxassay_000051_11.jpg	NM_177731	242574	C130073F10Rik	-	7536				1	5.9822	7.00417	6.62925	7.09725	6.64535	6.69292	6.24441	6.35155	6.2562	6.68547	7.1774	6.61002	6.47273	6.4846	6.99716	6.64632	6.68889	6.68328	6.35938	5.40802	5.74775	6.22547	6.36393	7.0366	6.96848	6.97571	6.43667	6.2863	6.97274	6.41115	6.4254	6.66918	6.60014	7.04334	6.51891	6.33774	6.69292	6.65111	6.06976
3	euxassay_011441_11.jpg	NM_009827	12425	Cckar	AW106902	7538				1	4.65311	5.0014	5.14347	5.10129	5.06344	5.09817	5.12215	5.39212	5.37548	5.82758	4.98951	4.9496	4.93605	5.08706	4.78377	4.94128	4.73404	4.94961	4.90215	5.14981	4.82884	4.64991	4.97021	4.91637	5.07379	5.22073	5.15026	5.25262	5.23144	4.94128	4.97837	4.84306	4.73404	4.77326	4.87509	4.89462	4.71585	4.96303	4.69373
3	euxassay_012172_14.jpg	NM_206535	271375	Cd200r2	AY230198|Cd200r1l	7469				1	6.01474	5.87642	6.06445	6.40469	6.77802	6.88795	6.86723	6.21316	6.22735	6.5458	6.53763	6.16069	5.70002	5.39846	5.45711	5.72675	5.29916	5.33336	5.148	5.16597	6.55068	6.41525	6.1684	6.16884	6.57274	7.02078	6.8058	6.54692	6.72476	6.48348	6.53348	6.65203	6.32716	5.83812	5.51435	5.43598	4.92871	5.07736	5.12407
3	euxassay_006695_14.jpg	NM_009878	12581	Cdkn2d	INK4d|p19|p19INK4d	7557				1	4.8729	5.07093	5.13255	5.20235	5.12292	4.89543	4.94701	4.92211	5.49404	5.43412	5.79979	5.5029	4.97913	5.1298	5.0352	4.93919	4.71188	4.63333	4.65258	4.62685	5.08422	5.00157	4.9804	5.36657	5.51136	4.88597	5.46802	5.04979	5.71077	5.4653	5.17931	5.09153	5.13209	4.76296	5.13779	4.81941	4.86275	4.78202	4.37205
3	euxassay_004982_14.jpg	NM_007684	12626	Cetn3	MmCEN3	7569				1	5.5011	5.44148	5.65324	5.84578	5.51168	5.70896	6.0255	6.17903	6.5445	6.47808	6.33649	6.36711	5.66961	6.5307	6.03783	5.70691	5.92416	5.49578	6.30561	5.21163	5.21926	5.59197	5.54239	5.46526	5.61177	6.0119	5.61614	6.38422	6.40833	6.26249	6.45962	6.36652	6.1299	5.86516	6.22154	5.96048	5.52798	5.4725	5.08952
3	euxassay_002048_11.jpg	NM_007693	12652	Chga	-	7469				1	5.33151	5.46141	5.18498	5.60712	5.95634	5.20064	5.05187	5.7603	5.64514	6.59442	6.7015	6.082	5.22349	5.24479	4.94093	4.63171	4.55763	4.77032	4.48672	4.51737	5.6924	5.59248	5.5029	5.44415	5.05256	5.38948	5.95523	5.54667	5.74629	6.34572	6.4302	6.07454	5.464	5.21981	4.85492	4.65946	4.71239	4.46147	4.54166
3	euxassay_009355_14.jpg	NM_030205	78885	Coro7	0610011B16Rik|AW048373|AW556392	7469				1	4.9917	4.84213	4.98564	5.06632	4.93832	5.17591	5.26198	5.17147	5.3729	5.35969	5.28765	5.09942	5.00773	5.11801	4.84771	4.70135	4.46777	4.2792	4.2479	4.30376	5.06727	5.25612	5.03047	4.77462	4.61371	4.71606	4.79093	5.11985	5.18652	5.29257	5.26532	5.07395	4.93937	4.92888	4.81619	4.80132	4.72821	4.67272	4.31669
3	euxassay_000876_11.jpg	NM_178576	54188	Cpsf4	30kDa|C79664|MGC36996	7569				1	5.71176	5.79727	5.71054	5.73663	5.69391	5.86594	5.99067	5.90231	6.00072	6.21957	6.36319	6.19659	5.94821	6.17545	5.95907	6.05862	5.71726	5.74353	5.58559	5.18185	5.71176	5.9836	5.99218	5.99872	6.03388	5.8156	5.86978	5.78743	5.76579	5.88993	5.90016	6.22858	6.20139	5.69391	5.63513	5.39951	5.46121	5.62673	5.49341
3	euxassay_007276_11.jpg	NM_012042	26965	Cul1	-	7569				2	5.33661	5.54421	5.78874	5.71843	6.22962	6.10862	6.35893	5.94044	6.61287	6.35991	5.95171	6.03759	5.90833	6.18147	5.71487	6.33265	6.20629	5.85809	5.30326	4.93881	5.07785	5.38344	5.2717	5.6547	6.19132	6.62629	6.56203	5.9374	5.78196	5.72248	6.25327	6.26235	6.15284	6.43994	6.1811	5.86085	5.80651	5.26556	5.37261
3	euxassay_007138_11.jpg	NM_178896	100737	Dcun1d4	AI836376|MGC117952	7469				1	6.87572	7.03796	6.3868	6.60571	6.3381	6.54932	6.84648	6.77861	6.81209	6.44278	6.5643	6.1675	6.15856	6.62589	7.03723	6.87462	6.91371	6.69328	6.72013	6.63882	6.48348	6.81437	6.62207	7.00039	6.74672	6.65235	6.66473	6.69815	6.59447	6.52585	6.80923	7.21843	7.47493	7.076	6.19095	7.00739	7.151	7.28387	6.92892
3	euxassay_001239_11.jpg	NM_176845	114874	Ddhd1	4921528E07Rik|9630061G18Rik|C85251|mKIAA1705	7539				1	6.22843	6.40779	6.48033	6.43954	6.8755	6.71753	7.04069	7.20267	7.01017	7.13882	7.03825	6.79867	6.47132	6.29595	6.56301	6.76576	6.56876	6.36059	6.42692	6.7372	5.75732	6.21411	6.50313	6.7411	6.53735	6.59851	6.62018	6.88013	7.0634	6.80126	6.88258	6.68549	6.62442	6.49391	6.49034	6.55212	6.34844	6.29595	6.25624
3	euxassay_003133_11.jpg	NM_176845	114874	Ddhd1	4921528E07Rik|9630061G18Rik|C85251|mKIAA1705	7539				1	6.22843	6.43213	6.39642	6.78933	6.76571	6.95913	7.19482	7.0815	7.08505	6.99668	6.84849	6.73389	6.50771	6.43732	6.59454	6.57584	6.63316	6.43843	6.44544	5.93324	5.88622	6.06486	6.41845	6.47961	6.43831	6.90932	6.99664	6.96854	6.71295	6.89071	6.70191	6.41119	6.53528	6.39718	6.47276	6.3049	6.12643	6.335	5.92165
3	euxassay_004956_14.jpg	NM_010051	13380	Dkk1	mdkk-1	7469				1	5.61918	5.55869	5.56491	5.48663	5.73808	5.58786	5.99004	5.98751	5.98709	5.93433	5.88184	5.70568	5.91365	5.58286	5.90208	5.76141	5.54959	5.32514	5.29361	5.21379	5.44868	5.59175	5.37196	5.7245	5.57559	5.60991	5.58953	5.65143	5.84234	5.83299	5.88319	5.89492	5.31672	5.30663	5.79018	5.65143	5.41204	5.395	5.28418
3	euxassay_001729_11.jpg	NM_134081	108671	Dnajc9	5330419I01Rik|AU020082	7569				1	5.20126	4.19039	4.18158	4.79767	4.76385	4.38246	6.15226	5.53229	4.74962	6.29669	6.01622	5.71977	6.22992	6.05194	5.04883	5.65889	5.2246	5.10207	4.728	5.42221	5.04592	4.37939	5.47578	5.54951	5.80482	4.68627	5.64998	6.00079	5.37432	4.90536	5.05848	5.75344	5.90986	5.04106	4.7826	4.72073	4.42487	4.96714	4.47186
3	euxassay_012633_14.jpg	NM_019819	56405	Dusp14	1110014C10Rik|2310042C07Rik|D11Ertd395e|MKP-L|Mkp6	7538				1	5.32638	5.44888	5.54643	5.96351	5.82475	6.28049	5.81054	5.93191	5.68478	5.38574	5.98434	5.71459	5.71916	5.12369	4.90215	4.97633	4.78958	5.42967	4.8397	4.97735	5.33964	5.25682	5.54814	5.86427	6.15639	6.07867	5.73229	5.88837	6.21941	5.44765	5.48452	4.82884	5.49818	5.83929	5.71429	4.99856	5.60062	4.94024	4.68003
3	euxassay_008076_11.jpg	NM_175528	243780	E330009J07Rik	AI841796|Lchn|mKIAA1147	7557				1	3.84914	3.86573	3.86573	4.71904	4.4597	4.6029	4.27966	4.87885	4.45653	4.57963	4.45945	3.94905	4.09501	4.012	4.13571	4.47971	4.34422	4.0415	3.88756	3.84357	3.75136	3.69471	3.93199	4.49922	4.42156	4.50629	4.29798	4.37725	3.99199	4.26806	4.58231	4.47971	4.07423	4.2846	3.95526	4.09876	3.85912	3.7394	3.49403
3	euxassay_012546_14.jpg	NM_198093	140580	Elmo1	6330578D22Rik|C230095H21Rik|CED-12|KIAA0281	7557				1	3.26493	4.25897	4.64715	4.8397	4.85085	4.68003	4.95685	4.22851	4.63816	4.50331	4.60429	4.8575	4.53269	4.92238	4.56555	4.39776	4.53407	4.30267	4.23406	4.06956	3.76805	3.96567	4.3356	4.36857	4.97123	5.25178	4.86632	4.85861	4.65607	4.66242	4.70114	4.66873	4.79536	4.80572	4.87618	4.874	4.74604	4.56285	4.52575
3	euxassay_008884_11.jpg	NM_010141	13841	Epha7	Cek11|Ebk|Ehk3|Hek11|Mdk1	7557				1	5.20387	6.07461	5.52506	5.81836	5.17575	6.06524	6.31887	6.35425	5.67602	5.76664	5.88755	5.7389	6.02601	5.83563	5.63574	5.19192	5.38394	5.20139	5.05074	5.55223	6.05649	5.372	5.92585	6.03325	5.28599	6.38877	6.3811	6.08662	5.89745	5.85838	5.98399	5.87121	6.1916	5.64645	5.60917	5.95715	5.3225	5.80681	6.06044
3	euxassay_010641_11.jpg	NM_146127	73847	Fam110a	1700008J10Rik|5430432M24Rik|AI747080|MGC30344	7557				1	3.8276	4.17242	4.2918	4.37399	4.33348	4.12421	4.99639	4.26565	4.34141	4.94441	4.64459	4.00614	4.36234	4.23619	4.44685	4.18423	4.32417	3.97589	4.35609	4.09042	3.92403	3.97759	4.1026	3.96396	4.48672	4.05678	4.60121	4.72356	4.64672	4.49976	4.39446	4.11961	4.03282	4.1239	4.16737	4.09418	4.46317	4.13854	3.86255
3	euxassay_001722_11.jpg	NM_026342	67726	Fam114a2	1810073G14Rik|9030624B09Rik	7558				1	4.31008	4.58264	4.23971	4.71213	4.29893	4.18678	4.76982	4.25238	4.2286	5.07737	4.57258	4.4812	4.36376	3.94913	4.38145	3.98427	4.28607	5.02418	3.83502	4.10497	4.1053	4.61898	4.86159	4.45233	4.37139	4.79097	4.52202	4.39539	4.76982	4.36848	5.20702	4.69609	4.09294	3.95061	3.8205	3.8478	4.34586	4.37484	3.63204
3	euxassay_013806_14.jpg	NM_053090	84652	Fam126a	AB030242|Drctnnb1a	7569				1	6.20983	6.05835	6.15014	5.76369	5.22228	5.40363	5.52626	5.31056	5.91216	5.8842	6.05112	5.98837	5.73989	6.44336	5.53907	5.47204	5.81727	5.53993	5.26042	4.9797	5.67046	5.50594	5.10422	5.82323	5.5942	5.43435	5.30002	5.55723	5.56605	6.22663	5.99693	6.1251	6.43625	6.76962	5.99492	5.17958	5.35824	5.95671	5.3555
3	euxassay_009161_14.jpg	NM_170755	227298	Fam134a	MGC47289	7469				1	5.98535	5.98788	5.92595	6.18766	5.86675	6.17736	6.29703	6.31493	6.40186	6.50606	6.27843	6.33472	6.49792	6.35875	6.36538	6.08703	5.88865	5.54986	5.15477	5.07617	6.42318	6.8308	6.24972	6.24232	6.55291	6.25847	6.11828	6.20036	6.47179	6.16192	6.22543	6.21985	6.43187	6.4833	6.52672	5.96146	5.66554	5.7454	5.38011
3	euxassay_016073_14.jpg	XM_988198	232035	Fam190a	6230405M12Rik|C130092O11Rik|MGC130404|MGC130405	7538|7557				1	4.57519	4.76622	5.1823	5.42921	6.10164	5.88072	6.45951	6.72742	6.59149	5.52458	5.52109	4.9031	5.39398	4.79094	4.63931	4.66752	4.40755	4.11157	4.15592	4.00006	5.33222	5.72014	5.83251	5.87214	6.58783	6.63422	6.94476	6.84331	6.12962	6.77302	5.38578	4.79425	4.8908	4.70751	4.99573	5.05892	4.33905	4.18642	4.27189
3	euxassay_007357_11.jpg	NM_029758	76820	Fam49a	2410157M17Rik|9630047E15|D12Ertd553e	7538				1	4.01672	4.02166	4.34521	3.95604	5.411	6.17809	6.95669	6.69415	6.36861	6.60598	6.39694	6.46006	6.88628	6.90824	6.04685	5.53402	5.14452	4.93517	4.43749	4.14003	3.93261	3.7421	3.99677	5.59968	6.68093	5.85294	6.18086	6.28474	6.5472	6.74622	6.34415	6.96366	6.52764	5.70765	5.32997	5.58166	5.43991	4.86539	4.95426
3	euxassay_000020_11.jpg	NM_175276	225288	Fhod3	A930009H06Rik|FHOS2|KIAA1695|mKIAA1695	7538				1	5.1133	5.17672	6.00091	6.16441	6.22102	6.27687	5.89759	6.03145	6.50432	6.08202	5.9452	5.57837	5.49255	5.52599	5.81363	5.51493	5.54133	5.47944	5.25352	5.29249	5.30458	5.72599	5.48243	5.72195	6.04568	6.09615	6.61966	6.33396	6.26303	6.00341	5.82263	5.79835	5.64491	5.52541	5.67095	5.59073	5.30957	5.2451	5.03332
3	euxassay_009145_14.jpg	NM_025638	66569	Gdpd1	2610020H15Rik	7469				1	6.72302	6.40366	6.51967	6.85018	6.311	7.00271	7.02848	7.12672	6.59456	6.53046	6.83958	5.9954	6.38153	6.16383	6.16996	6.43744	6.29619	5.79591	5.83294	5.55635	5.71557	6.14922	6.39187	6.42359	6.64027	6.63802	6.4473	6.65498	6.87087	6.53738	5.97872	6.30331	6.17074	5.83897	5.96133	6.21414	6.59953	5.96954	5.65461
3	euxassay_001861_11.jpg	NM_177266	320806	Gfm2	6530419G12Rik|A930009M04Rik|EFG2|MST027	7469				1	6.34186	6.6948	5.96283	5.83453	6.38693	6.28947	6.62284	6.62154	6.58293	6.32989	6.50953	6.48861	6.66578	6.60088	6.5769	6.71575	6.52353	5.46809	5.97112	6.421	6.47642	6.90285	6.36881	6.02921	5.78655	6.48897	6.67303	6.28208	6.02774	6.36804	6.56137	6.96807	6.38961	6.56611	6.44218	6.49751	6.33029	5.95402	5.89733
3	euxassay_013785_11.jpg	XM_978673	268729	Gm626	ENSMUSG00000071536|Frmpd2|Gm1582	7469				1	6.91769	7.15033	7.26211	6.82515	6.8866	6.99009	6.73232	6.94344	7.0876	6.99135	7.14733	7.1872	7.04301	7.06323	7.08995	7.14903	7.09699	7.0222	6.90871	6.78189	6.65998	7.29167	7.01806	6.94994	6.96131	6.90008	6.81123	6.92562	7.00689	7.11214	7.28911	7.24699	7.24012	7.07932	6.97169	7.11734	7.1681	6.9047	6.92924
3	euxassay_013652_14.jpg	NM_020567	57441	Gmnn	AW546347|Gem	7569				1	6.83983	6.91082	6.7752	6.63278	6.65097	6.43175	6.76443	6.73237	6.85653	7.09535	7.09512	6.81437	6.54555	6.75179	6.76776	6.60373	6.54417	6.62954	6.55478	6.11343	6.66762	6.72582	6.47203	6.45447	6.43731	6.41118	6.68642	6.60807	6.74438	6.81133	6.75357	6.95089	6.77422	6.67783	6.87189	6.88416	6.83277	6.28564	6.48956
3	euxassay_002196_11.jpg	NM_010324	14718	Got1	AI789014|Got-1|cAspAT	7469				1	4.53001	4.65934	4.47341	4.26619	4.74851	4.96028	4.91848	5.1012	5.16738	5.10819	4.68605	4.54211	4.76334	4.5643	4.27035	4.09853	4.21747	4.0915	3.84886	3.93523	4.58114	4.48061	4.34915	4.43317	4.42573	4.48061	4.78966	5.02939	4.8381	4.83248	4.65458	4.53694	4.53521	4.42759	4.10553	4.09619	4.22392	4.17817	4.09071
3	euxassay_011476_11.jpg	NM_023122	14758	Gpm6b	AI593561|Gpm6|M6B	7557|7569				1	5.97332	5.83602	6.92672	6.8307	6.93744	6.73212	7.02374	6.37622	6.44008	6.9844	7.10633	6.58682	6.92826	6.61031	6.8686	6.39558	6.4516	6.51046	6.57308	6.81807	6.06397	6.32349	6.42399	7.2484	7.30136	7.10711	6.85191	7.13151	6.4402	6.87899	6.8277	6.71136	6.91397	7.02177	6.85952	6.53244	6.57038	6.25658	6.67198
3	euxassay_002140_14.jpg	NM_153410	67839	Gpsm1	1810037C22Rik|AW107933|Ags3	7469				1	5.89567	5.95889	6.15197	6.12121	6.10616	5.67656	5.81302	6.23021	5.31785	5.6729	5.85886	5.95501	5.91262	5.99284	6.08821	5.49949	5.7334	5.41735	5.13302	5.03375	5.57597	5.90996	5.71419	5.55964	5.32253	5.69833	5.23373	5.48226	5.36269	5.62714	5.72989	5.92762	5.98485	5.61683	5.73942	5.70552	5.38626	5.19909	5.07047
3	euxassay_000054_14.jpg	NM_008190	14915	Guca2a	Guca2	7537				1	5.98845	6.62206	6.55852	6.71013	6.6798	6.69752	6.86502	7.24614	6.95717	7.053	7.25141	6.88061	6.97741	6.98249	7.02422	7.17538	6.86969	6.78762	6.41636	6.03539	6.07659	5.99475	6.42721	6.59645	6.90061	6.76333	7.06861	6.83191	6.92535	7.01533	7.05203	6.84787	6.75475	6.91662	6.52131	6.84117	6.65806	6.67228	6.03832
3	euxassay_002974_11.jpg	NM_008227	15168	Hcn3	BCNG-4|Bcng4|Hac3|Hcn4	7558				1	3.82248	4.03948	4.18465	4.47989	4.5001	4.1949	4.55114	4.08741	4.16631	4.07985	4.19285	4.1411	4.12832	3.82776	4.0646	4.22407	4.2563	4.17521	4.10243	4.15015	3.85608	4.09212	4.30981	4.49774	4.0297	4.24648	4.53048	4.77646	4.15196	4.02806	3.99593	4.14835	4.34731	4.36609	4.36297	4.21719	4.11173	4.1681	4.17876
3	euxassay_012046_11.jpg	NM_145070	29816	Hip1r	AA410023|mKIAA0655	7557				1	5.91874	6.13534	6.935	7.07307	6.5233	6.8383	6.92422	6.77179	7.03691	7.25072	6.97225	6.43898	5.89953	5.81308	6.03587	6.75043	6.0786	6.01372	6.81165	6.42394	5.98957	6.5389	6.37011	6.03575	6.37089	6.46607	7.02883	7.20234	6.74065	7.02268	6.59702	6.40268	6.43194	6.14896	5.73291	6.32083	6.36487	6.11259	6.1964
3	euxassay_015954_14.jpg	NM_015786	50708	Hist1h1c	0610008C09Rik|H1.2|H1c|H1f2|H1var1|His1a|MGC107646	7569				1	5.06104	4.78726	4.50331	4.51176	4.68876	4.79189	4.56555	5.14075	5.73611	5.54471	5.52883	5.34228	4.97429	5.08044	5.56788	5.00357	4.45588	4.24551	4.47331	4.44709	4.75457	4.82959	4.46897	4.56826	4.72437	5.07664	4.7662	4.91602	5.5316	5.63457	5.31354	5.24334	5.06711	5.41922	4.82959	4.69249	4.63816	4.26732	4.38093
3	euxassay_000515_11.jpg	NM_145713	14957	Hist1h1d	H1.3|H1D|H1f3|H1s-4	7569				2	5.8109	5.9086	5.93766	6.23658	6.84359	7.39902	7.42126	7.33334	7.06614	7.28544	6.9819	6.59103	6.26406	6.35597	6.27289	6.16645	6.08732	6.35499	5.96499	6.09144	6.16422	5.67129	5.62007	5.86416	6.05369	6.83604	7.01003	6.83295	7.41508	7.43781	6.99126	6.99729	6.66619	6.32841	6.25054	5.95469	6.41163	6.30872	5.85505
3	euxassay_000515_14.jpg	NM_145713	14957	Hist1h1d	H1.3|H1D|H1f3|H1s-4	7569				2	6.1705	6.25298	6.10646	6.14936	6.76478	7.24925	7.39814	7.28332	7.53148	7.20477	7.33782	6.96079	7.07398	6.45081	6.61135	6.68382	6.07312	5.96949	5.42855	6.01399	6.83766	6.24304	6.07929	6.12332	5.96039	6.6445	7.24564	7.33657	7.41394	7.39079	7.21514	7.54184	7.03129	6.78838	6.43762	6.25058	6.2257	6.27808	6.2151
3	euxassay_003511_11.jpg	NM_008251	15312	Hmgn1	HMG-14|Hmg14|MGC103397	7539				1	6.31166	6.41547	6.7031	7.10025	7.31362	7.27515	7.15038	6.81197	5.90705	6.72473	7.33975	7.02277	6.29223	6.16396	6.56025	6.48709	6.58751	6.02662	6.32018	6.06783	6.17783	6.78847	7.21349	7.19828	7.33826	7.25164	7.35141	7.49765	6.63053	6.56025	6.68857	6.5988	6.67765	6.59748	7.04916	7.25647	6.81837	6.4224	6.31656
3	euxassay_011898_11.jpg	NM_010474	15476	Hs3st1	3-Ost|D5Wsu110e|Hsg3ost	7538				1	5.10776	5.34146	5.41253	6.17067	5.97704	5.86127	6.31571	6.02624	6.56463	6.88613	6.18779	5.65208	5.27401	5.19087	6.02337	5.40273	5.37982	5.08937	4.89566	5.08229	5.14058	5.31351	5.76222	5.22994	6.13592	6.31341	6.42848	6.27342	6.5129	6.44435	5.68776	6.11179	5.61821	6.03033	5.6888	5.43767	5.09251	5.29662	5.05201
3	euxassay_010007_11.jpg	NM_010480	15519	Hsp90aa1	86kDa|89kDa|AL024080|AL024147|Hsp86-1|Hsp89|Hsp90|Hspca|hsp4	7569				1	4.17506	4.47706	5.00978	4.89055	4.352	4.91732	4.39454	4.89684	4.93489	4.63501	4.7937	4.98974	5.09354	4.68469	5.11683	4.9488	4.40215	4.88513	4.60019	4.21342	4.40215	4.7985	5.06429	5.12909	4.54518	4.59024	4.19895	4.50221	4.85129	4.72968	4.87059	5.18744	5.00396	4.88694	4.24335	4.39962	4.40467	4.43512	4.41272
3	euxassay_005176_11.jpg	NM_026347	67732	Iah1	1500019E20Rik|4833421E05Rik	7469				1	3.97589	4.15153	4.14852	4.65523	4.71443	4.68773	4.3493	4.2559	4.79748	4.75556	4.84844	5.01964	4.69497	4.97701	4.35974	4.82507	4.79882	4.40836	4.03478	3.76452	3.892	4.45052	4.56781	4.66158	4.77521	4.54166	4.35844	4.70729	4.71646	4.93832	4.8279	4.82413	4.47475	4.76542	4.33083	4.27231	4.08476	4.09042	4.13672
3	euxassay_014196_14.jpg	AK044711	232227	Iqsec1	AW561907|BC026481|BRAG2|D6Ertd349e|KIAA0763|cI-43|mKIAA0763	7557				1	4.43825	4.39953	4.3493	4.46147	4.64458	4.68149	4.84008	4.83447	4.64031	4.75457	4.57343	4.68253	4.89048	4.64885	4.48314	4.51153	4.41889	4.30511	4.50472	3.86914	4.39319	4.36234	4.2836	4.78784	4.76247	4.98884	5.1075	4.95737	4.5957	4.62089	4.69187	4.76503	4.66621	4.8838	4.62523	4.70606	4.58839	4.49053	4.69001
3	euxassay_011005_11.jpg	NM_001039472	16565	Kif21b	2610511N21Rik|KIAA0449|mKIAA0449	7470				1	6.32576	6.82147	6.80121	6.89712	7.07029	6.83782	7.37051	7.3738	7.46879	7.17937	6.66504	6.2059	6.35239	6.08124	6.40677	5.55071	5.09153	5.06064	4.99932	4.91549	5.58133	5.78809	6.93744	6.81038	7.30105	7.37862	6.94942	7.44507	7.2931	6.70983	6.58482	6.50667	6.4867	6.3121	5.86312	5.33037	4.97786	5.00057	5.148
3	euxassay_016415_14.jpg	NM_177757	269152	Kif26b	4832420M10|BC056349|D230039L06Rik|MGC156028|MGC169313	7538				1	5.15477	4.93658	5.01716	4.82601	4.92343	4.97446	5.80051	5.40163	5.37032	5.2463	5.04414	4.89946	4.67419	5.02457	4.75951	4.65098	4.59238	4.39166	4.73042	4.70606	4.91105	4.96337	4.9146	4.7917	4.99723	5.16374	5.30289	5.51347	5.24489	4.98378	4.88778	4.82978	4.80419	4.77618	4.82507	4.82884	4.84417	4.47042	4.61611
3	euxassay_004876_11.jpg	NM_029436	75785	Klhl24	1110046J11Rik|4930429H24Rik|6530402O20Rik|C85082	7469				1	6.64884	6.69709	6.57918	6.35526	6.76182	6.70874	6.72051	6.78879	6.75272	6.9483	6.74488	6.3581	6.46419	6.75555	6.48342	6.46085	6.26806	6.87531	6.53013	6.44285	6.58944	6.90169	6.61676	6.46094	6.57894	6.58133	6.53442	6.7474	7.03391	7.00229	7.00068	6.55137	6.72701	6.52699	6.7708	6.71136	6.38296	6.62386	6.49384
3	euxassay_000079_14.jpg	NM_020028	53978	Lpar2	Edg4|IPA2|LPA2	7538|7539|7540				1	6.2033	7.027	7.19023	7.18869	6.77312	7.02035	6.62995	7.02282	7.09283	7.02577	7.01936	7.0324	7.11659	7.19658	7.17832	7.1008	7.15467	7.08033	6.66576	6.40649	6.58212	6.94182	7.04557	7.14473	6.95673	7.02454	6.92938	6.89288	7.02084	7.1001	7.00745	7.13564	6.98232	7.03044	7.27898	6.98687	6.91031	6.9151	6.60941
3	euxassay_013747_11.jpg	NM_015763	14245	Lpin1	4631420P06|Kiaa0188|Lipin1|fld|mKIAA0188	7469				1	4.48514	4.75108	4.8242	4.79678	5.18392	5.43207	5.39293	5.41789	5.0028	5.0816	5.31534	4.96942	4.68842	4.62162	4.68063	4.64744	4.72677	4.85138	4.77147	4.47616	4.7319	4.98974	4.99277	5.07115	5.34876	5.55718	5.2877	5.2136	5.1473	5.20059	5.18921	5.17063	5.27637	4.94282	4.97885	4.82618	4.90186	4.92842	4.72374
3	euxassay_013951_11.jpg	XM_982423	210297	Lrch2	AI316885|mKIAA1495	7469				1	4.79555	5.1359	5.40856	5.72322	5.62432	5.47073	6.00028	5.37998	5.8766	5.44213	5.42855	5.59367	5.15627	5.11831	5.02293	5.61454	4.92607	4.67209	4.81182	4.50754	5.00307	5.44582	5.26865	6.15489	5.91607	5.5029	5.44643	5.69564	5.71815	5.51171	5.39593	5.68945	5.66543	5.35278	5.17117	5.02375	4.53822	4.14852	4.15603
3	euxassay_008003_11.jpg	NM_001024645	268747	Lrrc16b	mFLJ00240	7557				1	4.11738	4.26404	4.47026	4.01911	4.50496	5.17908	4.61839	4.80935	5.36281	5.08439	5.747	5.29269	5.154	4.06316	4.3957	3.86654	4.6773	3.86288	3.82944	3.56628	3.87515	4.33383	4.48873	4.17683	5.37776	4.68311	5.13218	4.67417	4.69199	4.9996	5.21836	5.45966	4.84165	3.84997	3.87827	4.21679	4.27709	3.74628	3.4415
3	euxassay_005123_14.jpg	NM_023788	75625	Mageh1	2010107K23Rik|APR-1|APR1	7469				1	4.16329	4.72731	4.97967	5.23022	5.00699	5.15766	5.17487	5.48153	5.36079	5.5319	5.49226	5.36579	5.28587	5.19502	5.00057	4.88145	4.71748	4.53015	4.48075	3.87389	4.65735	4.43296	4.70378	5.04147	5.22411	5.32524	5.23874	5.52396	5.45254	5.7248	5.91632	5.82192	5.63596	5.45776	5.1734	4.72255	4.78396	4.7185	4.31481
3	euxassay_013774_11.jpg	NM_172833	240354	Malt1	A630046N12|D430033E09Rik|MGC124469|MGC124470	7469				1	6.86113	7.08936	7.26465	6.86778	6.91583	6.8642	7.10493	7.25625	6.91051	7.09793	7.00039	7.2381	7.17494	7.23895	7.24594	7.17472	6.82854	7.0188	6.72385	6.72658	7.1463	7.47868	7.15269	7.08925	6.93273	7.04962	6.96156	6.96772	6.88416	7.2398	7.05903	7.16738	7.01608	7.13535	6.6873	6.74313	6.72658	6.79342	6.70431
3	euxassay_001250_11.jpg	NM_027115	69546	Mapk1ip1	2310009E07Rik|AU043776|MISS	7539				1	6.17181	6.79396	6.68549	6.17514	6.31224	6.48682	6.11165	6.23134	5.94819	6.51573	6.71096	5.89576	6.59911	6.13693	6.40261	6.50852	6.36071	6.23907	5.6439	5.68062	6.17736	6.64948	6.4981	6.27547	6.41913	6.2037	6.39394	6.24831	6.18876	6.47456	6.66956	6.29329	5.898	6.17957	6.39964	6.5233	6.24338	5.89513	5.34977
3	euxassay_000081_14.jpg	NM_207515	105559	Mbnl2	1110002M11Rik|AI047808|AI837313|AI849185|AL118326|KIAA4072|MBLL|R75232|mKIAA4072	7470|7537				1	6.23765	6.8067	6.84959	6.71386	6.61331	6.62375	6.82612	6.81121	6.91082	7.17847	7.09357	7.13579	7.14601	6.8475	6.77324	6.97944	6.6868	6.74513	6.60601	6.47248	6.6218	6.94531	7.00917	6.82124	6.75718	6.94797	6.99303	6.83597	6.87405	6.7947	6.79362	6.90782	6.91149	6.79072	6.71034	6.78383	7.03672	6.85825	6.74026
3	euxassay_003411_14.jpg	NM_027213	69792	Med6	1500012F11Rik|AU019660|AV213303	7569				1	4.70531	4.83292	4.95975	5.28875	5.33317	5.20359	5.35095	5.27432	5.6608	5.46784	5.75137	5.83424	5.51826	5.55566	5.33449	5.25836	4.94459	4.63839	4.57254	4.34036	4.83292	5.14977	5.08175	4.99249	4.92173	4.89041	5.13225	5.55534	5.6945	5.84232	5.74888	5.65338	5.38779	5.66185	5.2216	5.16315	4.82903	4.7919	4.81676
3	euxassay_013975_14.jpg	D10049	17276	Mela	80kDa|Ag|MGC130515|env|gag|gag-pol|pol	7569				1	4.81636	4.39925	5.21195	5.30274	5.67998	5.43584	5.18723	5.6669	5.81993	5.75066	5.84292	5.51041	5.67005	5.3824	5.50395	5.38777	5.07425	4.99805	5.01699	4.41361	4.59436	4.30644	5.4826	5.31353	5.15984	5.39959	5.47361	5.64624	6.26764	6.09078	5.75433	5.7382	5.81082	5.77731	5.80222	5.4718	5.30747	5.10252	4.38474
3	euxassay_008130_11.jpg	NM_029931	70122	Mllt3	2210011H10Rik|2610012I03Rik|3830408D16Rik|Af9|D4Ertd321e	7469				1	5.41556	5.94071	6.25524	6.60948	7.19564	6.6509	6.96246	6.63066	6.83402	6.92178	6.15921	6.33352	6.08606	5.91809	5.83796	6.07849	6.12287	6.61603	5.72855	5.57829	5.05234	5.93373	6.21911	6.58964	6.63389	6.8088	6.93652	6.57761	6.51097	6.90342	6.4797	6.27759	6.03662	6.08936	6.20426	6.22669	5.82671	5.96092	5.80623
3	euxassay_000007_11.jpg	NM_011846	23948	Mmp17	MT4-MMP|MT4MMP|MTMMP4	7538				1	5.45058	5.49676	5.38918	6.05403	5.30815	5.33541	5.53252	5.62247	5.38995	5.74589	5.70407	5.59222	5.37766	5.64186	5.53736	5.23853	5.48105	5.12735	5.08264	4.80494	5.05043	5.3996	5.42991	5.73269	5.61333	5.39071	5.40364	5.37612	5.88313	5.7387	5.70038	5.60479	5.62312	5.56607	5.57686	5.33063	5.43807	5.43585	4.91211
3	euxassay_012184_11.jpg	NM_010820	17475	Mpdz	AI225843|B930003D11Rik|MUPP1	7558|7569				1	5.26536	5.5212	5.23446	5.29424	5.0976	5.05965	5.78085	5.79342	6.14482	5.92808	6.06607	6.14972	6.12352	5.91353	6.45089	5.73994	5.24493	5.11959	4.82833	4.66984	5.16542	5.44475	5.09525	4.95759	5.2373	5.79342	6.25702	6.14822	6.01037	5.65977	5.89479	5.92369	5.96533	5.41312	5.60428	5.64222	5.44143	5.23815	5.34139
3	euxassay_014223_11.jpg	AK164559	77015	Mpped2	239Fb|2700082O15Rik|AV354767|AW060960	7569				1	4.812	4.68564	4.28961	4.32363	5.04056	4.49834	5.59698	5.61082	5.91119	6.27842	6.3373	5.90746	5.86546	5.94242	4.93579	4.69558	5.13483	5.19405	4.81286	4.5696	4.1467	4.14126	4.4286	4.87781	4.03575	4.83015	5.48332	5.94489	6.14525	5.5103	5.23186	5.37393	4.81713	5.06711	4.87836	4.50577	4.39394	4.9809	4.75911
3	euxassay_005418_11.jpg	NM_008665	17932	Myt1	KIAA0835|Nzf2|Nzf2a|Nzf2b|Nztf2	7469				1	4.06638	4.89228	5.56461	4.67314	5.28381	5.79041	6.25784	5.85109	5.78635	4.96714	5.47578	4.95375	4.8729	4.56284	4.9885	4.37785	4.7826	5.0498	4.5396	3.70184	4.5313	4.57455	4.87691	4.90215	5.09349	5.06823	6.0529	5.45108	4.49195	4.8464	4.91177	4.34036	3.92298	4.29208	4.633	4.49764	4.2061	4.19214	3.9502
3	euxassay_001103_11.jpg	NM_026495	67991	Nacc2	0610020I02Rik|AI448087|Btbd14a|C030048H19Rik	7539				1	4.76082	4.94382	5.48615	5.85798	5.88753	6.34656	6.57558	6.51447	6.12286	5.87829	5.62189	5.68058	6.1164	5.70537	5.55391	5.94798	6.06884	5.61357	5.24856	5.19487	4.77728	5.50745	5.97116	5.69674	5.99247	6.59428	6.49257	6.06609	6.36107	6.01644	5.60816	5.48829	5.32353	5.3503	5.36885	5.55254	5.39289	5.43704	5.33549
3	euxassay_003015_11.jpg	NM_026495	67991	Nacc2	0610020I02Rik|AI448087|Btbd14a|C030048H19Rik	7539				1	5.21858	5.17842	5.67905	6.12128	6.29873	6.39444	6.16214	6.21057	6.02314	5.96531	5.80711	5.82588	5.73068	5.80653	5.67843	5.77116	5.72645	5.64806	5.57058	5.66885	5.23144	5.81006	5.71245	6.16884	6.11574	6.29301	6.4402	6.23673	6.25825	5.75404	5.8704	5.5699	5.77116	5.71001	5.67968	5.5726	5.5726	5.20126	5.21858
3	euxassay_009378_14.jpg	NM_016965	50884	Nckap1	C79304|H19|Hem-2|Hem2|Nap1|mKIAA0587|mh19	7469				1	3.97993	4.88975	5.01004	5.58967	4.84917	4.21732	4.40909	4.80283	5.10904	4.74423	4.92395	5.12842	4.90695	4.58937	4.775	4.68127	4.81541	4.86438	4.27228	4.46242	4.33954	5.0298	5.04639	4.68563	4.49549	4.40305	5.09972	5.24544	4.82901	5.30909	4.96147	5.3572	4.86163	4.81541	4.58436	4.78375	4.77938	4.63524	4.26813
3	euxassay_019467_14.jpg	XM_130329	18012	Neurod1	BETA2|BHF-1|Neurod|bHLHa3	7538		mouseTF		2	5.0289	5.42001	5.43058	6.16135	5.97046	6.55543	7.18854	7.15143	7.31187	7.20094	6.84942	6.28093	6.74669	5.75586	5.40622	5.29833	5.74045	5.44966	5.17877	4.98401	4.84406	5.34048	5.63955	6.07957	6.08312	6.62935	6.74818	7.30513	6.82795	6.99183	7.03239	5.81685	5.52702	5.84547	5.35818	5.2479	5.29125	5.26148	5.12574
3	euxassay_013855_11.jpg	NM_010895	18013	Neurod2	Ndrf|bHLHa1	7538		mouseTF		1	5.23197	6.19583	6.41478	6.59389	7.01261	7.29499	7.0154	7.09524	7.18335	6.26702	6.22998	5.88567	5.72567	5.94931	6.02476	6.50194	5.76789	5.48869	5.83642	5.8464	5.37693	5.46303	6.5473	6.6954	7.11749	7.06488	7.22278	6.65382	6.96833	6.99936	6.4712	5.81543	5.82798	5.99491	6.10713	5.94634	6.07114	5.4562	5.32638
3	euxassay_003709_14.jpg	NM_010916	18071	Nhlh1	Hen1|Nscl|Tal2|bHLHa35	7539		mouseTF		1	3.63891	5.36802	4.93771	5.18058	5.04773	6.00172	5.97685	6.51703	6.68957	6.06054	6.56909	6.11178	6.3561	5.03171	5.60383	5.24359	4.57039	4.4193	4.61297	4.47442	5.58916	4.47785	4.16586	5.24721	5.51147	6.49739	6.71224	6.37636	6.21464	5.69063	5.78336	5.38839	5.30202	5.1493	5.72105	4.67703	5.41967	4.95282	4.50298
3	euxassay_001085_11.jpg	NM_134122	106582	Nrm	2610307M02Rik|AI429796	7569				1	5.97538	6.16762	5.91745	5.57911	5.77821	6.0651	6.77125	7.06639	6.92756	6.84282	6.57981	6.229	6.15745	6.33539	6.61567	6.56182	6.19586	5.96857	5.83734	5.69865	5.90374	5.78001	5.83079	5.98734	6.27354	6.70083	6.49408	6.67935	6.82926	6.86201	6.76635	6.73509	6.53844	6.28078	6.20204	6.14768	6.23007	6.10096	5.7482
3	euxassay_003207_11.jpg	NM_153529	68404	Nrn1	0710008J23Rik|MGC40786|Nrn|cpg15	7557|7558				1	6.71874	6.79838	6.72784	6.6231	6.92223	7.35182	7.27958	7.54049	7.39532	7.43921	7.29905	7.09164	6.81527	6.48318	6.86865	6.95549	7.10299	6.85279	6.5516	6.49274	6.60082	6.46733	6.79347	7.17365	6.92144	6.94583	7.19678	7.47569	7.42192	7.4148	7.28247	7.25335	7.16719	7.18867	6.7871	6.48067	6.99492	6.82605	6.52312
3	euxassay_009884_11.jpg	NM_027289	70021	Nt5dc2	2510015F01Rik	7569				1	4.42214	4.44439	4.45418	4.83727	4.99973	5.1682	5.4073	5.28587	6.29349	5.7933	5.74091	5.29243	5.97655	5.43041	5.59067	5.95914	4.99656	5.594	5.00357	4.52296	4.69393	4.42089	4.63171	5.36514	5.83368	5.74878	5.42892	5.3851	5.20126	5.79156	5.16329	5.15522	5.71612	5.6853	5.53091	5.18284	4.89031	4.97938	4.69867
3	euxassay_007685_11.jpg	NM_013626	18484	Pam	PHM	7557				1	4.17355	4.34575	5.24187	5.06368	5.17562	6.10619	5.7667	6.36923	5.504	5.29941	4.89845	4.75741	4.53049	5.05544	4.4903	4.56185	4.45105	4.23822	4.23701	4.57055	4.73866	4.56476	4.85084	5.83569	5.68315	6.37338	5.83047	6.2801	5.23581	4.8799	4.96007	5.40965	4.67285	4.73465	4.76739	4.65205	4.41089	4.24749	4.03414
3	euxassay_012748_14.jpg	NM_178685	219257	Pcdh20	C630015B17Rik|Pcdh13	7557				1	4.97276	5.30357	4.48314	5.05543	4.83727	4.78977	4.83914	4.88054	4.78105	5.02244	4.64843	5.01947	4.72679	4.69744	5.19427	4.68129	4.40534	4.89031	4.34036	4.39928	4.23477	4.8354	4.70011	5.24418	5.8834	5.5361	5.16001	5.23428	5.02867	5.07949	4.79189	4.72316	5.07284	4.95168	4.62523	5.1058	5.00457	4.90322	4.85971
3	euxassay_009713_14.jpg	NM_018764	54216	Pcdh7	-	7557				1	4.69879	4.64581	4.83313	4.39265	4.52965	4.66218	4.80569	5.27871	5.43818	5.34594	5.589	5.10872	5.1567	5.04864	5.08373	4.94664	4.94664	4.72111	4.92482	4.43031	4.93446	4.99687	4.78258	4.60405	4.8499	5.04864	4.93621	5.19148	5.22258	5.11182	5.45106	5.11799	4.93795	4.85268	4.84526	4.94317	4.9758	4.74621	4.5285
3	euxassay_006129_14.jpg	NM_008791	18546	Pcp4	P16Rimb19|Pcp-4|Pep19	7538|7557				1	4.02384	4.30673	4.48706	5.13209	4.60231	5.73981	6.11728	5.6628	5.82192	5.19762	4.3727	4.11807	4.04712	4.04064	3.99277	3.98773	3.90811	3.69773	3.65171	3.71817	3.59598	3.93081	4.32855	4.56103	4.68876	5.5228	6.13564	5.67383	5.61399	4.98715	4.55536	3.96908	3.89739	4.0455	4.05034	4.00281	4.03576	3.79717	3.76216
3	euxassay_000058_14.jpg	NM_172705	230936	Phf13	BC029632|Phf5	7540				2	5.42936	5.77042	5.78253	5.33039	5.30184	5.19503	5.27034	5.34191	5.63266	5.59888	5.55807	5.69999	5.65245	5.64446	5.76481	5.66356	5.55807	5.36154	5.05819	4.84607	5.33323	5.55936	5.45464	5.37687	5.27823	5.12982	5.41198	5.74153	5.44915	5.56711	5.69793	5.58837	5.34389	5.4716	5.39176	5.33597	5.3059	4.90344	5.19211
3	euxassay_011481_11.jpg	NM_029404	75725	Phf14	1110001C23Rik|4932409F11Rik|5730446A07Rik|AA623952|AV297001|KIAA0783|mKIAA0783	7470				1	6.75238	6.13275	6.31372	6.35817	5.91625	6.50022	6.43651	6.41975	6.3768	6.16348	6.19796	6.00728	5.93209	5.70633	6.1764	6.19139	6.31533	6.33452	5.66412	5.86312	6.71014	6.22049	6.54417	6.09197	6.07637	6.65012	6.39558	6.5255	6.16527	6.09994	6.04273	5.93471	6.01176	6.49027	6.19752	6.08679	5.68296	5.81908	5.04495
3	euxassay_013151_11.jpg	AK140530	227120	Plcl1	C230017K02Rik|KIAA1092|PLC-L|PLC-L1|PLCE|PLCL|PLDL1|PRIP|PRIP-1	7557				1	3.59962	3.51626	3.60292	3.40879	3.66313	4.00156	3.85418	3.97414	3.86992	3.65407	3.55818	3.47	3.44077	3.21771	3.33355	3.46378	3.65407	3.365	3.66314	3.66313	3.50924	3.44077	3.64517	3.84305	3.95802	3.56593	4.30592	4.32432	3.91465	3.55038	3.78277	3.44077	3.38925	3.16251	3.33808	3.14709	3.2324	3.14708	3.26135
3	euxassay_013723_11.jpg	NM_001033298	228730	Plk1s1	Gm114|Ncrna00153	7557				1	4.82991	4.97531	4.90597	5.07447	5.17804	5.10939	5.26637	5.1812	5.2888	5.29523	5.24961	5.25082	5.12653	5.29882	5.24065	5.0352	4.93133	5.00224	4.32817	4.25869	3.56536	4.30093	4.83954	5.28352	5.12128	4.97677	4.99484	5.26339	4.94069	5.36524	5.18561	5.22472	5.19252	5.13372	5.18876	5.07617	4.88778	4.89678	4.85492
3	euxassay_009720_14.jpg	NM_175750	243743	Plxna4	9330117B14|KIAA1550|Plxa4|mKIAA1550	7538				1	3.76309	3.87969	3.94805	4.09733	4.37184	4.93961	5.25595	4.66057	4.34954	4.06759	3.86248	3.76309	3.83866	3.49916	3.40286	3.40286	3.40286	3.44131	3.82095	3.46639	4.02057	4.12532	4.08338	4.04748	4.30636	5.04047	4.70953	4.64143	4.82955	4.17291	4.02462	3.99189	3.77819	3.48492	3.86719	3.42648	3.40286	3.40286	3.40286
3	euxassay_012784_14.jpg	NM_011130	18970	Polb	A430088C08Rik	7469				1	4.1603	4.908	5.27092	5.99586	6.08278	5.54781	5.63103	6.28098	6.49633	5.96669	5.63157	5.4788	6.22921	6.02979	5.65084	5.28479	5.14531	4.39627	4.77465	5.0844	4.81344	5.61773	5.15883	5.42011	5.57385	6.18547	5.87224	6.18803	6.19716	5.41511	6.10663	5.09695	5.98578	5.60931	5.1833	5.21458	5.14228	5.25572	4.19801
3	euxassay_000324_11.jpg	NM_133931	101185	Pot1a	1500031H18Rik|AI851169|Pot1	7569				1	5.74305	5.70975	5.56353	5.79767	5.54785	6.00457	6.21081	5.80342	5.89031	6.23974	5.92119	6.14947	6.0789	5.87619	5.62247	5.96868	5.82196	5.36682	5.49587	5.48875	5.61349	5.65353	5.52714	5.37012	5.66306	5.94389	5.92291	6.06472	6.23655	6.49546	5.81714	6.13209	5.81486	5.57618	5.5745	5.7715	5.52836	5.8113	5.79479
3	euxassay_005130_11.jpg	NM_026845	68816	Ppil1	1110060O10Rik|AI327391|Cypl1	7469|7569				2	4.79788	5.05215	5.05275	5.28889	4.9835	5.49887	5.79398	5.90749	6.09914	6.05402	6.08209	5.80478	5.51167	5.44101	5.25264	5.67325	5.21244	4.96144	5.22902	4.58097	4.68557	4.44092	4.99045	5.04427	5.03697	5.20283	5.92738	6.50577	5.90749	6.20343	6.02292	6.31009	5.80851	5.58201	5.50746	5.22229	5.54424	4.74964	4.55588
3	euxassay_012306_14.jpg	NM_001034085	73699	Ppp2r1b	2410091N08Rik|AI790395	7538				1	4.03081	4.16346	4.46023	4.72049	5.32437	5.10748	5.27209	4.74959	4.70521	4.96933	4.55987	4.54507	4.55419	4.86134	4.53058	5.08184	4.322	4.7478	4.47255	4.34427	4.17386	4.49025	4.30263	4.96249	5.8843	5.37803	4.87506	4.85582	5.00221	4.42956	4.25585	4.77381	4.47832	4.88649	4.76086	4.61542	4.57564	4.35684	4.68935
3	euxassay_007998_11.jpg	XM_485102	277360	Prex1	G630042G04|P-REX1|Setd6	7558				1	3.50421	3.70193	3.71942	3.68601	4.53925	4.49627	4.80067	4.12668	5.01189	4.09888	3.81932	3.8913	3.64021	3.56771	3.83063	3.75942	4.25536	3.35963	3.28758	3.32272	3.7367	3.48593	3.56352	3.85378	4.32404	4.39324	4.95703	4.35272	4.21995	3.94607	4.25815	3.67409	3.98876	3.68659	3.73154	4.12055	3.46983	3.43072	3.50084
3	euxassay_000097_11.jpg	NM_011185	19170	Psmb1	AA409053|C81484|Lmpc5	7537				1	5.28993	5.97185	6.46698	6.3712	6.51259	6.5181	6.18985	6.52905	6.55826	6.49264	6.17027	6.31104	6.33023	6.14493	6.3379	6.24735	6.28278	5.64847	5.79713	5.45165	5.55877	6.09652	6.6157	6.32163	6.06454	6.14941	6.1198	6.30062	6.291	6.24494	6.33308	6.50353	6.48243	6.35842	6.14849	5.98998	6.33449	6.39398	5.76759
3	euxassay_009725_11.jpg	NM_019933	19258	Ptpn4	PTPMEG|Ptn4|TEP|TEP/mPTPMEG|hPTP-MEG	7538|7539				1	4.07433	4.17981	4.61981	5.15176	5.70643	5.99569	5.27418	4.52435	4.38681	4.63494	4.65353	4.60429	4.59105	4.78726	4.91177	4.50331	4.48624	4.80227	4.44562	4.62912	4.2559	4.46026	4.61654	5.99611	4.988	5.17117	5.09739	4.84566	5.12139	5.02867	4.27727	4.52017	4.41439	4.53407	4.48481	4.74484	4.46897	4.73645	4.23873
3	euxassay_012280_14.jpg	NM_011232	19355	Rad1	-	7569				1	4.0432	4.11711	4.50234	4.1554	4.32335	4.49951	4.59678	4.73201	4.73683	4.79688	4.85342	5.01781	5.27706	4.96849	4.61652	4.61913	4.56666	4.10878	4.14547	4.09946	4.04125	4.30724	4.60997	4.52619	4.4313	4.67793	4.74163	4.95821	5.06071	5.43954	4.76422	4.79457	4.86667	4.43872	4.32655	4.27614	4.42087	4.25657	4.22691
3	euxassay_000486_11.jpg	NM_145839	320292	Rasgef1b	4732452O09Rik|GPIgamma4|Gpig4	7538				1	5.27934	5.29099	5.33269	5.75744	6.19537	6.50284	6.7097	7.0521	6.68187	5.73052	5.68503	6.00939	5.74405	5.94372	5.7278	5.74644	5.9848	5.72901	5.57411	5.47018	5.31736	5.18335	5.39051	5.38669	6.26302	6.64176	6.60408	6.76994	6.64123	6.31227	6.09067	5.83905	5.72093	5.79209	5.7189	5.45467	5.4291	5.24269	5.29099
3	euxassay_000288_14.jpg	NM_009031	245688	Rbbp7	AA409861|AI173248|AU019541|BB114024|mRbAp46	7569				1	5.04136	4.86763	5.14296	5.14693	5.34873	6.25634	6.27768	6.50559	6.65847	6.40835	6.21475	6.8	6.18955	5.64346	5.95018	6.17378	5.60962	4.63755	5.12084	4.90775	5.10795	5.23522	5.07504	5.03753	5.42687	6.66976	6.73075	6.53525	6.5303	6.70837	6.56651	5.96492	5.8966	6.14138	5.50459	6.35675	6.10658	5.57112	5.26419
3	euxassay_009808_14.jpg	NM_054048	104383	Rcor2	1A13|AW122124|CoREST|Rcor|Rcor1	7557				1	5.92179	6.01748	6.2821	6.64789	6.24004	6.61577	6.65507	6.69835	6.40566	6.90341	6.74617	6.42164	5.51007	6.0408	6.14867	6.12933	6.5164	6.10596	6.21221	6.26631	5.97401	5.73478	5.8142	6.48117	6.8257	6.75362	6.89131	6.54286	7.0097	6.70317	6.23367	6.81506	5.84032	5.69665	5.89958	6.10829	6.04566	6.38062	6.68108
3	euxassay_012260_14.jpg	NM_020002	56739	Rec8	Rec8L1|mrec	7538				1	4.95047	5.10595	4.86962	5.16523	5.52396	5.27349	6.6901	5.87587	5.34149	5.46421	5.50996	5.33594	5.1058	5.10114	4.86962	4.98243	4.93186	4.73765	4.60165	4.3639	4.48791	4.81562	5.65008	5.36579	5.61312	5.9263	5.31274	5.45181	5.44447	4.79536	5.16687	5.22802	4.78958	5.15971	4.86192	4.85861	5.00357	4.72437	4.60824
3	euxassay_008413_11.jpg	NM_019706	56515	Rnf138	2410015A17Rik|2810480D20Rik|STRIN|Trif|Trif-d	7469				1	5.96751	6.51548	6.1814	6.05835	5.71631	6.00942	5.77603	5.94687	6.06699	6.15364	6.45117	6.20669	5.83703	5.96251	6.29304	6.32288	5.98546	5.74513	5.69031	5.45661	5.99089	5.98077	5.92909	6.15105	5.91269	6.42547	6.15824	5.77895	5.6886	5.91056	5.98331	6.12923	6.49323	6.08268	5.8557	5.47384	5.73448	5.59751	5.25414
3	euxassay_011504_14.jpg	NM_016759	51799	Rundc3a	RPIP-8|Rap2ip|Rpip8	7469				1	5.48959	5.75002	6.05556	6.18953	6.43113	6.40062	6.05194	6.15732	6.26024	6.06875	6.08773	5.92115	5.8583	5.93563	5.72675	6.0753	5.9092	5.73279	5.54012	5.47554	5.46621	5.59283	5.8205	6.35533	6.2296	5.98518	6.19665	6.32815	5.99715	6.24711	6.30958	6.06636	6.13012	5.71001	5.80768	5.76925	5.61835	5.55498	5.49581
3	euxassay_018949_14.jpg	NM_139146	212712	Satb2	mKIAA1034	7538				1	5.19004	5.56131	5.84622	6.06073	5.7831	5.97285	5.69198	5.99061	5.7606	6.00856	5.67168	5.63559	5.57243	5.47187	5.70535	5.54064	5.44636	5.40849	4.98875	5.3356	4.78289	5.37477	5.54865	5.87701	6.23222	5.85456	5.56341	6.16642	6.02055	5.58639	5.34286	5.5713	5.6564	5.2427	5.5515	5.51924	5.49338	5.14641	5.17183
3	euxassay_016519_14.jpg	XM_619828	545474	Scrt2	AW060659	7538				2	4.41237	3.8131	5.06679	5.07428	5.04475	5.24341	5.7112	6.01761	6.2553	4.82404	4.27639	4.57765	4.63791	4.54826	4.54712	4.27777	4.45389	4.57204	4.28738	3.75577	4.2819	4.20079	4.73569	4.90881	5.02941	6.30914	6.28761	5.93506	5.44401	4.20452	4.301	4.43549	4.30776	4.45633	4.41058	4.47927	4.12078	3.75972	3.82338
3	euxassay_010735_14.jpg	NM_172537	214968	Sema6d	1110067B02Rik|AA409156|D330011G23|Sema6D-1|Sema6D-2|Sema6D-4|Sema6D-5|Sema6D-6|mKIAA1479	7538|7557|7569				1	4.11831	4.23235	4.1399	4.54315	5.07719	6.23946	6.03993	6.70991	6.66743	6.32226	4.6818	3.8561	3.95071	3.82061	3.56022	3.67761	3.51653	3.59601	3.67761	3.66713	4.81074	4.15605	4.30829	4.60594	5.9244	6.11849	6.78305	6.27158	5.84136	4.34443	4.06046	3.48823	3.53509	4.07163	3.9175	4.1876	3.66714	3.67761	3.56022
3	euxassay_011506_11.jpg	NM_172588	218442	Serinc5	A130038L21Rik|AIGP3|C86123|TPO1	7538				1	5.39846	5.58701	5.72524	6.03767	6.08744	6.24922	6.49628	6.5618	6.55798	6.01089	6.15387	6.05228	6.20567	6.0978	5.96296	5.98192	5.57913	5.51297	5.23144	4.96948	4.7384	5.61753	5.68452	6.03309	6.00965	6.13412	6.77879	6.87086	6.50226	6.27843	5.98265	5.92275	5.93553	6.09746	5.69726	5.76789	5.62347	5.25382	5.07175
3	euxassay_001116_11.jpg	NM_001013829	435684	Shf	-	7537				1	4.36403	4.5916	4.74892	4.72951	4.7968	5.49812	5.68732	5.77307	5.38529	4.93945	4.67408	4.70759	4.67533	4.51912	4.38745	4.35805	4.28592	4.28098	4.07575	4.11143	4.41876	4.61578	4.82648	4.84445	5.32258	5.66285	5.22567	5.5531	6.2033	5.82093	4.99077	4.92158	5.19973	4.69775	4.33281	4.24593	4.22893	4.08523	4.14262
3	euxassay_003020_14.jpg	NM_001013829	435684	Shf	-	7539				1	5.1412	5.14649	5.40289	5.30221	6.38903	6.35777	5.8605	5.12797	5.23229	5.7451	5.40793	5.63715	5.55429	4.58037	4.56149	4.66748	4.62002	4.58839	4.63687	4.38246	4.97021	4.97955	5.31166	5.42607	5.62378	5.90005	6.32382	5.82003	5.23641	5.00557	4.90215	4.95994	4.94441	4.54922	4.67878	4.70852	4.61741	4.41289	4.16737
3	euxassay_006320_14.jpg	XM_895104	244668	Sipa1l2	BC058408|mKIAA1389	7557				1	4.39439	4.86637	4.98753	5.28241	5.35764	5.27104	5.14419	5.26792	5.08403	5.52799	5.04935	5.26584	5.0997	4.97782	4.79358	5.01134	4.76045	4.7366	4.83723	4.53701	4.68227	4.97739	4.92691	5.27518	5.14533	5.17225	5.38667	5.08284	5.11558	5.24907	5.37029	5.22677	5.02248	4.87868	4.83582	4.80748	4.72805	4.85534	4.81889
3	euxassay_018972_14.jpg	AF366052	27411	Slc14a2	MGC183591|UT-A1|UT-A3	7557				1	5.03107	5.319	5.32567	4.9172	5.06658	5.01562	5.09843	5.21436	5.25775	5.28184	5.24174	5.15441	5.14538	5.00966	5.20396	5.12715	5.29334	5.0796	4.70127	5.00767	5.08433	5.36042	4.88284	5.13082	5.15621	5.14267	5.05858	5.19261	5.11518	5.11425	5.16786	5.149	5.20831	4.94764	4.91188	5.11147	5.18514	5.02328	4.84652
3	euxassay_004371_14.jpg	NM_080853	140919	Slc17a6	2900073D12Rik|DNPI|VGLUT2	7557				1	5.26295	5.15438	5.37845	5.26452	6.12951	6.83243	7.37362	6.92353	7.16014	7.17035	7.05213	6.83544	6.82679	5.6262	5.30794	5.09933	4.79725	4.66539	4.50521	4.24272	4.50572	5.26086	4.65951	5.14842	5.95186	6.94376	7.09413	7.25764	7.32217	7.24758	6.01802	6.00703	6.43679	6.6647	5.38559	5.02953	4.72549	4.66629	4.52026
3	euxassay_009182_11.jpg	NM_015747	20515	Slc20a1	AI607883|Glvr-1|Glvr1	7469|7539				1	5.46008	5.91336	5.8926	5.77238	5.1829	5.38726	5.55264	5.66353	6.06292	6.05812	6.13464	5.74897	5.67978	5.44237	5.6005	5.1979	4.8562	5.18914	4.9577	4.88903	5.67456	5.44083	4.88632	5.33063	5.33063	5.36993	5.532	5.85432	6.0695	5.90335	6.02957	5.78624	5.98661	5.53517	5.5569	5.33129	5.17146	5.15205	4.58504
3	euxassay_019725_11.jpg	NM_001081263	242259	Slc44a5	AA117069|Gm422	7538				1	4.37535	5.0947	4.38003	4.19362	4.57805	4.91737	5.1666	5.24115	4.76484	4.70902	5.00627	4.68697	4.7496	4.63722	4.37782	4.26444	4.05859	4.27038	4.43611	4.51435	4.72989	5.13697	4.97384	4.67447	4.88286	4.62335	5.20684	5.18874	4.78325	4.51535	4.79815	4.6843	4.81939	4.45607	4.68207	4.19965	4.18944	4.01038	4.0004
3	euxassay_012152_11.jpg	NM_012030	26941	Slc9a3r1	EBP-50|MGC95776|NHE-RF|NHERF-1|NHERF1	7569				1	4.80514	4.37913	4.22194	4.26704	4.30132	4.29725	4.32551	4.33215	4.54967	4.47114	4.30673	4.71341	4.51737	4.96097	4.24889	4.52157	4.42189	4.4338	4.26732	4.37939	4.58015	4.61872	4.47595	4.53592	4.40079	4.43825	4.73263	4.58126	4.64565	5.47374	4.76444	5.22788	4.74962	4.67878	4.06766	4.08287	4.54373	4.49906	4.49052
3	euxassay_019506_11.jpg	NM_011417	20586	Smarca4	Brg1|HP1-BP72|SNF2beta|SW1/SNF	7536		mouseTF		1	6.74238	7.21893	7.45819	7.45819	7.31474	7.27119	7.43225	7.15182	6.93865	7.02759	7.16863	7.33712	7.34581	7.3685	7.15633	6.86493	6.8259	7.12451	6.48478	6.69401	6.70757	7.04444	7.05413	7.3613	7.39826	6.82646	7.27947	7.1693	7.17752	6.91015	7.35211	7.29098	7.38221	7.30199	7.14572	6.81427	7.19294	6.71278	6.93577
3	euxassay_009132_11.jpg	NM_029949	77634	Snapc3	1810020H02Rik|4930558A07Rik|5031401C21Rik|AI414457|E030018J20Rik	7469				1	5.92696	6.59323	6.06744	7.0853	6.64444	6.76842	6.72059	6.69606	6.78596	6.37584	6.862	6.46246	6.38354	6.15068	6.45014	6.26765	6.39406	6.35543	5.91863	6.30005	7.14677	6.31503	6.2313	6.85211	6.62346	6.84767	7.01193	6.92067	7.17544	6.40166	6.10367	6.07304	6.33373	6.69374	6.59977	5.84385	5.85567	5.95397	5.84385
3	euxassay_012430_11.jpg	XM_919751	234214	Sorbs2	2010203O03Rik|9430041O17Rik|A530071H08|Argbp2|mKIAA0777	7538				1	4.8146	5.35665	5.4776	5.97319	5.81668	6.1187	6.42932	6.35416	5.97892	5.95715	5.65906	5.08755	5.39667	5.45539	5.08637	5.4021	5.38082	5.33049	5.12207	4.59448	4.60416	4.90565	5.23742	5.46541	5.9242	6.43929	6.43998	6.21813	5.67523	5.44899	5.32136	5.5672	5.45213	5.29243	5.50301	5.85443	5.20822	4.67557	4.41826
3	euxassay_008615_11.jpg	NM_145133	211550	Tifa	T2bp	7569				1	5.61188	5.38774	5.50827	5.484	6.33715	6.08385	6.7674	6.44779	6.57978	5.88942	6.39594	6.43426	6.36321	5.85162	5.82811	6.91635	6.13043	5.06705	4.84522	4.92864	6.22946	5.7803	5.41053	6.27226	6.03661	5.6697	6.01198	6.14062	6.36671	6.1777	6.70029	6.65488	6.51815	6.39366	6.18521	6.06633	6.3349	6.43315	5.46634
3	euxassay_000161_11.jpg	NM_025387	66154	Tmem14c	1110021D01Rik|AU020193|HSPC194	7540|7558|7569				1	5.96437	6.67496	6.91857	6.75827	6.48432	6.65585	6.43873	6.61457	6.56498	6.51257	6.78386	6.59712	6.58482	6.6704	6.84453	6.53487	6.5541	6.39558	6.47774	6.15631	6.21367	6.63439	6.57482	6.53907	6.57706	6.66235	6.72405	6.56565	6.53763	6.51992	6.43057	6.37062	6.70799	6.43872	6.71716	6.59447	6.40772	6.40166	6.54966
3	euxassay_013745_11.jpg	XM_001005347	320429	Trank1	A230061D21Rik|C030048J01Rik|Gm187|Lba1	7557				1	5.51997	5.94188	5.71176	5.59753	5.62052	5.47194	5.53552	5.8583	5.92445	6.4666	6.10103	5.83508	6.10608	6.09009	5.93497	5.76016	5.64101	5.60743	5.23499	5.47013	5.34903	5.90986	5.92878	5.88101	5.77585	5.76873	5.82475	5.75777	5.96149	6.2168	5.88837	5.97884	5.83274	5.89692	5.8766	5.7443	5.84534	5.60084	5.55156
3	euxassay_012562_11.jpg	NM_013735	27223	Trp53bp1	53BP1|MGC100303|Tp53bp1|m53BP1	7469				1	5.84859	5.59864	6.14019	6.38232	6.25798	6.26425	5.98813	5.84581	5.93759	5.73249	5.95139	6.35308	6.41187	5.80711	5.60721	5.54058	5.32878	5.38433	4.94857	4.44268	5.64902	5.95793	5.77097	6.03492	6.22585	6.55819	6.53734	5.91031	5.95535	6.08773	6.45124	6.18612	6.08867	6.19402	5.91253	5.64806	5.79964	5.25514	5.15252
3	euxassay_006694_11.jpg	NM_025782	69863	Ttc39b	1810054D07Rik|9130422G05Rik|AI450603|AV103077|AW215585	7539				1	4.0998	4.2268	4.33719	5.16419	4.67251	5.00157	4.80686	4.57903	4.39623	4.36234	4.71799	3.71716	4.68097	4.29044	4.41401	4.33679	4.17094	4.23618	3.92931	3.80005	4.1054	4.09042	4.56826	4.90536	5.00955	4.9405	5.16597	5.9712	5.14687	5.18593	4.69806	4.30875	4.32883	4.85446	4.21476	3.91343	3.9293	3.77392	4.26357
3	euxassay_001259_11.jpg	NM_134028	103768	Tubg2	AI504772|Tubgl	7558|7569				1	6.46367	6.63957	6.47658	6.3973	6.11789	6.31772	6.21973	6.33654	6.36349	6.42101	6.54489	6.58742	6.49066	6.36015	6.33285	6.25923	6.18589	5.86912	5.97144	5.86729	6.24017	6.86198	6.62735	6.8829	6.41055	6.36154	6.32373	6.24832	6.29631	6.18552	6.45873	6.63857	6.69459	6.60136	6.69536	6.54497	6.35372	5.97654	5.98711
3	euxassay_012464_14.jpg	NM_033607	93841	Uchl4	-	7536				1	5.70817	5.3533	6.17462	5.6307	5.69399	5.32158	5.90613	5.6455	5.48941	5.84162	6.47594	6.06756	6.31261	6.02018	5.95061	5.49936	5.41734	5.23464	5.86656	5.69074	5.31112	5.46494	5.60721	5.8704	5.36501	5.3399	5.14075	6.18171	6.28892	5.53921	6.08112	5.92577	6.05194	6.07649	5.65699	5.358	5.70387	6.20482	5.59117
3	euxassay_000993_11.jpg	NM_029770	107449	Unc5b	6330415E02Rik|A630020F16|D10Bwg0792e|Unc5h2	7537				1	5.74105	5.75448	5.66305	6.13392	6.26892	6.56455	7.00504	6.94255	7.12932	6.80978	6.50784	6.51925	6.32432	6.29366	6.30654	6.08202	6.10549	6.0749	5.90963	5.60221	6.14453	5.62621	5.62566	5.92686	6.355	7.16363	7.04382	6.91978	6.97243	6.68395	6.46977	6.271	6.10781	5.96628	5.94952	5.83811	5.83671	5.78183	5.7518
3	euxassay_002869_11.jpg	NM_029770	107449	Unc5b	6330415E02Rik|A630020F16|D10Bwg0792e|Unc5h2	7539				1	5.21965	4.77958	5.56205	5.59945	5.96543	6.3812	7.04726	7.02199	7.14903	7.0359	6.65984	6.24411	6.14868	6.28237	6.01997	5.98429	5.9222	5.71992	5.40585	5.49243	5.78823	5.73504	5.56068	5.72858	5.81573	6.33064	6.66854	7.08926	7.23861	7.20695	6.83387	6.20698	6.0753	6.03022	6.02038	5.86403	5.85668	5.81457	5.60879
3	euxassay_012466_14.jpg	NM_153135	210801	Unc5d	D930029E11Rik|KIAA1777|Unc5h4|mKIAA1777	7538|7557				1	4.28531	4.4648	4.73765	5.44336	5.92351	5.24055	5.82313	6.36918	6.83124	6.13314	4.7445	4.61685	4.68965	4.65553	4.59143	4.42551	4.54902	4.46959	4.32169	4.34329	4.23192	4.50595	4.30572	4.78348	5.22778	5.90223	6.67013	6.15483	6.39117	5.49632	5.05875	4.6009	4.85149	5.0373	4.54608	4.21476	4.41696	4.36123	4.47475
3	euxassay_005002_11.jpg	NM_027604	14479	Usp15	4921514G19Rik|AI327321|E430033I05Rik|Gcap18|mKIAA0529	7469				1	6.27276	6.50228	6.47611	6.05176	6.09852	6.51956	6.62293	6.62591	7.07864	7.0257	6.55352	6.60191	6.4251	6.34059	6.25489	6.65552	6.2595	6.33411	5.95396	6.12218	6.60218	6.90159	6.17002	6.2314	6.42572	6.46466	6.39335	6.59197	6.78385	6.73903	6.70204	6.54325	6.53635	6.69123	6.24562	6.17372	6.22048	5.89968	5.63971
3	euxassay_004685_14.jpg	NM_173016	270097	Vat1l	9430073I07|AI427515|mKIAA1576	7557				1	5.91146	4.94233	4.58572	4.49053	5.46348	5.09035	5.19471	4.92871	5.01799	5.29202	5.33038	5.64342	5.30526	5.1682	5.18041	4.71036	5.12866	4.73915	4.41025	4.32084	5.21966	4.64138	4.41589	4.42897	4.9405	5.16597	5.36092	5.1782	4.90081	4.99932	4.98926	5.11485	5.42202	5.07736	4.94441	4.76296	5.20343	4.7271	4.27396
3	euxassay_005115_14.jpg	NM_172538	215008	Vezt	6330418D12|AI854408|vezatin	7469				1	5.90261	6.22784	5.88334	6.04293	5.82556	5.90948	5.91651	5.95492	6.00695	6.26007	6.19774	5.95147	6.09048	6.23084	6.04992	6.15676	5.98602	5.84813	5.52105	5.17562	6.15515	6.30777	5.86106	5.81827	5.63918	5.70869	6.02388	5.98981	6.25867	6.29995	6.34567	6.32282	6.35059	6.23546	6.29995	6.14887	6.07193	5.89333	5.58701
3	euxassay_005031_14.jpg	NM_019653	78889	Wsb1	1110056B13Rik|2700038M07Rik	7469				2	5.66042	5.427	5.70597	5.19288	5.72367	5.66612	6.01047	6.06465	5.83232	6.14023	5.87828	5.99195	5.85132	6.20858	6.0502	5.5749	5.22838	4.82893	4.58361	4.52389	5.68379	5.44342	4.9754	4.64362	5.19551	5.84632	6.08226	6.23052	6.34498	6.31831	6.15605	5.83681	5.71393	5.77141	5.86128	5.85742	5.16008	4.81191	4.7667
3	euxassay_009156_14.jpg	NM_138590	319885	Zcchc7	4930572I07Rik|D4Wsu132e|MGC62855	7469				1	3.95235	4.76468	5.26604	5.21085	5.02231	5.47749	5.68802	5.30981	5.34967	5.78327	5.68439	5.89882	5.93508	5.42622	5.35946	5.45878	4.92805	4.26043	4.21656	4.31487	4.57146	4.32717	4.99994	5.47088	5.24506	5.62445	5.64755	5.71421	5.61467	6.09722	6.39896	6.19126	5.79534	5.65606	5.53278	5.50775	4.78129	4.46662	4.37173
3	euxassay_012797_11.jpg	NM_146224	235469	Zfp280d	A930005F02Rik|BC027163|MGC36902|Suhw4|ZNF634|Znf280d	7469				1	4.75556	4.61545	5.07617	5.10983	5.13969	4.96594	5.22574	5.46045	5.17487	5.4653	5.33369	5.07854	5.62161	5.30221	5.01303	5.29814	4.7917	4.84194	4.91902	4.21476	4.89601	5.00057	4.87053	4.76542	5.14423	5.28244	5.09817	5.30424	5.40793	5.22216	5.33634	5.25682	5.4242	5.28518	4.97446	4.97616	4.78105	4.68045	4.70319
3	euxassay_015921_11.jpg	NM_207245	240066	Zfp870	AI173952|MGC86136	7470				1	5.10903	6.19116	5.49698	6.1432	5.80957	5.6522	5.68839	5.77389	6.15067	5.8508	6.34184	5.85136	5.73398	5.84635	6.19028	5.72371	5.77027	5.7732	5.4689	5.19644	6.0889	5.99615	5.41249	5.57191	5.79953	5.59033	5.78216	5.76359	5.55041	5.85089	6.05474	6.04223	6.06356	6.03124	6.04425	5.86104	5.79953	5.57135	5.0554
3	euxassay_009942_11.jpg	NM_025635	52696	Zwint	2010007E07Rik|2600001N01Rik|D10Ertd749e|Zwint-1	7469				1	5.3451	5.41815	6.24606	6.03772	5.42775	5.47125	5.5029	5.21981	5.15316	5.65789	6.10314	6.05779	5.98735	5.84958	5.56348	5.86243	5.56686	5.41108	5.29066	5.24348	5.87126	6.66156	6.01204	5.46608	5.3178	5.34002	5.623	5.71481	6.05228	5.99491	5.97357	5.86027	5.85553	5.33662	5.39084	5.49581	4.90125	5.09271	4.61327
3	euxassay_019412_11.jpg	MIMAT0003896	na	mmu-miR-763					miRNA	1	5.40622	5.37951	5.74195	5.59287	5.16075	5.62918	5.19907	5.17856	5.93103	5.4242	5.6591	5.72927	5.77731	6.25308	5.55327	5.35473	5.41295	5.28996	5.18298	4.87599	5.62323	5.13132	5.77585	5.63511	5.69203	5.83882	5.76998	5.54699	5.55838	5.61617	5.81244	5.54528	5.6254	5.75473	5.70079	5.18372	6.10646	5.66332	4.89156
4	euxassay_002579_14.jpg	NM_027860	71675	0610010F05Rik	Kiaa1841|mKIAA1841	7469				1	6.71772	6.98335	6.89721	6.82577	7.21084	6.59983	6.12304	6.10763	6.09752	5.87523	5.5286	5.96608	5.52454	5.82758	6.07114	6.32982	5.79089	6.23013	5.69048	5.33832	6.32787	7.05903	6.97633	6.89958	6.59015	6.51765	6.629	6.27911	6.08025	5.90764	5.92181	6.01441	6.04912	5.83742	6.00528	5.63188	5.77585	5.88883	5.71205
4	euxassay_013715_11.jpg	NM_172963	68617	1110012J17Rik	Ccdc165|D130071O13|Kiaa0802|MGC77963|mKIAA0802|t8219b25	7469				1	6.08058	6.9525	7.39792	6.84338	7.12158	6.44089	6.35968	5.77753	5.45975	5.63255	5.7294	6.18297	6.04023	6.43683	5.8818	6.38694	6.22226	5.65484	5.9417	5.69407	6.37405	6.70273	7.01531	6.96384	6.99384	7.1875	6.77037	6.23795	6.26301	6.25726	5.92729	5.86951	5.79712	5.70256	6.28835	6.13543	6.07607	5.66435	5.34947
4	euxassay_009759_11.jpg	XM_902711	72325	1300018I17Rik	2410004N05Rik|5DOS1	7469				1	5.04286	5.00414	4.71748	4.63279	4.70831	4.60121	4.66684	4.69083	4.57791	4.51387	4.54166	4.48433	4.66263	4.47835	4.67628	4.60451	4.33745	4.32284	4.24184	3.82194	4.12705	4.82749	5.05944	4.69054	4.59349	4.69497	4.49977	4.32418	4.27258	4.80801	4.74564	4.46753	4.46269	4.67837	4.54624	4.6531	4.44071	4.17686	4.26426
4	euxassay_001703_11.jpg	NM_025559	103742	1810046J19Rik	AI463380|Rdx12	7558				1	4.91637	4.89138	4.88054	4.91105	4.66369	4.51737	4.39319	4.31078	4.24043	4.05034	3.945	3.89739	4.05034	4.13489	4.07908	4.05034	4.05034	4.05034	4.03576	3.91874	4.79459	4.82507	4.99388	4.79651	4.76149	4.58238	4.55877	4.43083	4.29044	4.2781	4.18863	4.05034	4.05034	4.05034	4.05034	3.9293	3.80293	3.7202	3.52515
4	euxassay_007134_11.jpg	NM_001002004	72503	2610507B11Rik	AU022687|D11Bhm178e|D11Bhm179e|E1|KIAA0100|mKIAA0100	7469				1	7.5451	7.56793	7.52957	7.54098	7.45899	7.34982	6.82629	6.48025	5.90559	5.52187	5.76528	5.3851	5.37664	5.75745	5.74031	5.31636	5.57108	5.25367	5.36092	5.47704	7.35825	7.46263	7.55877	7.26899	7.02053	7.15393	7.02473	6.35111	5.57462	5.52134	5.22181	5.54985	5.25157	5.31536	5.96158	5.68841	5.27969	5.50025	5.43598
4	euxassay_000995_11.jpg	NM_144518	67254	2900011O08Rik	-	7557|7558				1	5.66733	6.66647	7.16011	6.58449	6.34725	6.19366	5.78993	5.71988	6.11813	5.54002	5.90462	5.54002	5.50303	5.56258	5.7458	5.57272	5.50726	5.72595	5.50303	5.37832	6.15961	6.83927	7.24499	7.21922	6.78884	5.9551	5.9348	5.63855	5.95923	5.58346	5.66407	5.57474	5.83612	5.88631	5.70398	5.79282	5.91687	5.96694	5.66407
4	euxassay_011200_11.jpg	NM_172450	207819	4930539E08Rik	9130014G02	7469				1	5.94343	6.62668	6.29159	6.30415	6.02856	6.24374	6.40407	6.21021	5.94819	6.09651	6.25602	6.18803	6.00213	5.90024	5.83902	5.97944	5.93384	5.68707	5.79292	5.49322	6.53232	6.68767	6.67951	5.90024	6.18289	6.46552	5.83948	6.1479	6.26404	6.08199	6.01334	6.2066	5.93078	5.82824	5.6938	5.64764	5.65932	5.92155	5.81359
4	euxassay_015775_11.jpg	AK030345	329406	5230400M03Rik	-	7538				1	4.57769	4.57096	4.83184	4.72558	4.68876	4.78377	5.30221	4.6962	4.752	4.68876	4.62393	4.57096	4.53684	4.51036	4.40987	4.6548	4.29534	4.30511	4.42338	4.49764	4.84863	4.93501	4.93606	5.26267	4.97429	4.99153	5.103	5.42892	4.71219	4.75556	4.40987	4.63429	4.62782	4.76738	4.78842	4.50189	4.2723	4.40836	4.22765
4	euxassay_005064_11.jpg	NM_001004361	66648	5730494M16Rik	5730437P09Rik|AI666318|MGC91164|Pgs2	7469				2	5.16215	6.017	6.03178	5.74031	5.72438	5.56081	5.52496	5.58963	5.59058	5.62254	6.02089	5.89916	5.87009	5.64056	5.37686	5.39112	5.35856	5.24419	5.04634	4.96362	5.28345	6.05474	6.01996	6.03042	5.73892	5.81217	5.55644	5.36191	5.57	5.79248	5.93066	5.90872	5.82314	5.57097	5.44678	4.98475	4.98909	5.0134	5.09807
4	euxassay_005064_14.jpg	NM_001004361	66648	5730494M16Rik	5730437P09Rik|AI666318|MGC91164|Pgs2	7469				2	6.01512	6.39414	6.07235	5.89556	6.13847	6.13819	5.95491	5.92026	5.86563	5.70129	5.4435	5.3986	5.51929	5.65392	5.62458	5.71814	5.35276	5.35472	5.25697	5.01755	5.87374	6.31961	6.37238	6.28942	5.83558	6.02089	5.99787	5.6355	5.65551	5.56233	5.45268	5.66226	5.07337	5.22679	5.16167	5.22197	5.57584	5.5114	5.48659
4	euxassay_016118_11.jpg	AK017919	74742	5830411J07Rik	-	7538|7557				1	5.53322	6.31278	6.03044	6.15526	6.01358	5.57136	5.86565	5.93497	6.09947	5.84162	5.35212	6.01606	5.8606	6.15264	6.17721	5.61563	5.78266	5.26351	5.72463	6.01176	6.75506	6.94092	6.42399	6.74164	6.25448	6.36751	6.06636	6.00985	5.72927	6.23546	5.96907	5.65168	5.96821	5.67801	5.48153	5.80252	5.90077	5.66648	5.65444
[truncated: 877 more rows]
[truncated: 33 more columns]

## Sheet: Table S4
Table S4. Functional terms significantly enriched in each of the 6 clusters determined by the DAVID package (p value < 0.05).
[truncated: 1,053 more rows]

## Sheet: Table S5
Table S5. Significance of overlaps between the ISH based gene expression clusters and the RNA-seq/microarray derived differentially expressed genes or cell cylce stage genes as determined by Bonferroni corrected Fisher’s exact test p values.
[truncated: 39 more rows]

[truncated: 6 more sheets: Table S6, Table S7, Table S8, Table S9, Table S10, Table S11]
